# Supplementary material for: Structural Alternation in Heat Shock Proteins of Activated Macrophages
Source: Cells. 2021 Dec 11;10(12):3507. doi: 10.3390/cells10123507 (PMC8700196; doi:10.3390/cells10123507)
Supplement: Supplementary file 1 [file cells-10-03507-s001.zip › Figures S1-S8.pdf]

**Supplementary Figure S1 The volcano plot of protein abundance and LiP-peptide changes during inflammatory response**

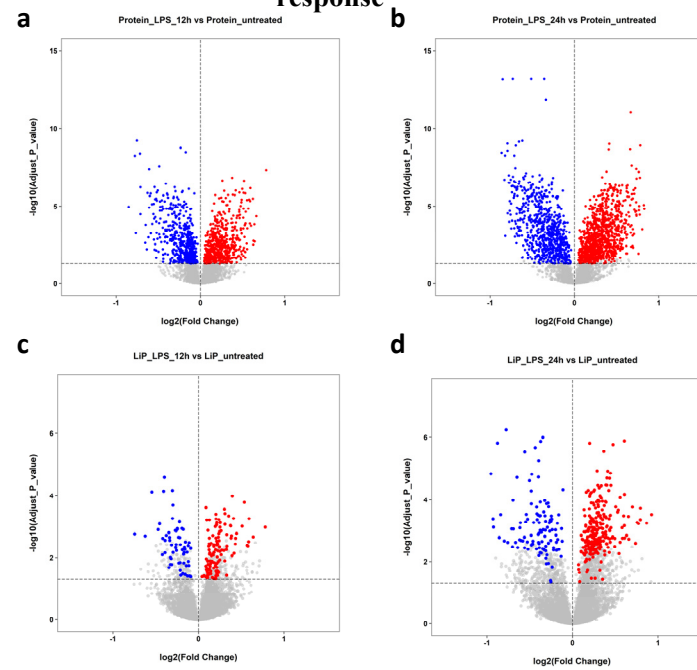

Supplementary Figure S2 LiP-peptide enriched by GO-  
Biological Process

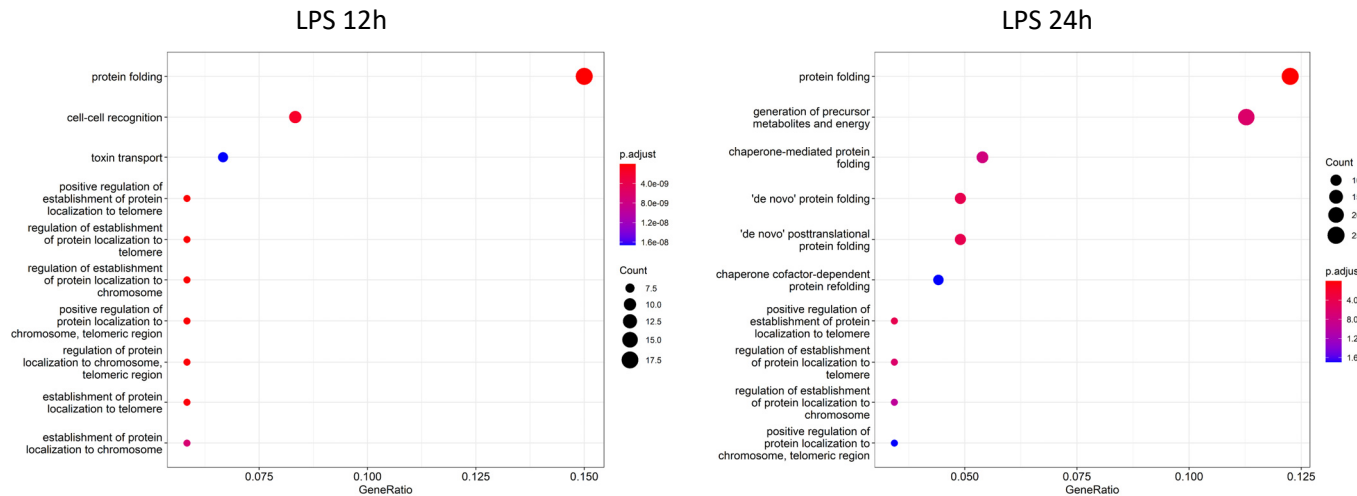

Supplementary Figure S3 LiP-peptide enriched by GO-  
Molecular Function

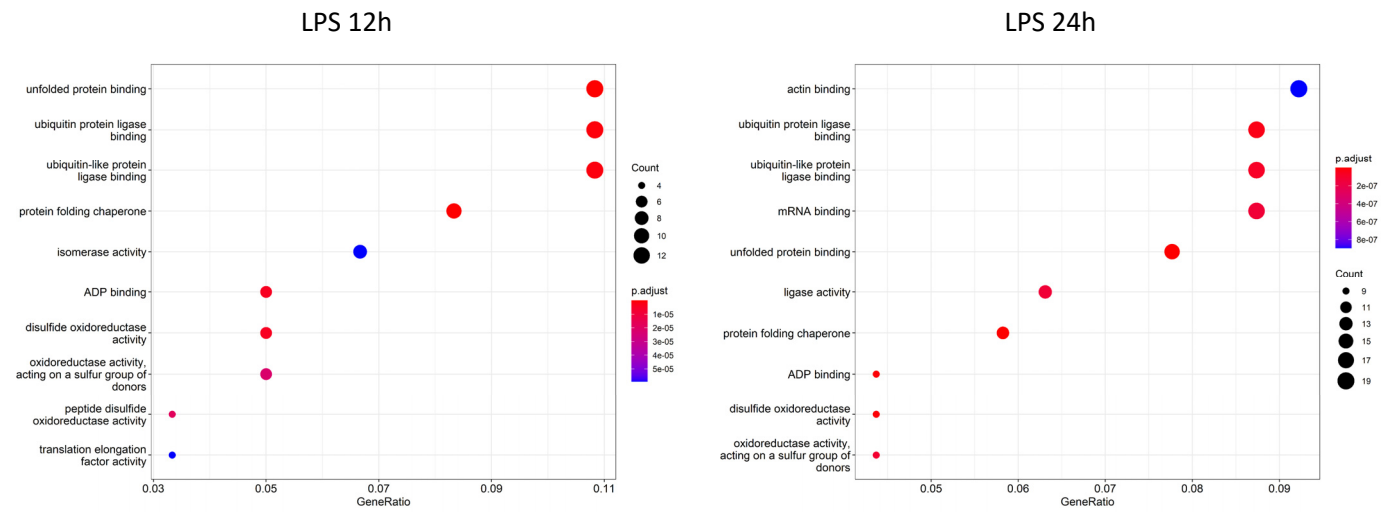

Supplementary Figure S4 LiP-peptide enriched by GO-  
Cellular Component

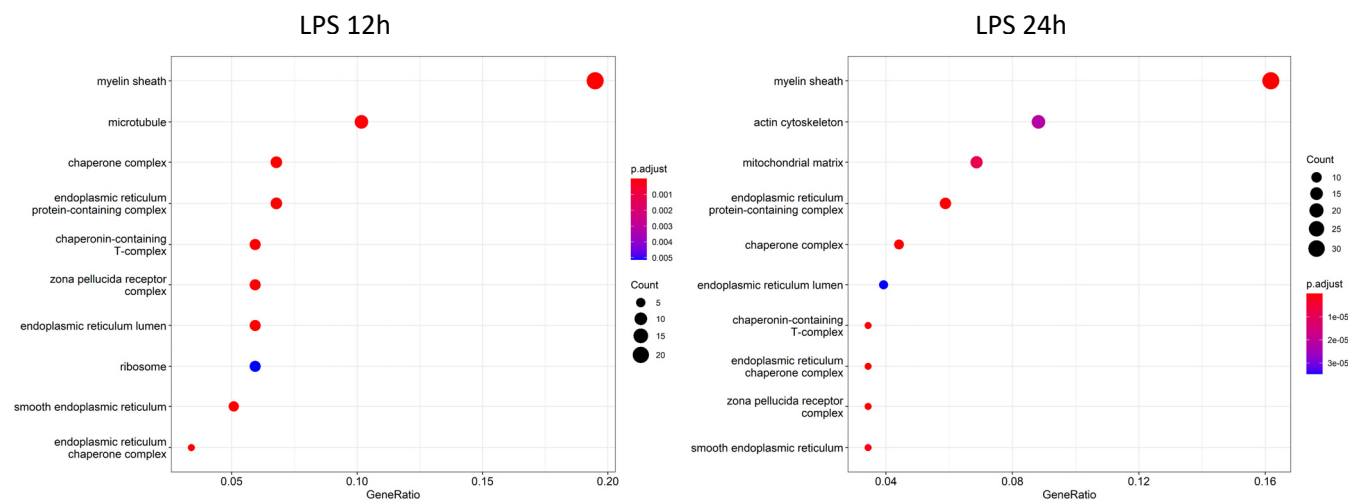

Supplementary Figure S5 Proteins enriched by GO-  
Biological Process

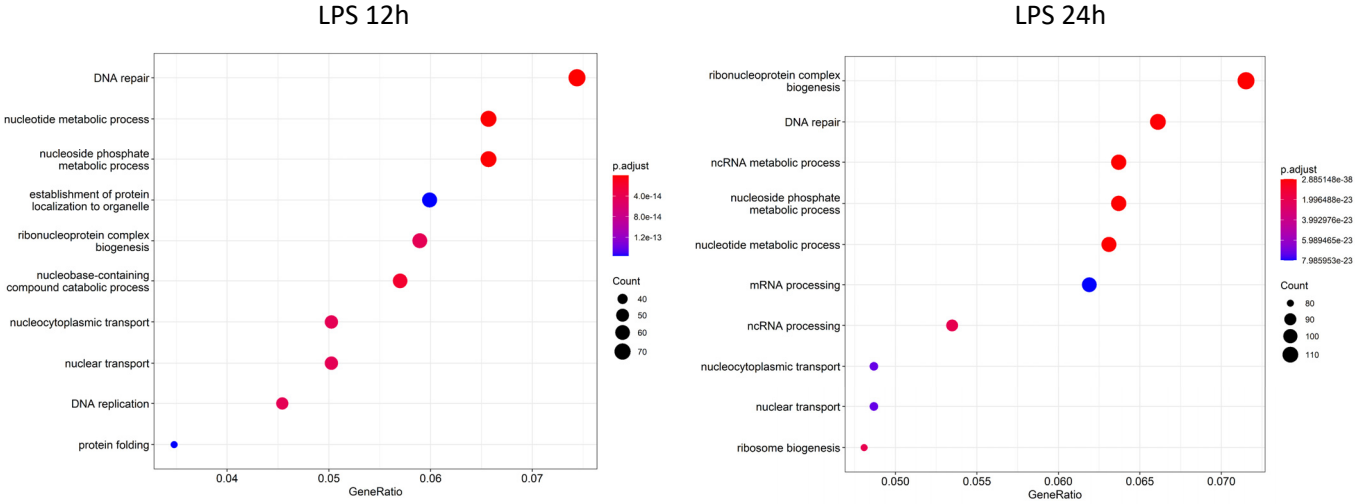

**Supplementary Figure S6 Proteins enriched by GO-Molecular Function**

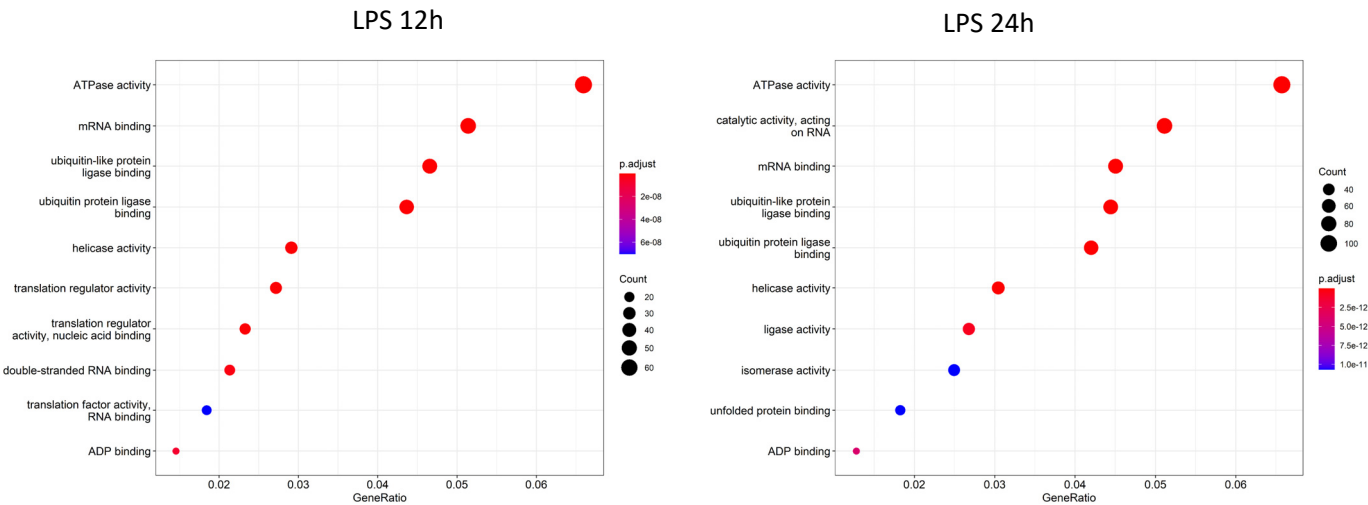

Supplementary Figure S7 Proteins enriched by GO-Cellular Component

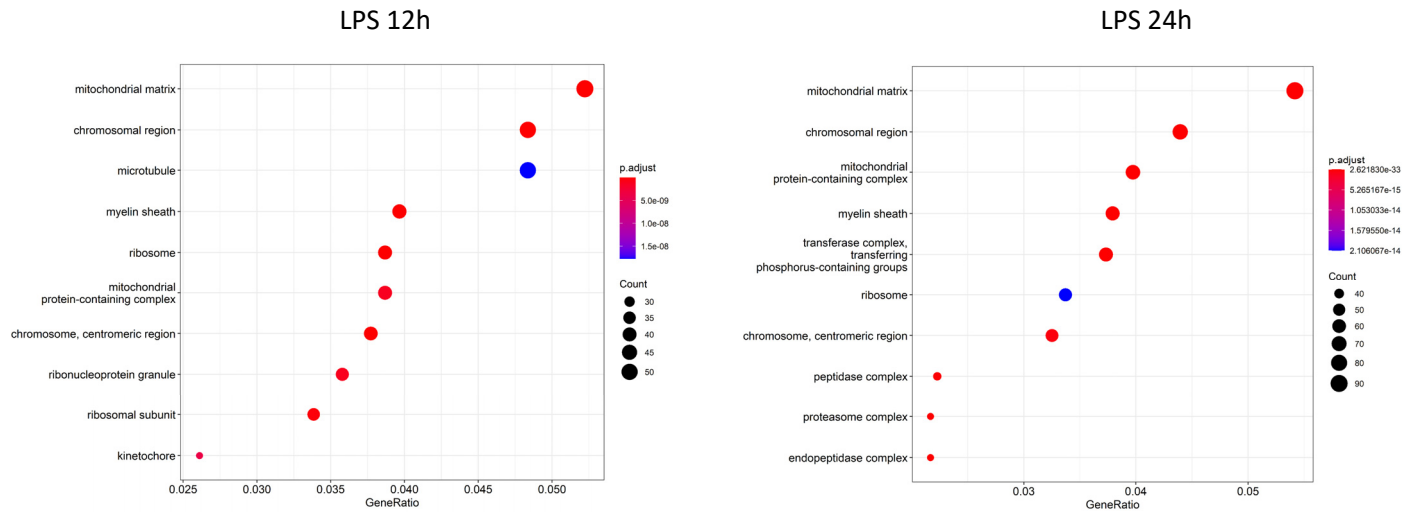

## Supplementary Figure S8 Alinement of mouse HSP60 and human HSP60 protein sequences

|        |            |     |                                                                |
|--------|------------|-----|----------------------------------------------------------------|
| P10809 | CH60_HUMAN | 1   | MLRLPTVFRQMRPVSRVLAPHLTRAYAKDVKFGADARALMLQGVDLLADAVAVTMGPKGR   |
| P63038 | CH60_MOUSE | 1   | MLRLPTVLRQMRPVSRALAPHLTRAYAKDVKFGADARALMLQGVDLLADAVAVTMGPKGR   |
|        |            |     | *****:*****.                                                   |
| P10809 | CH60_HUMAN | 61  | TVIIIEQSWGSPKVTIKDGVTVAKSIDLKDKYKNIGAKLVQDVANNTNEEAGDGTITATVLA |
| P63038 | CH60_MOUSE | 61  | TVIIIEQSWGSPKVTIKDGVTVAKSIDLKDKYKNIGAKLVQDVANNTNEEAGDGTITATVLA |
|        |            |     | *****:*****.                                                   |
| P10809 | CH60_HUMAN | 121 | RSIAKEGFEEKISKGANPVEIRRGVMLAVDAVIAELKKQSKPVTTPPEEIAQVATISANGDK |
| P63038 | CH60_MOUSE | 121 | RSIAKEGFEEKISKGANPVEIRRGVMLAVDAVIAELKKQSKPVTTPPEEIAQVATISANGDK |
|        |            |     | *****:*****.                                                   |
| P10809 | CH60_HUMAN | 181 | EIGNIISDAMKKVGRKGVITVKDGKTLNDELEIIEGMKFDRGYISPYFINTSKGQKCEFQ   |
| P63038 | CH60_MOUSE | 181 | DIGNIISDAMKKVGRKGVITVKDGKTLNDELEIIEGMKFDRGYISPYFINTSKGQKCEFQ   |
|        |            |     | :*****:*****.                                                  |
| P10809 | CH60_HUMAN | 241 | DAYVLLSEKKISSVQSIQIVPALETANAHKPLVITIAEDVDGEALSTLVNRLKVGQVAV    |
| P63038 | CH60_MOUSE | 241 | DAYVLLSEKKISSVQSIQIVPALETANAHKPLVITIAEDVDGEALSTLVNRLKVGQVAV    |
|        |            |     | *****:*****.                                                   |
| P10809 | CH60_HUMAN | 301 | KAPGFGDNRRKNQLKDMAIATGGAVFGEEGLTLNLEDVQPHDLGKVGIVVTKDDAMLLKG   |
| P63038 | CH60_MOUSE | 301 | KAPGFGDNRRKNQLKDMAIATGGAVFGEEGLTLNLEDVQAHDLGKVGIVVTKDDAMLLKG   |
|        |            |     | *****:*****.                                                   |
| P10809 | CH60_HUMAN | 361 | KGDKAHIEKRIQEIIEQLDVITSEYEKEKLNERLAKLSDGVAVLVKGGTSDVEVNEKKDR   |
| P63038 | CH60_MOUSE | 361 | KGDKAHIEKRIQEIIEQLDVITSEYEKEKLNERLAKLSDGVAVLVKGGTSDVEVNEKKDR   |
|        |            |     | *****:*****.                                                   |
| P10809 | CH60_HUMAN | 421 | VTDALNATRAAVEEGIVLGGGCALLRCIPALDSLTPANEDQKIGIEIIRKTLKIPAMTIA   |
| P63038 | CH60_MOUSE | 421 | VTDALNATRAAVEEGIVLGGGCALLRCIPALDSLTPANEDQKIGIEIIRKTLKIPAMTIA   |
|        |            |     | *****:*****.                                                   |
| P10809 | CH60_HUMAN | 481 | KNAGVEGSLIVEKIMQSSSEVGYDAMAGDFVNMVEKGIIDPTKVVRTALLDAAGVASLLT   |
| P63038 | CH60_MOUSE | 481 | KNAGVEGSLIVEKILQSSSEVGYDAMAGDFVNMVEKGIIDPTKVVRTALLDAAGVASLLT   |
|        |            |     | *****:*****.                                                   |
| P10809 | CH60_HUMAN | 541 | TAEVVVTEIPKEEKDPGMGAMGGMGGMGGGMF                               |
| P63038 | CH60_MOUSE | 541 | TAEVVVTEIPKEEKDPGMGAMGGMGGMGGGMF                               |
|        |            |     | ***.*****                                                      |
