# Supplementary material for: Structural Alternation in Heat Shock Proteins of Activated Macrophages
Source: Cells. 2021 Dec 11;10(12):3507. doi: 10.3390/cells10123507 (PMC8700196; doi:10.3390/cells10123507)
Supplement: Supplementary file 1 [file cells-10-03507-s001.zip › Supplementary table S1.xlsx]

## Sheet: Sheet1
Table S1 The sequences of primers used in this study
Species	Gene name	Forword primer sequence (5'-3')	Reverse primer sequence (5'-3')
Mouse	IL-1β	GCCACCTTTTGACAGTGATGAG	AAGGTCCACGGGAAAGACAC
Mouse	Il-6	TCCTCTCTGCAAGAGACTTCC	CTGCAAGTGCATCATCGTTGT
Mouse	β-Actin	CCAGACCCGCCACCAGTTCG	TAGAGCCCGGGGAGCATCGT
