# Supplementary material for: Structural Alternation in Heat Shock Proteins of Activated Macrophages
Source: Cells. 2021 Dec 11;10(12):3507. doi: 10.3390/cells10123507 (PMC8700196; doi:10.3390/cells10123507)
Supplement: Supplementary file 1 [file cells-10-03507-s001.zip › Supplementary table S2-S5.xlsx]

## Sheet: Structure Changed Protein List
Table S2 The list of structural reads significantly changed proteins in this study
Uniprot Protein Accession	Genes	Protein Description	LiP 12h Sum of significant LiP Peptide absolute -log10(p.adjust)	LiP 24h P Sum of significant LiP Peptide absolute -log10(p.adjust)
Q8BGD9	Eif4b	Eukaryotic translation initiation factor 4B (eIF-4B)	9.177
P27659	Rpl3	60S ribosomal protein L3 (J1 protein)	3.34823
Q8C147	Dock8	Dedicator of cytokinesis protein 8	3.33575
P31230	Aimp1 Emap2 Scye1	Aminoacyl tRNA synthase complex-interacting multifunctional protein 1 (Multisynthase complex auxiliary component p43) [Cleaved into: Endothelial monocyte-activating polypeptide 2 (EMAP-2) (Endothelial monocyte-activating polypeptide II) (EMAP-II) (Small inducible cytokine subfamily E member 1)]	3.25137
Q58A65	Spag9 Jip4 Jsap2 Kiaa0516 Mapk8ip4	C-Jun-amino-terminal kinase-interacting protein 4 (JIP-4) (JNK-interacting protein 4) (JNK-associated leucine-zipper protein) (JLP) (JNK/SAPK-associated protein 2) (JSAP2) (Mitogen-activated protein kinase 8-interacting protein 4) (Sperm-associated antigen 9)	2.97672
P53026	Rpl10a Nedd-6 Nedd6	60S ribosomal protein L10a (CSA-19) (Neural precursor cell expressed developmentally down-regulated protein 6) (NEDD-6)	2.91962
P14211	Calr	Calreticulin (CRP55) (Calregulin) (Endoplasmic reticulum resident protein 60) (ERp60) (HACBP)	2.7648
P97825	Jpt1 Hn1	Jupiter microtubule associated homolog 1 (Hematological and neurological expressed 1 protein) [Cleaved into: Jupiter microtubule associated homolog 1, N-terminally processed]	2.70421
P05064	Aldoa Aldo1	Fructose-bisphosphate aldolase A (EC 4.1.2.13) (Aldolase 1) (Muscle-type aldolase)	2.69835
P60843	Eif4a1 Ddx2a Eif4a	Eukaryotic initiation factor 4A-I (eIF-4A-I) (eIF4A-I) (EC 3.6.4.13) (ATP-dependent RNA helicase eIF4A-1)	2.55536
Q9D7B1	Dus2 Dus2l	tRNA-dihydrouridine(20) synthase [NAD(P)+]-like (EC 1.3.1.91) (Dihydrouridine synthase 2) (tRNA-dihydrouridine synthase 2-like)	2.25671
P60766	Cdc42	Cell division control protein 42 homolog (EC 3.6.5.2) (G25K GTP-binding protein)	2.0963
P54775	Psmc4 Tbp7	26S proteasome regulatory subunit 6B (26S proteasome AAA-ATPase subunit RPT3) (CIP21) (MB67-interacting protein) (MIP224) (Proteasome 26S subunit ATPase 4) (Tat-binding protein 7) (TBP-7)	1.88394
Q61024	Asns	Asparagine synthetase [glutamine-hydrolyzing] (EC 6.3.5.4) (Glutamine-dependent asparagine synthetase)	1.81442
P63038	Hspd1 Hsp60	60 kDa heat shock protein, mitochondrial (EC 5.6.1.7) (60 kDa chaperonin) (Chaperonin 60) (CPN60) (HSP-65) (Heat shock protein 60) (HSP-60) (Hsp60) (Mitochondrial matrix protein P1)	5.45998	48.8702
P58252	Eef2	Elongation factor 2 (EF-2)	27.609	42.9202
P20029	Hspa5 Grp78	Endoplasmic reticulum chaperone BiP (EC 3.6.4.10) (78 kDa glucose-regulated protein) (GRP-78) (Binding-immunoglobulin protein) (BiP) (Heat shock protein 70 family protein 5) (HSP70 family protein 5) (Heat shock protein family A member 5) (Immunoglobulin heavy chain-binding protein)	6.20271	36.1833
P08113	Hsp90b1 Grp94 Tra-1 Tra1	Endoplasmin (94 kDa glucose-regulated protein) (GRP-94) (Endoplasmic reticulum resident protein 99) (ERp99) (Heat shock protein 90 kDa beta member 1) (Polymorphic tumor rejection antigen 1) (Tumor rejection antigen gp96)	1.83936	35.5711
P17751	Tpi1 Tpi	Triosephosphate isomerase (TIM) (EC 5.3.1.1) (Methylglyoxal synthase) (EC 4.2.3.3) (Triose-phosphate isomerase)	16.9655	22
P10126	Eef1a1 Eef1a	Elongation factor 1-alpha 1 (EF-1-alpha-1) (Elongation factor Tu) (EF-Tu) (Eukaryotic elongation factor 1 A-1) (eEF1A-1)	2.91171	20.5221
P09103	P4hb Pdia1	Protein disulfide-isomerase (PDI) (EC 5.3.4.1) (Cellular thyroid hormone-binding protein) (Endoplasmic reticulum resident protein 59) (ER protein 59) (ERp59) (Prolyl 4-hydroxylase subunit beta) (p55)	1.47474	15.6135
P18760	Cfl1	Cofilin-1 (Cofilin, non-muscle isoform)		15.0677
P62259	Ywhae	14-3-3 protein epsilon (14-3-3E)	7.72781	14.6153
P18242	Ctsd	Cathepsin D (EC 3.4.23.5)	4.66204	13.6508
P52480	Pkm Pk3 Pkm2 Pykm	Pyruvate kinase PKM (EC 2.7.1.40) (Pyruvate kinase muscle isozyme)	6.59043	13.4359
P63017	Hspa8 Hsc70 Hsc73	Heat shock cognate 71 kDa protein (EC 3.6.4.10) (Heat shock 70 kDa protein 8)	6.38395	11.975
Q9CY58	Serbp1 Pairbp1	Plasminogen activator inhibitor 1 RNA-binding protein (PAI1 RNA-binding protein 1) (PAI-RBP1) (SERPINE1 mRNA-binding protein 1)	5.0094	11.7964
P56480	Atp5f1b Atp5b	ATP synthase subunit beta, mitochondrial (EC 7.1.2.2) (ATP synthase F1 subunit beta)		11.417
P80317	Cct6a Cct6 Cctz Cctz1	T-complex protein 1 subunit zeta (TCP-1-zeta) (CCT-zeta-1)	6.49074	11.2711
Q01853	Vcp	Transitional endoplasmic reticulum ATPase (TER ATPase) (EC 3.6.4.6) (15S Mg(2+)-ATPase p97 subunit) (Valosin-containing protein) (VCP)	1.47699	10.8783
P16858	Gapdh Gapd	Glyceraldehyde-3-phosphate dehydrogenase (GAPDH) (EC 1.2.1.12) (Peptidyl-cysteine S-nitrosylase GAPDH) (EC 2.6.99.-)	5.1822	9.84684
P40142	Tkt	Transketolase (TK) (EC 2.2.1.1) (P68)	5.10689	9.58363
P99029	Prdx5 Prdx6	Peroxiredoxin-5, mitochondrial (EC 1.11.1.24) (Antioxidant enzyme B166) (AOEB166) (Liver tissue 2D-page spot 2D-0014IV) (PLP) (Peroxiredoxin V) (Prx-V) (Peroxisomal antioxidant enzyme) (Thioredoxin peroxidase PMP20) (Thioredoxin-dependent peroxiredoxin 5)	5.5802	9.53483
P09671	Sod2 Sod-2	Superoxide dismutase [Mn], mitochondrial (EC 1.15.1.1)	1.46287	9.45199
P16675	Ctsa Ppgb	Lysosomal protective protein (EC 3.4.16.5) (Carboxypeptidase C) (Carboxypeptidase L) (Cathepsin A) (Protective protein cathepsin A) (PPCA) (Protective protein for beta-galactosidase) [Cleaved into: Lysosomal protective protein 32 kDa chain; Lysosomal protective protein 20 kDa chain]	3.73444	9.10624
P10605	Ctsb	Cathepsin B (EC 3.4.22.1) (Cathepsin B1) [Cleaved into: Cathepsin B light chain; Cathepsin B heavy chain]	4.58617	8.7653
Q03265	Atp5f1a Atp5a1	ATP synthase subunit alpha, mitochondrial (ATP synthase F1 subunit alpha)	1.42645	8.44328
Q8VDD5	Myh9	Myosin-9 (Cellular myosin heavy chain, type A) (Myosin heavy chain 9) (Myosin heavy chain, non-muscle IIa) (Non-muscle myosin heavy chain A) (NMMHC-A) (Non-muscle myosin heavy chain IIa) (NMMHC II-a) (NMMHC-IIA)		8.41643
P26041	Msn	Moesin (Membrane-organizing extension spike protein)		8.38644
P40124	Cap1 Cap	Adenylyl cyclase-associated protein 1 (CAP 1)		8.08007
P42932	Cct8 Cctq	T-complex protein 1 subunit theta (TCP-1-theta) (CCT-theta)	3.80084	7.95966
Q9JHK5	Plek	Pleckstrin	1.5554	7.77743
O70492	Snx3	Sorting nexin-3 (SDP3 protein)		7.6347
P62192	Psmc1	26S proteasome regulatory subunit 4 (P26s4) (26S proteasome AAA-ATPase subunit RPT2) (Proteasome 26S subunit ATPase 1)		7.4715
Q61233	Lcp1 Pls2	Plastin-2 (65 kDa macrophage protein) (L-plastin) (Lymphocyte cytosolic protein 1) (LCP-1) (pp65)		7.31795
P51859	Hdgf Tdrm1	Hepatoma-derived growth factor (HDGF)		7.29496
P07091	S100a4 Capl Mts1	Protein S100-A4 (Metastasin) (Metastatic cell protein) (PEL98) (Placental calcium-binding protein) (Protein 18A2) (Protein Mts1) (S100 calcium-binding protein A4)	3.83304	7.00271
P24452	Capg Mbh1	Macrophage-capping protein (Actin regulatory protein CAP-G) (Actin-capping protein GCAP39) (Myc basic motif homolog 1)		6.96998
P07901	Hsp90aa1 Hsp86 Hsp86-1 Hspca	Heat shock protein HSP 90-alpha (EC 3.6.4.10) (Heat shock 86 kDa) (HSP 86) (HSP86) (Tumor-specific transplantation 86 kDa antigen) (TSTA)		6.88292
Q8K1B8	Fermt3 Kind3 Urp2	Fermitin family homolog 3 (Kindlin-3) (Unc-112-related protein 2)	5.49822	6.85688
Q02053	Uba1 Sbx Ube1 Ube1ax Ube1x	Ubiquitin-like modifier-activating enzyme 1 (EC 6.2.1.45) (Ubiquitin-activating enzyme E1) (Ubiquitin-activating enzyme E1 X) (Ubiquitin-like modifier-activating enzyme 1 X)		6.70433
O35658	C1qbp Gc1qbp	Complement component 1 Q subcomponent-binding protein, mitochondrial (GC1q-R protein) (Glycoprotein gC1qBP) (C1qBP)		6.49299
P47791	Gsr Gr1	Glutathione reductase, mitochondrial (GR) (GRase) (EC 1.8.1.7)	2.67109	6.45483
Q99K48	Nono	Non-POU domain-containing octamer-binding protein (NonO protein)	3.24396	6.23019
P80316	Cct5 Ccte Kiaa0098	T-complex protein 1 subunit epsilon (TCP-1-epsilon) (CCT-epsilon)	6.90235	6.20252
P08249	Mdh2 Mor1	Malate dehydrogenase, mitochondrial (EC 1.1.1.37)		6.11367
P97807	Fh Fh1	Fumarate hydratase, mitochondrial (Fumarase) (EC 4.2.1.2) (EF-3)		6.09127
Q9JKR6	Hyou1 Grp170	Hypoxia up-regulated protein 1 (GRP-170) (140 kDa Ca(2+)-binding protein) (CBP-140)		6.04081
Q03963	Eif2ak2 Pkr Prkr Tik	Interferon-induced, double-stranded RNA-activated protein kinase (EC 2.7.11.1) (Eukaryotic translation initiation factor 2-alpha kinase 2) (eIF-2A protein kinase 2) (Interferon-inducible RNA-dependent protein kinase) (P1/eIF-2A protein kinase) (Protein kinase RNA-activated) (PKR) (Protein kinase R) (Serine/threonine-protein kinase TIK) (Tyrosine-protein kinase EIF2AK2) (EC 2.7.10.2) (p68 kinase)	5.04789	5.96438
P54987	Acod1 Irg1	Cis-aconitate decarboxylase (CAD) (EC 4.1.1.6) (Aconitate decarboxylase) (Aconitate decarboxylase 1) (Cis-aconitic acid decarboxylase) (Immune-responsive gene 1 protein)	3.46556	5.9392
P80318	Cct3 Cctg	T-complex protein 1 subunit gamma (TCP-1-gamma) (CCT-gamma) (Matricin) (mTRiC-P5)	3.01724	5.91125
P47955	Rplp1	60S acidic ribosomal protein P1		5.81593
Q9D8Y0	Efhd2 Sws1	EF-hand domain-containing protein D2 (Swiprosin-1)		5.77496
P98078	Dab2 Doc2	Disabled homolog 2 (Adaptor molecule disabled-2) (Differentially expressed in ovarian carcinoma 2) (DOC-2) (Mitogen-responsive phosphoprotein)	3.39452	5.77148
Q8BTM8	Flna Fln Fln1	Filamin-A (FLN-A) (Actin-binding protein 280) (ABP-280) (Alpha-filamin) (Endothelial actin-binding protein) (Filamin-1) (Non-muscle filamin)		5.76434
Q6PB66	Lrpprc Lrp130	Leucine-rich PPR motif-containing protein, mitochondrial (130 kDa leucine-rich protein) (LRP 130) (mLRP130)	2.34076	5.61587
Q9EQU5	Set	Protein SET (Phosphatase 2A inhibitor I2PP2A) (I-2PP2A) (Template-activating factor I) (TAF-I)		5.56678
Q8C3J5	Dock2	Dedicator of cytokinesis protein 2 (Protein Hch)	4.16535	5.52818
P29758	Oat	Ornithine aminotransferase, mitochondrial (EC 2.6.1.13) (Ornithine--oxo-acid aminotransferase)		5.48147
P80314	Cct2 Cctb	T-complex protein 1 subunit beta (TCP-1-beta) (CCT-beta)	3.9162	5.40061
P09411	Pgk1 Pgk-1	Phosphoglycerate kinase 1 (EC 2.7.2.3)		5.34822
Q8K0Z7	Taco1 Ccdc44	Translational activator of cytochrome c oxidase 1 (Coiled-coil domain-containing protein 44) (Translational activator of mitochondrially-encoded cytochrome c oxidase 1)		5.34747
P62843	Rps15 Rig	40S ribosomal protein S15 (RIG protein)	3.55717	5.3006
Q8R180	Ero1a Ero1l	ERO1-like protein alpha (ERO1-L) (ERO1-L-alpha) (EC 1.8.4.-) (Endoplasmic reticulum oxidoreductase alpha) (Endoplasmic reticulum oxidoreductin-1-like protein) (Oxidoreductin-1-L-alpha)		5.24902
Q9EST5	Anp32b Pal31	Acidic leucine-rich nuclear phosphoprotein 32 family member B (Proliferation-related acidic leucine-rich protein PAL31)	4.82801	5.2215
Q9D819	Ppa1 Pp Pyp	Inorganic pyrophosphatase (EC 3.6.1.1) (Pyrophosphate phospho-hydrolase) (PPase)	3.41576	5.0178
P60122	Ruvbl1 Tip49 Tip49a	RuvB-like 1 (EC 3.6.4.12) (49 kDa TATA box-binding protein-interacting protein) (49 kDa TBP-interacting protein) (DNA helicase p50) (Pontin 52) (TIP49a)	2.44907	4.93566
Q91ZX7	Lrp1 A2mr	Prolow-density lipoprotein receptor-related protein 1 (LRP-1) (Alpha-2-macroglobulin receptor) (A2MR) (CD antigen CD91) [Cleaved into: Low-density lipoprotein receptor-related protein 1 85 kDa subunit (LRP-85); Low-density lipoprotein receptor-related protein 1 515 kDa subunit (LRP-515); Low-density lipoprotein receptor-related protein 1 intracellular domain (LRPICD)]	2.80654	4.81824
Q99MR6	Srrt Ars2 Asr2	Serrate RNA effector molecule homolog (Arsenite-resistance protein 2)	2.91042	4.71349
P99027	Rplp2	60S acidic ribosomal protein P2	1.45507	4.7003
O70370	Ctss Cats	Cathepsin S (EC 3.4.22.27)	4.1436	4.5992
Q9JMH6	Txnrd1 Trxr1	Thioredoxin reductase 1, cytoplasmic (TR) (EC 1.8.1.9) (Thioredoxin reductase TR1)	1.85724	4.44854
P62774	Mtpn Gcdp	Myotrophin (Granule cell differentiation protein) (Protein V-1)	1.74098	4.27904
O88487	Dync1i2 Dnci2 Dncic2	Cytoplasmic dynein 1 intermediate chain 2 (Cytoplasmic dynein intermediate chain 2) (Dynein intermediate chain 2, cytosolic) (DH IC-2)	1.72505	4.27127
Q68FD5	Cltc	Clathrin heavy chain 1		4.19962
Q9CYR0	Ssbp1	Single-stranded DNA-binding protein, mitochondrial (Mt-SSB) (MtSSB)	1.50255	4.16975
Q8BH95	Echs1	Enoyl-CoA hydratase, mitochondrial (EC 4.2.1.17) (Enoyl-CoA hydratase 1) (Short-chain enoyl-CoA hydratase) (SCEH)		4.12549
Q8K0D5	Gfm1 Efg Efg1 Gfm	Elongation factor G, mitochondrial (EF-Gmt) (Elongation factor G 1, mitochondrial) (mEF-G 1) (Elongation factor G1)	1.74402	4.11335
Q9D8B3	Chmp4b	Charged multivesicular body protein 4b (Chromatin-modifying protein 4b) (CHMP4b)	1.32635	4.08249
P63325	Rps10	40S ribosomal protein S10		3.97149
P17182	Eno1 Eno-1	Alpha-enolase (EC 4.2.1.11) (2-phospho-D-glycerate hydro-lyase) (Enolase 1) (Non-neural enolase) (NNE)	6.4949	3.94786
P62889	Rpl30	60S ribosomal protein L30		3.93624
Q8CD92	Ttc27	Tetratricopeptide repeat protein 27 (TPR repeat protein 27)		3.92136
Q9Z110	Aldh18a1 P5cs Pycs	Delta-1-pyrroline-5-carboxylate synthase (P5CS) (Aldehyde dehydrogenase family 18 member A1) [Includes: Glutamate 5-kinase (GK) (EC 2.7.2.11) (Gamma-glutamyl kinase); Gamma-glutamyl phosphate reductase (GPR) (EC 1.2.1.41) (Glutamate-5-semialdehyde dehydrogenase) (Glutamyl-gamma-semialdehyde dehydrogenase)]	2.50827	3.88802
Q80X90	Flnb	Filamin-B (FLN-B) (ABP-280-like protein) (Actin-binding-like protein) (Beta-filamin)	4.71194	3.88381
Q9CZU6	Cs	Citrate synthase, mitochondrial (EC 2.3.3.1) (Citrate (Si)-synthase)	1.42661	3.71389
P67984	Rpl22	60S ribosomal protein L22 (Heparin-binding protein HBp15)		3.69155
Q05816	Fabp5 Fabpe Klbp Mal1	Fatty acid-binding protein 5 (Epidermal-type fatty acid-binding protein) (E-FABP) (Fatty acid-binding protein, epidermal) (Keratinocyte lipid-binding protein) (Psoriasis-associated fatty acid-binding protein homolog) (PA-FABP)		3.66381
Q9Z2U0	Psma7	Proteasome subunit alpha type-7 (Proteasome subunit RC6-1)		3.59238
O88342	Wdr1	WD repeat-containing protein 1 (Actin-interacting protein 1) (AIP1)		3.54083
P05063	Aldoc Aldo3 Scrg2	Fructose-bisphosphate aldolase C (EC 4.1.2.13) (Aldolase 3) (Brain-type aldolase) (Scrapie-responsive protein 2) (Zebrin II)	2.56277	3.51883
P26040	Ezr Vil2	Ezrin (Cytovillin) (Villin-2) (p81)		3.51276
Q3V3R1	Mthfd1l Fthfsdc1	Monofunctional C1-tetrahydrofolate synthase, mitochondrial (EC 6.3.4.3) (Formyltetrahydrofolate synthetase)	2.97752	3.51148
Q04750	Top1 Top-1	DNA topoisomerase 1 (EC 5.6.2.1) (DNA topoisomerase I)	3.20293	3.50696
Q8CGC7	Eprs1 Eprs Qprs	Bifunctional glutamate/proline--tRNA ligase (Bifunctional aminoacyl-tRNA synthetase) [Includes: Glutamate--tRNA ligase (EC 6.1.1.17) (Glutamyl-tRNA synthetase) (GluRS); Proline--tRNA ligase (EC 6.1.1.15) (Prolyl-tRNA synthetase) (ProRS)]	2.43933	3.50197
P97355	Sms	Spermine synthase (SPMSY) (EC 2.5.1.22) (Spermidine aminopropyltransferase)		3.47984
Q99LC5	Etfa	Electron transfer flavoprotein subunit alpha, mitochondrial (Alpha-ETF)		3.47477
P97494	Gclc Glclc	Glutamate--cysteine ligase catalytic subunit (EC 6.3.2.2) (GCS heavy chain) (Gamma-ECS) (Gamma-glutamylcysteine synthetase)	1.82714	3.46915
Q3TW96	Uap1l1	UDP-N-acetylhexosamine pyrophosphorylase-like protein 1 (EC 2.7.7.-)	3.0104	3.46856
P62315	Snrpd1	Small nuclear ribonucleoprotein Sm D1 (Sm-D1) (Sm-D autoantigen) (snRNP core protein D1)		3.44982
Q6IRU2	Tpm4	Tropomyosin alpha-4 chain (Tropomyosin-4)		3.4128
P19096	Fasn	Fatty acid synthase (EC 2.3.1.85) (Type I Fatty Acid Synthase) [Includes: [Acyl-carrier-protein] S-acetyltransferase (EC 2.3.1.38); [Acyl-carrier-protein] S-malonyltransferase (EC 2.3.1.39); 3-oxoacyl-[acyl-carrier-protein] synthase (EC 2.3.1.41); 3-oxoacyl-[acyl-carrier-protein] reductase (EC 1.1.1.100); 3-hydroxyacyl-[acyl-carrier-protein] dehydratase (EC 4.2.1.59); Enoyl-[acyl-carrier-protein]…	1.38479	3.36733
Q60972	Rbbp4 Rbap48	Histone-binding protein RBBP4 (Chromatin assembly factor 1 subunit C) (CAF-1 subunit C) (Chromatin assembly factor I p48 subunit) (CAF-I 48 kDa subunit) (CAF-I p48) (Nucleosome-remodeling factor subunit RBAP48) (Retinoblastoma-binding protein 4) (RBBP-4) (Retinoblastoma-binding protein p48)		3.36096
Q8BFR5	Tufm	Elongation factor Tu, mitochondrial		3.34787
Q9JLT4	Txnrd2 Trxr2	Thioredoxin reductase 2, mitochondrial (EC 1.8.1.9) (Thioredoxin reductase TR3)	2.3876	3.34498
Q9CQC6	Bzw1	Basic leucine zipper and W2 domain-containing protein 1		3.34237
Q6NVF9	Cpsf6	Cleavage and polyadenylation specificity factor subunit 6		3.32262
Q99LP6	Grpel1	GrpE protein homolog 1, mitochondrial (Mt-GrpE#1)		3.30614
Q9QYI3	Dnajc7 Ttc2	DnaJ homolog subfamily C member 7 (Cytoplasmic CAR retention protein) (CCRP) (MDj11) (Tetratricopeptide repeat protein 2) (TPR repeat protein 2)		3.29815
Q9CZD3	Gars1 Gars	Glycine--tRNA ligase (EC 6.1.1.14) (Diadenosine tetraphosphate synthetase) (Ap4A synthetase) (EC 2.7.7.-) (Glycyl-tRNA synthetase 1) (GlyRS)		3.27398
Q61699	Hsph1 Hsp105 Hsp110 Kiaa0201	Heat shock protein 105 kDa (42 degrees C-HSP) (Heat shock 110 kDa protein) (Heat shock-related 100 kDa protein E7I) (HSP-E7I)		3.26784
P11152	Lpl	Lipoprotein lipase (LPL) (EC 3.1.1.34) (Phospholipase A1) (EC 3.1.1.32)	2.46657	3.24938
Q9D6R2	Idh3a	Isocitrate dehydrogenase [NAD] subunit alpha, mitochondrial (EC 1.1.1.41) (Isocitric dehydrogenase subunit alpha) (NAD(+)-specific ICDH subunit alpha)		3.24776
Q8R1F1	Niban2 Fam129b	Protein Niban 2 (Meg-3) (Niban-like protein 1) (Protein FAM129B)	3.05331	3.24347
P63028	Tpt1 Trt	Translationally-controlled tumor protein (TCTP) (21 kDa polypeptide) (p21) (p23)	2.15596	3.22566
Q7TNC4	Luc7l2	Putative RNA-binding protein Luc7-like 2 (CGI-74 homolog)	1.5535	3.14996
Q9DBD5	Pelp1 Mnar	Proline-, glutamic acid- and leucine-rich protein 1 (Modulator of non-genomic activity of estrogen receptor)		3.10397
Q99MD9	Nasp	Nuclear autoantigenic sperm protein (NASP)	1.3511	3.09878
Q8CCS6	Pabpn1 Pab2 Pabp2	Polyadenylate-binding protein 2 (PABP-2) (Poly(A)-binding protein 2) (Nuclear poly(A)-binding protein 1) (Poly(A)-binding protein II) (PABII) (Polyadenylate-binding nuclear protein 1)	2.114	3.08901
P17742	Ppia	Peptidyl-prolyl cis-trans isomerase A (PPIase A) (EC 5.2.1.8) (Cyclophilin A) (Cyclosporin A-binding protein) (Rotamase A) (SP18) [Cleaved into: Peptidyl-prolyl cis-trans isomerase A, N-terminally processed]	2.12221	3.08334
Q78ZA7	Nap1l4	Nucleosome assembly protein 1-like 4	3.06879	3.0731
Q99M31	Hspa14 Hsp70-4	Heat shock 70 kDa protein 14 (NST-1) (hsr.1)	2.09753	3.04917
Q9CQN1	Trap1 Hsp75	Heat shock protein 75 kDa, mitochondrial (HSP 75) (TNFR-associated protein 1) (Tumor necrosis factor type 1 receptor-associated protein) (TRAP-1)	1.65184	3.04917
Q3TXS7	Psmd1	26S proteasome non-ATPase regulatory subunit 1 (26S proteasome regulatory subunit RPN2) (26S proteasome regulatory subunit S1)		3.04681
P14869	Rplp0 Arbp	60S acidic ribosomal protein P0 (60S ribosomal protein L10E)	2.71474	3.03746
P17225	Ptbp1 Ptb	Polypyrimidine tract-binding protein 1 (PTB) (Heterogeneous nuclear ribonucleoprotein I) (hnRNP I)	1.40238	3.02353
Q99LF4	Rtcb D10Wsu52e	RNA-splicing ligase RtcB homolog (EC 6.5.1.8) (3'-phosphate/5'-hydroxy nucleic acid ligase) (Focal adhesion-associated protein) (FAAP)		3.02273
Q9D8C4	Ifi35 Ifp35	Interferon-induced 35 kDa protein homolog (IFP 35) (Ifi-35)		3.02136
Q91VH2	Snx9	Sorting nexin-9		3.01052
Q8CI94	Pygb	Glycogen phosphorylase, brain form (EC 2.4.1.1)	2.23628	3.0045
P14152	Mdh1 Mor2	Malate dehydrogenase, cytoplasmic (EC 1.1.1.37) (Cytosolic malate dehydrogenase)	2.63633	2.99147
Q922D8	Mthfd1	C-1-tetrahydrofolate synthase, cytoplasmic (C1-THF synthase) [Cleaved into: C-1-tetrahydrofolate synthase, cytoplasmic, N-terminally processed] [Includes: Methylenetetrahydrofolate dehydrogenase (EC 1.5.1.5); Methenyltetrahydrofolate cyclohydrolase (EC 3.5.4.9); Formyltetrahydrofolate synthetase (EC 6.3.4.3)]	2.25972	2.97785
P26638	Sars1 Sars Sers	Serine--tRNA ligase, cytoplasmic (EC 6.1.1.11) (Seryl-tRNA synthetase) (SerRS) (Seryl-tRNA(Ser/Sec) synthetase)		2.97044
Q52KI8	Srrm1 Pop101	Serine/arginine repetitive matrix protein 1 (Plenty-of-prolines 101)		2.95689
P08003	Pdia4 Cai Erp72	Protein disulfide-isomerase A4 (EC 5.3.4.1) (Endoplasmic reticulum resident protein 72) (ER protein 72) (ERp-72) (ERp72)	3.2881	2.95591
Q91VI7	Rnh1 Rnh	Ribonuclease inhibitor (Ribonuclease/angiogenin inhibitor 1)		2.9481
Q8BNV1	Trmt2a Htf9-c Htf9c	tRNA (uracil-5-)-methyltransferase homolog A (EC 2.1.1.-) (HpaII tiny fragments locus 9c protein)	2.32527	2.94475
Q8VIJ6	Sfpq Psf	Splicing factor, proline- and glutamine-rich (DNA-binding p52/p100 complex, 100 kDa subunit) (Polypyrimidine tract-binding protein-associated-splicing factor) (PSF) (PTB-associated-splicing factor)		2.9229
Q9QZE5	Copg1 Copg	Coatomer subunit gamma-1 (Gamma-1-coat protein) (Gamma-1-COP)		2.91194
P99024	Tubb5	Tubulin beta-5 chain	1.92993	2.90039
Q9JIF7	Copb1 Copb	Coatomer subunit beta (Beta-coat protein) (Beta-COP)		2.86876
P57759	Erp29	Endoplasmic reticulum resident protein 29 (ERp29)	1.56026	2.86409
Q9CPU0	Glo1	Lactoylglutathione lyase (EC 4.4.1.5) (Aldoketomutase) (Glyoxalase I) (Glx I) (Ketone-aldehyde mutase) (Methylglyoxalase) (S-D-lactoylglutathione methylglyoxal lyase)	4.97347	2.84929
Q9D051	Pdhb	Pyruvate dehydrogenase E1 component subunit beta, mitochondrial (PDHE1-B) (EC 1.2.4.1)		2.84678
P42227	Stat3 Aprf	Signal transducer and activator of transcription 3 (Acute-phase response factor)	2.44304	2.84128
P29341	Pabpc1 Pabp1	Polyadenylate-binding protein 1 (PABP-1) (Poly(A)-binding protein 1)		2.79576
P27773	Pdia3 Erp Erp60 Grp58	Protein disulfide-isomerase A3 (EC 5.3.4.1) (58 kDa glucose-regulated protein) (58 kDa microsomal protein) (p58) (Disulfide isomerase ER-60) (Endoplasmic reticulum resident protein 57) (ER protein 57) (ERp57) (Endoplasmic reticulum resident protein 60) (ER protein 60) (ERp60)	1.77944	2.7878
Q9QUR7	Pin1	Peptidyl-prolyl cis-trans isomerase NIMA-interacting 1 (EC 5.2.1.8) (Peptidyl-prolyl cis-trans isomerase Pin1) (PPIase Pin1)		2.78267
P61161	Actr2 Arp2	Actin-related protein 2 (Actin-like protein 2)		2.782
Q9Z2X1	Hnrnpf Hnrpf	Heterogeneous nuclear ribonucleoprotein F (hnRNP F) [Cleaved into: Heterogeneous nuclear ribonucleoprotein F, N-terminally processed]	2.54306	2.7761
Q62167	Ddx3x D1Pas1-rs2 Ddx3 Dead3 Erh	ATP-dependent RNA helicase DDX3X (EC 3.6.4.13) (D1Pas1-related sequence 2) (DEAD box RNA helicase DEAD3) (mDEAD3) (DEAD box protein 3, X-chromosomal) (Embryonic RNA helicase)		2.77383
Q8BG05	Hnrnpa3 Hnrpa3	Heterogeneous nuclear ribonucleoprotein A3 (hnRNP A3)		2.75981
P07356	Anxa2 Anx2 Cal1h	Annexin A2 (Annexin II) (Annexin-2) (Calpactin I heavy chain) (Calpactin-1 heavy chain) (Chromobindin-8) (Lipocortin II) (Placental anticoagulant protein IV) (PAP-IV) (Protein I) (p36)		2.75879
Q8BWZ3	Naa25 Mdm20	N-alpha-acetyltransferase 25, NatB auxiliary subunit (Mitochondrial distribution and morphology protein 20) (N-terminal acetyltransferase B complex subunit MDM20) (NatB complex subunit MDM20) (N-terminal acetyltransferase B complex subunit NAA25)	1.89715	2.73557
O35887	Calu	Calumenin (Crocalbin)		2.72607
Q9EQP2	Ehd4 Past2	EH domain-containing protein 4 (PAST homolog 2) (mPAST2)	2.36637	2.72557
P46471	Psmc2 Mss1	26S proteasome regulatory subunit 7 (26S proteasome AAA-ATPase subunit RPT1) (Proteasome 26S subunit ATPase 2) (Protein MSS1)		2.72208
Q60780	Gas7	Growth arrest-specific protein 7 (GAS-7)	2.17737	2.71312
P56959	Fus	RNA-binding protein FUS (Protein pigpen)		2.7073
Q62426	Cstb Cst6 Stfb	Cystatin-B (Stefin-B)	1.6719	2.70526
P48036	Anxa5 Anx5	Annexin A5 (Anchorin CII) (Annexin V) (Annexin-5) (Calphobindin I) (CBP-I) (Endonexin II) (Lipocortin V) (Placental anticoagulant protein 4) (PP4) (Placental anticoagulant protein I) (PAP-I) (Thromboplastin inhibitor) (Vascular anticoagulant-alpha) (VAC-alpha)		2.6846
P12265	Gusb Gus Gus-s	Beta-glucuronidase (EC 3.2.1.31)		2.67261
Q91YT7	Ythdf2	YTH domain-containing family protein 2		2.67065
Q61584	Fxr1 Fxr1h	Fragile X mental retardation syndrome-related protein 1 (mFxr1p)		2.67054
Q9ESP1	Sdf2l1	Stromal cell-derived factor 2-like protein 1 (SDF2-like protein 1)		2.66661
Q99KQ4	Nampt Pbef1	Nicotinamide phosphoribosyltransferase (NAmPRTase) (Nampt) (EC 2.4.2.12) (Pre-B-cell colony-enhancing factor 1 homolog) (PBEF) (Visfatin)		2.66446
Q99P91	Gpnmb Dchil Hgfin Nmb	Transmembrane glycoprotein NMB (DC-HIL) (Dendritic cell-associated transmembrane protein) (Osteoactivin)	1.97019	2.66214
P26039	Tln1 Tln	Talin-1	5.08782	2.65712
Q8K0C9	Gmds	GDP-mannose 4,6 dehydratase (EC 4.2.1.47) (GDP-D-mannose dehydratase) (GMD)		2.65457
O08529	Capn2	Calpain-2 catalytic subunit (EC 3.4.22.53) (80 kDa M-calpain subunit) (CALP80) (Calcium-activated neutral proteinase 2) (CANP 2) (Calpain M-type) (Calpain-2 large subunit) (Millimolar-calpain) (M-calpain)		2.64953
Q76MZ3	Ppp2r1a	Serine/threonine-protein phosphatase 2A 65 kDa regulatory subunit A alpha isoform (PP2A subunit A isoform PR65-alpha) (PP2A subunit A isoform R1-alpha)	1.77676	2.63708
Q61753	Phgdh	D-3-phosphoglycerate dehydrogenase (3-PGDH) (EC 1.1.1.95) (A10)	2.27396	2.63066
Q8K1R3	Pnpt1 Pnpase	Polyribonucleotide nucleotidyltransferase 1, mitochondrial (EC 2.7.7.8) (3'-5' RNA exonuclease OLD35) (PNPase old-35) (Polynucleotide phosphorylase 1) (PNPase 1) (Polynucleotide phosphorylase-like protein)	1.43137	2.62235
Q9CPY7	Lap3 Lapep	Cytosol aminopeptidase (EC 3.4.11.1) (Cysteinylglycine-S-conjugate dipeptidase) (EC 3.4.13.23) (Leucine aminopeptidase 3) (LAP-3) (Leucyl aminopeptidase) (Peptidase S) (Proline aminopeptidase) (EC 3.4.11.5) (Prolyl aminopeptidase)		2.59603
Q5SSZ5	Tns3 Tens1	Tensin-3 (Tensin-like SH2 domain-containing protein 1)		2.5891
Q9D0R2	Tars1 Tars	Threonine--tRNA ligase 1, cytoplasmic (EC 6.1.1.3) (Threonine--tRNA ligase, cytoplasmic) (Threonyl-tRNA synthetase) (ThrRS) (Threonyl-tRNA synthetase 1)		2.57857
P80313	Cct7 Ccth	T-complex protein 1 subunit eta (TCP-1-eta) (CCT-eta)	1.68078	2.57457
B2RQC6	Cad	CAD protein [Includes: Glutamine-dependent carbamoyl-phosphate synthase (EC 6.3.5.5); Aspartate carbamoyltransferase (EC 2.1.3.2); Dihydroorotase (EC 3.5.2.3)]		2.57418
Q8BJ71	Nup93 Cip4 Kiaa0095	Nuclear pore complex protein Nup93 (93 kDa nucleoporin) (CBP-interacting protein 4) (Nucleoporin Nup93)		2.57393
P29351	Ptpn6 Hcp Hcph Ptp1C	Tyrosine-protein phosphatase non-receptor type 6 (EC 3.1.3.48) (70Z-SHP) (Hematopoietic cell protein-tyrosine phosphatase) (PTPTY-42) (Protein-tyrosine phosphatase 1C) (PTP-1C) (SH-PTP1) (SHP-1)	3.78246	2.54586
Q9JHJ0	Tmod3	Tropomodulin-3 (Ubiquitous tropomodulin) (U-Tmod)		2.53319
Q9CPR4	Rpl17	60S ribosomal protein L17		2.51985
Q64337	Sqstm1 A170 STAP	Sequestosome-1 (STONE14) (Ubiquitin-binding protein p62)		2.50293
Q7TMK9	Syncrip Hnrpq Nsap1 Nsap1l	Heterogeneous nuclear ribonucleoprotein Q (hnRNP Q) (Glycine- and tyrosine-rich RNA-binding protein) (GRY-RBP) (NS1-associated protein 1) (Synaptotagmin-binding, cytoplasmic RNA-interacting protein) (pp68)		2.49372
Q9WVK4	Ehd1 Past1	EH domain-containing protein 1 (PAST homolog 1) (mPAST1)	3.78334	2.48445
Q9WV32	Arpc1b	Actin-related protein 2/3 complex subunit 1B (Arp2/3 complex 41 kDa subunit) (p41-ARC)		2.4691
Q60973	Rbbp7 Rbap46	Histone-binding protein RBBP7 (Histone acetyltransferase type B subunit 2) (Nucleosome-remodeling factor subunit RBAP46) (Retinoblastoma-binding protein 7) (RBBP-7) (Retinoblastoma-binding protein p46)		2.4612
P17918	Pcna	Proliferating cell nuclear antigen (PCNA) (Cyclin)	2.87441	2.4553
Q922R8	Pdia6 Txndc7	Protein disulfide-isomerase A6 (EC 5.3.4.1) (Thioredoxin domain-containing protein 7)		2.45365
P97311	Mcm6 Mcmd6 Mis5	DNA replication licensing factor MCM6 (EC 3.6.4.12) (Mis5 homolog)		2.45258
P06745	Gpi Gpi1	Glucose-6-phosphate isomerase (GPI) (EC 5.3.1.9) (Autocrine motility factor) (AMF) (Neuroleukin) (NLK) (Phosphoglucose isomerase) (PGI) (Phosphohexose isomerase) (PHI)	2.23612	2.41168
P50580	Pa2g4 Ebp1 Plfap	Proliferation-associated protein 2G4 (IRES-specific cellular trans-acting factor 45 kDa) (ITAF45) (Mpp1) (Proliferation-associated protein 1) (Protein p38-2G4)		2.4073
Q9JHU4	Dync1h1 Dhc1 Dnch1 Dnchc1 Dyhc	Cytoplasmic dynein 1 heavy chain 1 (Cytoplasmic dynein heavy chain 1) (Dynein heavy chain, cytosolic)		2.40029
Q64345	Ifit3 Garg49 Ifi49 Isg49	Interferon-induced protein with tetratricopeptide repeats 3 (IFIT-3) (Glucocorticoid-attenuated response gene 49 protein) (GARG-49) (P49) (IRG2)		2.39928
P62334	Psmc6 Sug2	26S proteasome regulatory subunit 10B (26S proteasome AAA-ATPase subunit RPT4) (Proteasome 26S subunit ATPase 6) (Proteasome subunit p42)		2.39266
Q9Z1Q9	Vars1 Bat6 G7a Vars Vars2	Valine--tRNA ligase (EC 6.1.1.9) (Protein G7a) (Valyl-tRNA synthetase) (ValRS)	2.17182	2.38966
Q99K51	Pls3	Plastin-3 (T-plastin)		2.38438
Q8BP92	Rcn2	Reticulocalbin-2 (Taipoxin-associated calcium-binding protein 49) (TCBP-49)		2.36468
E9PVX6	Mki67	Proliferation marker protein Ki-67 (Antigen identified by monoclonal antibody Ki-67 homolog) (Antigen KI-67 homolog) (Antigen Ki67 homolog)	2.72053	2.35881
Q9Z179	Shcbp1 Pal	SHC SH2 domain-binding protein 1 (Protein expressed in activated lymphocytes) (mPAL) (SHC-binding protein)	2.86733	2.32266
P09405	Ncl Nuc	Nucleolin (Protein C23)	2.74602	2.31674
Q8CHW4	Eif2b5	Translation initiation factor eIF-2B subunit epsilon (eIF-2B GDP-GTP exchange factor subunit epsilon)		2.28239
Q922K7	Nop2 Nol1	Probable 28S rRNA (cytosine-C(5))-methyltransferase (EC 2.1.1.-) (Nucleolar protein 1) (Nucleolar protein 2 homolog) (Proliferating-cell nucleolar antigen p120) (Proliferation-associated nucleolar protein p120)		2.26833
Q60715	P4ha1	Prolyl 4-hydroxylase subunit alpha-1 (4-PH alpha-1) (EC 1.14.11.2) (Procollagen-proline,2-oxoglutarate-4-dioxygenase subunit alpha-1)		2.21586
P38647	Hspa9 Grp75 Hsp74 Hspa9a	Stress-70 protein, mitochondrial (75 kDa glucose-regulated protein) (GRP-75) (Heat shock 70 kDa protein 9) (Mortalin) (Peptide-binding protein 74) (PBP74) (p66 MOT)		2.21163
Q8CHH9	Septin8 Kiaa0202 Sept8	Septin-8		2.19776
Q9CW03	Smc3 Bam Bmh Cspg6 Mmip1 Smc3l1 Smcd	Structural maintenance of chromosomes protein 3 (SMC protein 3) (SMC-3) (Basement membrane-associated chondroitin proteoglycan) (Bamacan) (Chondroitin sulfate proteoglycan 6) (Chromosome segregation protein SmcD) (Mad member-interacting protein 1)	4.57507	2.1703
P08905	Lyz2 Lyz Lyzs	Lysozyme C-2 (EC 3.2.1.17) (1,4-beta-N-acetylmuramidase C) (Lysozyme C type M)	2.90542	2.1044
P59325	Eif5	Eukaryotic translation initiation factor 5 (eIF-5)		2.02863
P06151	Ldha Ldh-1 Ldh1	L-lactate dehydrogenase A chain (LDH-A) (EC 1.1.1.27) (LDH muscle subunit) (LDH-M)		1.99688
P11983	Tcp1 Cct1 Ccta	T-complex protein 1 subunit alpha (TCP-1-alpha) (CCT-alpha) (Tailless complex polypeptide 1A) (TCP-1-A) (Tailless complex polypeptide 1B) (TCP-1-B)	2.62767	1.99161
P56399	Usp5 Isot	Ubiquitin carboxyl-terminal hydrolase 5 (EC 3.4.19.12) (Deubiquitinating enzyme 5) (Isopeptidase T) (Ubiquitin thioesterase 5) (Ubiquitin-specific-processing protease 5)	2.56398	1.94209
Q9Z1Z2	Strap Unrip	Serine-threonine kinase receptor-associated protein (UNR-interacting protein)	2.88074	1.90327
Q61207	Psap Sgp1	Prosaposin (Sulfated glycoprotein 1) (SGP-1) [Cleaved into: Saposin-A; Saposin-B-Val; Saposin-B; Saposin-C; Saposin-D]	3.08493	1.82774
Q11011	Npepps Psa	Puromycin-sensitive aminopeptidase (PSA) (EC 3.4.11.14) (Cytosol alanyl aminopeptidase) (AAP-S)	2.48951	1.7531
Q99L47	St13 Fam10a1 Hip	Hsc70-interacting protein (Hip) (Protein FAM10A1) (Protein ST13 homolog)		1.73016
Q91Z38	Ttc1	Tetratricopeptide repeat protein 1 (TPR repeat protein 1)		1.66131
O70251	Eef1b Eef1b2	Elongation factor 1-beta (EF-1-beta)	2.16087	1.45688
Q61599	Arhgdib Gdid4	Rho GDP-dissociation inhibitor 2 (Rho GDI 2) (D4) (Rho-GDI beta)		1.42223
Q04447	Ckb Ckbb	Creatine kinase B-type (EC 2.7.3.2) (B-CK) (Creatine kinase B chain) (Creatine phosphokinase B-type) (CPK-B)	1.52133	1.34052

## Sheet: Significant LiP Peptide (12h) 
Table S3 The list of LiP-peptide significantly changed in 12h LPS treatment
Uniprot Protein Accession	Genes	Peptide Sequence	start	end	12h(ratio)	12h(p.adjust)	sig
P63038	Hspd1 Hsp60	AVDAVIAELK	147	156	1.02876	0.000916217	Up
P99029	Prdx5 Prdx6	GVLFGVPGAFTPG	83	95	1.17909	0.00142752	Up
P98078	Dab2 Doc2	GVDQMDLF	209	216	1.15188	0.00148205	Up
Q9CY58	Serbp1 Pairbp1	LEINFGDLGR	354	363	1.06247	0.00148205	Up
P63038	Hspd1 Hsp60	DELEIIEGMK	209	218	1.06583	0.00181023	Up
Q8C3J5	Dock2	MWEEAISL	1292	1299	0.809511	0.00218543	Down
P99027	Rplp2	KEESEESDDDMGFGL	99	113	1.08678	0.0025825	Up
Q04750	Top1 Top-1	IMPEDIIINC	379	388	1.09286	0.00414067	Up
P20029	Hspa5 Grp78	EEEDKKEDVGTVVGIDLGTTYSCVGVFK	20	47	1.07747	0.00493907	Up
P58252	Eef2	LMEPIYLVEI	740	749	1.15691	0.0054256	Up
Q8R1F1	Niban2 Fam129b	EAGVEPPSPASPDSVTELR	640	658	1.15816	0.00547038	Up
O70370	Ctss Cats	GGIEADASYPYK	205	216	0.753934	0.00585587	Down
Q91ZX7	Lrp1 A2mr	GVGSFLLYSV	1889	1898	0.786391	0.00585587	Down
P20029	Hspa5 Grp78	EPTAAAIAYGLDKR	202	215	1.07628	0.00585587	Up
P10126	Eef1a1 Eef1a	SGDAAIVDMVPGKPM	396	410	0.897711	0.00599362	Down
Q99MR6	Srrt Ars2 Asr2	EIDLGVPPPIMK	139	150	0.883992	0.00599362	Down
P18242	Ctsd	GYLSQDTVSVPCK	149	161	1.1518	0.00599826	Up
Q9CW03	Smc3 Bam Bmh Cspg6 Mmip1 Smc3l1 Smcd	LHTLEEEKEELAQYQ	200	214	0.758547	0.00617081	Down
Q9JMH6	Txnrd1 Trxr1	SDDLFSLPYCPGK	294	306	1.11963	0.00715248	Up
P40142	Tkt	STVFYPSDGVATEK	443	456	1.15211	0.00796157	Up
P80316	Cct5 Ccte Kiaa0098	ALSENSGMNPIQTMTEVR	461	478	0.685117	0.00822603	Down
P62774	Mtpn Gcdp	GDLDEVKDYVAK	13	24	0.90629	0.00861476	Down
O88487	Dync1i2 Dnci2 Dncic2	VQEESDLEKK	47	56	1.06202	0.00861476	Up
P62259	Ywhae	KAAFDDAIAELDTL	196	209	1.08602	0.00861476	Up
P62259	Ywhae	DILDVLDK	99	106	1.31547	0.00895075	Up
Q9CYR0	Ssbp1	ESEVASSLVLER	17	28	1.15864	0.0092708	Up
Q9D8B3	Chmp4b	KKEEEDDDMKELENWAG	206	222	1.13352	0.0103508	Up
P17182	Eno1 Eno-1	VVGDDLTVTNPK	315	326	1.23428	0.0104052	Up
P20029	Hspa5 Grp78	DNHLLGTFDL	476	485	1.11067	0.0112959	Up
Q8BGD9	Eif4b	GNLPYDVTEDSIKDFFR	101	117	0.812951	0.0122822	Down
P58252	Eef2	LKDLEEDHACIPIK	558	571	1.07895	0.0122822	Up
P16858	Gapdh Gapd	AINDPFIDLNYM	30	41	0.803756	0.0126407	Down
P09671	Sod2 Sod-2	KHSLPDLPYDYGALEPH	25	41	1.07865	0.0126407	Up
P58252	Eef2	EESQVAGTPMFVVK	772	785	1.14606	0.0126407	Up
Q9Z110	Aldh18a1 P5cs Pycs	TAEFFLQ	706	712	0.899876	0.0147586	Down
P09103	P4hb Pdia1	GETYKDHENIIIAK	413	426	1.10508	0.0147586	Up
P62259	Ywhae	CDILDVLDK	98	106	1.06222	0.0147586	Up
Q80X90	Flnb	YIAQEPGNYEVSIK	2252	2265	1.09757	0.0147586	Up
Q99K48	Nono	GTPPAFNRPAPGAEFAPN	451	468	1.50677	0.0147586	Up
P58252	Eef2	KDLEEDHACIPIKK	559	572	1.09821	0.0150372	Up
P07091	S100a4 Capl Mts1	EEALDVIVST	6	15	0.914615	0.01606	Down
Q9WVK4	Ehd1 Past1	GPFGHGYGEGAGEGIDDVEWVVGK	420	443	1.45034	0.01606	Up
Q11011	Npepps Psa	LKPDLLDFTFEGK	68	80	0.926941	0.016801	Down
Q9CZU6	Cs	ASSTNLKDVLSNLIPK	28	43	1.25614	0.016801	Up
P17751	Tpi1 Tpi	AEGLGVIACIGEK	119	131	0.842733	0.0174835	Down
P58252	Eef2	FYELSENDLNFIKQ	78	91	1.29596	0.0174835	Up
P58252	Eef2	FYELSENDLNFIK	78	90	1.16437	0.0174835	Up
P99029	Prdx5 Prdx6	GDAIPSVEVFEGEPGK	55	70	1.25866	0.0174835	Up
Q3V3R1	Mthfd1l Fthfsdc1	EIIDEILK	138	145	1.71809	0.0174835	Up
Q8K1B8	Fermt3 Kind3 Urp2	GGSGNKPQGPEAPAEGLNPY	483	502	1.32881	0.0174835	Up
Q3TW96	Uap1l1	ADPVFIGF	263	270	1.42456	0.0175234	Up
P80317	Cct6a Cct6 Cctz Cctz1	GIDPFSLDAL	296	305	1.16029	0.018268	Up
Q03963	Eif2ak2 Pkr Prkr Tik	VLIDEKEFPEAK	44	55	1.13213	0.0186699	Up
P05063	Aldoc Aldo3 Scrg2	GVVPLAGTDGETTTQGLD	112	129	0.792353	0.0191748	Down
P17751	Tpi1 Tpi	APPTAYIDFAR	43	53	0.859273	0.0198457	Down
P16675	Ctsa Ppgb	APDQDEIDCLPGLAK	24	38	1.15166	0.0198457	Up
P08113	Hsp90b1 Grp94 Tra-1 Tra1	DAGTEEEEEETEKESTEKDEL	782	802	1.13645	0.0201412	Up
Q8BGD9	Eif4b	LGNLPYDVTEDSIKDFFR	100	117	0.748447	0.0201419	Down
P58252	Eef2	LLYEGPPDDEAAMGIK	371	386	1.14823	0.0201419	Up
P60843	Eif4a1 Ddx2a Eif4a	SIEEMPLNVA	394	403	1.18223	0.0201419	Up
Q8K1B8	Fermt3 Kind3 Urp2	GGSGNKPQGPEAPAEGLNPYGLVAPR	483	508	1.20866	0.0201419	Up
Q9CY58	Serbp1 Pairbp1	EETPEGEEHPVADTENKENEVEEVKEEGPK	256	285	1.0399	0.0201419	Up
P97494	Gclc Glclc	GLLSQGSPLSWEETQR	2	17	0.888286	0.0208015	Down
Q9D819	Ppa1 Pp Pyp	HDVPIYADKDVFHM	33	46	1.23963	0.021551	Up
P20029	Hspa5 Grp78	LTSNPENTVFDAK	85	97	1.11896	0.0218138	Up
P63017	Hspa8 Hsc70 Hsc73	SLESYAFNMK	541	550	1.13274	0.0218138	Up
Q78ZA7	Nap1l4	HFEPNDYFTNPVLTK	209	223	1.23947	0.0225305	Up
P17751	Tpi1 Tpi	ALAEGLGVIACIGEK	117	131	0.850712	0.0229409	Down
O70251	Eef1b Eef1b2	CVVEDDKVGTDMLEEQITAF	191	210	0.762759	0.0232413	Down
P16675	Ctsa Ppgb	SGLNIYNLYAPCAGGVPG	265	282	0.892406	0.0232413	Down
P17751	Tpi1 Tpi	VPAGTEVVCAPPTAYIDFAR	34	53	0.790895	0.0232413	Down
P19096	Fasn	LPESENLQEF	13	22	0.939419	0.0232413	Down
Q8BGD9	Eif4b	KPEENPASKF	578	587	0.834227	0.0232413	Down
Q9CPU0	Glo1	GFGHIGIAVPDVY	124	136	0.857446	0.0232413	Down
P47791	Gsr Gr1	SHPPIGTVGLTEDEAVHK	395	412	1.55801	0.0232413	Up
P63017	Hspa8 Hsc70 Hsc73	SINPDEAVAYGAAVQAAILSGDKSEN	362	387	1.1687	0.0232413	Up
P80317	Cct6a Cct6 Cctz Cctz1	KEMDRETLIDVAR	141	153	1.07328	0.0232413	Up
Q8C147	Dock8	ALYPPVDEEDAVEIRPVPECPK	241	262	1.2776	0.0232413	Up
Q9JLT4	Txnrd2 Trxr2	AIGDVAEGRPELTPTAIK	356	373	1.48411	0.0232413	Up
P10605	Ctsb	EDIDLPETF	76	84	1.50171	0.0236238	Up
P26039	Tln1 Tln	AVAAENEEIGAHIK	1904	1917	1.06986	0.0237547	Up
P11152	Lpl	LSPDDADFVDVLHTF	198	212	1.10763	0.0238116	Up
P07091	S100a4 Capl Mts1	ARPLEEALDVIVSTFHK	2	18	0.834224	0.0238746	Down
P31230	Aimp1 Emap2 Scye1	EIEELKQELILAEIHN	58	73	0.810168	0.024062	Down
P52480	Pkm Pk3 Pkm2 Pykm	AGKPVICATQMLES	320	333	0.920598	0.0243621	Down
P63028	Tpt1 Trt	GLCLEVEGK	26	34	1.09583	0.0256743	Up
Q58A65	Spag9 Jip4 Jsap2 Kiaa0516 Mapk8ip4	GEDLPLEPSVTK	1294	1305	1.19038	0.0256743	Up
P14869	Rplp0 Arbp	LQIGYPTVA	227	235	1.12344	0.0258583	Up
P18242	Ctsd	LVGPVEEVK	299	307	1.16448	0.0260282	Up
P58252	Eef2	GVQYLNEIKDSVVAGF	668	683	1.18655	0.0266016	Up
P17751	Tpi1 Tpi	VFGESDELIGQK	102	113	0.863198	0.0269227	Down
P14152	Mdh1 Mor2	ELTEEKETAFEFLS	319	332	1.30252	0.0270925	Up
P54987	Acod1 Irg1	EALAIAVSHAGAPIAN	186	201	1.33409	0.0270925	Up
P17182	Eno1 Eno-1	SAGIQVVGDDLTVTNPK	310	326	0.874639	0.0281287	Down
Q80X90	Flnb	ILFEEVHIPGSPFK	1111	1124	0.939233	0.0281287	Down
P10605	Ctsb	EDIDLPETFDAR	76	87	1.31296	0.0281287	Up
P17742	Ppia	VKEGMNIVEAM	132	142	1.12477	0.0281287	Up
P58252	Eef2	GPDGTGPNILTDITK	653	667	1.19204	0.0281287	Up
P58252	Eef2	WLPAGDALLQ	343	352	1.2546	0.0281287	Up
P80318	Cct3 Cctg	LDDMISTL	130	137	1.29892	0.0281287	Up
Q7TNC4	Luc7l2	SKEQDFFFEL	75	84	1.10375	0.0281287	Up
Q8CCS6	Pabpn1 Pab2 Pabp2	LALDESLFR	226	234	1.09377	0.0281287	Up
Q99MD9	Nasp	FTEYEKEIEELK	618	629	1.07174	0.0281287	Up
Q61207	Psap Sgp1	EICVLAGFCNEV	265	276	0.730076	0.0286651	Down
Q9EST5	Anp32b Pal31	IEGLTDEFVNL	34	44	1.13183	0.0286651	Up
Q99M31	Hspa14 Hsp70-4	LIHEPSAALLAY	169	180	0.74614	0.0286983	Down
Q8CI94	Pygb	LVTSIGDVVNHD	623	634	0.836516	0.0291767	Down
P08003	Pdia4 Cai Erp72	DNFDDVVNNADIILVE	178	193	0.920915	0.0297289	Down
P63038	Hspd1 Hsp60	NDELEIIEGM	208	217	0.886144	0.0297707	Down
Q922D8	Mthfd1	RIYGADDIELLPEAQNK	832	848	0.877357	0.0297707	Down
Q9CQN1	Trap1 Hsp75	STQAAEDKEEESLHSIISNTEAVR	61	84	1.07134	0.0299967	Up
Q8BNV1	Trmt2a Htf9-c Htf9c	AVAAPFDTVHIPEATK	261	276	0.83093	0.0301613	Down
P17918	Pcna	ATPLSPTVTLSM	218	229	0.828754	0.0308518	Down
P42227	Stat3 Aprf	EADPGSAAPYLK	696	707	1.34828	0.0309514	Up
P17225	Ptbp1 Ptb	IAIPGLAGAGNSVLLVS	324	340	0.930564	0.0309642	Down
Q8K0D5	Gfm1 Efg Efg1 Gfm	RYQPCSPSTQEELINK	719	734	0.925013	0.0310747	Down
Q9CPU0	Glo1	AFIQDPDGYWIEILNPNK	162	179	0.852316	0.0318535	Down
P63017	Hspa8 Hsc70 Hsc73	LDKNQTAEKEEFEHQQK	581	597	1.10191	0.0318535	Up
Q9Z2X1	Hnrnpf Hnrpf	VELESEDDVK	59	68	1.15924	0.0318535	Up
Q9Z179	Shcbp1 Pal	GLPDDIVIEK	407	416	1.20042	0.032532	Up
P53026	Rpl10a Nedd-6 Nedd6	DAFLASESLIK	108	118	0.843077	0.0327458	Down
P54775	Psmc4 Tbp7	EAVELPLTHF	179	188	1.11654	0.0327458	Up
P08905	Lyz2 Lyz Lyzs	GDQSTDYGIFQIN	66	78	0.721271	0.0329699	Down
P08003	Pdia4 Cai Erp72	IADEEDYATEVKDL	445	458	1.04657	0.0332156	Up
P40142	Tkt	FLPEAELLNLR	91	101	1.17389	0.034358	Up
P60766	Cdc42	SYPQTDVFLVC	71	81	1.20178	0.034358	Up
P80316	Cct5 Ccte Kiaa0098	AFADALEVIPM	450	460	1.36129	0.034358	Up
P99024	Tubb5	TVPELTQQVFDAK	285	297	1.18759	0.034358	Up
P58252	Eef2	ARPFPDGLAEDIDKGEVS	606	623	1.12797	0.0345485	Up
P80314	Cct2 Cctb	SLADSYLDEGFLLDKK	208	223	1.13493	0.0345485	Up
P17751	Tpi1 Tpi	ALAEGLGVIAC	117	127	0.880627	0.0349949	Down
Q9Z1Z2	Strap Unrip	VLPEEDSGELAKPK	306	319	1.07937	0.0351673	Up
Q9EQP2	Ehd4 Past2	SISIIDSPGIL	151	161	1.49303	0.0357448	Up
P09405	Ncl Nuc	KETLEEVFEK	500	509	1.25699	0.0358884	Up
E9PVX6	Mki67	EITQISDHSEKL	2866	2877	0.770245	0.0359751	Down
Q03963	Eif2ak2 Pkr Prkr Tik	AVDILDNENKVDCH	70	83	1.17494	0.0369105	Up
Q6PB66	Lrpprc Lrp130	VIEEQMEPALEKL	1223	1235	1.18504	0.0369105	Up
P57759	Erp29	YDALAGEFIK	163	172	1.16673	0.0372785	Up
Q04447	Ckb Ckbb	LRFPAEDEFPDLSSHN	12	27	1.17783	0.0374564	Up
P05064	Aldoa Aldo1	VNPCIGGVILFHE	70	82	0.649427	0.0379997	Down
P29351	Ptpn6 Hcp Hcph Ptp1C	SGDFYDLYGGEK	57	68	0.796977	0.0384357	Down
Q60780	Gas7	TVEPVDQLLR	385	394	0.91195	0.0385669	Down
Q03265	Atp5f1a Atp5a1	IAIDTIINQ	221	229	1.16637	0.0386098	Up
Q9JHK5	Plek	LPETIDLGALYLSMKDPEKG	120	139	1.15306	0.0390467	Up
P16858	Gapdh Gapd	SHSSTFDAGAGIAL	288	301	1.17927	0.0393147	Up
P27773	Pdia3 Erp Erp60 Grp58	RDLFSDGHSEFLK	161	173	1.08093	0.0393147	Up
Q61753	Phgdh	SLTGVVNAQALTSAFSPH	311	328	0.896088	0.0396655	Down
Q8CGC7	Eprs1 Eprs Qprs	KEENLAEWYSQ	1020	1030	1.16991	0.039963	Up
P42932	Cct8 Cctq	VSIFPDSGNFNVDNIR	188	203	1.18866	0.040024	Up
P54987	Acod1 Irg1	EALAIAVS	186	193	1.15084	0.040024	Up
Q8BWZ3	Naa25 Mdm20	AQEVAALEPTDDNSLQAL	68	85	1.23735	0.0401251	Up
P60122	Ruvbl1 Tip49 Tip49a	TEGINISEEALNHLGEIGTK	381	400	1.08967	0.040139	Up
P14211	Calr	DEAYAEEFGNETWGVTK	335	351	0.595906	0.0402846	Down
P27659	Rpl3	GQDEMIDVIGVTK	212	224	1.09918	0.0402846	Up
Q01853	Vcp	FDELDSIAK	576	584	1.0941	0.0402846	Up
P52480	Pkm Pk3 Pkm2 Pykm	MADTFLEHM	22	30	0.862206	0.0422044	Down
Q99P91	Gpnmb Dchil Hgfin Nmb	ATITIVEG	383	390	0.800882	0.0425313	Down
P62843	Rps15 Rig	DMIILPEMVGS	82	92	1.07894	0.0425313	Up
Q61024	Asns	EAQVQYPLQTF	276	286	1.16136	0.0425313	Up
Q62426	Cstb Cst6 Stfb	GAPSATMPATAETQEVADQVK	4	24	0.787059	0.0427346	Down
P11983	Tcp1 Cct1 Ccta	GVQVVITDPEK	249	259	1.35119	0.0428228	Up
P26039	Tln1 Tln	GNLPEFGDAIATASK	1417	1431	1.07694	0.0428228	Up
P97825	Jpt1 Hn1	EASSGDFLDLK	89	99	1.30724	0.0428228	Up
Q76MZ3	Ppp2r1a	SPSDLEAHFVPLVK	120	133	0.796182	0.0453665	Down
Q9D7B1	Dus2 Dus2l	AKTPEAVEEPAEDTSGIIK	336	354	1.08971	0.0459013	Up
P80317	Cct6a Cct6 Cctz Cctz1	SFDDLNPDCLGHAGLVYEYTLGEEK	335	359	0.861825	0.0460938	Down
P56399	Usp5 Isot	IGEWELIQ	304	311	0.763191	0.0461967	Down
P06745	Gpi Gpi1	ILLANFLAQ	424	432	1.22899	0.0461967	Up
P27659	Rpl3	GEVTNDFIML	324	333	1.09093	0.0461967	Up
P42932	Cct8 Cctq	AEAFEAIPR	442	450	1.06724	0.0461967	Up
P52480	Pkm Pk3 Pkm2 Pykm	AVDLPAVSEKDIQDLK	215	230	1.0924	0.0461967	Up
P62843	Rps15 Rig	GVDLDQLLDMSYEQL	19	33	1.13118	0.0461967	Up
Q9EST5	Anp32b Pal31	LAEELPSLTHL	83	93	1.16203	0.0461967	Up
Q8K1R3	Pnpt1 Pnpase	KLQAETGVTIS	630	640	0.866562	0.0481292	Down
Q9Z1Q9	Vars1 Bat6 G7a Vars Vars2	LLSPFMPF	1058	1065	0.813576	0.0489367	Down
P80313	Cct7 Ccth	VEEGLHPQIIIR	112	123	1.16043	0.0489367	Up
P80314	Cct2 Cctb	GGSLADSYLDEGFLLDK	206	222	1.14787	0.0489367	Up
P29351	Ptpn6 Hcp Hcph Ptp1C	WYHGHISGGQAESLLQ	110	125	0.804321	0.0492089	Down
P17751	Tpi1 Tpi	KELASQPDVDGF	219	230	0.889858	0.0492846	Down

## Sheet: Significant LiP Peptide (24h) 
Table S4 The list of LiP-peptide significantly changed in 24h LPS treatment
Uniprot Protein Accession	Genes	Peptide Sequence	start	end	24h(Ratio)	24h(p.adjust)	sig
P10126	Eef1a1 Eef1a	YAPVLDCHTAHIACK	357	371	0.584178	0.000916217	Down
P63038	Hspd1 Hsp60	AVDAVIAELK	147	156	0.786371	0.000916217	Down
P63038	Hspd1 Hsp60	GEEGLNLNLEDVQAHDLGK	326	344	0.772513	0.000930851	Down
P47955	Rplp1	KEESEESEDDMGFGL	98	112	0.544662	0.00125645	Down
P63038	Hspd1 Hsp60	GGAVFGEEGLNLNLEDVQAHDLGK	321	344	0.73953	0.00125645	Down
P99029	Prdx5 Prdx6	GVLFGVPGAFTPG	83	95	1.52342	0.00142752	Up
P98078	Dab2 Doc2	GVDQMDLF	209	216	1.38919	0.00148205	Up
Q9CY58	Serbp1 Pairbp1	LEINFGDLGR	354	363	1.14934	0.00148205	Up
P63038	Hspd1 Hsp60	EAVVTEIPKEEKDPGMGAM	543	561	0.760613	0.00148205	Down
P63038	Hspd1 Hsp60	DELEIIEGMK	209	218	1.28917	0.00181023	Up
Q8C3J5	Dock2	MWEEAISL	1292	1299	0.679266	0.00218543	Down
P99027	Rplp2	KEESEESDDDMGFGL	99	113	0.637651	0.0025825	Down
P26041	Msn	MVQEDLEK	451	458	1.22059	0.00309985	Up
P63038	Hspd1 Hsp60	GVDLLADAVAVTMGPK	43	58	0.719096	0.00374427	Down
Q04750	Top1 Top-1	IMPEDIIINC	379	388	0.89463	0.00414067	Down
P20029	Hspa5 Grp78	EEEDKKEDVGTVVGIDLGTTY	20	40	1.22767	0.00449598	Up
P20029	Hspa5 Grp78	EEEDKKEDVGTVVGIDLGTTYSCVGVFK	20	47	1.36058	0.00493907	Up
P58252	Eef2	LMEPIYLVEI	740	749	1.33029	0.0054256	Up
Q8R1F1	Niban2 Fam129b	EAGVEPPSPASPDSVTELR	640	658	0.828625	0.00547038	Down
P20029	Hspa5 Grp78	EPTAAAIAYGLDKR	202	215	1.32153	0.00585587	Up
O70370	Ctss Cats	GGIEADASYPYK	205	216	0.705477	0.00585587	Down
Q91ZX7	Lrp1 A2mr	GVGSFLLYSV	1889	1898	0.516217	0.00585587	Down
P10126	Eef1a1 Eef1a	SGDAAIVDMVPGKPM	396	410	1.31261	0.00599362	Up
P56480	Atp5f1b Atp5b	AIAELGIYPAVD	388	399	1.26391	0.00599362	Up
Q99MR6	Srrt Ars2 Asr2	EIDLGVPPPIMK	139	150	0.758609	0.00599362	Down
P18242	Ctsd	GYLSQDTVSVPCK	149	161	1.35055	0.00599826	Up
P63038	Hspd1 Hsp60	GYISPYFIN	222	230	1.3211	0.00599826	Up
Q03265	Atp5f1a Atp5a1	KTGTAEMSSILEER	45	58	1.31101	0.00599826	Up
P08113	Hsp90b1 Grp94 Tra-1 Tra1	EATEKEFEPLLNW	609	621	1.16423	0.00617081	Up
Q8BH95	Echs1	ASGANFQYIITEK	28	40	1.25079	0.00617081	Up
P56480	Atp5f1b Atp5b	GMDELSEEDKLTVS	442	455	0.925975	0.00617081	Down
Q9CW03	Smc3 Bam Bmh Cspg6 Mmip1 Smc3l1 Smcd	LHTLEEEKEELAQYQ	200	214	0.91224	0.00617081	Down
P63038	Hspd1 Hsp60	ALMLQGVDLLADAVAVTMGPKG	38	59	1.34175	0.00704958	Up
Q9JMH6	Txnrd1 Trxr1	SDDLFSLPYCPGK	294	306	1.36513	0.00715248	Up
P18760	Cfl1	WAPENAPLK	104	112	1.13616	0.00778454	Up
P08113	Hsp90b1 Grp94 Tra-1 Tra1	IKEDEDDKTVMDL	701	713	1.14962	0.00796157	Up
P40142	Tkt	STVFYPSDGVATEK	443	456	1.24157	0.00796157	Up
P51859	Hdgf Tdrm1	SDEEGKLVIDEPAK	133	146	1.11843	0.00796157	Up
Q61233	Lcp1 Pls2	VAPKGDEEGIPAVVIDMSGLR	306	326	1.15462	0.00822603	Up
P80316	Cct5 Ccte Kiaa0098	ALSENSGMNPIQTMTEVR	461	478	0.716351	0.00822603	Down
O88487	Dync1i2 Dnci2 Dncic2	VQEESDLEKK	47	56	1.18893	0.00861476	Up
P62259	Ywhae	KAAFDDAIAELDTL	196	209	1.19451	0.00861476	Up
P62774	Mtpn Gcdp	GDLDEVKDYVAK	13	24	0.716048	0.00861476	Down
P10126	Eef1a1 Eef1a	CVESFSDYPPLGR	411	423	1.41908	0.00895075	Up
P62259	Ywhae	DILDVLDK	99	106	1.29347	0.00895075	Up
Q05816	Fabp5 Fabpe Klbp Mal1	AKPDCIITCDGNNITVK	39	55	1.09851	0.00895075	Up
Q8CD92	Ttc27	ALEAELQDLSNQLR	831	844	0.770189	0.00895075	Down
Q9CYR0	Ssbp1	ESEVASSLVLER	17	28	1.52359	0.0092708	Up
P08113	Hsp90b1 Grp94 Tra-1 Tra1	RIKEDEDDKTVMDL	700	713	1.16396	0.00978738	Up
P63038	Hspd1 Hsp60	LNLEDVQAHDLGK	332	344	1.26238	0.0103508	Up
Q9D8B3	Chmp4b	KKEEEDDDMKELENWAG	206	222	1.47148	0.0103508	Up
P17182	Eno1 Eno-1	VVGDDLTVTNPK	315	326	1.27461	0.0104052	Up
P62889	Rpl30	TLAIIDPGDSDIIR	93	106	1.30717	0.0104052	Up
O70492	Snx3	GIFDDNFIEER	108	118	0.810639	0.0109465	Down
P63325	Rps10	DYLHLPPEIVPA	81	92	0.798612	0.0109465	Down
P20029	Hspa5 Grp78	DNHLLGTFDL	476	485	1.26251	0.0112959	Up
P58252	Eef2	LKDLEEDHACIPIKK	558	572	1.23767	0.0122822	Up
P58252	Eef2	LKDLEEDHACIPIK	558	571	1.23074	0.0122822	Up
P09103	P4hb Pdia1	LMSQEVPEDWDKQPVK	357	372	1.21374	0.0126407	Up
P09671	Sod2 Sod-2	KHSLPDLPYDYGALEPH	25	41	1.24191	0.0126407	Up
P58252	Eef2	EESQVAGTPMFVVK	772	785	1.21454	0.0126407	Up
P16858	Gapdh Gapd	AINDPFIDLNYM	30	41	0.617221	0.0126407	Down
P07901	Hsp90aa1 Hsp86 Hsp86-1 Hspca	KEGLELPEDEEEKKKQEEK	547	565	1.20473	0.0147586	Up
P62259	Ywhae	CDILDVLDK	98	106	1.19158	0.0147586	Up
Q6NVF9	Cpsf6	RTPLSEAEFEEIMNR	406	420	1.18512	0.0147586	Up
Q80X90	Flnb	YIAQEPGNYEVSIK	2252	2265	1.18255	0.0147586	Up
Q8VDD5	Myh9	SLKEEVGEEAIVELVENGKK	45	64	1.23355	0.0147586	Up
Q99K48	Nono	GTPPAFNRPAPGAEFAPN	451	468	1.62598	0.0147586	Up
P09103	P4hb Pdia1	GETYKDHENIIIAK	413	426	0.799072	0.0147586	Down
Q9Z110	Aldh18a1 P5cs Pycs	TAEFFLQ	706	712	0.820643	0.0147586	Down
P58252	Eef2	KDLEEDHACIPIKK	559	572	1.23017	0.0150372	Up
O70492	Snx3	LQDEIIDK	145	152	0.824103	0.0150372	Down
P67984	Rpl22	NFEQFLQER	38	46	1.14673	0.0157594	Up
Q9WVK4	Ehd1 Past1	GPFGHGYGEGAGEGIDDVEWVVGK	420	443	1.25949	0.01606	Up
P07091	S100a4 Capl Mts1	EEALDVIVST	6	15	0.747894	0.01606	Down
P26041	Msn	DDIYCPPETAVLLASYAVQSK	113	133	1.2346	0.0167139	Up
Q11011	Npepps Psa	LKPDLLDFTFEGK	68	80	1.05127	0.016801	Up
Q9CZU6	Cs	ASSTNLKDVLSNLIPK	28	43	1.73449	0.016801	Up
Q8BTM8	Flna Fln Fln1	GPVGVNVTYGGDHIPK	943	958	0.842565	0.016801	Down
P26040	Ezr Vil2	GTDLWLGVDAL	213	223	0.558658	0.0168516	Down
O35658	C1qbp Gc1qbp	AFVEFLTDEI	78	87	1.23469	0.0170325	Up
P10126	Eef1a1 Eef1a	FAPVNVTTEVK	280	290	1.35063	0.0173346	Up
O35887	Calu	ETMEDIDKNADGF	195	207	1.08293	0.0174835	Up
P58252	Eef2	FYELSENDLNFIKQ	78	91	1.35949	0.0174835	Up
P58252	Eef2	FYELSENDLNFIK	78	90	1.27293	0.0174835	Up
P99029	Prdx5 Prdx6	GDAIPSVEVFEGEPGK	55	70	1.44934	0.0174835	Up
Q02053	Uba1 Sbx Ube1 Ube1ax Ube1x	VVIPFLTESY	609	618	1.25845	0.0174835	Up
Q3V3R1	Mthfd1l Fthfsdc1	EIIDEILK	138	145	1.89822	0.0174835	Up
Q6IRU2	Tpm4	EKTIDDLEEK	214	223	1.16079	0.0174835	Up
Q8K1B8	Fermt3 Kind3 Urp2	GGSGNKPQGPEAPAEGLNPY	483	502	1.34641	0.0174835	Up
Q99LC5	Etfa	NVAPVSDIIEIK	128	139	1.14792	0.0174835	Up
Q9D6R2	Idh3a	KTFDLYANVRPC	116	127	1.25161	0.0174835	Up
Q9Z2U0	Psma7	ILNPEEIEKY	219	228	1.44206	0.0174835	Up
O88342	Wdr1	GPVTDVAYSHDGAFLAVC	490	507	0.749597	0.0174835	Down
P17751	Tpi1 Tpi	AEGLGVIACIGEK	119	131	0.79241	0.0174835	Down
Q8CGC7	Eprs1 Eprs Qprs	VLEDIQLN	1404	1411	0.75642	0.0174835	Down
Q9EQU5	Set	EQQEAIEHIDEVQNEIDRL	39	57	0.653152	0.0174835	Down
P18760	Cfl1	NIILEEGKEILVGDVGQTVDDPYTT	46	70	1.14094	0.0175234	Up
Q3TW96	Uap1l1	ADPVFIGF	263	270	1.51446	0.0175234	Up
Q8BFR5	Tufm	DLDKPFLLPVESVY	253	266	0.751115	0.0175234	Down
Q9QYI3	Dnajc7 Ttc2	EVGEAFTILSD	430	440	0.840404	0.0175234	Down
P80317	Cct6a Cct6 Cctz Cctz1	GIDPFSLDAL	296	305	1.1787	0.018268	Up
Q60972	Rbbp4 Rbap48	RLVLGTHTSDEQNHLVIA	65	82	0.695062	0.0183992	Down
Q9DBD5	Pelp1 Mnar	VQPEAEPEPGLLL	991	1003	0.527124	0.018511	Down
Q03963	Eif2ak2 Pkr Prkr Tik	VLIDEKEFPEAK	44	55	1.21978	0.0186699	Up
P08113	Hsp90b1 Grp94 Tra-1 Tra1	IKEDEDDKTVMDLA	701	714	1.16852	0.0191748	Up
P05063	Aldoc Aldo3 Scrg2	GVVPLAGTDGETTTQGLD	112	129	0.687755	0.0191748	Down
P16675	Ctsa Ppgb	APDQDEIDCLPGLAK	24	38	0.747011	0.0198457	Down
P17751	Tpi1 Tpi	APPTAYIDFAR	43	53	0.800072	0.0198457	Down
P97355	Sms	DIDEVVYDEDSPYQNIK	135	151	0.770018	0.0198457	Down
P08113	Hsp90b1 Grp94 Tra-1 Tra1	IKEDEDDKTVMDLA	701	714	1.19048	0.0201412	Up
P08113	Hsp90b1 Grp94 Tra-1 Tra1	DAGTEEEEEETEKESTEKDEL	782	802	1.28953	0.0201412	Up
P18760	Cfl1	NIILEEGKEILVG	46	58	1.29378	0.0201419	Up
P58252	Eef2	LLYEGPPDDEAAMGIK	371	386	1.2523	0.0201419	Up
P62315	Snrpd1	ILPDSLPLDTL	69	79	1.57435	0.0201419	Up
P80318	Cct3 Cctg	TAVETAVLLL	508	517	1.30946	0.0201419	Up
Q8K1B8	Fermt3 Kind3 Urp2	GGSGNKPQGPEAPAEGLNPYGLVAPR	483	508	1.35678	0.0201419	Up
Q99LP6	Grpel1	SVPKEEISNNNPHLK	124	138	1.17576	0.0201419	Up
Q9CY58	Serbp1 Pairbp1	EETPEGEEHPVADTENKENEVEEVKEEGPK	256	285	1.10566	0.0201419	Up
P97494	Gclc Glclc	GLLSQGSPLSWEETQR	2	17	0.766716	0.0208015	Down
Q9D819	Ppa1 Pp Pyp	HDVPIYADKDVFHM	33	46	1.1536	0.021551	Up
Q9CZD3	Gars1 Gars	FSFPAVVAPFK	595	605	0.683975	0.021551	Down
P20029	Hspa5 Grp78	LTSNPENTVFDAK	85	97	1.31386	0.0218138	Up
P63017	Hspa8 Hsc70 Hsc73	SLESYAFNMK	541	550	1.20911	0.0218138	Up
Q9CQC6	Bzw1	GLTETGTDLEAVAK	39	52	0.836377	0.0218138	Down
Q78ZA7	Nap1l4	HFEPNDYFTNPVLTK	209	223	1.23991	0.0225305	Up
P16675	Ctsa Ppgb	GLASYEQNDNSLVYF	202	216	0.52519	0.0229187	Down
P17751	Tpi1 Tpi	ALAEGLGVIACIGEK	117	131	0.804043	0.0229409	Down
O70251	Eef1b Eef1b2	CVVEDDKVGTDMLEEQITAF	191	210	1.16496	0.0232413	Up
P18242	Ctsd	NVLPVFDNL	208	216	1.26559	0.0232413	Up
P47791	Gsr Gr1	SHPPIGTVGLTEDEAVHK	395	412	1.70666	0.0232413	Up
P47791	Gsr Gr1	LDYDNIPTVVF	384	394	1.82338	0.0232413	Up
P63017	Hspa8 Hsc70 Hsc73	SINPDEAVAYGAAVQAAILSGDKSEN	362	387	1.27631	0.0232413	Up
P80317	Cct6a Cct6 Cctz Cctz1	KEMDRETLIDVAR	141	153	1.16966	0.0232413	Up
Q61699	Hsph1 Hsp105 Hsp110 Kiaa0201	YSDPQGVPYPEAK	446	458	1.21663	0.0232413	Up
Q9JLT4	Txnrd2 Trxr2	AIGDVAEGRPELTPTAIK	356	373	1.73327	0.0232413	Up
P10605	Ctsb	GIESEIVAGIPR	320	331	0.785836	0.0232413	Down
P16675	Ctsa Ppgb	SGLNIYNLYAPCAGGVPG	265	282	0.834492	0.0232413	Down
P17751	Tpi1 Tpi	VPAGTEVVCAPPTAYIDFAR	34	53	0.73008	0.0232413	Down
P19096	Fasn	LPESENLQEF	13	22	0.845642	0.0232413	Down
Q9CPU0	Glo1	GFGHIGIAVPDVY	124	136	0.874429	0.0232413	Down
Q02053	Uba1 Sbx Ube1 Ube1ax Ube1x	ECLPEDKEALTEEK	430	443	1.15329	0.0233119	Up
P10605	Ctsb	EDIDLPETF	76	84	1.68846	0.0236238	Up
P16858	Gapdh Gapd	AINDPFIDL	30	38	0.655742	0.0238101	Down
P11152	Lpl	LSPDDADFVDVLHTF	198	212	1.15111	0.0238116	Up
Q9QZE5	Copg1 Copg	LAAVPEFQGLGPLFK	617	631	1.21829	0.0238116	Up
P08113	Hsp90b1 Grp94 Tra-1 Tra1	IKEDEDDKTVMDL	701	713	1.15529	0.0238746	Up
P08249	Mdh2 Mor1	IIANPVNSTIPITAEVFKK	139	157	1.16061	0.0238746	Up
P29758	Oat	NVLGEYEEYITK	118	129	1.21578	0.0238746	Up
P07091	S100a4 Capl Mts1	ARPLEEALDVIVSTFHK	2	18	0.763313	0.0238746	Down
P63038	Hspd1 Hsp60	ALMLQGVDLLADAVAVTMGPKG	38	59	1.30614	0.024062	Up
P20029	Hspa5 Grp78	TKPYIQVDIGGGQ	125	137	1.31919	0.0241035	Up
P52480	Pkm Pk3 Pkm2 Pykm	AGKPVICATQMLES	320	333	0.884772	0.0243621	Down
P97807	Fh Fh1	ETAIELGYLTAE	481	492	1.22144	0.0246226	Up
P62259	Ywhae	ASDIAMTELPPTHPIR	155	170	0.659537	0.025533	Down
P07901	Hsp90aa1 Hsp86 Hsp86-1 Hspca	TNDWEEHLAVK	318	328	1.11382	0.0256743	Up
P63028	Tpt1 Trt	GLCLEVEGK	26	34	1.15383	0.0256743	Up
Q61233	Lcp1 Pls2	FIANLFNK	366	373	1.11339	0.0256743	Up
P14869	Rplp0 Arbp	LQIGYPTVA	227	235	1.14191	0.0258583	Up
P18760	Cfl1	NIILEEGKEILVGDVGQTVDD	46	66	1.2095	0.0258583	Up
P62192	Psmc1	SFVDKDLLEPGCSVL	137	151	1.20376	0.0258583	Up
Q9JKR6	Hyou1 Grp170	SLDRVESVFETL	552	563	1.25939	0.0258583	Up
P51859	Hdgf Tdrm1	GPPAEEEEGEEEAAKEEAEAQGVR	209	232	0.915426	0.0258583	Down
P63017	Hspa8 Hsc70 Hsc73	GPAVGIDLGTTY	4	15	0.813169	0.0258583	Down
P18242	Ctsd	LVGPVEEVK	299	307	1.27947	0.0260282	Up
O08529	Capn2	GFEDFTGGIA	203	212	0.780805	0.0261926	Down
P58252	Eef2	GVQYLNEIKDSVVAGF	668	683	1.1909	0.0266016	Up
P40124	Cap1 Cap	AQINQGESITHALK	258	271	1.17884	0.0267106	Up
Q52KI8	Srrm1 Pop101	ENIAGIPSAFLELK	114	127	1.30889	0.0267106	Up
P56480	Atp5f1b Atp5b	GMDELSEEDKLTVS	442	455	0.919865	0.0267106	Down
Q03265	Atp5f1a Atp5a1	LIIYDDLSK	308	316	0.822652	0.0267106	Down
P20029	Hspa5 Grp78	TLGIETVGGVMTK	424	436	1.32418	0.0269227	Up
P17751	Tpi1 Tpi	VFGESDELIGQK	102	113	0.815951	0.0269227	Down
P14152	Mdh1 Mor2	ELTEEKETAFEFLS	319	332	1.35301	0.0270925	Up
P54987	Acod1 Irg1	EALAIAVSHAGAPIAN	186	201	1.52276	0.0270925	Up
Q99LF4	Rtcb D10Wsu52e	NLDFQDVLDKL	442	452	1.13856	0.0270925	Up
Q9JKR6	Hyou1 Grp170	RFPEHELIVDPQR	119	131	0.715602	0.0270925	Down
Q9D8C4	Ifi35 Ifp35	GFADEEVAQHL	182	192	0.871479	0.0278109	Down
Q91YT7	Ythdf2	FLPDAMFGQPGAL	99	111	1.28514	0.0278579	Up
O35658	C1qbp Gc1qbp	FLTDEIKEEK	82	91	1.2171	0.0281287	Up
P08113	Hsp90b1 Grp94 Tra-1 Tra1	EATEKEFEPLLN	609	620	1.1202	0.0281287	Up
P08113	Hsp90b1 Grp94 Tra-1 Tra1	KEEKEESDDEAAVEEEEEEKKPK	300	322	1.21207	0.0281287	Up
P10605	Ctsb	EDIDLPETFDAR	76	87	1.49454	0.0281287	Up
P17742	Ppia	VKEGMNIVEAM	132	142	1.19169	0.0281287	Up
P26638	Sars1 Sars Sers	QFDEELYK	242	249	1.13491	0.0281287	Up
P29758	Oat	LEVLEEENLAENADK	337	351	1.09324	0.0281287	Up
P38647	Hspa9 Grp75 Hsp74 Hspa9a	SSGGLSKDDIENMVK	549	563	1.10399	0.0281287	Up
P58252	Eef2	WLPAGDALLQ	343	352	1.36548	0.0281287	Up
P80318	Cct3 Cctg	LDDMISTL	130	137	1.2349	0.0281287	Up
Q01853	Vcp	FFDELDSIAK	575	584	1.17831	0.0281287	Up
Q7TNC4	Luc7l2	SKEQDFFFEL	75	84	1.21925	0.0281287	Up
Q8BTM8	Flna Fln Fln1	KVGSAADIPINISETDLSLL	1964	1983	1.34777	0.0281287	Up
Q8CCS6	Pabpn1 Pab2 Pabp2	LALDESLFR	226	234	1.14498	0.0281287	Up
Q8K0D5	Gfm1 Efg Efg1 Gfm	EFSDETFGSNVPK	568	580	1.33283	0.0281287	Up
Q99MD9	Nasp	FTEYEKEIEELK	618	629	1.16662	0.0281287	Up
Q9D051	Pdhb	SRPVGHCLEAAAVLSK	243	258	1.20748	0.0281287	Up
Q3TXS7	Psmd1	AFEESLNYAL	73	82	0.619181	0.0281287	Down
Q62167	Ddx3x D1Pas1-rs2 Ddx3 Dead3 Erh	GLDQQFAGL	11	19	0.552238	0.0281287	Down
P20029	Hspa5 Grp78	VFDLGGGTF	223	231	1.27731	0.0286651	Up
Q9EST5	Anp32b Pal31	IEGLTDEFVNL	34	44	1.1676	0.0286651	Up
P52480	Pkm Pk3 Pkm2 Pykm	APITSDPTEAAAVGAVEASFK	402	422	0.788746	0.0286651	Down
Q61207	Psap Sgp1	EICVLAGFCNEV	265	276	0.84817	0.0286651	Down
Q91VH2	Snx9	GYQGETDLNDAITEAGK	453	469	0.802279	0.0286651	Down
Q99M31	Hspa14 Hsp70-4	LIHEPSAALLAY	169	180	0.611013	0.0286983	Down
Q9D8Y0	Efhd2 Sws1	SRFEEEIKAE	205	214	1.22335	0.0291767	Up
Q8CI94	Pygb	LVTSIGDVVNHD	623	634	0.769879	0.0291767	Down
Q9JIF7	Copb1 Copb	SIFGEDALANVS	899	910	0.757495	0.0291767	Down
P80317	Cct6a Cct6 Cctz Cctz1	AIDDGCVVPGAGAVEVA	401	417	0.809464	0.0295982	Down
Q922D8	Mthfd1	RIYGADDIELLPEAQNK	832	848	0.831182	0.0297707	Down
Q9CQN1	Trap1 Hsp75	STQAAEDKEEESLHSIISNTEAVR	61	84	1.13695	0.0299967	Up
Q8BNV1	Trmt2a Htf9-c Htf9c	AVAAPFDTVHIPEATK	261	276	0.777432	0.0301613	Down
P17918	Pcna	ATPLSPTVTLSM	218	229	0.857698	0.0308518	Down
P61161	Actr2 Arp2	GYAGSNFPEHIFPA	21	34	0.677248	0.0308518	Down
P17225	Ptbp1 Ptb	IAIPGLAGAGNSVLLVS	324	340	0.848462	0.0309642	Down
Q68FD5	Cltc	MTADLPNELIELLEK	996	1010	1.17936	0.0310747	Up
Q8K0D5	Gfm1 Efg Efg1 Gfm	RYQPCSPSTQEELINK	719	734	1.0602	0.0310747	Up
P63017	Hspa8 Hsc70 Hsc73	LDKNQTAEKEEFEHQQK	581	597	1.17707	0.0318535	Up
Q91VI7	Rnh1 Rnh	WTNEVEEQLR	434	443	1.10815	0.0318535	Up
Q9Z2X1	Hnrnpf Hnrpf	VELESEDDVK	59	68	1.17651	0.0318535	Up
P09103	P4hb Pdia1	KVLVGANFEEVAFDEK	372	387	1.21214	0.032532	Up
P52480	Pkm Pk3 Pkm2 Pykm	SGAIIVLTK	425	433	1.12459	0.032532	Up
P97807	Fh Fh1	AEQFDEWVKPK	491	501	1.07305	0.032532	Up
Q7TMK9	Syncrip Hnrpq Nsap1 Nsap1l	VTEGLTDVIL	266	275	1.40862	0.032532	Up
Q9D0R2	Tars1 Tars	FLGDIEIWNQ	504	513	1.3222	0.032532	Up
Q9JHU4	Dync1h1 Dhc1 Dnch1 Dnchc1 Dyhc	STLKEDVGDEGEEEKEFISY	80	99	1.19367	0.032532	Up
Q9Z179	Shcbp1 Pal	GLPDDIVIEK	407	416	1.15722	0.032532	Up
Q8VIJ6	Sfpq Psf	VGNLPADITEDEFKR	293	307	1.2775	0.0327458	Up
Q9EQU5	Set	GEKEQQEAIEHIDEVQNEIDRL	36	57	0.61468	0.0329445	Down
P62192	Psmc1	LADDVTLDDLIMAK	374	387	1.18433	0.0329681	Up
P08905	Lyz2 Lyz Lyzs	GDQSTDYGIFQIN	66	78	0.805919	0.0329699	Down
P08113	Hsp90b1 Grp94 Tra-1 Tra1	RIKEDEDDKTVMDLA	700	714	1.07263	0.0330399	Up
P08003	Pdia4 Cai Erp72	IADEEDYATEVKDL	445	458	1.09831	0.0332156	Up
P08249	Mdh2 Mor1	GASGGIGQPLSLLLK	31	45	1.18303	0.0332223	Up
Q8VDD5	Myh9	RKLEGDSTDLSDQIAELQ	1051	1068	1.14138	0.0340173	Up
P20029	Hspa5 Grp78	DIDEIVLVGGSTR	356	368	1.19966	0.034358	Up
P40142	Tkt	FLPEAELLNLR	91	101	1.28101	0.034358	Up
P80316	Cct5 Ccte Kiaa0098	AFADALEVIPM	450	460	1.29668	0.034358	Up
P99024	Tubb5	TVPELTQQVFDAK	285	297	1.29274	0.034358	Up
P58252	Eef2	ARPFPDGLAEDIDKGEVS	606	623	1.18158	0.0345485	Up
P80314	Cct2 Cctb	SLADSYLDEGFLLDKK	208	223	1.18201	0.0345485	Up
Q6PB66	Lrpprc Lrp130	DLESTLEK	662	669	1.18283	0.0345485	Up
P29341	Pabpc1 Pabp1	LLEIDNSELLHML	585	597	1.38564	0.0349949	Up
P17751	Tpi1 Tpi	ALAEGLGVIAC	117	127	0.762164	0.0349949	Down
Q9Z1Z2	Strap Unrip	VLPEEDSGELAKPK	306	319	1.05061	0.0351673	Up
Q9EQP2	Ehd4 Past2	SISIIDSPGIL	151	161	1.57914	0.0357448	Up
P09405	Ncl Nuc	KETLEEVFEK	500	509	1.21192	0.0358884	Up
E9PVX6	Mki67	EITQISDHSEKL	2866	2877	0.804652	0.0359751	Down
P09411	Pgk1 Pgk-1	ITLPVDFVTAD	280	290	1.30382	0.0360867	Up
P80317	Cct6a Cct6 Cctz Cctz1	IITEGFEAA	118	126	0.630296	0.0360867	Down
Q99K51	Pls3	ISKDELDELKEAFAK	9	23	1.11319	0.0360871	Up
P46471	Psmc2 Mss1	QVEEKPDVTYSDVGGCK	165	181	1.20843	0.0365178	Up
P40124	Cap1 Cap	DSLLANPVAEYLK	47	59	1.1953	0.0369105	Up
Q03963	Eif2ak2 Pkr Prkr Tik	AVDILDNENKVDCH	70	83	1.15519	0.0369105	Up
Q6PB66	Lrpprc Lrp130	VIEEQMEPALEKL	1223	1235	1.21715	0.0369105	Up
P57759	Erp29	YDALAGEFIK	163	172	1.31071	0.0372785	Up
P58252	Eef2	GELHLEIC	550	557	1.16187	0.0374564	Up
Q04447	Ckb Ckbb	LRFPAEDEFPDLSSHN	12	27	0.839818	0.0374564	Down
P07356	Anxa2 Anx2 Cal1h	DLEKDIISDTSGDFR	154	168	1.23742	0.0375193	Up
P52480	Pkm Pk3 Pkm2 Pykm	VDLPAVSEKDIQDLK	216	230	1.15298	0.0375193	Up
P42227	Stat3 Aprf	SIVSELAGLL	216	225	1.55031	0.0375672	Up
P09671	Sod2 Sod-2	KHSLPDLPYDYGALEPHINAQIMQLHHSK	25	53	1.3779	0.0376501	Up
Q99L47	St13 Fam10a1 Hip	LLGHWEEAAHDLALA	193	207	1.24948	0.0376501	Up
P09103	P4hb Pdia1	DALEEEDNVLVLKK	20	33	1.20423	0.0378341	Up
P12265	Gusb Gus Gus-s	DTSFDFFNYAGLHR	202	215	1.26113	0.0378821	Up
Q99K48	Nono	NEGLTIDLK	54	62	1.17551	0.0379997	Up
Q60780	Gas7	TVEPVDQLLR	385	394	0.887663	0.0385669	Down
Q8CHW4	Eif2b5	GPEVSLGHGSVL	341	352	0.776562	0.0385669	Down
Q9D8Y0	Efhd2 Sws1	IQEVDEDFDSK	137	147	1.25238	0.0386098	Up
Q03265	Atp5f1a Atp5a1	IAIDTIINQ	221	229	0.837497	0.0386098	Down
P24452	Capg Mbh1	DLGQNIFAW	171	179	1.18225	0.0390467	Up
Q99KQ4	Nampt Pbef1	EEGKGDLEEYGHDLLHTVFK	444	463	1.19871	0.0390467	Up
Q9JHK5	Plek	LPETIDLGALYLSMKDPEKG	120	139	1.27974	0.0390467	Up
P27773	Pdia3 Erp Erp60 Grp58	RDLFSDGHSEFLK	161	173	1.12983	0.0393147	Up
Q8BJ71	Nup93 Cip4 Kiaa0095	AAETEGISELPHVE	17	30	0.724139	0.0393722	Down
Q61753	Phgdh	SLTGVVNAQALTSAFSPH	311	328	0.877831	0.0396655	Down
P56959	Fus	LKGEATVSFDD	326	336	1.08855	0.039963	Up
Q9CPR4	Rpl17	TEKEQIVPKPEEEVAQK	151	167	1.11517	0.039963	Up
Q9JHJ0	Tmod3	DLGDYKDLDEDELLGKL	8	24	1.19116	0.039963	Up
P42932	Cct8 Cctq	LRDVDEVSSLLR	154	165	0.838619	0.039963	Down
P42932	Cct8 Cctq	VSIFPDSGNFNVDNIR	188	203	1.23055	0.040024	Up
P54987	Acod1 Irg1	EALAIAVS	186	193	1.31206	0.040024	Up
Q9ESP1	Sdf2l1	NLHTHHFPSPLSNNQEVSAF	114	133	0.575355	0.040024	Down
Q8BG05	Hnrnpa3 Hnrpa3	KIFVGGIKEDTEEYNL	127	142	1.52553	0.0400704	Up
Q8BWZ3	Naa25 Mdm20	AQEVAALEPTDDNSLQAL	68	85	1.35052	0.0401251	Up
Q9QUR7	Pin1	SKEEALELIN	83	92	1.18626	0.0401251	Up
P60122	Ruvbl1 Tip49 Tip49a	TEGINISEEALNHLGEIGTK	381	400	1.09031	0.040139	Up
Q01853	Vcp	FDELDSIAK	576	584	1.17664	0.0402846	Up
P10126	Eef1a1 Eef1a	SGDAAIVDMVPGKPM	396	410	1.20119	0.0404656	Up
P09671	Sod2 Sod-2	SLPDLPYDYGALEPHINAQIMQLHHSK	27	53	1.4096	0.0406834	Up
Q60715	P4ha1	NTEWSELENLILK	92	104	1.29846	0.0406834	Up
P24452	Capg Mbh1	VEIITDGEEPAEMIQVLGPKPALK	210	233	1.12064	0.0418274	Up
Q8K0Z7	Taco1 Ccdc44	ALNNYEDVIHVY	279	290	1.4994	0.0418274	Up
Q9CY58	Serbp1 Pairbp1	NVTEETPEGEEHPVADTENKENEVEEVKEEGPK	253	285	1.11292	0.0420368	Up
Q01853	Vcp	VLFFDELDSIAK	573	584	1.13201	0.0422044	Up
Q61584	Fxr1 Fxr1h	AFHEEFVVR	218	226	0.668592	0.0423197	Down
P48036	Anxa5 Anx5	LYDAYEL	88	94	1.2506	0.0425313	Up
P62334	Psmc6 Sug2	VALDMTTL	98	105	1.16976	0.0425313	Up
P62843	Rps15 Rig	DMIILPEMVGS	82	92	1.11358	0.0425313	Up
Q8BP92	Rcn2	EDVDEYVKL	52	60	1.11135	0.0425313	Up
Q99P91	Gpnmb Dchil Hgfin Nmb	ATITIVEG	383	390	0.725449	0.0425313	Down
Q60973	Rbbp7 Rbap46	LVLGTHTSDEQNHLVVAR	65	82	0.641505	0.0425667	Down
P16858	Gapdh Gapd	RVIISAPSADAPMFV	116	130	0.591903	0.0425771	Down
B2RQC6	Cad	DFSVPLIIDIK	1421	1431	1.17094	0.0427346	Up
P62192	Psmc1	ADDVTLDDLIMAK	375	387	1.14857	0.0427346	Up
Q62426	Cstb Cst6 Stfb	GAPSATMPATAETQEVADQVK	4	24	0.651423	0.0427346	Down
Q9JHK5	Plek	GVIDWLVSNK	160	169	0.858	0.0427346	Down
Q64345	Ifit3 Garg49 Ifi49 Isg49	KESPDVEEEDLYERY	351	365	0.895737	0.0427977	Down
P11983	Tcp1 Cct1 Ccta	GVQVVITDPEK	249	259	1.26135	0.0428228	Up
P26039	Tln1 Tln	GNLPEFGDAIATASK	1417	1431	1.11024	0.0428228	Up
Q8K0C9	Gmds	GITGQDGSYLAEFLLEK	30	46	1.25667	0.0428468	Up
Q9D819	Ppa1 Pp Pyp	AIVDALPPPCESAC	261	274	1.35777	0.0428468	Up
P59325	Eif5	ELGAQTQFDVK	60	70	1.11856	0.0429298	Up
P18760	Cfl1	KEILVGDVGQTVDDPYTTFVK	53	73	1.07307	0.0436378	Up
Q68FD5	Cltc	RPLIDQVVQTALSETQD	968	984	1.13059	0.0443651	Up
P18242	Ctsd	LNRDPEGQPGGELMLGGTDSK	231	251	1.21888	0.0444371	Up
P40124	Cap1 Cap	VQAFDSLLANPVAEYLK	43	59	1.45838	0.0444371	Up
Q8VDD5	Myh9	KTQLEELEDELQATEDAK	1538	1555	1.16099	0.044995	Up
Q76MZ3	Ppp2r1a	SPSDLEAHFVPLVK	120	133	0.693566	0.0453665	Down
Q61599	Arhgdib Gdid4	MVGSYGPRPEEYEFLTPVEEAPK	141	163	1.27632	0.0454643	Up
P08113	Hsp90b1 Grp94 Tra-1 Tra1	DDEVDVDGTVEEDLGK	22	37	1.11918	0.0456697	Up
Q8R180	Ero1a Ero1l	SVIYEENCFKPQ	200	211	1.47109	0.0457912	Up
P09103	P4hb Pdia1	LGETYKDHENIIIA	412	425	1.16591	0.0459013	Up
Q91Z38	Ttc1	LKDLGNLVLRPF	251	262	1.12328	0.0459013	Up
Q9WV32	Arpc1b	LASETLPLLAVTF	240	252	1.33459	0.046026	Up
Q64337	Sqstm1 A170 STAP	GIEVDIDVEHGGK	252	264	0.804797	0.0460938	Down
P06745	Gpi Gpi1	ILLANFLAQ	424	432	1.24835	0.0461967	Up
P24452	Capg Mbh1	VEIITDGEEPAEMIQVLGPKPA	210	231	1.17065	0.0461967	Up
P42932	Cct8 Cctq	AEAFEAIPR	442	450	1.11086	0.0461967	Up
P52480	Pkm Pk3 Pkm2 Pykm	AVDLPAVSEKDIQDLK	215	230	1.05755	0.0461967	Up
P62843	Rps15 Rig	GVDLDQLLDMSYEQL	19	33	1.20851	0.0461967	Up
Q8R180	Ero1a Ero1l	GAVDESLSEETQK	137	149	1.13446	0.0461967	Up
Q9EST5	Anp32b Pal31	LAEELPSLTHL	83	93	1.15108	0.0461967	Up
P56399	Usp5 Isot	IGEWELIQ	304	311	0.823079	0.0461967	Down
Q8K0Z7	Taco1 Ccdc44	AIEAGAEDVKEAEDEEEKNLFK	207	228	1.66711	0.0478828	Up
Q8K1R3	Pnpt1 Pnpase	KLQAETGVTIS	630	640	0.759429	0.0481292	Down
P06151	Ldha Ldh-1 Ldh1	MKDLADELALVDVMEDK	41	57	1.10897	0.0489344	Up
P97311	Mcm6 Mcmd6 Mis5	THYDHVLIELT	781	791	0.678143	0.0489344	Down
P10126	Eef1a1 Eef1a	VETGVLKPGMVVTF	267	280	1.18033	0.0489367	Up
P20029	Hspa5 Grp78	KIEWLESHQDADIEDFK	602	618	1.25229	0.0489367	Up
P60122	Ruvbl1 Tip49 Tip49a	LDPSIFESL	172	180	1.14231	0.0489367	Up
P80313	Cct7 Ccth	VEEGLHPQIIIR	112	123	1.24668	0.0489367	Up
P80314	Cct2 Cctb	GGSLADSYLDEGFLLDK	206	222	1.21904	0.0489367	Up
P50580	Pa2g4 Ebp1 Plfap	VAHTFVIGVAQGTQVTGR	121	138	0.696947	0.0489367	Down
Q8CHH9	Septin8 Kiaa0202 Sept8	GGHVGFDSLPDQLVSK	22	37	0.761628	0.0489367	Down
Q9Z1Q9	Vars1 Bat6 G7a Vars Vars2	LLSPFMPF	1058	1065	0.793682	0.0489367	Down
Q01853	Vcp	WEDIGGLEDVKR	476	487	1.24858	0.0490624	Up
Q922R8	Pdia6 Txndc7	APPPELLEIINEDIAK	273	288	0.764137	0.049142	Down
P09103	P4hb Pdia1	NFEEVAFDEK	378	387	1.21837	0.0492089	Up
P09411	Pgk1 Pgk-1	VLPGVDAL	407	414	1.23075	0.0492089	Up
P29351	Ptpn6 Hcp Hcph Ptp1C	WYHGHISGGQAESLLQ	110	125	0.717128	0.0492089	Down
Q5SSZ5	Tns3 Tens1	AGVDPAPSLGSF	791	802	0.762544	0.0492089	Down
Q9CPY7	Lap3 Lapep	GSPNATEAPLVFVGK	268	282	1.1941	0.0492349	Up
P17751	Tpi1 Tpi	KELASQPDVDGF	219	230	0.878853	0.0492846	Down
P40142	Tkt	FLPEAELL	91	98	0.768961	0.0496765	Down
Q922K7	Nop2 Nol1	IQDIVGVL	228	235	1.22932	0.0499121	Up
Q9JHK5	Plek	LPETIDLGALYLSMKD	120	135	1.3169	0.0499121	Up

## Sheet: Protein Aboundence Change list
Table S5 The list of protein aboundance significantly changed in 12h or 24h LPS treatment
Uniprot Protein Accession	Genes	Protein Description	12h(ratio)	12h(p.adjust)	sig(12h)	24h(ratio)	24h(p.adjust)	sig(24h)
A2A6Q5	Cdc27	Cell division cycle protein 27 homolog				1.19888	0.0190496	Up
A2A9C3	Szt2	KICSTOR complex protein SZT2 (Seizure threshold 2 protein) (Transcript increased in glutamate resistance) (TIGR)				1.41845	0.0127142	Up
A2ADY9	Ddi2	Protein DDI1 homolog 2 (EC 3.4.23.-)				1.1479	0.0170862	Up
A2AF47	Dock11 Ziz2	Dedicator of cytokinesis protein 11 (Activated Cdc42-associated guanine nucleotide exchange factor) (ACG) (Zizimin-2)				1.31358	0.0231199	Up
A2AGT5	Ckap5	Cytoskeleton-associated protein 5	1.10891	0.000481773	Up	1.27755	0.000481773	Up
A2AIV8	Card9	Caspase recruitment domain-containing protein 9	1.25133	0.0226751	Up	1.26831	0.0226751	Up
A2AKX3	Setx Als4 Kiaa0625	Probable helicase senataxin (EC 3.6.4.-) (Amyotrophic lateral sclerosis 4 protein homolog) (SEN1 homolog)	1.46771	2.93377e-05	Up	1.62646	2.93377e-05	Up
A2AMZ4	Ndufaf8	NADH dehydrogenase [ubiquinone] 1 alpha subcomplex assembly factor 8				0.678057	0.00136892	Down
A2APB8	Tpx2	Targeting protein for Xklp2	1.39838	0.012112	Up	1.40155	0.012112	Up
A2APY7	Ndufaf5	Arginine-hydroxylase NDUFAF5, mitochondrial (EC 1.-.-.-) (NADH dehydrogenase [ubiquinone] 1 alpha subcomplex assembly factor 5) (Putative methyltransferase NDUFAF5) (EC 2.1.1.-)				0.894014	0.0352686	Down
A2AT37	Upf2	Regulator of nonsense transcripts 2 (Nonsense mRNA reducing factor 2) (Up-frameshift suppressor 2 homolog) (Upf2)	0.893363	0.00660801	Down	0.908917	0.00660801	Down
A2AWP8	Arhgef10l Kiaa1626	Rho guanine nucleotide exchange factor 10-like protein (GrinchGEF)	1.17631	0.00112566	Up	1.43669	0.00112566	Up
A2BDX3	Mocs3 Uba4	Adenylyltransferase and sulfurtransferase MOCS3 (Molybdenum cofactor synthesis protein 3) [Includes: Molybdopterin-synthase adenylyltransferase (EC 2.7.7.80) (Adenylyltransferase MOCS3) (Sulfur carrier protein MOCS2A adenylyltransferase); Molybdopterin-synthase sulfurtransferase (EC 2.8.1.11) (Sulfur carrier protein MOCS2A sulfurtransferase) (Sulfurtransferase MOCS3)]				1.28919	6.90701e-05	Up
A2BE28	Las1l	Ribosomal biogenesis protein LAS1L (Protein LAS1 homolog)	1.19897	0.000389358	Up	1.42588	0.000389358	Up
A3KGB4	Tbc1d8b	TBC1 domain family member 8B	0.79555	0.0186414	Down
A6H5X4	Phf11 D14Ertd668e Phf11d Phf11l	PHD finger protein 11 (PHD finger protein 11-like) (PHD finger protein 11D)				0.613217	0.00400804	Down
A6H5Y3	Mtr	Methionine synthase (MS) (EC 2.1.1.13) (5-methyltetrahydrofolate--homocysteine methyltransferase) (Cobalamin-dependent methionine synthase) (Vitamin-B12 dependent methionine synthase)	1.34326	0.00109895	Up	1.48719	0.00109895	Up
A6H630	Armt1	Damage-control phosphatase ARMT1 (EC 3.1.3.-) (Acidic residue methyltransferase 1) (Protein-glutamate O-methyltransferase) (EC 2.1.1.-) (Sugar phosphate phosphatase ARMT1)	1.23632	0.00217117	Up	1.35722	0.00217117	Up
A8C756	Thada Kiaa1767	Thyroid adenoma-associated protein homolog				1.18446	0.0182815	Up
A8Y5H7	Sec14l1 Kiaa4251	SEC14-like protein 1				1.30636	0.00847287	Up
B1ARD6	Slfn9	Schlafen family member 9 (EC 3.1.-.-) (Schlafen-9)	0.920201	0.00805264	Down	0.891248	0.00805264	Down
B1ARD8	Slfn8	Schlafen family member 8 (EC 3.1.-.-) (Schlafen-8) (mSLFN8)	0.61092	0.000329781	Down	0.869633	0.000329781	Down
B1AY10	Nfx1	Transcriptional repressor NF-X1 (m-Nfx.1) (EC 2.3.2.-) (Nuclear transcription factor, X box-binding protein 1)				1.1578	0.0135324	Up
B1AZP2	Dlgap4 Kiaa0964 Sapap4	Disks large-associated protein 4 (DAP-4) (PSD-95/SAP90-binding protein 4) (SAP90/PSD-95-associated protein 4) (SAPAP-4)	0.782312	0.0204745	Down	0.721634	0.0204745	Down
B2RQC6	Cad	CAD protein [Includes: Glutamine-dependent carbamoyl-phosphate synthase (EC 6.3.5.5); Aspartate carbamoyltransferase (EC 2.1.3.2); Dihydroorotase (EC 3.5.2.3)]	1.09799	0.00112492	Up	1.19709	0.00112492	Up
B2RRE7	Otud4 Kiaa1046	OTU domain-containing protein 4 (EC 3.4.19.12)				1.1974	0.0352568	Up
B2RX14	Tut4 Kiaa0191 Zcchc11	Terminal uridylyltransferase 4 (TUTase 4) (EC 2.7.7.52) (Zinc finger CCHC domain-containing protein 11)	1.26349	0.00345044	Up	1.41813	0.00345044	Up
B2RXR6	Ankrd44	Serine/threonine-protein phosphatase 6 regulatory ankyrin repeat subunit B (PP6-ARS-B) (Serine/threonine-protein phosphatase 6 regulatory subunit ARS-B) (Ankyrin repeat domain-containing protein 44)				1.17391	0.0152936	Up
B7ZMP1	Xpnpep3	Xaa-Pro aminopeptidase 3 (X-Pro aminopeptidase 3) (EC 3.4.11.9) (Aminopeptidase P3) (APP3)	0.839351	0.00213838	Down	0.637568	0.00213838	Down
B8ZXI1	Qtrt2 Qtrtd1	Queuine tRNA-ribosyltransferase accessory subunit 2 (Queuine tRNA-ribosyltransferase domain-containing protein 1)				0.837257	0.0214219	Down
B9EJR8	Dnaaf5 Heatr2	Dynein axonemal assembly factor 5 (HEAT repeat-containing protein 2)	0.830863	0.0373756	Down
C0HKD9	Mfap1b	Microfibrillar-associated protein 1B (Spliceosome B complex protein MFAP1B)	0.867005	0.0060373	Down
D0QMC3	Mndal	Myeloid cell nuclear differentiation antigen-like protein	0.911957	7.19672e-05	Down	0.726289	7.19672e-05	Down
D3Z4S3	Ptrhd1	Putative peptidyl-tRNA hydrolase PTRHD1 (EC 3.1.1.29) (Peptidyl-tRNA hydrolase domain-containing protein 1)				1.21593	0.00393989	Up
D3Z7P3	Gls Gls1 Kiaa0838	Glutaminase kidney isoform, mitochondrial (GLS) (EC 3.5.1.2) [Cleaved into: Glutaminase kidney isoform, mitochondrial 68 kDa chain; Glutaminase kidney isoform, mitochondrial 65 kDa chain]	0.925641	0.00164178	Down	0.869094	0.00164178	Down
E9PVA8	Gcn1 Gcn1l1	eIF-2-alpha kinase activator GCN1 (GCN1 eIF-2-alpha kinase activator homolog) (GCN1-like protein 1) (General control of amino-acid synthesis 1-like protein 1) (Translational activator GCN1)				1.15684	0.000130988	Up
E9PVX6	Mki67	Proliferation marker protein Ki-67 (Antigen identified by monoclonal antibody Ki-67 homolog) (Antigen KI-67 homolog) (Antigen Ki67 homolog)	1.23114	4.68269e-05	Up	1.4596	4.68269e-05	Up
E9Q1P8	Irf2bp2	Interferon regulatory factor 2-binding protein 2 (IRF-2-binding protein 2) (IRF-2BP2)	1.23828	2.37815e-05	Up	1.39299	2.37815e-05	Up
E9Q2M9	Wdfy4	WD repeat- and FYVE domain-containing protein 4	1.12641	0.000358343	Up	1.23283	0.000358343	Up
E9Q394	Akap13 Brx	A-kinase anchor protein 13 (AKAP-13) (AKAP-Lbc)	0.78989	0.00292924	Down
E9Q3L2	Pi4ka Pik4 Pik4ca	Phosphatidylinositol 4-kinase alpha (PI4-kinase alpha) (PI4K-alpha) (PtdIns-4-kinase alpha) (EC 2.7.1.67)				1.40406	0.00780631	Up
E9Q555	Rnf213 Mystr	E3 ubiquitin-protein ligase RNF213 (EC 2.3.2.27) (EC 3.6.4.-) (Mysterin) (RING finger protein 213) (RING-type E3 ubiquitin transferase RNF213)	0.760087	1.95201e-05	Down	0.701619	1.95201e-05	Down
E9Q5G3	Kif23	Kinesin-like protein KIF23	1.39213	3.99746e-05	Up	1.55308	3.99746e-05	Up
E9Q634	Myo1e Myr3	Unconventional myosin-Ie (Unconventional myosin 1E)	0.770961	8.9483e-05	Down	0.745578	8.9483e-05	Down
E9Q7E2	Arid2 Baf200	AT-rich interactive domain-containing protein 2 (ARID domain-containing protein 2) (BRG1-associated factor 200) (BAF200) (Zinc finger protein with activation potential) (Zipzap/p200)	1.15561	0.00817195	Up	1.17716	0.00817195	Up
E9Q7G0	Numa1	Nuclear mitotic apparatus protein 1 (Nuclear mitotic apparatus protein) (NuMA protein)	1.09152	5.92432e-05	Up	1.21984	5.92432e-05	Up
E9QAM5	Helz2	Helicase with zinc finger domain 2 (EC 3.6.4.-) (PPAR-gamma DNA-binding domain-interacting protein 1) (PDIP1) (PPAR-gamma DBD-interacting protein 1)	0.740231	0.00292778	Down	0.828735	0.00292778	Down
F7BJB9	Morc3 Nxp2 Zcwcc3	MORC family CW-type zinc finger protein 3 (Nuclear matrix protein 2) (Zinc finger CW-type coiled-coil domain protein 3)	0.911057	0.000354672	Down	1.17734	0.000354672	Up
F8VPQ2	Arid4a Rbbp1 Rbp1	AT-rich interactive domain-containing protein 4A (ARID domain-containing protein 4A) (Retinoblastoma-binding protein 1)	1.2303	0.00386588	Up	1.369	0.00386588	Up
G5E829	Atp2b1	Plasma membrane calcium-transporting ATPase 1 (EC 7.2.2.10) (Plasma membrane calcium ATPase isoform 1) (PMCA1) (Plasma membrane calcium pump isoform 1)	0.765184	0.0132264	Down	0.731523	0.0132264	Down
G5E870	Trip12	E3 ubiquitin-protein ligase TRIP12 (EC 2.3.2.26) (HECT-type E3 ubiquitin transferase TRIP12) (Thyroid receptor-interacting protein 12) (TR-interacting protein 12) (TRIP-12)	0.817809	0.00213013	Down
L0N7N1	Kif14	Kinesin-like protein KIF14				1.39145	0.0187928	Up
O08528	Hk2	Hexokinase-2 (EC 2.7.1.1) (Hexokinase type II) (HK II)	0.916162	0.000214098	Down	0.811337	0.000214098	Down
O08553	Dpysl2 Crmp2 Ulip2	Dihydropyrimidinase-related protein 2 (DRP-2) (Unc-33-like phosphoprotein 2) (ULIP-2)	1.05776	0.032807	Up
O08582	Gtpbp1 Gtpbp	GTP-binding protein 1 (G-protein 1) (GP-1) (GP1)				1.19211	0.00479524	Up
O08599	Stxbp1	Syntaxin-binding protein 1 (Protein unc-18 homolog 1) (Unc18-1) (Protein unc-18 homolog A) (Unc-18A)	0.797659	0.00113092	Down	0.713913	0.00113092	Down
O08663	Metap2 Mnpep P67eif2	Methionine aminopeptidase 2 (MAP 2) (MetAP 2) (EC 3.4.11.18) (Initiation factor 2-associated 67 kDa glycoprotein) (p67) (p67eIF2) (Peptidase M)	0.804868	0.00145584	Down	0.930729	0.00145584	Down
O08709	Prdx6 Aop2 Ltw4 Prdx5	Peroxiredoxin-6 (EC 1.11.1.27) (1-Cys peroxiredoxin) (1-Cys PRX) (Acidic calcium-independent phospholipase A2) (aiPLA2) (EC 3.1.1.4) (Antioxidant protein 2) (Glutathione-dependent peroxiredoxin) (Lysophosphatidylcholine acyltransferase 5) (LPC acyltransferase 5) (LPCAT-5) (Lyso-PC acyltransferase 5) (EC 2.3.1.23) (Non-selenium glutathione peroxidase) (NSGPx)	1.05074	0.0138233	Up
O08739	Ampd3	AMP deaminase 3 (EC 3.5.4.6) (AMP deaminase H-type) (AMP deaminase isoform E) (Heart-type AMPD)				0.622137	0.00220785	Down
O08749	Dld	Dihydrolipoyl dehydrogenase, mitochondrial (EC 1.8.1.4) (Dihydrolipoamide dehydrogenase)	0.917118	1.36714e-05	Down	0.685663	1.36714e-05	Down
O08784	Tcof1	Treacle protein (Treacher Collins syndrome protein homolog)				0.859204	0.00271659	Down
O08788	Dctn1	Dynactin subunit 1 (150 kDa dynein-associated polypeptide) (DAP-150) (DP-150) (p150-glued)	1.05586	0.0130883	Up	1.05781	0.0130883	Up
O08795	Prkcsh	Glucosidase 2 subunit beta (80K-H protein) (Glucosidase II subunit beta) (Protein kinase C substrate 60.1 kDa protein heavy chain) (PKCSH)	0.945559	0.000745514	Down	0.849543	0.000745514	Down
O08800	Serpinb8	Serpin B8	1.23128	0.00154178	Up	1.435	0.00154178	Up
O08808	Diaph1 Diap1	Protein diaphanous homolog 1 (Diaphanous-related formin-1) (DRF1) (p140mDIA) (mDIA1)	0.948834	0.00292924	Down	0.915393	0.00292924	Down
O08810	Eftud2 Snrp116	116 kDa U5 small nuclear ribonucleoprotein component (Elongation factor Tu GTP-binding domain-containing protein 2) (U5 snRNP-specific protein, 116 kDa) (U5-116 kDa)				1.08504	0.0200456	Up
O08908	Pik3r2	Phosphatidylinositol 3-kinase regulatory subunit beta (PI3-kinase regulatory subunit beta) (PI3K regulatory subunit beta) (PtdIns-3-kinase regulatory subunit beta) (Phosphatidylinositol 3-kinase 85 kDa regulatory subunit beta) (PI3-kinase subunit p85-beta) (PtdIns-3-kinase regulatory subunit p85-beta)	1.19866	0.000358343	Up	1.26921	0.000358343	Up
O08915	Aip	AH receptor-interacting protein (AIP) (Aryl-hydrocarbon receptor-interacting protein)	1.07718	7.53452e-05	Up	1.26072	7.53452e-05	Up
O09131	Gsto1 Gstx Gtsttl	Glutathione S-transferase omega-1 (GSTO-1) (EC 2.5.1.18) (Glutathione S-transferase omega 1-1) (GSTO 1-1) (Glutathione-dependent dehydroascorbate reductase) (EC 1.8.5.1) (Monomethylarsonic acid reductase) (MMA(V) reductase) (EC 1.20.4.2) (S-(Phenacyl)glutathione reductase) (SPG-R) (p28)	1.15906	0.0011621	Up	1.33069	0.0011621	Up
O35127	Grcc10 C10	Protein C10	1.12647	0.000154111	Up	1.26229	0.000154111	Up
O35130	Emg1 C2f Grcc2f	Ribosomal RNA small subunit methyltransferase NEP1 (EC 2.1.1.-) (18S rRNA (pseudouridine(1248)-N1)-methyltransferase) (18S rRNA Psi1248 methyltransferase) (Nucleolar protein EMG1 homolog) (Protein C2f) (Ribosome biogenesis protein NEP1)				0.781689	0.0108535	Down
O35134	Polr1a Rpa1 Rpo1-4	DNA-directed RNA polymerase I subunit RPA1 (RNA polymerase I subunit A1) (EC 2.7.7.6) (DNA-directed RNA polymerase I largest subunit) (DNA-directed RNA polymerase I subunit A) (RNA polymerase I 194 kDa subunit) (RPA194)				1.30007	0.000906726	Up
O35218	Cpsf2 Cpsf100 Mcpsf	Cleavage and polyadenylation specificity factor subunit 2 (Cleavage and polyadenylation specificity factor 100 kDa subunit) (CPSF 100 kDa subunit)				1.14401	0.00317974	Up
O35226	Psmd4 Mcb1	26S proteasome non-ATPase regulatory subunit 4 (26S proteasome regulatory subunit RPN10) (26S proteasome regulatory subunit S5A) (Multiubiquitin chain-binding protein)				0.889054	0.00292778	Down
O35239	Ptpn9	Tyrosine-protein phosphatase non-receptor type 9 (EC 3.1.3.48) (Protein-tyrosine phosphatase MEG2) (PTPase MEG2)				1.69433	0.0262734	Up
O35250	Exoc7 Exo70	Exocyst complex component 7 (Exocyst complex component Exo70)	1.17288	0.00459579	Up	1.38852	0.00459579	Up
O35309	Nmi	N-myc-interactor (Nmi) (N-myc and STAT interactor)	0.859782	2.19787e-06	Down	0.652177	2.19787e-06	Down
O35345	Kpna6 Kpna5	Importin subunit alpha-7 (Importin alpha-S2) (Karyopherin subunit alpha-6)				1.07108	0.0205847	Up
O35350	Capn1 Canp1 Capa1	Calpain-1 catalytic subunit (EC 3.4.22.52) (Calcium-activated neutral proteinase 1) (CANP 1) (Calpain mu-type) (Calpain-1 large subunit) (Micromolar-calpain) (muCANP)	1.10003	0.0334154	Up
O35368	Ifi203	Interferon-activable protein 203 (Ifi-203) (Interferon-inducible protein p203)	0.851794	0.00517141	Down	0.745966	0.00517141	Down
O35381	Anp32a Anp32 Lanp	Acidic leucine-rich nuclear phosphoprotein 32 family member A (Acidic nuclear phosphoprotein pp32) (Leucine-rich acidic nuclear protein) (LANP) (Potent heat-stable protein phosphatase 2A inhibitor I1PP2A)	1.08287	0.024067	Up	1.11168	0.024067	Up
O35448	Ppt2	Lysosomal thioesterase PPT2 (PPT-2) (EC 3.1.2.-)				0.744927	0.0315366	Down
O35459	Ech1	Delta(3,5)-Delta(2,4)-dienoyl-CoA isomerase, mitochondrial (EC 5.3.3.-)				0.783807	0.000239811	Down
O35495	Cdk14 Kiaa0834 Pftk1	Cyclin-dependent kinase 14 (EC 2.7.11.22) (Cell division protein kinase 14) (Serine/threonine-protein kinase PFTAIRE-1)	0.737428	0.000152314	Down	0.776538	0.000152314	Down
O35551	Rabep1 Rab5ep Rabpt5 Rabpt5a	Rab GTPase-binding effector protein 1 (Rabaptin-5) (Rabaptin-5alpha)				0.903781	0.0209522	Down
O35593	Psmd14 Pad1	26S proteasome non-ATPase regulatory subunit 14 (EC 3.4.19.-) (26S proteasome regulatory subunit RPN11) (MAD1)				0.940925	0.0271823	Down
O35601	Fyb1 Fyb	FYN-binding protein 1 (Adhesion and degranulation promoting adaptor protein) (ADAP) (FYB-120/130) (p120/p130) (FYN-T-binding protein) (SLAP-130) (SLP-76-associated phosphoprotein)	0.89296	0.00287696	Down	0.817112	0.00287696	Down
O35613	Daxx	Death domain-associated protein 6 (Daxx)	0.712551	0.000417234	Down	0.689174	0.000417234	Down
O35639	Anxa3 Anx3	Annexin A3 (35-alpha calcimedin) (Annexin III) (Annexin-3) (Lipocortin III) (Placental anticoagulant protein III) (PAP-III)	0.848544	0.000256812	Down	0.682798	0.000256812	Down
O35643	Ap1b1 Adtb1	AP-1 complex subunit beta-1 (Adaptor protein complex AP-1 subunit beta-1) (Adaptor-related protein complex 1 subunit beta-1) (Beta-1-adaptin) (Beta-adaptin 1) (Clathrin assembly protein complex 1 beta large chain) (Golgi adaptor HA1/AP1 adaptin beta subunit)				0.936044	0.00639417	Down
O35648	Cetn3 Cen3	Centrin-3				1.25765	0.00272589	Up
O35654	Pold2	DNA polymerase delta subunit 2 (DNA polymerase delta subunit p50)				1.41018	0.0264199	Up
O35658	C1qbp Gc1qbp	Complement component 1 Q subcomponent-binding protein, mitochondrial (GC1q-R protein) (Glycoprotein gC1qBP) (C1qBP)	0.912887	0.000174094	Down	0.763896	0.000174094	Down
O35691	Pnn	Pinin				1.27229	0.000705736	Up
O35841	Api5	Apoptosis inhibitor 5 (API-5) (AAC-11)	1.08594	0.0292192	Up
O35855	Bcat2 Bcatm Eca40	Branched-chain-amino-acid aminotransferase, mitochondrial (BCAT(m)) (EC 2.6.1.42)				0.84952	0.00324531	Down
O35887	Calu	Calumenin (Crocalbin)	0.969146	0.0286018	Down
O35969	Gamt	Guanidinoacetate N-methyltransferase (EC 2.1.1.2)	1.23831	0.000214098	Up	1.30189	0.000214098	Up
O54692	Zw10	Centromere/kinetochore protein zw10 homolog				1.18562	0.00182445	Up
O54774	Ap3d1 Ap3d	AP-3 complex subunit delta-1 (AP-3 complex subunit delta) (Adaptor-related protein complex 3 subunit delta-1) (Delta-adaptin) (mBLVR1)	1.08819	0.00334176	Up	1.20249	0.00334176	Up
O54781	Srpk2	SRSF protein kinase 2 (EC 2.7.11.1) (SFRS protein kinase 2) (Serine/arginine-rich protein-specific kinase 2) (SR-protein-specific kinase 2) [Cleaved into: SRSF protein kinase 2 N-terminal; SRSF protein kinase 2 C-terminal]				1.29303	0.0132052	Up
O54824	Il16	Pro-interleukin-16 [Cleaved into: Interleukin-16 (IL-16) (Lymphocyte chemoattractant factor) (LCF)]	1.42388	0.0346356	Up
O54833	Csnk2a2	Casein kinase II subunit alpha' (CK II alpha') (EC 2.7.11.1)				0.815563	0.0379265	Down
O54941	Smarce1 Baf57	SWI/SNF-related matrix-associated actin-dependent regulator of chromatin subfamily E member 1 (BRG1-associated factor 57) (BAF57)	1.07312	0.0071918	Up	1.12967	0.0071918	Up
O54946	Dnajb6 Hsj2 Mrj	DnaJ homolog subfamily B member 6 (Heat shock protein J2) (HSJ-2) (MRJ) (mDj4)	0.821526	0.0145982	Down
O54962	Banf1 Baf Bcrp1 L2bp1	Barrier-to-autointegration factor (Breakpoint cluster region protein 1) (LAP2-binding protein 1) [Cleaved into: Barrier-to-autointegration factor, N-terminally processed]	1.18685	0.00123175	Up	1.31233	0.00123175	Up
O54984	Get3 Arsa Asna1	ATPase GET3 (EC 3.6.-.-) (Arsenical pump-driving ATPase) (Arsenite-stimulated ATPase) (Guided entry of tail-anchored proteins factor 3, ATPase)	1.18984	0.00672685	Up
O54988	Slk Kiaa0204 Stk2	STE20-like serine/threonine-protein kinase (STE20-like kinase) (mSLK) (EC 2.7.11.1) (Etk4) (STE20-related kinase SMAK) (STE20-related serine/threonine-protein kinase) (STE20-related kinase) (Serine/threonine-protein kinase 2)	1.03376	0.000174908	Up	1.13183	0.000174908	Up
O55098	Stk10 Lok	Serine/threonine-protein kinase 10 (EC 2.7.11.1) (Lymphocyte-oriented kinase)	0.824731	0.000389007	Down	0.720979	0.000389007	Down
O55131	Septin7 Cdc10 Sept7	Septin-7 (CDC10 protein homolog)				0.932683	0.00520372	Down
O55135	Eif6 Itgb4bp	Eukaryotic translation initiation factor 6 (eIF-6) (B4 integrin interactor) (CAB) (p27(BBP))				0.805924	0.0446083	Down
O55143	Atp2a2	Sarcoplasmic/endoplasmic reticulum calcium ATPase 2 (SERCA2) (SR Ca(2+)-ATPase 2) (EC 7.2.2.10) (Calcium pump 2) (Calcium-transporting ATPase sarcoplasmic reticulum type, slow twitch skeletal muscle isoform) (Endoplasmic reticulum class 1/2 Ca(2+) ATPase)				0.791136	0.00959748	Down
O55201	Supt5h Supt5	Transcription elongation factor SPT5 (DRB sensitivity-inducing factor large subunit) (DSIF large subunit)	1.07358	0.000598049	Up	1.21881	0.000598049	Up
O55222	Ilk ILK1 ILK2	Integrin-linked protein kinase (EC 2.7.11.1) (59 kDa serine/threonine-protein kinase) (Beta-integrin-linked kinase) (ILK-1) (ILK-2) (p59ILK)				1.10901	0.0261422	Up
O70145	Ncf2 Noxa2 P67phox	Neutrophil cytosol factor 2 (NCF-2) (67 kDa neutrophil oxidase factor) (NADPH oxidase activator 2) (Neutrophil NADPH oxidase factor 2) (p67-phox)				1.15834	0.0102937	Up
O70161	Pip5k1c Kiaa0589	Phosphatidylinositol 4-phosphate 5-kinase type-1 gamma (PIP5K1-gamma) (PtdIns(4)P-5-kinase 1 gamma) (EC 2.7.1.68) (Phosphatidylinositol 4-phosphate 5-kinase type I gamma) (PIP5KIgamma)	1.20909	0.00252007	Up	1.29616	0.00252007	Up
O70172	Pip4k2a Pi5p4ka Pip5k2a	Phosphatidylinositol 5-phosphate 4-kinase type-2 alpha (EC 2.7.1.149) (1-phosphatidylinositol 5-phosphate 4-kinase 2-alpha) (Diphosphoinositide kinase 2-alpha) (Phosphatidylinositol 5-Phosphate 4-Kinase) (PI5P4Kalpha) (Phosphatidylinositol 5-phosphate 4-kinase type II alpha) (PI(5)P 4-kinase type II alpha) (PIP4KII-alpha) (PtdIns(5)P-4-kinase isoform 2-alpha)	1.20601	0.0363078	Up
O70194	Eif3d Eif3s7	Eukaryotic translation initiation factor 3 subunit D (eIF3d) (Eukaryotic translation initiation factor 3 subunit 7) (eIF-3-zeta) (eIF3 p66)	0.88291	0.010878	Down
O70251	Eef1b Eef1b2	Elongation factor 1-beta (EF-1-beta)	0.927293	0.000777229	Down	0.891154	0.000777229	Down
O70305	Atxn2 Atx2 Sca2	Ataxin-2 (Spinocerebellar ataxia type 2 protein homolog)	1.05228	0.00501762	Up	1.09154	0.00501762	Up
O70318	Epb41l2 Epb4.1l2	Band 4.1-like protein 2 (Erythrocyte membrane protein band 4.1-like 2) (Generally expressed protein 4.1) (4.1G)				1.10167	0.0287409	Up
O70370	Ctss Cats	Cathepsin S (EC 3.4.22.27)	1.36558	0.00447797	Up	1.25732	0.00447797	Up
O70378	Emc8 Cox4al Cox4nb Noc4	ER membrane protein complex subunit 8 (Neighbor of COX4)	1.35856	0.0130883	Up	1.46338	0.0130883	Up
O70404	Vamp8	Vesicle-associated membrane protein 8 (VAMP-8) (Endobrevin) (Edb)				0.914804	0.00665072	Down
O70435	Psma3	Proteasome subunit alpha type-3 (Macropain subunit C8) (Multicatalytic endopeptidase complex subunit C8) (Proteasome component C8) (Proteasome subunit K)				0.869219	0.000358343	Down
O70469	Dok2 Frip	Docking protein 2 (Dok-related protein) (Dok-R) (Downstream of tyrosine kinase 2) (IL-four receptor-interacting protein) (FRIP) (p56(dok-2))	0.861555	0.0415737	Down	0.878031	0.0415737	Down
O70481	Ubr1	E3 ubiquitin-protein ligase UBR1 (EC 2.3.2.27) (N-recognin-1) (RING-type E3 ubiquitin transferase UBR1) (Ubiquitin-protein ligase E3-alpha-1) (Ubiquitin-protein ligase E3-alpha-I)	0.859353	0.000907673	Down	1.16072	0.000907673	Up
O70492	Snx3	Sorting nexin-3 (SDP3 protein)	1.10841	3.14287e-05	Up	1.3825	3.14287e-05	Up
O70566	Diaph2 Diap2	Protein diaphanous homolog 2 (Diaphanous-related formin-2) (DRF2) (mDia3)	0.797041	0.00880886	Down	0.755424	0.00880886	Down
O88271	Cfdp1 Bcnt Cfdp Cp27	Craniofacial development protein 1 (27 kDa craniofacial protein) (Bucentaur) (Protein Cp27)	0.958779	0.0291344	Down
O88342	Wdr1	WD repeat-containing protein 1 (Actin-interacting protein 1) (AIP1)				0.893548	0.00439839	Down
O88351	Ikbkb Ikkb	Inhibitor of nuclear factor kappa-B kinase subunit beta (I-kappa-B-kinase beta) (IKK-B) (IKK-beta) (IkBKB) (EC 2.7.11.10) (I-kappa-B kinase 2) (IKK2) (Nuclear factor NF-kappa-B inhibitor kinase beta) (NFKBIKB) (Serine/threonine protein kinase IKBKB) (EC 2.7.11.1)				1.35643	0.0140208	Up
O88396	Grpel2 Mt-grpel2	GrpE protein homolog 2, mitochondrial (Mt-GrpE#2)	0.836582	0.000626109	Down	0.751128	0.000626109	Down
O88447	Klc1 Kns2	Kinesin light chain 1 (KLC 1)				0.90394	0.0262023	Down
O88487	Dync1i2 Dnci2 Dncic2	Cytoplasmic dynein 1 intermediate chain 2 (Cytoplasmic dynein intermediate chain 2) (Dynein intermediate chain 2, cytosolic) (DH IC-2)	0.903315	0.000376148	Down	0.813524	0.000376148	Down
O88512	Ap1g2	AP-1 complex subunit gamma-like 2 (Gamma2-adaptin) (G2ad)				1.28037	0.00348495	Up
O88513	Gmnn	Geminin	1.71801	3.65404e-06	Up	1.69809	3.65404e-06	Up
O88520	Shoc2	Leucine-rich repeat protein SHOC-2 (Protein soc-2 homolog) (Protein sur-8 homolog)				0.78162	0.0319512	Down
O88531	Ppt1 Cln1 Ppt	Palmitoyl-protein thioesterase 1 (PPT-1) (EC 3.1.2.22) (Palmitoyl-protein hydrolase 1)	1.10682	0.00261363	Up
O88532	Zfr	Zinc finger RNA-binding protein	0.921688	0.0250329	Down
O88569	Hnrnpa2b1 Hnrpa2b1	Heterogeneous nuclear ribonucleoproteins A2/B1 (hnRNP A2/B1)				1.06999	0.00495427	Up
O88597	Becn1	Beclin-1 (Coiled-coil myosin-like BCL2-interacting protein) [Cleaved into: Beclin-1-C 35 kDa; Beclin-1-C 37 kDa]				1.21106	0.0467261	Up
O88630	Gosr1 Gs28	Golgi SNAP receptor complex member 1 (28 kDa Golgi SNARE protein) (28 kDa cis-Golgi SNARE p28) (GOS-28)				0.777625	0.00729312	Down
O88668	Creg1 Creg	Protein CREG1 (Cellular repressor of E1A-stimulated genes 1)	1.44952	0.000806803	Up	1.31783	0.000806803	Up
O88685	Psmc3 Tbp1	26S proteasome regulatory subunit 6A (26S proteasome AAA-ATPase subunit RPT5) (Proteasome 26S subunit ATPase 3) (Tat-binding protein 1) (TBP-1)				0.909552	0.00324477	Down
O88696	Clpp	ATP-dependent Clp protease proteolytic subunit, mitochondrial (EC 3.4.21.92) (Endopeptidase Clp)	0.91378	4.08275e-05	Down	0.66548	4.08275e-05	Down
O88708	Orc4 Orc4l	Origin recognition complex subunit 4				1.15907	0.0226751	Up
O88712	Ctbp1	C-terminal-binding protein 1 (CtBP1) (EC 1.1.1.-)	1.04611	0.00609633	Up
O88842	Fgd3	FYVE, RhoGEF and PH domain-containing protein 3	1.38435	0.000155424	Up	1.44043	0.000155424	Up
O88844	Idh1	Isocitrate dehydrogenase [NADP] cytoplasmic (IDH) (EC 1.1.1.42) (Cytosolic NADP-isocitrate dehydrogenase) (IDP) (NADP(+)-specific ICDH) (Oxalosuccinate decarboxylase)	1.21598	3.23543e-05	Up	1.13355	3.23543e-05	Up
O88845	Akap10	A-kinase anchor protein 10, mitochondrial (AKAP-10) (Dual specificity A kinase-anchoring protein 2) (D-AKAP-2) (Protein kinase A-anchoring protein 10) (PRKA10)	1.16	0.000853209	Up	1.35469	0.000853209	Up
O88879	Apaf1	Apoptotic protease-activating factor 1 (APAF-1)	1.07779	0.00368661	Up	1.12479	0.00368661	Up
O88974	Setdb1 Eset Kiaa0067	Histone-lysine N-methyltransferase SETDB1 (EC 2.1.1.366) (ERG-associated protein with SET domain) (ESET) (SET domain bifurcated 1)				1.14524	0.0488416	Up
O88986	Gcat Kbl	2-amino-3-ketobutyrate coenzyme A ligase, mitochondrial (AKB ligase) (EC 2.3.1.29) (Aminoacetone synthase) (Glycine acetyltransferase)				0.90377	0.0138609	Down
O89001	Cpd	Carboxypeptidase D (EC 3.4.17.22) (Metallocarboxypeptidase D) (gp180)				0.775968	0.0368826	Down
O89017	Lgmn Prsc1	Legumain (EC 3.4.22.34) (Asparaginyl endopeptidase) (Protease, cysteine 1)	1.38023	7.47193e-05	Up	1.61665	7.47193e-05	Up
O89023	Tpp1 Cln2	Tripeptidyl-peptidase 1 (TPP-1) (EC 3.4.14.9) (Lysosomal pepstatin-insensitive protease) (LPIC) (Tripeptidyl aminopeptidase) (Tripeptidyl-peptidase I) (TPP-I)	1.21806	0.0367758	Up
O89050	Mkln1	Muskelin	0.804478	0.0171117	Down
O89079	Cope Cope1	Coatomer subunit epsilon (Epsilon-coat protein) (Epsilon-COP)				1.19956	0.000214098	Up
O89110	Casp8	Caspase-8 (CASP-8) (EC 3.4.22.61) [Cleaved into: Caspase-8 subunit p18; Caspase-8 subunit p10]	0.870589	2.37137e-05	Down	0.768899	2.37137e-05	Down
P00375	Dhfr	Dihydrofolate reductase (EC 1.5.1.3)	1.22548	0.00206187	Up	1.35657	0.00206187	Up
P00493	Hprt1 Hprt	Hypoxanthine-guanine phosphoribosyltransferase (HGPRT) (HGPRTase) (EC 2.4.2.8) (HPRT B)	1.13757	0.0116513	Up	1.1583	0.0116513	Up
P00860	Odc1 Odc	Ornithine decarboxylase (ODC) (EC 4.1.1.17)	0.763717	9.17642e-06	Down	0.583827	9.17642e-06	Down
P00920	Ca2 Car2	Carbonic anhydrase 2 (EC 4.2.1.1) (Carbonate dehydratase II) (Carbonic anhydrase II) (CA-II)	1.21236	0.0342891	Up	1.25559	0.0342891	Up
P01027	C3	Complement C3 (HSE-MSF) [Cleaved into: Complement C3 beta chain; C3-beta-c (C3bc); Complement C3 alpha chain; C3a anaphylatoxin; Acylation stimulating protein (ASP) (C3adesArg); Complement C3b alpha' chain; Complement C3c alpha' chain fragment 1; Complement C3dg fragment; Complement C3g fragment; Complement C3d fragment; Complement C3f fragment; Complement C3c alpha' chain fragment 2]	0.806746	0.000666824	Down	0.628778	0.000666824	Down
P01582	Il1a	Interleukin-1 alpha (IL-1 alpha)	0.637649	0.00108119	Down	0.792027	0.00108119	Down
P02468	Lamc1 Lamb-2 Lamc-1	Laminin subunit gamma-1 (Laminin B2 chain) (Laminin-1 subunit gamma) (Laminin-10 subunit gamma) (Laminin-11 subunit gamma) (Laminin-2 subunit gamma) (Laminin-3 subunit gamma) (Laminin-4 subunit gamma) (Laminin-6 subunit gamma) (Laminin-7 subunit gamma) (Laminin-8 subunit gamma) (Laminin-9 subunit gamma) (S-laminin subunit gamma) (S-LAM gamma)	0.64755	3.18663e-05	Down	0.689319	3.18663e-05	Down
P02535	Krt10 Krt1-10	Keratin, type I cytoskeletal 10 (56 kDa cytokeratin) (Cytokeratin-10) (CK-10) (Keratin, type I cytoskeletal 59 kDa) (Keratin-10) (K10)				0.745795	0.0410038	Down
P03958	Ada	Adenosine deaminase (EC 3.5.4.4) (Adenosine aminohydrolase)	1.25579	0.0261425	Up	1.26121	0.0261425	Up
P03966	Mycn Nmyc Nmyc1	N-myc proto-oncogene protein	1.15487	0.00181936	Up	1.34564	0.00181936	Up
P04117	Fabp4 Ap2	Fatty acid-binding protein, adipocyte (3T3-L1 lipid-binding protein) (Adipocyte lipid-binding protein) (ALBP) (Adipocyte-type fatty acid-binding protein) (A-FABP) (AFABP) (Fatty acid-binding protein 4) (Myelin P2 protein homolog) (P15) (P2 adipocyte protein) (Protein 422)	0.907562	1.33098e-05	Down	0.587116	1.33098e-05	Down
P04202	Tgfb1	Transforming growth factor beta-1 proprotein [Cleaved into: Latency-associated peptide (LAP); Transforming growth factor beta-1 (TGF-beta-1)]	0.731762	6.11388e-05	Down	0.680468	6.11388e-05	Down
P05063	Aldoc Aldo3 Scrg2	Fructose-bisphosphate aldolase C (EC 4.1.2.13) (Aldolase 3) (Brain-type aldolase) (Scrapie-responsive protein 2) (Zebrin II)	1.12206	0.00250042	Up	1.08294	0.00250042	Up
P05064	Aldoa Aldo1	Fructose-bisphosphate aldolase A (EC 4.1.2.13) (Aldolase 1) (Muscle-type aldolase)	1.04112	0.00292924	Up
P05202	Got2 Got-2	Aspartate aminotransferase, mitochondrial (mAspAT) (EC 2.6.1.1) (EC 2.6.1.7) (Fatty acid-binding protein) (FABP-1) (Glutamate oxaloacetate transaminase 2) (Kynurenine aminotransferase 4) (Kynurenine aminotransferase IV) (Kynurenine--oxoglutarate transaminase 4) (Kynurenine--oxoglutarate transaminase IV) (Plasma membrane-associated fatty acid-binding protein) (FABPpm) (Transaminase A)				0.808461	0.002169	Down
P05555	Itgam	Integrin alpha-M (CD11 antigen-like family member B) (CR-3 alpha chain) (Cell surface glycoprotein MAC-1 subunit alpha) (Leukocyte adhesion receptor MO1) (CD antigen CD11b)				0.65161	0.0277015	Down
P06151	Ldha Ldh-1 Ldh1	L-lactate dehydrogenase A chain (LDH-A) (EC 1.1.1.27) (LDH muscle subunit) (LDH-M)	1.09653	0.0195328	Up
P06745	Gpi Gpi1	Glucose-6-phosphate isomerase (GPI) (EC 5.3.1.9) (Autocrine motility factor) (AMF) (Neuroleukin) (NLK) (Phosphoglucose isomerase) (PGI) (Phosphohexose isomerase) (PHI)	1.09732	0.0113643	Up	1.06499	0.0113643	Up
P06804	Tnf Tnfa Tnfsf2	Tumor necrosis factor (Cachectin) (TNF-alpha) (Tumor necrosis factor ligand superfamily member 2) (TNF-a) [Cleaved into: Tumor necrosis factor, membrane form (N-terminal fragment) (NTF); Intracellular domain 1 (ICD1); Intracellular domain 2 (ICD2); C-domain 1; C-domain 2; Tumor necrosis factor, soluble form]	0.683925	0.00048415	Down	0.764463	0.00048415	Down
P07091	S100a4 Capl Mts1	Protein S100-A4 (Metastasin) (Metastatic cell protein) (PEL98) (Placental calcium-binding protein) (Protein 18A2) (Protein Mts1) (S100 calcium-binding protein A4)	1.15334	0.000248094	Up	1.26354	0.000248094	Up
P07146	Prss2 Try2	Anionic trypsin-2 (EC 3.4.21.4) (Anionic trypsin II) (Pretrypsinogen II) (Serine protease 2)				0.696076	0.0267221	Down
P07356	Anxa2 Anx2 Cal1h	Annexin A2 (Annexin II) (Annexin-2) (Calpactin I heavy chain) (Calpactin-1 heavy chain) (Chromobindin-8) (Lipocortin II) (Placental anticoagulant protein IV) (PAP-IV) (Protein I) (p36)				0.824682	8.15936e-05	Down
P07607	Tyms	Thymidylate synthase (TS) (TSase) (EC 2.1.1.45)	1.18249	3.04631e-05	Up	1.41358	3.04631e-05	Up
P07742	Rrm1	Ribonucleoside-diphosphate reductase large subunit (EC 1.17.4.1) (Ribonucleoside-diphosphate reductase subunit M1) (Ribonucleotide reductase large subunit)	1.19786	2.19787e-06	Up	1.33225	2.19787e-06	Up
P07901	Hsp90aa1 Hsp86 Hsp86-1 Hspca	Heat shock protein HSP 90-alpha (EC 3.6.4.10) (Heat shock 86 kDa) (HSP 86) (HSP86) (Tumor-specific transplantation 86 kDa antigen) (TSTA)	0.964083	6.74837e-05	Down	0.867288	6.74837e-05	Down
P08003	Pdia4 Cai Erp72	Protein disulfide-isomerase A4 (EC 5.3.4.1) (Endoplasmic reticulum resident protein 72) (ER protein 72) (ERp-72) (ERp72)	1.03892	5.27387e-05	Up	0.897538	5.27387e-05	Down
P08103	Hck	Tyrosine-protein kinase HCK (EC 2.7.10.2) (B-cell/myeloid kinase) (BMK) (Hematopoietic cell kinase) (Hemopoietic cell kinase) (p56-HCK/p59-HCK)	0.728125	0.000174094	Down	0.765131	0.000174094	Down
P08113	Hsp90b1 Grp94 Tra-1 Tra1	Endoplasmin (94 kDa glucose-regulated protein) (GRP-94) (Endoplasmic reticulum resident protein 99) (ERp99) (Heat shock protein 90 kDa beta member 1) (Polymorphic tumor rejection antigen 1) (Tumor rejection antigen gp96)				0.914492	0.000305838	Down
P08249	Mdh2 Mor1	Malate dehydrogenase, mitochondrial (EC 1.1.1.37)	0.926163	2.42959e-05	Down	0.698107	2.42959e-05	Down
P08775	Polr2a Rpii215 Rpo2-1	DNA-directed RNA polymerase II subunit RPB1 (RNA polymerase II subunit B1) (EC 2.7.7.6) (DNA-directed RNA polymerase II subunit A) (DNA-directed RNA polymerase III largest subunit)				1.20472	0.0395162	Up
P08905	Lyz2 Lyz Lyzs	Lysozyme C-2 (EC 3.2.1.17) (1,4-beta-N-acetylmuramidase C) (Lysozyme C type M)	1.34759	0.00551169	Up	1.22014	0.00551169	Up
P09103	P4hb Pdia1	Protein disulfide-isomerase (PDI) (EC 5.3.4.1) (Cellular thyroid hormone-binding protein) (Endoplasmic reticulum resident protein 59) (ER protein 59) (ERp59) (Prolyl 4-hydroxylase subunit beta) (p55)				0.80404	0.00193859	Down
P09405	Ncl Nuc	Nucleolin (Protein C23)				1.07442	0.00133153	Up
P09411	Pgk1 Pgk-1	Phosphoglycerate kinase 1 (EC 2.7.2.3)				0.922932	0.00710781	Down
P09450	Junb Jun-b	Transcription factor jun-B (MyD21)	0.712908	3.7678e-06	Down	0.76788	3.7678e-06	Down
P09528	Fth1 Fth	Ferritin heavy chain (Ferritin H subunit) (EC 1.16.3.1) [Cleaved into: Ferritin heavy chain, N-terminally processed]				1.30748	0.00176554	Up
P09671	Sod2 Sod-2	Superoxide dismutase [Mn], mitochondrial (EC 1.15.1.1)	0.839665	2.02575e-05	Down	0.602591	2.02575e-05	Down
P0DOV2	Ifi204	Interferon-activable protein 204 (Ifi-204) (Interferon-inducible protein p204)	0.812583	0.000647688	Down	0.695003	0.000647688	Down
P0DP27	Calm2 Cam2 CamC	Calmodulin-2				0.969004	0.0268669	Down
P10126	Eef1a1 Eef1a	Elongation factor 1-alpha 1 (EF-1-alpha-1) (Elongation factor Tu) (EF-Tu) (Eukaryotic elongation factor 1 A-1) (eEF1A-1)	0.919299	0.00318498	Down	0.909836	0.00318498	Down
P10404		MLV-related proviral Env polyprotein [Cleaved into: Surface protein (SU); Transmembrane protein (TM)]	1.34742	0.000195035	Up	1.41417	0.000195035	Up
P10605	Ctsb	Cathepsin B (EC 3.4.22.1) (Cathepsin B1) [Cleaved into: Cathepsin B light chain; Cathepsin B heavy chain]				0.860224	0.015951	Down
P10630	Eif4a2 Ddx2b	Eukaryotic initiation factor 4A-II (eIF-4A-II) (eIF4A-II) (EC 3.6.4.13) (ATP-dependent RNA helicase eIF4A-2)	0.842631	0.000386985	Down	0.794215	0.000386985	Down
P10810	Cd14	Monocyte differentiation antigen CD14 (Myeloid cell-specific leucine-rich glycoprotein) (CD antigen CD14)	0.679519	0.000270359	Down	0.733468	0.000270359	Down
P10889	Cxcl2 Mip-2 Mip2 Scyb2	C-X-C motif chemokine 2 (Macrophage inflammatory protein 2) (MIP2)	0.6596	4.13745e-05	Down	0.682293	4.13745e-05	Down
P10922	H1-0 H1f0 H1fv	Histone H1.0 (Histone H1') (Histone H1(0)) (MyD196) [Cleaved into: Histone H1.0, N-terminally processed]	0.897559	2.66016e-05	Down	0.74574	2.66016e-05	Down
P11103	Parp1 Adprp Adprt Adprt1	Poly [ADP-ribose] polymerase 1 (PARP-1) (EC 2.4.2.30) (ADP-ribosyltransferase diphtheria toxin-like 1) (ARTD1) (DNA ADP-ribosyltransferase PARP1) (EC 2.4.2.-) (NAD(+) ADP-ribosyltransferase 1) (ADPRT 1) (Poly[ADP-ribose] synthase 1) (msPARP) (Protein poly-ADP-ribosyltransferase PARP1) (EC 2.4.2.-)	1.30492	2.2388e-05	Up	1.37923	2.2388e-05	Up
P11152	Lpl	Lipoprotein lipase (LPL) (EC 3.1.1.34) (Phospholipase A1) (EC 3.1.1.32)	0.593485	1.57666e-06	Down
P11157	Rrm2	Ribonucleoside-diphosphate reductase subunit M2 (EC 1.17.4.1) (Ribonucleotide reductase small chain) (Ribonucleotide reductase small subunit)	1.34028	0.000673057	Up	1.26878	0.000673057	Up
P11352	Gpx1	Glutathione peroxidase 1 (GPx-1) (GSHPx-1) (EC 1.11.1.9) (Cellular glutathione peroxidase) (Selenium-dependent glutathione peroxidase 1)				0.837845	0.0388809	Down
P11438	Lamp1 Lamp-1	Lysosome-associated membrane glycoprotein 1 (LAMP-1) (Lysosome-associated membrane protein 1) (120 kDa lysosomal membrane glycoprotein) (CD107 antigen-like family member A) (LGP-120) (Lysosomal membrane glycoprotein A) (LGP-A) (P2B) (CD antigen CD107a)				0.773932	0.0115088	Down
P11440	Cdk1 Cdc2 Cdc2a Cdkn1	Cyclin-dependent kinase 1 (CDK1) (EC 2.7.11.22) (EC 2.7.11.23) (Cell division control protein 2 homolog) (Cell division protein kinase 1) (p34 protein kinase)	1.12571	0.000433091	Up	1.42445	0.000433091	Up
P11499	Hsp90ab1 Hsp84 Hsp84-1 Hspcb	Heat shock protein HSP 90-beta (Heat shock 84 kDa) (HSP 84) (HSP84) (Tumor-specific transplantation 84 kDa antigen) (TSTA)	0.934937	0.000401703	Down	0.859008	0.000401703	Down
P11680	Cfp Pfc	Properdin (Complement factor P)	0.748978	0.000321359	Down	0.621601	0.000321359	Down
P11835	Itgb2	Integrin beta-2 (Cell surface adhesion glycoproteins LFA-1/CR3/p150,95 subunit beta) (Complement receptor C3 subunit beta) (CD antigen CD18)				0.695168	0.00743311	Down
P12388	Serpinb2 Pai2 Planh2	Plasminogen activator inhibitor 2, macrophage (PAI-2) (Serpin B2)	0.90933	1.49802e-07	Down	0.602511	1.49802e-07	Down
P12787	Cox5a	Cytochrome c oxidase subunit 5A, mitochondrial (Cytochrome c oxidase polypeptide Va)	0.936976	8.09454e-05	Down	0.68871	8.09454e-05	Down
P13020	Gsn Gsb	Gelsolin (Actin-depolymerizing factor) (ADF) (Brevin)	1.12321	0.00327791	Up
P13439	Umps	Uridine 5'-monophosphate synthase (UMP synthase) [Includes: Orotate phosphoribosyltransferase (OPRTase) (EC 2.4.2.10); Orotidine 5'-phosphate decarboxylase (EC 4.1.1.23) (OMPdecase)]				1.20997	0.00508429	Up
P13864	Dnmt1 Dnmt Met1 Uim	DNA (cytosine-5)-methyltransferase 1 (Dnmt1) (Met-1) (EC 2.1.1.37) (DNA methyltransferase MmuI) (DNA MTase MmuI) (M.MmuI) (MCMT)	1.17289	0.000435283	Up	1.4135	0.000435283	Up
P14069	S100a6 Cacy	Protein S100-A6 (5B10) (Calcyclin) (Prolactin receptor-associated protein) (S100 calcium-binding protein A6)	1.11133	0.00522174	Up
P14211	Calr	Calreticulin (CRP55) (Calregulin) (Endoplasmic reticulum resident protein 60) (ERp60) (HACBP)				1.14443	0.0190496	Up
P14685	Psmd3 P91a Tstap91a	26S proteasome non-ATPase regulatory subunit 3 (26S proteasome regulatory subunit RPN3) (26S proteasome regulatory subunit S3) (Proteasome subunit p58) (Transplantation antigen P91A) (Tum-P91A antigen)				0.850577	0.0360233	Down
P14733	Lmnb1	Lamin-B1	1.19692	3.23543e-05	Up	1.46378	3.23543e-05	Up
P14824	Anxa6 Anx6	Annexin A6 (67 kDa calelectrin) (Annexin VI) (Annexin-6) (Calphobindin-II) (CPB-II) (Chromobindin-20) (Lipocortin VI) (Protein III) (p68) (p70)				0.846384	0.00236705	Down
P14869	Rplp0 Arbp	60S acidic ribosomal protein P0 (60S ribosomal protein L10E)	0.955456	0.0192699	Down
P14901	Hmox1	Heme oxygenase 1 (HO-1) (EC 1.14.14.18) (P32 protein)				0.7083	0.00237927	Down
P15307	Rel	Proto-oncogene c-Rel	0.702697	0.00522335	Down	0.83489	0.00522335	Down
P15379	Cd44 Ly-24	CD44 antigen (Extracellular matrix receptor III) (ECMR-III) (GP90 lymphocyte homing/adhesion receptor) (HUTCH-I) (Hermes antigen) (Hyaluronate receptor) (Lymphocyte antigen 24) (Ly-24) (Phagocytic glycoprotein 1) (PGP-1) (Phagocytic glycoprotein I) (PGP-I) (CD antigen CD44)	0.808123	0.000934485	Down	0.676451	0.000934485	Down
P16045	Lgals1 Gbp	Galectin-1 (Gal-1) (14 kDa lectin) (Beta-galactoside-binding lectin L-14-I) (Galaptin) (Lactose-binding lectin 1) (Lectin galactoside-binding soluble 1) (S-Lac lectin 1)				0.74997	8.77083e-05	Down
P16332	Mmut Mut	Methylmalonyl-CoA mutase, mitochondrial (MCM) (EC 5.4.99.2) (Methylmalonyl-CoA isomerase)				0.913211	0.0075849	Down
P16460	Ass1 Ass	Argininosuccinate synthase (EC 6.3.4.5) (Citrulline--aspartate ligase)	0.818372	0.000417234	Down	0.665132	0.000417234	Down
P16546	Sptan1 Spna2 Spta2	Spectrin alpha chain, non-erythrocytic 1 (Alpha-II spectrin) (Fodrin alpha chain)	1.08629	0.00105944	Up	1.03951	0.00105944	Up
P16675	Ctsa Ppgb	Lysosomal protective protein (EC 3.4.16.5) (Carboxypeptidase C) (Carboxypeptidase L) (Cathepsin A) (Protective protein cathepsin A) (PPCA) (Protective protein for beta-galactosidase) [Cleaved into: Lysosomal protective protein 32 kDa chain; Lysosomal protective protein 20 kDa chain]	1.09281	0.000756734	Up	1.17304	0.000756734	Up
P16879	Fes Fps	Tyrosine-protein kinase Fes/Fps (EC 2.7.10.2) (Proto-oncogene c-Fes)	1.201	5.92432e-05	Up	1.42246	5.92432e-05	Up
P17047	Lamp2 Lamp-2	Lysosome-associated membrane glycoprotein 2 (LAMP-2) (Lysosome-associated membrane protein 2) (CD107 antigen-like family member B) (Lysosomal membrane glycoprotein type B) (LGP-B) (CD antigen CD107b)	1.07324	6.48277e-05	Up	0.752567	6.48277e-05	Down
P17095	Hmga1 Hmgi Hmgiy	High mobility group protein HMG-I/HMG-Y (HMG-I(Y)) (High mobility group AT-hook protein 1) (High mobility group protein A1)				0.554541	1.97781e-07	Down
P17182	Eno1 Eno-1	Alpha-enolase (EC 4.2.1.11) (2-phospho-D-glycerate hydro-lyase) (Enolase 1) (Non-neural enolase) (NNE)	1.06046	0.0232212	Up
P17225	Ptbp1 Ptb	Polypyrimidine tract-binding protein 1 (PTB) (Heterogeneous nuclear ribonucleoprotein I) (hnRNP I)				1.10503	0.0270544	Up
P17433	Spi1 Sfpi-1 Sfpi1	Transcription factor PU.1 (31 kDa-transforming protein) (SFFV proviral integration 1 protein)				1.30155	0.00714203	Up
P17439	Gba	Lysosomal acid glucosylceramidase (Lysosomal acid GCase) (EC 3.2.1.45) (Acid beta-glucosidase) (Beta-glucocerebrosidase) (Cholesterol glucosyltransferase) (SGTase) (EC 2.4.1.-) (Cholesteryl-beta-glucosidase) (EC 3.2.1.-) (D-glucosyl-N-acylsphingosine glucohydrolase)	1.1882	0.0217867	Up
P17710	Hk1	Hexokinase-1 (EC 2.7.1.1) (Hexokinase type I) (HK I) (Hexokinase, tumor isozyme)				0.821842	0.00180953	Down
P17751	Tpi1 Tpi	Triosephosphate isomerase (TIM) (EC 5.3.1.1) (Methylglyoxal synthase) (EC 4.2.3.3) (Triose-phosphate isomerase)	1.16946	0.000931987	Up	1.21695	0.000931987	Up
P17809	Slc2a1 Glut1	Solute carrier family 2, facilitated glucose transporter member 1 (Glucose transporter type 1, erythrocyte/brain) (GLUT-1) (GT1)				0.679102	0.00548206	Down
P17918	Pcna	Proliferating cell nuclear antigen (PCNA) (Cyclin)	1.0776	0.022098	Up	1.08386	0.022098	Up
P18155	Mthfd2 Nmdmc	Bifunctional methylenetetrahydrofolate dehydrogenase/cyclohydrolase, mitochondrial [Includes: NAD-dependent methylenetetrahydrofolate dehydrogenase (EC 1.5.1.15); Methenyltetrahydrofolate cyclohydrolase (EC 3.5.4.9)]	0.931578	6.202e-05	Down	0.770351	6.202e-05	Down
P18242	Ctsd	Cathepsin D (EC 3.4.23.5)				0.814871	0.000310655	Down
P18572	Bsg	Basigin (Basic immunoglobulin superfamily) (HT7 antigen) (Membrane glycoprotein gp42) (CD antigen CD147)				0.705737	0.00587363	Down
P18653	Rps6ka1 Mapkapk1a Rsk1	Ribosomal protein S6 kinase alpha-1 (S6K-alpha-1) (EC 2.7.11.1) (90 kDa ribosomal protein S6 kinase 1) (p90-RSK 1) (p90RSK1) (p90S6K) (MAP kinase-activated protein kinase 1a) (MAPK-activated protein kinase 1a) (MAPKAP kinase 1a) (MAPKAPK-1a) (Ribosomal S6 kinase 1) (RSK-1)				1.29556	0.0115088	Up
P18760	Cfl1	Cofilin-1 (Cofilin, non-muscle isoform)	0.97791	3.02084e-05	Down	0.909585	3.02084e-05	Down
P19096	Fasn	Fatty acid synthase (EC 2.3.1.85) (Type I Fatty Acid Synthase) [Includes: [Acyl-carrier-protein] S-acetyltransferase (EC 2.3.1.38); [Acyl-carrier-protein] S-malonyltransferase (EC 2.3.1.39); 3-oxoacyl-[acyl-carrier-protein] synthase (EC 2.3.1.41); 3-oxoacyl-[acyl-carrier-protein] reductase (EC 1.1.1.100); 3-hydroxyacyl-[acyl-carrier-protein] dehydratase (EC 4.2.1.59); Enoyl-[acyl-carrier-protein]…	1.05008	0.000907015	Up	1.15921	0.000907015	Up
P19536	Cox5b	Cytochrome c oxidase subunit 5B, mitochondrial (Cytochrome c oxidase polypeptide Vb)	1.07448	0.000934143	Up	0.869464	0.000934143	Down
P19783	Cox4i1 Cox4 Cox4a	Cytochrome c oxidase subunit 4 isoform 1, mitochondrial (Cytochrome c oxidase polypeptide IV) (Cytochrome c oxidase subunit IV isoform 1) (COX IV-1)	0.921501	1.95201e-05	Down	0.646917	1.95201e-05	Down
P19973	Lsp1 Pp52 S37 Wp34	Lymphocyte-specific protein 1 (52 kDa phosphoprotein) (pp52) (Lymphocyte-specific antigen WP34) (S37 protein)	1.21395	0.00124104	Up	1.33269	0.00124104	Up
P20029	Hspa5 Grp78	Endoplasmic reticulum chaperone BiP (EC 3.6.4.10) (78 kDa glucose-regulated protein) (GRP-78) (Binding-immunoglobulin protein) (BiP) (Heat shock protein 70 family protein 5) (HSP70 family protein 5) (Heat shock protein family A member 5) (Immunoglobulin heavy chain-binding protein)	0.910677	1.74082e-05	Down	0.710557	1.74082e-05	Down
P20060	Hexb	Beta-hexosaminidase subunit beta (EC 3.2.1.52) (Beta-N-acetylhexosaminidase subunit beta) (Hexosaminidase subunit B) (N-acetyl-beta-glucosaminidase subunit beta)	1.42586	6.98767e-05	Up	1.52132	6.98767e-05	Up
P20108	Prdx3 Aop1 Mer5	Thioredoxin-dependent peroxide reductase, mitochondrial (EC 1.11.1.24) (Antioxidant protein 1) (AOP-1) (PRX III) (Perioredoxin-3) (Protein MER5) (Thioredoxin-dependent peroxiredoxin 3)				0.730259	0.000293872	Down
P20152	Vim	Vimentin				0.779672	0.000860264	Down
P20664	Prim1	DNA primase small subunit (EC 2.7.7.-) (DNA primase 49 kDa subunit) (p49)				1.2495	0.0123412	Up
P21107	Tpm3 Tpm-5 Tpm5	Tropomyosin alpha-3 chain (Gamma-tropomyosin) (Tropomyosin-3)	0.946971	0.00040231	Down	0.871229	0.00040231	Down
P21126	Ubl4a Gdx Ubl4	Ubiquitin-like protein 4A (Ubiquitin-like protein GDX)	0.885478	0.0210382	Down
P21460	Cst3	Cystatin-C (Cystatin-3)				1.18637	0.000214098	Up
P21550	Eno3 Eno-3	Beta-enolase (EC 4.2.1.11) (2-phospho-D-glycerate hydro-lyase) (Enolase 3) (Muscle-specific enolase) (MSE) (Skeletal muscle enolase)	1.17626	0.0214516	Up	1.23081	0.0214516	Up
P21981	Tgm2	Protein-glutamine gamma-glutamyltransferase 2 (EC 2.3.2.13) (Isopeptidase TGM2) (EC 3.4.-.-) (Protein-glutamine deamidase TGM2) (EC 3.5.1.44) (Protein-glutamine dopaminyltransferase TGM2) (EC 2.3.1.-) (Protein-glutamine histaminyltransferase TGM2) (EC 2.3.1.-) (Protein-glutamine noradrenalinyltransferase TGM2) (EC 2.3.1.-) (Protein-glutamine serotonyltransferase TGM2) (EC 2.3.1.-) (Tissue transgl…				0.773613	0.0016806	Down
P22907	Hmbs Uros1	Porphobilinogen deaminase (PBG-D) (EC 2.5.1.61) (Hydroxymethylbilane synthase) (HMBS) (Pre-uroporphyrinogen synthase)	1.16144	0.00851035	Up	1.10824	0.00851035	Up
P23116	Eif3a Csma Eif3 Eif3s10	Eukaryotic translation initiation factor 3 subunit A (eIF3a) (Centrosomin) (Eukaryotic translation initiation factor 3 subunit 10) (eIF-3-theta) (eIF3 p167) (eIF3 p180) (eIF3 p185) (p162)	0.950903	0.00640202	Down	1.04773	0.00640202	Up
P23198	Cbx3	Chromobox protein homolog 3 (Heterochromatin protein 1 homolog gamma) (HP1 gamma) (M32) (Modifier 2 protein)				0.880405	0.00938526	Down
P23249	Mov10 Gb110	Putative helicase MOV-10 (EC 3.6.4.13) (Moloney leukemia virus 10 protein)	0.887909	5.2722e-05	Down	0.733579	5.2722e-05	Down
P23475	Xrcc6 G22p1 Ku70	X-ray repair cross-complementing protein 6 (EC 3.6.4.-) (EC 4.2.99.-) (5'-deoxyribose-5-phosphate lyase Ku70) (5'-dRP/AP lyase Ku70) (ATP-dependent DNA helicase 2 subunit 1) (ATP-dependent DNA helicase II 70 kDa subunit) (CTC box-binding factor 75 kDa subunit) (CTC75) (CTCBF) (DNA repair protein XRCC6) (Ku autoantigen protein p70 homolog) (Ku70)	1.12227	0.00134465	Up	1.29079	0.00134465	Up
P23492	Pnp Np Pnp1	Purine nucleoside phosphorylase (PNP) (EC 2.4.2.1) (Inosine phosphorylase) (Inosine-guanosine phosphorylase)	0.857497	0.000121421	Down	0.657153	0.000121421	Down
P23611	Irf8 Icsbp Icsbp1	Interferon regulatory factor 8 (IRF-8) (Interferon consensus sequence-binding protein) (ICSBP)	0.665507	0.00271755	Down
P23738	Hdc	Histidine decarboxylase (HDC) (EC 4.1.1.22)	0.554636	0.000160248	Down	0.844381	0.000160248	Down
P24270	Cat Cas-1 Cas1	Catalase (EC 1.11.1.6)				0.72874	0.000101541	Down
P24369	Ppib	Peptidyl-prolyl cis-trans isomerase B (PPIase B) (EC 5.2.1.8) (CYP-S1) (Cyclophilin B) (Rotamase B) (S-cyclophilin) (SCYLP)	1.16426	0.00331219	Up	1.25257	0.00331219	Up
P24452	Capg Mbh1	Macrophage-capping protein (Actin regulatory protein CAP-G) (Actin-capping protein GCAP39) (Myc basic motif homolog 1)				0.973201	0.017865	Down
P24527	Lta4h	Leukotriene A-4 hydrolase (LTA-4 hydrolase) (EC 3.3.2.6) (Leukotriene A(4) hydrolase) (Tripeptide aminopeptidase LTA4H) (EC 3.4.11.4)	1.07169	0.00246253	Up	1.08252	0.00246253	Up
P24547	Impdh2	Inosine-5'-monophosphate dehydrogenase 2 (IMP dehydrogenase 2) (IMPD 2) (IMPDH 2) (EC 1.1.1.205) (IMPDH-II)				1.06374	0.00722195	Up
P24668	M6pr 46mpr	Cation-dependent mannose-6-phosphate receptor (CD Man-6-P receptor) (CD-MPR) (46 kDa mannose 6-phosphate receptor) (MPR 46)				0.806119	0.0114937	Down
P25085	Il1rn Il-1ra	Interleukin-1 receptor antagonist protein (IL-1RN) (IL-1ra) (IRAP) (IL1 inhibitor)	0.852484	9.16357e-05	Down	0.587751	9.16357e-05	Down
P25206	Mcm3 Mcmd Mcmd3	DNA replication licensing factor MCM3 (EC 3.6.4.12) (DNA polymerase alpha holoenzyme-associated protein P1) (P1-MCM3)	1.21125	9.91375e-05	Up	1.42362	9.91375e-05	Up
P25425	Pou2f1 Oct-1 Otf-1 Otf1	POU domain, class 2, transcription factor 1 (NF-A1) (Octamer-binding protein 1) (Oct-1) (Octamer-binding transcription factor 1) (OTF-1)	1.49289	5.92432e-05	Up	1.4497	5.92432e-05	Up
P25799	Nfkb1	Nuclear factor NF-kappa-B p105 subunit (DNA-binding factor KBF1) (EBP-1) (NF-kappa-B1 p84/NF-kappa-B1 p98) (Nuclear factor of kappa light polypeptide gene enhancer in B-cells 1) [Cleaved into: Nuclear factor NF-kappa-B p50 subunit]	0.850509	0.0253526	Down
P25911	Lyn	Tyrosine-protein kinase Lyn (EC 2.7.10.2) (V-yes-1 Yamaguchi sarcoma viral related oncogene homolog) (p53Lyn) (p56Lyn)				0.628283	0.00320307	Down
P25976	Ubtf Tcfubf Ubf-1 Ubf1	Nucleolar transcription factor 1 (Upstream-binding factor 1) (UBF-1)	1.19876	0.00205297	Up	1.41134	0.00205297	Up
P26039	Tln1 Tln	Talin-1	0.921292	1.48457e-05	Down	0.831464	1.48457e-05	Down
P26041	Msn	Moesin (Membrane-organizing extension spike protein)	0.931213	8.30194e-06	Down	0.751446	8.30194e-06	Down
P26443	Glud1 Glud	Glutamate dehydrogenase 1, mitochondrial (GDH 1) (EC 1.4.1.3)	0.922265	0.000310655	Down	0.756458	0.000310655	Down
P26450	Pik3r1	Phosphatidylinositol 3-kinase regulatory subunit alpha (PI3-kinase regulatory subunit alpha) (PI3K regulatory subunit alpha) (PtdIns-3-kinase regulatory subunit alpha) (Phosphatidylinositol 3-kinase 85 kDa regulatory subunit alpha) (PI3-kinase subunit p85-alpha) (PtdIns-3-kinase regulatory subunit p85-alpha)	1.23067	0.00587393	Up	1.42104	0.00587393	Up
P26638	Sars1 Sars Sers	Serine--tRNA ligase, cytoplasmic (EC 6.1.1.11) (Seryl-tRNA synthetase) (SerRS) (Seryl-tRNA(Ser/Sec) synthetase)	1.03275	0.00138079	Up	0.944406	0.00138079	Down
P26883	Fkbp1a Fkbp1	Peptidyl-prolyl cis-trans isomerase FKBP1A (PPIase FKBP1A) (EC 5.2.1.8) (12 kDa FK506-binding protein) (12 kDa FKBP) (FKBP-12) (Calstabin-1) (FK506-binding protein 1A) (FKBP-1A) (Immunophilin FKBP12) (Rotamase)	0.956194	0.0240576	Down	0.968632	0.0240576	Down
P27546	Map4 Mtap4	Microtubule-associated protein 4 (MAP-4)				0.93579	0.00214877	Down
P27601	Gna13 Gna-13	Guanine nucleotide-binding protein subunit alpha-13 (G alpha-13) (G-protein subunit alpha-13)				0.720154	0.0204571	Down
P27641	Xrcc5 G22p2	X-ray repair cross-complementing protein 5 (EC 3.6.4.-) (ATP-dependent DNA helicase 2 subunit 2) (ATP-dependent DNA helicase II 80 kDa subunit) (CTC box-binding factor 85 kDa subunit) (CTC85) (CTCBF) (DNA repair protein XRCC5) (Ku autoantigen protein p86 homolog) (Ku80) (Nuclear factor IV)				1.33534	0.00874762	Up
P27659	Rpl3	60S ribosomal protein L3 (J1 protein)	0.944132	0.00744278	Down
P27870	Vav1 Vav	Proto-oncogene vav (p95vav)				1.17211	0.00529298	Up
P28063	Psmb8 Lmp7 Mc13	Proteasome subunit beta type-8 (EC 3.4.25.1) (Low molecular mass protein 7) (Macropain subunit C13) (Multicatalytic endopeptidase complex subunit C13) (Proteasome component C13) (Proteasome subunit beta-5i)	0.947359	0.000303803	Down	0.79518	0.000303803	Down
P28271	Aco1 Ireb1 Irebp	Cytoplasmic aconitate hydratase (Aconitase) (EC 4.2.1.3) (Citrate hydro-lyase) (Iron regulatory protein 1) (IRP1) (Iron-responsive element-binding protein 1) (IRE-BP 1)	1.2076	0.00130553	Up	1.32542	0.00130553	Up
P28352	Apex1 Ape Apex Ref1	DNA-(apurinic or apyrimidinic site) endonuclease (EC 3.1.-.-) (APEX nuclease) (APEN) (Apurinic-apyrimidinic endonuclease 1) (AP endonuclease 1) (REF-1) (Redox factor-1) [Cleaved into: DNA-(apurinic or apyrimidinic site) endonuclease, mitochondrial]	1.0918	0.000563987	Up	1.19222	0.000563987	Up
P28474	Adh5 Adh-2 Adh2	Alcohol dehydrogenase class-3 (EC 1.1.1.1) (Alcohol dehydrogenase 2) (Alcohol dehydrogenase 5) (Alcohol dehydrogenase B2) (ADH-B2) (Alcohol dehydrogenase class-III) (Glutathione-dependent formaldehyde dehydrogenase) (FALDH) (FDH) (GSH-FDH) (EC 1.1.1.-) (S-(hydroxymethyl)glutathione dehydrogenase) (EC 1.1.1.284)	1.06565	0.0244354	Up
P28650	Adss1 Adssl1	Adenylosuccinate synthetase isozyme 1 (AMPSase 1) (AdSS 1) (EC 6.3.4.4) (Adenylosuccinate synthetase like 1) (Adenylosuccinate synthetase, basic isozyme) (Adenylosuccinate synthetase, muscle isozyme) (M-type adenylosuccinate synthetase) (IMP--aspartate ligase 1)	1.22038	0.000633461	Up	1.25702	0.000633461	Up
P28656	Nap1l1 Nrp	Nucleosome assembly protein 1-like 1 (Brain protein DN38) (NAP-1-related protein)	0.954894	0.000406164	Down	1.11547	0.000406164	Up
P28658	Atxn10 Sca10	Ataxin-10 (Brain protein E46) (Spinocerebellar ataxia type 10 protein homolog)	1.11992	0.00340397	Up	1.16246	0.00340397	Up
P28740	Kif2a Kif2 Kns2	Kinesin-like protein KIF2A (Kinesin-2)				1.18827	0.0012507	Up
P28798	Grn	Progranulin (PGRN) (Acrogranin) (Epithelin/granulin precursor) (Glycoprotein of 88 Kda) (GP88) (Glycoprotein 88) (PC cell-derived growth factor) (PCDGF) (Proepithelin) (PEPI) [Cleaved into: Paragranulin; Granulin-1; Granulin-2; Granulin-3; Granulin-4; Granulin-5; Granulin-6; Granulin-7]				0.79131	0.0414757	Down
P28867	Prkcd Pkcd	Protein kinase C delta type (EC 2.7.11.13) (Tyrosine-protein kinase PRKCD) (EC 2.7.10.2) (nPKC-delta) [Cleaved into: Protein kinase C delta type regulatory subunit; Protein kinase C delta type catalytic subunit (Sphingosine-dependent protein kinase-1) (SDK1)]				1.12338	0.0345139	Up
P29037	Tbp Tfiid	TATA-box-binding protein (TATA sequence-binding protein) (TATA-binding factor) (TATA-box factor) (Transcription initiation factor TFIID TBP subunit)	1.14637	0.0247032	Up	1.11587	0.0247032	Up
P29341	Pabpc1 Pabp1	Polyadenylate-binding protein 1 (PABP-1) (Poly(A)-binding protein 1)	0.929555	0.00268964	Down
P29351	Ptpn6 Hcp Hcph Ptp1C	Tyrosine-protein phosphatase non-receptor type 6 (EC 3.1.3.48) (70Z-SHP) (Hematopoietic cell protein-tyrosine phosphatase) (PTPTY-42) (Protein-tyrosine phosphatase 1C) (PTP-1C) (SH-PTP1) (SHP-1)	1.16627	5.01104e-05	Up	1.36991	5.01104e-05	Up
P29391	Ftl1 Ftl Ftl-1	Ferritin light chain 1 (Ferritin L subunit 1)	1.27119	0.0078561	Up	1.32967	0.0078561	Up
P29477	Nos2 Inosl	Nitric oxide synthase, inducible (EC 1.14.13.39) (Inducible NO synthase) (Inducible NOS) (iNOS) (Macrophage NOS) (MAC-NOS) (NOS type II) (Peptidyl-cysteine S-nitrosylase NOS2)	0.799144	0.00125971	Down	0.71279	0.00125971	Down
P29594	Casp2 Ich1 Nedd-2 Nedd2	Caspase-2 (CASP-2) (EC 3.4.22.55) (Neural precursor cell expressed developmentally down-regulated protein 2) (NEDD-2) (Protease ICH-1) [Cleaved into: Caspase-2 subunit p18; Caspase-2 subunit p13; Caspase-2 subunit p12]	1.20149	0.00368884	Up	1.44624	0.00368884	Up
P29595	Nedd8 Nedd-8	NEDD8 (Neddylin) (Neural precursor cell expressed developmentally down-regulated protein 8) (NEDD-8) (Ubiquitin-like protein Nedd8)				1.18308	0.0276922	Up
P29758	Oat	Ornithine aminotransferase, mitochondrial (EC 2.6.1.13) (Ornithine--oxo-acid aminotransferase)				0.670347	0.000120688	Down
P30204	Msr1 Scvr	Macrophage scavenger receptor types I and II (Macrophage acetylated LDL receptor I and II) (Scavenger receptor type A) (SR-A) (CD antigen CD204)	0.852613	0.000929852	Down	0.746688	0.000929852	Down
P30285	Cdk4 Crk3	Cyclin-dependent kinase 4 (EC 2.7.11.22) (CRK3) (Cell division protein kinase 4) (PSK-J3)	1.15715	0.00113137	Up	1.28214	0.00113137	Up
P30681	Hmgb2 Hmg2	High mobility group protein B2 (High mobility group protein 2) (HMG-2)				1.14019	0.0304281	Up
P30999	Ctnnd1 Catns Kiaa0384	Catenin delta-1 (Cadherin-associated Src substrate) (CAS) (p120 catenin) (p120(ctn)) (p120(cas))	0.89632	0.000671293	Down	1.10258	0.000671293	Up
P31786	Dbi	Acyl-CoA-binding protein (ACBP) (Diazepam-binding inhibitor) (DBI) (Endozepine) (EP)	1.08467	0.00807998	Up	1.10397	0.00807998	Up
P31938	Map2k1 Mek1 Prkmk1	Dual specificity mitogen-activated protein kinase kinase 1 (MAP kinase kinase 1) (MAPKK 1) (EC 2.7.12.2) (ERK activator kinase 1) (MAPK/ERK kinase 1) (MEK 1)				0.832458	0.000900173	Down
P32020	Scp2 Scp-2	Sterol carrier protein 2 (SCP-2) (Acetyl-CoA C-myristoyltransferase) (EC 2.3.1.155) (Non-specific lipid-transfer protein) (NSL-TP) (Propanoyl-CoA C-acyltransferase) (EC 2.3.1.176) (SCP-2/3-oxoacyl-CoA thiolase) (SCP-2/thiolase) (EC 2.3.1.16) (SCP-chi) (Sterol carrier protein X) (SCP-X) (Straight-chain acyl-CoA oxidase) (SCPX)	1.23213	5.94373e-05	Up	1.18476	5.94373e-05	Up
P32067	Ssb Ss-b	Lupus La protein homolog (La autoantigen homolog) (La ribonucleoprotein)	1.06855	2.97484e-05	Up	1.27698	2.97484e-05	Up
P32883	Kras Kras2	GTPase KRas (EC 3.6.5.2) (K-Ras 2) (Ki-Ras) (c-K-ras) (c-Ki-ras) [Cleaved into: GTPase KRas, N-terminally processed]				0.794907	0.0139066	Down
P33174	Kif4 Kif4a Kns4	Chromosome-associated kinesin KIF4 (Chromokinesin)				1.33807	0.0132275	Up
P33609	Pola1 Pola	DNA polymerase alpha catalytic subunit (EC 2.7.7.7) (DNA polymerase alpha catalytic subunit p180)				1.29002	0.000303803	Up
P33610	Prim2	DNA primase large subunit (DNA primase 58 kDa subunit) (p58)				1.33435	0.0127142	Up
P33611	Pola2	DNA polymerase alpha subunit B (DNA polymerase alpha 70 kDa subunit)	1.19882	0.000440561	Up	1.46998	0.000440561	Up
P34022	Ranbp1 Htf9-a Htf9a	Ran-specific GTPase-activating protein (HpaII tiny fragments locus 9a protein) (Ran-binding protein 1) (RANBP1)	1.0337	0.00696058	Up	1.05482	0.00696058	Up
P34884	Mif	Macrophage migration inhibitory factor (MIF) (EC 5.3.2.1) (Delayed early response protein 6) (DER6) (Glycosylation-inhibiting factor) (GIF) (L-dopachrome isomerase) (L-dopachrome tautomerase) (EC 5.3.3.12) (Phenylpyruvate tautomerase)	1.08193	0.00447973	Up	1.04726	0.00447973	Up
P35123	Usp4 Unp	Ubiquitin carboxyl-terminal hydrolase 4 (EC 3.4.19.12) (Deubiquitinating enzyme 4) (Ubiquitin thioesterase 4) (Ubiquitin-specific-processing protease 4) (Ubiquitous nuclear protein)				1.10552	0.00253112	Up
P35283	Rab12	Ras-related protein Rab-12 (Rab-13)	0.837366	0.0235012	Down	0.777146	0.0235012	Down
P35285	Rab22a Rab22	Ras-related protein Rab-22A (Rab-22) (Rab-14)	0.925742	0.00233676	Down	0.816649	0.00233676	Down
P35486	Pdha1 Pdha-1	Pyruvate dehydrogenase E1 component subunit alpha, somatic form, mitochondrial (EC 1.2.4.1) (PDHE1-A type I)	0.916241	0.000184372	Down	0.647091	0.000184372	Down
P35564	Canx	Calnexin				0.792048	0.00863247	Down
P35585	Ap1m1 Cltnm	AP-1 complex subunit mu-1 (AP-mu chain family member mu1A) (Adaptor protein complex AP-1 subunit mu-1) (Adaptor-related protein complex 1 subunit mu-1) (Clathrin assembly protein complex 1 mu-1 medium chain 1) (Clathrin coat assembly protein AP47) (Clathrin coat-associated protein AP47) (Golgi adaptor HA1/AP1 adaptin mu-1 subunit) (Mu-adaptin 1) (Mu1A-adaptin)				0.79181	0.0207828	Down
P35601	Rfc1 Ibf-1 Recc1	Replication factor C subunit 1 (A1-P145) (Activator 1 140 kDa subunit) (A1 140 kDa subunit) (Activator 1 large subunit) (Activator 1 subunit 1) (Differentiation-specific element-binding protein) (ISRE-binding protein) (Replication factor C 140 kDa subunit) (RF-C 140 kDa subunit) (RFC140) (Replication factor C large subunit)	1.16963	5.23966e-05	Up	1.26019	5.23966e-05	Up
P35700	Prdx1 Msp23 Paga Tdpx2	Peroxiredoxin-1 (EC 1.11.1.24) (Macrophage 23 kDa stress protein) (Osteoblast-specific factor 3) (OSF-3) (Thioredoxin peroxidase 2) (Thioredoxin-dependent peroxide reductase 2) (Thioredoxin-dependent peroxiredoxin 1)				0.797532	5.92432e-05	Down
P35821	Ptpn1	Tyrosine-protein phosphatase non-receptor type 1 (EC 3.1.3.48) (Protein-tyrosine phosphatase 1B) (PTP-1B) (Protein-tyrosine phosphatase HA2) (PTP-HA2)				1.18893	0.0479121	Up
P35991	Btk Bpk	Tyrosine-protein kinase BTK (EC 2.7.10.2) (Agammaglobulinemia tyrosine kinase) (ATK) (B-cell progenitor kinase) (BPK) (Bruton tyrosine kinase) (Kinase EMB)	1.16932	0.00608791	Up	1.31849	0.00608791	Up
P37040	Por	NADPH--cytochrome P450 reductase (CPR) (P450R) (EC 1.6.2.4)				0.821957	0.0218507	Down
P37913	Lig1 Lig-1	DNA ligase 1 (EC 6.5.1.1) (DNA ligase I) (Polydeoxyribonucleotide synthase [ATP] 1)	1.16843	0.000357111	Up	1.28661	0.000357111	Up
P38060	Hmgcl	Hydroxymethylglutaryl-CoA lyase, mitochondrial (HL) (HMG-CoA lyase) (EC 4.1.3.4) (3-hydroxy-3-methylglutarate-CoA lyase)	1.03707	0.000294823	Up	0.88196	0.000294823	Down
P38532	Hsf1	Heat shock factor protein 1 (HSF 1) (Heat shock transcription factor 1) (HSTF 1)	0.811611	0.00779077	Down
P38647	Hspa9 Grp75 Hsp74 Hspa9a	Stress-70 protein, mitochondrial (75 kDa glucose-regulated protein) (GRP-75) (Heat shock 70 kDa protein 9) (Mortalin) (Peptide-binding protein 74) (PBP74) (p66 MOT)	0.886282	1.29663e-07	Down	0.701324	1.29663e-07	Down
P39054	Dnm2 Dyn2	Dynamin-2 (EC 3.6.5.5) (Dynamin UDNM)	1.13666	0.00548082	Up
P39428	Traf1	TNF receptor-associated factor 1	0.583767	2.24615e-06	Down	0.913592	2.24615e-06	Down
P39749	Fen1 Fen-1	Flap endonuclease 1 (FEN-1) (EC 3.1.-.-) (Flap structure-specific endonuclease 1)	1.14841	2.58764e-05	Up	1.34628	2.58764e-05	Up
P40124	Cap1 Cap	Adenylyl cyclase-associated protein 1 (CAP 1)				0.823307	0.00128379	Down
P41241	Csk	Tyrosine-protein kinase CSK (EC 2.7.10.2) (C-Src kinase) (Protein-tyrosine kinase MPK-2) (p50CSK)	1.11951	0.00292924	Up	1.18612	0.00292924	Up
P42125	Eci1 Dci	Enoyl-CoA delta isomerase 1, mitochondrial (EC 5.3.3.8) (3,2-trans-enoyl-CoA isomerase) (Delta(3),Delta(2)-enoyl-CoA isomerase) (D3,D2-enoyl-CoA isomerase) (Dodecenoyl-CoA isomerase)				0.745765	0.00195263	Down
P42208	Septin2 Nedd5 Sept2	Septin-2 (Neural precursor cell expressed developmentally down-regulated protein 5) (NEDD-5)				0.884273	0.00476194	Down
P42225	Stat1	Signal transducer and activator of transcription 1	0.797879	2.97484e-05	Down	0.665297	2.97484e-05	Down
P42227	Stat3 Aprf	Signal transducer and activator of transcription 3 (Acute-phase response factor)	0.791702	0.00184014	Down	0.899614	0.00184014	Down
P42230	Stat5a Mgf Mpf	Signal transducer and activator of transcription 5A (Mammary gland factor)				1.18873	0.00229571	Up
P42669	Pura	Transcriptional activator protein Pur-alpha (Purine-rich single-stranded DNA-binding protein alpha)	1.08342	0.000907015	Up	1.1102	0.000907015	Up
P42932	Cct8 Cctq	T-complex protein 1 subunit theta (TCP-1-theta) (CCT-theta)	0.90374	0.00015173	Down	0.873806	0.00015173	Down
P43247	Msh2	DNA mismatch repair protein Msh2 (MutS protein homolog 2)	1.20342	5.60897e-05	Up	1.36713	5.60897e-05	Up
P43274	H1-4 H1f4 Hist1h1e	Histone H1.4 (H1 VAR.2) (H1e)	0.811164	0.00164178	Down	0.595064	0.00164178	Down
P43275	H1-1 H1a H1f1 Hist1h1a	Histone H1.1 (H1 VAR.3) (Histone H1a) (H1a)				0.84298	0.00971851	Down
P43276	H1-5 H1f5 Hist1h1b	Histone H1.5 (H1 VAR.5) (H1b)	0.880193	5.18444e-05	Down	0.706235	5.18444e-05	Down
P43346	Dck	Deoxycytidine kinase (dCK) (EC 2.7.1.74) (Deoxyadenosine kinase) (EC 2.7.1.76) (Deoxyguanosine kinase) (EC 2.7.1.113)	0.803072	1.22882e-05	Down	0.660202	1.22882e-05	Down
P45377	Akr1b8 Fgfrp	Aldose reductase-related protein 2 (AR) (EC 1.1.1.21) (Aldehyde reductase) (Fibroblast growth factor-regulated protein) (Protein FR-1)				0.86892	0.000684748	Down
P46061	Rangap1 Fug1	Ran GTPase-activating protein 1 (RanGAP1)	1.10743	0.000310564	Up	1.27476	0.000310564	Up
P46460	Nsf Skd2	Vesicle-fusing ATPase (EC 3.6.4.6) (N-ethylmaleimide-sensitive fusion protein) (NEM-sensitive fusion protein) (Suppressor of K(+) transport growth defect 2) (Protein SKD2) (Vesicular-fusion protein NSF)				0.847817	0.00108119	Down
P46471	Psmc2 Mss1	26S proteasome regulatory subunit 7 (26S proteasome AAA-ATPase subunit RPT1) (Proteasome 26S subunit ATPase 2) (Protein MSS1)	0.912376	0.000489689	Down	0.818242	0.000489689	Down
P46718	Pdcd2 Rp8	Programmed cell death protein 2 (Zinc finger protein Rp-8)				1.1512	0.00847287	Up
P46737	Brcc3 Brcc36 C6.1a	Lys-63-specific deubiquitinase BRCC36 (EC 3.4.19.-) (BRCA1-A complex subunit BRCC36) (BRCA1/BRCA2-containing complex subunit 3) (BRCA1/BRCA2-containing complex subunit 36) (BRISC complex subunit BRCC36)				1.21917	0.04975	Up
P47199	Cryz	Quinone oxidoreductase (EC 1.6.5.5) (NADPH:quinone reductase) (Zeta-crystallin)	1.11471	0.009279	Up
P47713	Pla2g4a Cpla2 Pla2g4	Cytosolic phospholipase A2 (cPLA2) (Phospholipase A2 group IVA) [Includes: Phospholipase A2 (EC 3.1.1.4) (Phosphatidylcholine 2-acylhydrolase); Lysophospholipase (EC 3.1.1.5)]				1.26936	0.000738062	Up
P47738	Aldh2 Ahd-1 Ahd1	Aldehyde dehydrogenase, mitochondrial (EC 1.2.1.3) (AHD-M1) (ALDH class 2) (ALDH-E2) (ALDHI)				0.753201	6.41311e-05	Down
P47753	Capza1 Cappa1	F-actin-capping protein subunit alpha-1 (CapZ alpha-1)				0.924263	0.00251304	Down
P47754	Capza2 Cappa2	F-actin-capping protein subunit alpha-2 (CapZ alpha-2)				0.86098	0.0155171	Down
P47811	Mapk14 Crk1 Csbp1 Csbp2	Mitogen-activated protein kinase 14 (MAP kinase 14) (MAPK 14) (EC 2.7.11.24) (CRK1) (Mitogen-activated protein kinase p38 alpha) (MAP kinase p38 alpha)	1.33675	4.76714e-06	Up	1.60202	4.76714e-06	Up
P47857	Pfkm Pfk-m Pfka	ATP-dependent 6-phosphofructokinase, muscle type (ATP-PFK) (PFK-M) (EC 2.7.1.11) (6-phosphofructokinase type A) (Phosphofructo-1-kinase isozyme A) (PFK-A) (Phosphohexokinase)	1.13814	0.0267408	Up	1.13936	0.0267408	Up
P47930	Fosl2 Fra-2 Fra2	Fos-related antigen 2 (FRA-2)	0.76935	0.000123141	Down	0.594186	0.000123141	Down
P47962	Rpl5	60S ribosomal protein L5	0.907602	0.00487588	Down	0.842373	0.00487588	Down
P48036	Anxa5 Anx5	Annexin A5 (Anchorin CII) (Annexin V) (Annexin-5) (Calphobindin I) (CBP-I) (Endonexin II) (Lipocortin V) (Placental anticoagulant protein 4) (PP4) (Placental anticoagulant protein I) (PAP-I) (Thromboplastin inhibitor) (Vascular anticoagulant-alpha) (VAC-alpha)				0.875974	0.00938206	Down
P48453	Ppp3cb Calnb	Serine/threonine-protein phosphatase 2B catalytic subunit beta isoform (EC 3.1.3.16) (CAM-PRP catalytic subunit) (Calmodulin-dependent calcineurin A subunit beta isoform) (CNA beta)	0.931016	0.00176333	Down	1.05013	0.00176333	Up
P48678	Lmna Lmn1	Prelamin-A/C [Cleaved into: Lamin-A/C]	0.845344	0.000141333	Down
P48722	Hspa4l Apg1 Hsp4l Osp94	Heat shock 70 kDa protein 4L (Heat shock 70-related protein APG-1) (Osmotic stress protein 94)				0.891144	0.0190943	Down
P48754	Brca1	Breast cancer type 1 susceptibility protein homolog (EC 2.3.2.27) (RING-type E3 ubiquitin transferase BRCA1)	1.42656	1.73568e-05	Up	1.54869	1.73568e-05	Up
P48755	Fosl1 Fra1	Fos-related antigen 1 (FRA-1)	0.783756	1.27814e-05	Down	0.562876	1.27814e-05	Down
P48758	Cbr1 Cbr	Carbonyl reductase [NADPH] 1 (EC 1.1.1.184) (15-hydroxyprostaglandin dehydrogenase [NADP(+)]) (EC 1.1.1.196) (EC 1.1.1.197) (20-beta-hydroxysteroid dehydrogenase) (NADPH-dependent carbonyl reductase 1) (Prostaglandin 9-ketoreductase) (PG-9-KR) (Prostaglandin-E(2) 9-reductase) (EC 1.1.1.189)	1.14073	0.00232597	Up	1.20278	0.00232597	Up
P48999	Alox5	Polyunsaturated fatty acid 5-lipoxygenase (EC 1.13.11.-) (Arachidonate 5-lipoxygenase) (5-LO) (5-lipoxygenase) (EC 1.13.11.34)	1.26681	0.00183535	Up	1.43411	0.00183535	Up
P49025	Cit Crik	Citron Rho-interacting kinase (CRIK) (EC 2.7.11.1) (Rho-interacting, serine/threonine-protein kinase 21)	0.635574	0.00817828	Down	0.800585	0.00817828	Down
P49135	Ercc3 Xpb Xpbc	General transcription and DNA repair factor IIH helicase subunit XPB (TFIIH subunit XPB) (EC 3.6.4.12) (Basic transcription factor 2 89 kDa subunit) (BTF2 p89) (DNA excision repair protein ERCC-3) (DNA repair protein complementing XP-B cells) (TFIIH 89 kDa subunit) (Xeroderma pigmentosum group B-complementing protein)				1.24645	0.0109969	Up
P49312	Hnrnpa1 Fli-2 Hnrpa1 Tis	Heterogeneous nuclear ribonucleoprotein A1 (hnRNP A1) (HDP-1) (Helix-destabilizing protein) (Single-strand-binding protein) (Topoisomerase-inhibitor suppressed) (hnRNP core protein A1) [Cleaved into: Heterogeneous nuclear ribonucleoprotein A1, N-terminally processed]				1.03343	0.0385978	Up
P49442	Inpp1	Inositol polyphosphate 1-phosphatase (IPP) (IPPase) (EC 3.1.3.57)				0.737721	0.00134482	Down
P49615	Cdk5 Cdkn5 Crk6	Cyclin-dependent-like kinase 5 (EC 2.7.11.1) (CR6 protein kinase) (CRK6) (Cell division protein kinase 5) (Serine/threonine-protein kinase PSSALRE) (Tau protein kinase II catalytic subunit) (TPKII catalytic subunit)	1.17771	0.00142011	Up	1.36523	0.00142011	Up
P49710	Hcls1 Hs1	Hematopoietic lineage cell-specific protein (Hematopoietic cell-specific LYN substrate 1) (LckBP1)	0.875905	1.27814e-05	Down	0.76386	1.27814e-05	Down
P49717	Mcm4 Cdc21 Mcmd4	DNA replication licensing factor MCM4 (EC 3.6.4.12) (CDC21 homolog) (P1-CDC21)	1.15023	5.97134e-05	Up	1.3187	5.97134e-05	Up
P49718	Mcm5 Cdc46 Mcmd5	DNA replication licensing factor MCM5 (EC 3.6.4.12) (CDC46 homolog) (P1-CDC46)	1.20927	3.04631e-05	Up	1.37747	3.04631e-05	Up
P49722	Psma2 Lmpc3	Proteasome subunit alpha type-2 (Macropain subunit C3) (Multicatalytic endopeptidase complex subunit C3) (Proteasome component C3)	0.954894	0.00178996	Down	0.892507	0.00178996	Down
P50096	Impdh1	Inosine-5'-monophosphate dehydrogenase 1 (IMP dehydrogenase 1) (IMPD 1) (IMPDH 1) (EC 1.1.1.205) (IMPDH-I)	0.946821	0.0217813	Down	0.934798	0.0217813	Down
P50396	Gdi1 Rabgdia	Rab GDP dissociation inhibitor alpha (Rab GDI alpha) (Guanosine diphosphate dissociation inhibitor 1) (GDI-1)	0.87399	5.27387e-05	Down	0.703471	5.27387e-05	Down
P50431	Shmt1 Shmt	Serine hydroxymethyltransferase, cytosolic (SHMT) (EC 2.1.2.1) (Glycine hydroxymethyltransferase) (Serine methylase)				1.09327	0.0301476	Up
P50516	Atp6v1a Atp6a1 Atp6a2 Atp6v1a1	V-type proton ATPase catalytic subunit A (V-ATPase subunit A) (EC 7.1.2.2) (V-ATPase 69 kDa subunit) (Vacuolar proton pump subunit alpha)				0.833463	0.000279177	Down
P50518	Atp6v1e1 Atp6e Atp6e2	V-type proton ATPase subunit E 1 (V-ATPase subunit E 1) (V-ATPase 31 kDa subunit) (p31) (Vacuolar proton pump subunit E 1)				0.842197	0.0285502	Down
P50544	Acadvl Vlcad	Very long-chain specific acyl-CoA dehydrogenase, mitochondrial (EC 1.3.8.9) (MVLCAD) (VLCAD)				1.13545	0.00412948	Up
P50580	Pa2g4 Ebp1 Plfap	Proliferation-associated protein 2G4 (IRES-specific cellular trans-acting factor 45 kDa) (ITAF45) (Mpp1) (Proliferation-associated protein 1) (Protein p38-2G4)				1.07733	0.0059358	Up
P51125	Cast	Calpastatin (Calpain inhibitor)				0.818363	0.000416892	Down
P51174	Acadl	Long-chain specific acyl-CoA dehydrogenase, mitochondrial (LCAD) (EC 1.3.8.8)				0.806094	0.00194769	Down
P51859	Hdgf Tdrm1	Hepatoma-derived growth factor (HDGF)				1.07446	0.0157622	Up
P51863	Atp6v0d1 Atp6d	V-type proton ATPase subunit d 1 (V-ATPase subunit d 1) (P39) (Physophilin) (V-ATPase 40 kDa accessory protein) (V-ATPase AC39 subunit) (Vacuolar proton pump subunit d 1)				0.769485	0.0107172	Down
P51881	Slc25a5 Aac2 Ant2	ADP/ATP translocase 2 (ADP,ATP carrier protein 2) (Adenine nucleotide translocator 2) (ANT 2) (Solute carrier family 25 member 5) [Cleaved into: ADP/ATP translocase 2, N-terminally processed]				0.638981	0.000172397	Down
P51943	Ccna2 Ccna Cyca Cyca2	Cyclin-A2 (Cyclin-A)	1.42271	0.000125677	Up	1.58136	0.000125677	Up
P51949	Mnat1 Mat1	CDK-activating kinase assembly factor MAT1 (CDK7/cyclin-H assembly factor) (Menage a trois) (RING finger protein MAT1) (p35) (p36)				1.20881	0.000210516	Up
P52293	Kpna2 Rch1	Importin subunit alpha-1 (Importin alpha P1) (Karyopherin subunit alpha-2) (Pendulin) (Pore targeting complex 58 kDa subunit) (PTAC58) (RAG cohort protein 1) (SRP1-alpha)	1.17903	0.000810768	Up	1.34617	0.000810768	Up
P52431	Pold1	DNA polymerase delta catalytic subunit (EC 2.7.7.7) (3'-5' exodeoxyribonuclease) (EC 3.1.11.-)	1.29557	0.00226303	Up	1.45561	0.00226303	Up
P52479	Usp10 Kiaa0190 Ode-1 Uchrp	Ubiquitin carboxyl-terminal hydrolase 10 (EC 3.4.19.12) (Deubiquitinating enzyme 10) (Ubiquitin thioesterase 10) (Ubiquitin-specific-processing protease 10)	1.14908	0.000321359	Up	1.35068	0.000321359	Up
P52480	Pkm Pk3 Pkm2 Pykm	Pyruvate kinase PKM (EC 2.7.1.40) (Pyruvate kinase muscle isozyme)	1.07797	0.0116833	Up
P52624	Upp1 Up Upp	Uridine phosphorylase 1 (UPase 1) (UrdPase 1) (EC 2.4.2.3)	0.918886	0.000179275	Down	0.636624	0.000179275	Down
P52633	Stat6	Signal transducer and transcription activator 6	1.39677	0.0119146	Up	1.59519	0.0119146	Up
P53368	Nudt1 Mth1	7,8-dihydro-8-oxoguanine triphosphatase (EC 3.6.1.55) (2-hydroxy-dATP diphosphatase) (EC 3.6.1.56) (8-oxo-dGTPase) (Nucleoside diphosphate-linked moiety X motif 1) (Nudix motif 1)				0.773999	0.0253986	Down
P53395	Dbt	Lipoamide acyltransferase component of branched-chain alpha-keto acid dehydrogenase complex, mitochondrial (EC 2.3.1.168) (Branched-chain alpha-keto acid dehydrogenase complex component E2) (BCKAD-E2) (BCKADE2) (Dihydrolipoamide acetyltransferase component of branched-chain alpha-keto acid dehydrogenase complex) (Dihydrolipoamide branched chain transacylase) (Dihydrolipoyllysine-residue (2-methyl…	0.923449	0.00040231	Down	0.736861	0.00040231	Down
P53564	Cux1 Cutl1 Cux Kiaa4047	Homeobox protein cut-like 1 (CCAAT displacement protein) (CDP) (Homeobox protein cux-1) [Cleaved into: CDP/Cux p110]	1.23435	0.00130553	Up	1.17132	0.00130553	Up
P53569	Cebpz Cbf2 Cebpa-rs1	CCAAT/enhancer-binding protein zeta (CCAAT-box-binding transcription factor) (CBF) (CCAAT-binding factor)				1.21151	0.000357578	Up
P53810	Pitpna Pitpn	Phosphatidylinositol transfer protein alpha isoform (PI-TP-alpha) (PtdIns transfer protein alpha) (PtdInsTP alpha)				0.856926	0.0193751	Down
P53995	Anapc1 Mcpr Tsg24	Anaphase-promoting complex subunit 1 (APC1) (Cyclosome subunit 1) (Mitotic checkpoint regulator) (Testis-specific gene 24 protein)	1.25379	0.0188313	Up	1.335	0.0188313	Up
P53996	Cnbp Cnbp1 Znf9	Cellular nucleic acid-binding protein (CNBP) (Zinc finger protein 9)				1.17964	0.00237927	Up
P54103	Dnajc2 Mida1 Zrf1	DnaJ homolog subfamily C member 2 (Mouse Id associate 1) (MIDA1) (Zuotin-related factor 1)				1.09715	0.0150844	Up
P54227	Stmn1 Lag Lap18 Pr22	Stathmin (Leukemia-associated gene protein) (Leukemia-associated phosphoprotein p18) (Metablastin) (Oncoprotein 18) (Op18) (Phosphoprotein p19) (pp19) (Prosolin) (Protein Pr22) (pp17)	1.24093	0.0195205	Up	1.27102	0.0195205	Up
P54276	Msh6 Gtmbp	DNA mismatch repair protein Msh6 (G/T mismatch-binding protein) (GTBP) (GTMBP) (MutS protein homolog 6) (MutS-alpha 160 kDa subunit) (p160)	1.17658	0.000123542	Up	1.3602	0.000123542	Up
P54310	Lipe	Hormone-sensitive lipase (HSL) (EC 3.1.1.79) (Monoacylglycerol lipase LIPE) (EC 3.1.1.23) (Retinyl ester hydrolase) (REH)	1.2495	0.00356133	Up	1.43657	0.00356133	Up
P54729	Nub1 Nyren18	NEDD8 ultimate buster 1 (Negative regulator of ubiquitin-like proteins 1) (Protein BS4)				1.24927	0.00672685	Up
P54731	Faf1	FAS-associated factor 1				1.1434	0.0184181	Up
P54763	Ephb2 Epth3 Nuk Sek3	Ephrin type-B receptor 2 (EC 2.7.10.1) (Neural kinase) (Nuk receptor tyrosine kinase) (Tyrosine-protein kinase receptor EPH-3) (Tyrosine-protein kinase receptor SEK-3) [Cleaved into: EphB2/CTF1; EphB2/CTF2]				0.929331	0.0420868	Down
P54775	Psmc4 Tbp7	26S proteasome regulatory subunit 6B (26S proteasome AAA-ATPase subunit RPT3) (CIP21) (MB67-interacting protein) (MIP224) (Proteasome 26S subunit ATPase 4) (Tat-binding protein 7) (TBP-7)	0.961029	0.0132949	Down	0.934223	0.0132949	Down
P54823	Ddx6 Hlr2 Rck	Probable ATP-dependent RNA helicase DDX6 (EC 3.6.4.13) (ATP-dependent RNA helicase p54) (DEAD box protein 6) (Oncogene RCK homolog)	0.879371	0.0303807	Down
P54987	Acod1 Irg1	Cis-aconitate decarboxylase (CAD) (EC 4.1.1.6) (Aconitate decarboxylase) (Aconitate decarboxylase 1) (Cis-aconitic acid decarboxylase) (Immune-responsive gene 1 protein)	0.719162	5.98541e-05	Down	0.657392	5.98541e-05	Down
P55264	Adk	Adenosine kinase (AK) (EC 2.7.1.20) (Adenosine 5'-phosphotransferase)	1.1588	0.00429043	Up	1.16741	0.00429043	Up
P55937	Golga3 Mea2	Golgin subfamily A member 3 (Golgin-160) (Male-enhanced antigen 2) (MEA-2)	0.899285	0.0282754	Down	0.867701	0.0282754	Down
P56183	Rrp1 Nnp1	Ribosomal RNA processing protein 1 homolog A (Novel nuclear protein 1) (NNP-1) (Nucleolar protein Nop52) (RRP1-like protein)	0.845832	0.00829846	Down
P56399	Usp5 Isot	Ubiquitin carboxyl-terminal hydrolase 5 (EC 3.4.19.12) (Deubiquitinating enzyme 5) (Isopeptidase T) (Ubiquitin thioesterase 5) (Ubiquitin-specific-processing protease 5)	1.08299	0.00174627	Up	1.22202	0.00174627	Up
P56480	Atp5f1b Atp5b	ATP synthase subunit beta, mitochondrial (EC 7.1.2.2) (ATP synthase F1 subunit beta)				0.739181	7.59556e-05	Down
P56565	S100a1	Protein S100-A1 (S-100 protein alpha chain) (S-100 protein subunit alpha) (S100 calcium-binding protein A1)	1.16817	0.0333002	Up
P56873	Znrd2 C184l Sssca1	Protein ZNRD2 (Autoantigen p27 homolog) (Protein C184L) (Sjoegren syndrome/scleroderma autoantigen 1 homolog) (Zinc ribbon domain-containing protein 2)				1.08221	0.0122603	Up
P56959	Fus	RNA-binding protein FUS (Protein pigpen)	0.963442	0.000417234	Down	0.88848	0.000417234	Down
P56960	Exosc10 Pmscl2	Exosome component 10 (EC 3.1.13.-) (Autoantigen PM/Scl 2 homolog) (Polymyositis/scleroderma autoantigen 2 homolog)				1.08582	0.0109124	Up
P57080	Usp25	Ubiquitin carboxyl-terminal hydrolase 25 (EC 3.4.19.12) (Deubiquitinating enzyme 25) (Ubiquitin thioesterase 25) (Ubiquitin-specific-processing protease 25) (mUSP25)	0.85365	0.0014888	Down	0.906651	0.0014888	Down
P57716	Ncstn	Nicastrin				0.614749	0.00027825	Down
P57725	Samsn1	SAM domain-containing protein SAMSN-1 (SAM domain, SH3 domain and nuclear localization signals protein 1) (SH3 protein expressed in lymphocytes 2) (SH3-lymphocyte protein 2) (SLy2)	0.71697	0.000163633	Down	0.743166	0.000163633	Down
P57746	Atp6v1d Atp6m Vatd	V-type proton ATPase subunit D (V-ATPase subunit D) (V-ATPase 28 kDa accessory protein) (Vacuolar proton pump subunit D)				0.832058	0.00423936	Down
P57759	Erp29	Endoplasmic reticulum resident protein 29 (ERp29)				0.893204	0.0105132	Down
P57780	Actn4	Alpha-actinin-4 (Non-muscle alpha-actinin 4)	1.10196	5.23966e-05	Up	0.805973	5.23966e-05	Down
P57784	Snrpa1	U2 small nuclear ribonucleoprotein A' (U2 snRNP A')				0.809346	0.0200806	Down
P58043	Sesn2	Sestrin-2 (EC 1.11.1.-)	0.804362	0.000257321	Down	1.19329	0.000257321	Up
P58044	Idi1	Isopentenyl-diphosphate Delta-isomerase 1 (EC 5.3.3.2) (Isopentenyl pyrophosphate isomerase 1) (IPP isomerase 1) (IPPI1)				1.16619	0.0159138	Up
P58058	Nadk	NAD kinase (EC 2.7.1.23) (Poly(P)/ATP NAD kinase)	0.748467	0.00292924	Down	0.771579	0.00292924	Down
P58252	Eef2	Elongation factor 2 (EF-2)	0.834382	3.04631e-05	Down	0.790058	3.04631e-05	Down
P58389	Ptpa Ppp2r4	Serine/threonine-protein phosphatase 2A activator (EC 5.2.1.8) (PP2A, subunit B', PR53 isoform) (Phosphotyrosyl phosphatase activator) (PTPA) (Serine/threonine-protein phosphatase 2A regulatory subunit 4) (Serine/threonine-protein phosphatase 2A regulatory subunit B')				1.24923	0.00285331	Up
P58771	Tpm1 Tpm-1 Tpma	Tropomyosin alpha-1 chain (Alpha-tropomyosin) (Tropomyosin-1)				0.901379	0.00176697	Down
P58801	Ripk2	Receptor-interacting serine/threonine-protein kinase 2 (EC 2.7.11.1) (Tyrosine-protein kinase RIPK2) (EC 2.7.10.2)	0.832984	0.0120824	Down	0.757541	0.0120824	Down
P59048	Pdrg1 Pdrg	p53 and DNA damage-regulated protein 1				1.29783	0.00226303	Up
P59325	Eif5	Eukaryotic translation initiation factor 5 (eIF-5)				0.888181	0.00608791	Down
P59328	Wdhd1 And1	WD repeat and HMG-box DNA-binding protein 1 (Acidic nucleoplasmic DNA-binding protein 1) (And-1)	1.1342	0.00428455	Up	1.2837	0.00428455	Up
P59438	Hps5 Ru2	Hermansky-Pudlak syndrome 5 protein homolog (Ruby-eye protein 2) (Ru2)	1.18917	0.00374123	Up	1.27999	0.00374123	Up
P59708	Sf3b6 Sf3b14	Splicing factor 3B subunit 6 (Pre-mRNA branch site protein p14) (SF3b 14 kDa subunit)				0.906214	0.00632005	Down
P59729	Rin3	Ras and Rab interactor 3 (Ras interaction/interference protein 3)				1.33014	0.0365541	Up
P59808	Sash1	SAM and SH3 domain-containing protein 1	0.728892	5.49695e-05	Down	0.731883	5.49695e-05	Down
P59999	Arpc4 Arc20	Actin-related protein 2/3 complex subunit 4 (Arp2/3 complex 20 kDa subunit) (p20-ARC)				0.682822	0.00284585	Down
P60122	Ruvbl1 Tip49 Tip49a	RuvB-like 1 (EC 3.6.4.12) (49 kDa TATA box-binding protein-interacting protein) (49 kDa TBP-interacting protein) (DNA helicase p50) (Pontin 52) (TIP49a)				1.04199	0.0179663	Up
P60469	Ppfia3	Liprin-alpha-3 (Protein tyrosine phosphatase receptor type f polypeptide-interacting protein alpha-3) (PTPRF-interacting protein alpha-3)	1.10065	0.00262148	Up	1.15159	0.00262148	Up
P60762	Morf4l1 Mrg15 Tex189	Mortality factor 4-like protein 1 (MORF-related gene 15 protein) (Testis-expressed gene 189 protein) (Transcription factor-like protein MRG15)	1.23397	0.00977583	Up	1.3487	0.00977583	Up
P60766	Cdc42	Cell division control protein 42 homolog (EC 3.6.5.2) (G25K GTP-binding protein)	1.10275	0.0132949	Up	1.07773	0.0132949	Up
P60843	Eif4a1 Ddx2a Eif4a	Eukaryotic initiation factor 4A-I (eIF-4A-I) (eIF4A-I) (EC 3.6.4.13) (ATP-dependent RNA helicase eIF4A-1)	0.905263	0.000934485	Down
P60904	Dnajc5 Cspalpha	DnaJ homolog subfamily C member 5 (Cysteine string protein) (CSP) (Cysteine-string protein isoform alpha)				0.72481	0.00145584	Down
P61025	Cks1b Cks1 Sid1334	Cyclin-dependent kinases regulatory subunit 1 (CKS-1) (Sid 1334)	1.47071	0.000200533	Up	1.7765	0.000200533	Up
P61027	Rab10	Ras-related protein Rab-10 (EC 3.6.5.2)				1.05747	0.00433318	Up
P61082	Ube2m Ubc-rs2 Ubc12	NEDD8-conjugating enzyme Ubc12 (EC 2.3.2.34) (NEDD8 carrier protein) (Ubiquitin-conjugating enzyme E2 M)	0.926566	0.00204128	Down	0.930821	0.00204128	Down
P61161	Actr2 Arp2	Actin-related protein 2 (Actin-like protein 2)				0.837791	0.0120368	Down
P61211	Arl1	ADP-ribosylation factor-like protein 1				0.775716	0.00113756	Down
P61222	Abce1 Rli	ATP-binding cassette sub-family E member 1 (RNase L inhibitor) (Ribonuclease 4 inhibitor) (RNS4I)	1.0504	4.06126e-05	Up	1.303	4.06126e-05	Up
P61226	Rap2b	Ras-related protein Rap-2b (EC 3.6.5.2)				0.71464	0.00114397	Down
P61290	Psme3	Proteasome activator complex subunit 3 (11S regulator complex subunit gamma) (REG-gamma) (Activator of multicatalytic protease subunit 3) (Ki nuclear autoantigen) (Proteasome activator 28 subunit gamma) (PA28g) (PA28gamma)	0.895466	0.00660801	Down	0.893234	0.00660801	Down
P61600	Naa20 Nat5	N-alpha-acetyltransferase 20 (EC 2.3.1.254) (Methionine N-acetyltransferase) (N-acetyltransferase 5) (N-terminal acetyltransferase B complex catalytic subunit NAA20) (N-terminal acetyltransferase B complex catalytic subunit NAT5) (NatB complex subunit NAT5) (NatB catalytic subunit)	0.861552	0.00125879	Down	0.71529	0.00125879	Down
P61961	Ufm1	Ubiquitin-fold modifier 1				0.861885	0.000642036	Down
P61963	Dcaf7 Han11 Wdr68	DDB1- and CUL4-associated factor 7 (WD repeat-containing protein 68) (WD repeat-containing protein An11 homolog)				1.19261	0.00953116	Up
P62075	Timm13 Tim13a Timm13a	Mitochondrial import inner membrane translocase subunit Tim13	0.922751	0.00118191	Down	0.811953	0.00118191	Down
P62082	Rps7	40S ribosomal protein S7	0.947622	0.000916623	Down	1.04423	0.000916623	Up
P62192	Psmc1	26S proteasome regulatory subunit 4 (P26s4) (26S proteasome AAA-ATPase subunit RPT2) (Proteasome 26S subunit ATPase 1)	0.94162	0.00298632	Down	0.863667	0.00298632	Down
P62196	Psmc5 Sug1	26S proteasome regulatory subunit 8 (26S proteasome AAA-ATPase subunit RPT6) (Proteasome 26S subunit ATPase 5) (Proteasome subunit p45) (p45/SUG) (mSUG1)				0.90606	0.00570117	Down
P62259	Ywhae	14-3-3 protein epsilon (14-3-3E)				0.953078	0.0203974	Down
P62270	Rps18	40S ribosomal protein S18 (Ke-3) (Ke3)				1.15419	0.0231199	Up
P62301	Rps13	40S ribosomal protein S13				1.14125	0.00889915	Up
P62317	Snrpd2	Small nuclear ribonucleoprotein Sm D2 (Sm-D2) (snRNP core protein D2)	0.919264	0.00292924	Down	0.812411	0.00292924	Down
P62334	Psmc6 Sug2	26S proteasome regulatory subunit 10B (26S proteasome AAA-ATPase subunit RPT4) (Proteasome 26S subunit ATPase 6) (Proteasome subunit p42)	0.956296	0.000666824	Down	0.892803	0.000666824	Down
P62340	Tbpl1 Tlf Tlp Tlp21 Trf2 Trp	TATA box-binding protein-like 1 (TBP-like 1) (21 kDa TBP-like protein) (TATA box-binding protein-related factor 2) (TBP-related factor 2) (TBP-like factor) (TBP-related protein)				1.23558	0.0131451	Up
P62482	Kcnab2 Ckbeta2 I2rf5 Kcnb3	Voltage-gated potassium channel subunit beta-2 (EC 1.1.1.-) (K(+) channel subunit beta-2) (Kv-beta-2) (Neuroimmune protein F5)	1.31328	0.00181185	Up	1.32359	0.00181185	Up
P62754	Rps6	40S ribosomal protein S6 (Phosphoprotein NP33)	0.895616	0.00216811	Down
P62806	H4c1 Hist1h4a; H4c2 H4-53 Hist1h4b; H4c3 H4-12 Hist1h4c; H4c4 Hist1h4d; H4c6 Hist1h4f; H4c8 Hist1h4h; H4c9 Hist1h4i; H4c11 Hist1h4j; H4c12 Hist1h4k; Hist1h4m; H4c14 Hist2h4 Hist2h4a; H4f16 Hist4h4	Histone H4	1.20865	1.32813e-05	Up	0.819798	1.32813e-05	Down
P62814	Atp6v1b2 Atp6b2 Vat2	V-type proton ATPase subunit B, brain isoform (V-ATPase subunit B 2) (Endomembrane proton pump 58 kDa subunit) (Vacuolar proton pump subunit B 2)	1.04793	0.000188025	Up	0.874602	0.000188025	Down
P62821	Rab1A Rab1	Ras-related protein Rab-1A (EC 3.6.5.2) (YPT1-related protein)				0.929303	0.0100308	Down
P62827	Ran Rasl2-8	GTP-binding nuclear protein Ran (GTPase Ran) (Ras-like protein TC4) (Ras-related nuclear protein)				1.19278	0.0376813	Up
P62830	Rpl23	60S ribosomal protein L23	0.939098	0.000129524	Down	1.04222	0.000129524	Up
P62852	Rps25	40S ribosomal protein S25	0.89997	0.0196959	Down
P62855	Rps26	40S ribosomal protein S26	0.951338	0.00393989	Down
P62858	Rps28	40S ribosomal protein S28	0.912092	0.0024739	Down	0.931788	0.0024739	Down
P62869	Elob Tceb2	Elongin-B (EloB) (Elongin 18 kDa subunit) (RNA polymerase II transcription factor SIII subunit B) (SIII p18) (Transcription elongation factor B polypeptide 2)	0.928704	0.00667942	Down
P62889	Rpl30	60S ribosomal protein L30				0.875199	0.0316842	Down
P62897	Cycs	Cytochrome c, somatic				0.818291	0.00239129	Down
P62915	Gtf2b	Transcription initiation factor IIB (EC 2.3.1.48) (General transcription factor TFIIB) (RNA polymerase II alpha initiation factor)	0.86039	0.0177881	Down
P62918	Rpl8	60S ribosomal protein L8				1.04005	0.0324754	Up
P62960	Ybx1 Msy-1 Msy1 Nsep1 Yb1	Y-box-binding protein 1 (YB-1) (CCAAT-binding transcription factor I subunit A) (CBF-A) (DNA-binding protein B) (DBPB) (Enhancer factor I subunit A) (EFI-A) (Nuclease-sensitive element-binding protein 1) (Y-box transcription factor)				0.903584	0.0399368	Down
P63005	Pafah1b1 Lis-1 Lis1 Pafaha	Platelet-activating factor acetylhydrolase IB subunit beta (Lissencephaly-1 protein) (LIS-1) (PAF acetylhydrolase 45 kDa subunit) (PAF-AH 45 kDa subunit) (PAF-AH alpha) (PAFAH alpha)				0.84352	0.0121212	Down
P63017	Hspa8 Hsc70 Hsc73	Heat shock cognate 71 kDa protein (EC 3.6.4.10) (Heat shock 70 kDa protein 8)	0.869515	3.14287e-05	Down	0.79399	3.14287e-05	Down
P63028	Tpt1 Trt	Translationally-controlled tumor protein (TCTP) (21 kDa polypeptide) (p21) (p23)	0.895576	2.93377e-05	Down	0.829629	2.93377e-05	Down
P63037	Dnaja1 Dnaj2 Hsj2 Hspf4	DnaJ homolog subfamily A member 1 (DnaJ protein homolog 2) (Heat shock 40 kDa protein 4) (Heat shock protein J2) (HSJ-2)	0.890171	0.00154178	Down
P63038	Hspd1 Hsp60	60 kDa heat shock protein, mitochondrial (EC 5.6.1.7) (60 kDa chaperonin) (Chaperonin 60) (CPN60) (HSP-65) (Heat shock protein 60) (HSP-60) (Hsp60) (Mitochondrial matrix protein P1)	0.924082	2.98103e-05	Down	0.716612	2.98103e-05	Down
P63073	Eif4e	Eukaryotic translation initiation factor 4E (eIF-4E) (eIF4E) (mRNA cap-binding protein) (eIF-4F 25 kDa subunit)	0.892801	0.0334506	Down	0.906401	0.0334506	Down
P63101	Ywhaz	14-3-3 protein zeta/delta (Protein kinase C inhibitor protein 1) (KCIP-1) (SEZ-2)				0.893432	0.00975241	Down
P63154	Crnkl1	Crooked neck-like protein 1 (Crooked neck homolog)	1.12304	9.4524e-05	Up	1.30412	9.4524e-05	Up
P63158	Hmgb1 Hmg-1 Hmg1	High mobility group protein B1 (High mobility group protein 1) (HMG-1)	1.12209	0.0140939	Up	1.16147	0.0140939	Up
P63166	Sumo1 Smt3c Smt3h3 Ubl1	Small ubiquitin-related modifier 1 (SUMO-1) (SMT3 homolog 3) (Ubiquitin-homology domain protein PIC1) (Ubiquitin-like protein SMT3C) (Smt3C)	0.880817	0.0120466	Down
P63254	Crip1 Crip	Cysteine-rich protein 1 (CRP-1) (Cysteine-rich intestinal protein) (CRIP)	1.58438	0.000122438	Up	1.76981	0.000122438	Up
P63276	Rps17	40S ribosomal protein S17	0.907469	0.00672685	Down
P63323	Rps12	40S ribosomal protein S12	0.900129	0.010591	Down	0.93847	0.010591	Down
P63328	Ppp3ca Calna	Serine/threonine-protein phosphatase 2B catalytic subunit alpha isoform (EC 3.1.3.16) (CAM-PRP catalytic subunit) (Calmodulin-dependent calcineurin A subunit alpha isoform) (CNA alpha)				1.17086	0.032807	Up
P63330	Ppp2ca	Serine/threonine-protein phosphatase 2A catalytic subunit alpha isoform (PP2A-alpha) (EC 3.1.3.16)	0.795355	0.000716925	Down	0.800213	0.000716925	Down
P67778	Phb	Prohibitin (B-cell receptor-associated protein 32) (BAP 32)				0.85419	0.0480415	Down
P68372	Tubb4b Tubb2c	Tubulin beta-4B chain (Tubulin beta-2C chain)	1.09148	0.000380239	Up	1.18318	0.000380239	Up
P68510	Ywhah	14-3-3 protein eta	0.932788	0.000489689	Down	0.880054	0.000489689	Down
P70168	Kpnb1 Impnb	Importin subunit beta-1 (Karyopherin subunit beta-1) (Nuclear factor p97) (Pore targeting complex 97 kDa subunit) (PTAC97) (SCG)				1.09175	0.0136686	Up
P70182	Pip5k1a	Phosphatidylinositol 4-phosphate 5-kinase type-1 alpha (PIP5K1-alpha) (PtdIns(4)P-5-kinase 1 alpha) (EC 2.7.1.68) (68 kDa type I phosphatidylinositol 4-phosphate 5-kinase alpha) (Phosphatidylinositol 4-phosphate 5-kinase type I alpha) (PIP5KIalpha) (Phosphatidylinositol 4-phosphate 5-kinase type I beta) (PI4P5KIbeta)	0.865423	0.00284956	Down	0.835855	0.00284956	Down
P70202	Lxn	Latexin (Endogenous carboxypeptidase inhibitor) (ECI) (Tissue carboxypeptidase inhibitor) (TCI)				0.809654	0.00144538	Down
P70218	Map4k1 Hpk1	Mitogen-activated protein kinase kinase kinase kinase 1 (EC 2.7.11.1) (Hematopoietic progenitor kinase) (HPK) (MAPK/ERK kinase kinase kinase 1) (MEK kinase kinase 1) (MEKKK 1)	1.12756	0.000135257	Up	1.23381	0.000135257	Up
P70248	Myo1f	Unconventional myosin-If				1.36297	0.0371873	Up
P70261	Pald1 Pald	Paladin	1.12841	0.00113308	Up	1.34392	0.00113308	Up
P70279	Surf6 Surf-6	Surfeit locus protein 6				1.04306	0.0190743	Up
P70290	Mpp1	55 kDa erythrocyte membrane protein (p55) (Membrane protein, palmitoylated 1)	0.849363	0.0105536	Down
P70303	Ctps2	CTP synthase 2 (EC 6.3.4.2) (CTP synthetase 2) (CTPsH) (UTP--ammonia ligase 2)				1.2603	0.0342891	Up
P70335	Rock1	Rho-associated protein kinase 1 (EC 2.7.11.1) (Rho-associated, coiled-coil-containing protein kinase 1) (Rho-associated, coiled-coil-containing protein kinase I) (ROCK-I) (p160 ROCK-1) (p160ROCK)	1.06584	0.0016806	Up	1.0557	0.0016806	Up
P70343	Casp4 Casp11 Caspl Ich3	Caspase-4 (CASP-4) (EC 3.4.22.64) (Caspase-11) (CASP-11) (Protease ICH-3) [Cleaved into: Caspase-4 subunit p10; Caspase-4 subunit p20]	0.793006	0.0456097	Down
P70347	Tank Itraf	TRAF family member-associated NF-kappa-B activator (TRAF-interacting protein) (I-TRAF)	0.935881	0.00662382	Down
P70372	Elavl1 Elra Hua	ELAV-like protein 1 (Elav-like generic protein) (Hu-antigen R) (HuR) (MelG)	0.853596	0.00187919	Down
P70380	Il18 Igif	Interleukin-18 (IL-18) (Interferon gamma-inducing factor) (IFN-gamma-inducing factor) (Interleukin-1 gamma) (IL-1 gamma)	0.698945	9.16357e-05	Down	0.86903	9.16357e-05	Down
P70388	Rad50	DNA repair protein RAD50 (mRad50) (EC 3.6.-.-)	1.14453	0.00039857	Up	1.31896	0.00039857	Up
P70398	Usp9x Fafl Fam	Probable ubiquitin carboxyl-terminal hydrolase FAF-X (EC 3.4.19.12) (Deubiquitinating enzyme FAF-X) (Fat facets homolog) (Fat facets protein-related, X-linked) (Ubiquitin carboxyl-terminal hydrolase FAM) (Ubiquitin thioesterase FAF-X) (Ubiquitin-specific protease 9, X chromosome) (Ubiquitin-specific-processing protease FAF-X)				1.15082	0.0385015	Up
P70429	Evl	Ena/VASP-like protein (Ena/vasodilator-stimulated phosphoprotein-like)	0.801449	1.73568e-05	Down	0.633391	1.73568e-05	Down
P70444	Bid	BH3-interacting domain death agonist (p22 BID) (BID) [Cleaved into: BH3-interacting domain death agonist p15 (p15 BID); BH3-interacting domain death agonist p13 (p13 BID); BH3-interacting domain death agonist p11 (p11 BID)]	1.1142	0.0265167	Up
P70460	Vasp	Vasodilator-stimulated phosphoprotein (VASP)	0.862499	0.000538389	Down	0.783712	0.000538389	Down
P70677	Casp3 Cpp32	Caspase-3 (CASP-3) (EC 3.4.22.56) (Apopain) (Cysteine protease CPP32) (CPP-32) (LICE) (Protein Yama) (SREBP cleavage activity 1) (SCA-1) [Cleaved into: Caspase-3 subunit p17; Caspase-3 subunit p12]	1.16001	0.0319648	Up	1.14639	0.0319648	Up
P80313	Cct7 Ccth	T-complex protein 1 subunit eta (TCP-1-eta) (CCT-eta)				0.913667	0.0496325	Down
P80314	Cct2 Cctb	T-complex protein 1 subunit beta (TCP-1-beta) (CCT-beta)	0.950715	0.0160882	Down	0.954942	0.0160882	Down
P80316	Cct5 Ccte Kiaa0098	T-complex protein 1 subunit epsilon (TCP-1-epsilon) (CCT-epsilon)	0.965892	0.0422702	Down	0.965153	0.0422702	Down
P80317	Cct6a Cct6 Cctz Cctz1	T-complex protein 1 subunit zeta (TCP-1-zeta) (CCT-zeta-1)	0.966206	0.00781699	Down	0.940432	0.00781699	Down
P80318	Cct3 Cctg	T-complex protein 1 subunit gamma (TCP-1-gamma) (CCT-gamma) (Matricin) (mTRiC-P5)	0.940529	0.0380948	Down
P81117	Nucb2 Nefa	Nucleobindin-2 (DNA-binding protein NEFA) (Prepronesfatin) [Cleaved into: Nesfatin-1]	0.949473	8.87751e-05	Down	0.76598	8.87751e-05	Down
P82343	Renbp	N-acylglucosamine 2-epimerase (AGE) (EC 5.1.3.8) (GlcNAc 2-epimerase) (N-acetyl-D-glucosamine 2-epimerase) (Renin-binding protein) (RnBP)				0.827316	0.00452736	Down
P83877	Txnl4a Dim1 Txnl4	Thioredoxin-like protein 4A (DIM1 protein homolog) (Spliceosomal U5 snRNP-specific 15 kDa protein) (Thioredoxin-like U5 snRNP protein U5-15kD)	0.834452	0.0134952	Down
P83917	Cbx1 Cbx	Chromobox protein homolog 1 (Heterochromatin protein 1 homolog beta) (HP1 beta) (Heterochromatin protein p25) (M31) (Modifier 1 protein)				0.774754	0.00424099	Down
P83940	Eloc Tceb1	Elongin-C (EloC) (Elongin 15 kDa subunit) (RNA polymerase II transcription factor SIII subunit C) (SIII p15) (Stromal membrane-associated protein SMAP1B homolog) (Transcription elongation factor B polypeptide 1)				1.17961	0.000389358	Up
P84104	Srsf3 Sfrs3 Srp20 X16	Serine/arginine-rich splicing factor 3 (Pre-mRNA-splicing factor SRP20) (Protein X16) (Splicing factor, arginine/serine-rich 3)	0.889091	0.000811869	Down	0.89898	0.000811869	Down
P85094	Isoc2a Isoc2	Isochorismatase domain-containing protein 2A				0.827264	0.00094615	Down
P97310	Mcm2 Bm28 Cdcl1 Kiaa0030 Mcmd2	DNA replication licensing factor MCM2 (EC 3.6.4.12) (Minichromosome maintenance protein 2 homolog) (Nuclear protein BM28)	1.11416	2.97484e-05	Up	1.31825	2.97484e-05	Up
P97311	Mcm6 Mcmd6 Mis5	DNA replication licensing factor MCM6 (EC 3.6.4.12) (Mis5 homolog)	1.17549	8.9483e-05	Up	1.37862	8.9483e-05	Up
P97363	Sptlc2 Lcb2	Serine palmitoyltransferase 2 (EC 2.3.1.50) (Long chain base biosynthesis protein 2) (LCB 2) (Long chain base biosynthesis protein 2a) (LCB2a) (Serine-palmitoyl-CoA transferase 2) (SPT 2)	0.689761	0.00616699	Down	0.711716	0.00616699	Down
P97369	Ncf4	Neutrophil cytosol factor 4 (NCF-4) (Neutrophil NADPH oxidase factor 4) (p40-phox) (p40phox)	1.04988	0.000168681	Up	1.1577	0.000168681	Up
P97370	Atp1b3	Sodium/potassium-transporting ATPase subunit beta-3 (Sodium/potassium-dependent ATPase subunit beta-3) (ATPB-3) (CD antigen CD298)				0.844211	0.0286559	Down
P97371	Psme1	Proteasome activator complex subunit 1 (11S regulator complex subunit alpha) (REG-alpha) (Activator of multicatalytic protease subunit 1) (Proteasome activator 28 subunit alpha) (PA28a) (PA28alpha)	0.888442	9.572e-06	Down	0.709353	9.572e-06	Down
P97372	Psme2 Pa28b1	Proteasome activator complex subunit 2 (11S regulator complex subunit beta) (REG-beta) (Activator of multicatalytic protease subunit 2) (Proteasome activator 28 subunit beta) (PA28b) (PA28beta)	0.889121	4.76483e-05	Down	0.753529	4.76483e-05	Down
P97386	Lig3	DNA ligase 3 (EC 6.5.1.1) (DNA ligase III) (Polydeoxyribonucleotide synthase [ATP] 3)	1.34859	0.000825201	Up	1.39253	0.000825201	Up
P97429	Anxa4 Anx4	Annexin A4 (Annexin IV) (Annexin-4)				0.761058	0.000120688	Down
P97449	Anpep Lap-1 Lap1	Aminopeptidase N (AP-N) (mAPN) (EC 3.4.11.2) (Alanyl aminopeptidase) (Aminopeptidase M) (AP-M) (Membrane protein p161) (Microsomal aminopeptidase) (CD antigen CD13)				0.725731	0.0303813	Down
P97450	Atp5pf Atp5j	ATP synthase-coupling factor 6, mitochondrial (ATPase subunit F6) (ATP synthase peripheral stalk subunit F6)	0.92977	1.93369e-05	Down	0.626412	1.93369e-05	Down
P97452	Bop1 Kiaa0124	Ribosome biogenesis protein BOP1 (Block of proliferation 1 protein)				1.05328	0.00925982	Up
P97470	Ppp4c Ppp4 Ppx	Serine/threonine-protein phosphatase 4 catalytic subunit (PP4C) (Pp4) (EC 3.1.3.16) (Protein phosphatase X) (PP-X)	0.781976	0.0326488	Down	0.779397	0.0326488	Down
P97477	Aurka Aik Airk Ark1 Aura Ayk1 Btak Iak1 Stk15 Stk6	Aurora kinase A (EC 2.7.11.1) (Aurora 2) (Aurora family kinase 1) (Aurora/IPL1-related kinase 1) (ARK-1) (Aurora-related kinase 1) (Ipl1- and aurora-related kinase 1) (Serine/threonine-protein kinase 6) (Serine/threonine-protein kinase Ayk1) (Serine/threonine-protein kinase aurora-A)	1.28169	0.000389007	Up	1.53277	0.000389007	Up
P97479	Myo7a Myo7	Unconventional myosin-VIIa	1.26358	0.00175207	Up	1.51108	0.00175207	Up
P97480	Eya3	Eyes absent homolog 3 (EC 3.1.3.48)	1.14529	0.000132133	Up	1.41474	0.000132133	Up
P97493	Txn2	Thioredoxin, mitochondrial (MTRX) (Mt-Trx) (Thioredoxin-2)				0.837777	3.14287e-05	Down
P97494	Gclc Glclc	Glutamate--cysteine ligase catalytic subunit (EC 6.3.2.2) (GCS heavy chain) (Gamma-ECS) (Gamma-glutamylcysteine synthetase)				1.24359	0.0145597	Up
P97496	Smarcc1 Baf155 Srg3	SWI/SNF complex subunit SMARCC1 (BRG1-associated factor 155) (SWI/SNF complex 155 kDa subunit) (SWI/SNF-related matrix-associated actin-dependent regulator of chromatin subfamily C member 1) (SWI3-related protein) (BAF155)				1.15231	0.0131746	Up
P97760	Polr2c Rpo2-3	DNA-directed RNA polymerase II subunit RPB3 (RNA polymerase II subunit 3) (RNA polymerase II subunit B3) (DNA-directed RNA polymerase II 33 kDa polypeptide) (RPB33) (DNA-directed RNA polymerase II subunit C) (RPB31)				1.30611	0.0109969	Up
P97789	Xrn1 Dhm2 Exo Sep1	5'-3' exoribonuclease 1 (mXRN1) (EC 3.1.13.-) (Protein Dhm2) (Strand-exchange protein 1 homolog)	0.892304	0.0089561	Down
P97797	Sirpa Bit Myd1 Ptpns1 Shps1 Sirp	Tyrosine-protein phosphatase non-receptor type substrate 1 (SHP substrate 1) (SHPS-1) (Brain Ig-like molecule with tyrosine-based activation motifs) (Bit) (CD172 antigen-like family member A) (Inhibitory receptor SHPS-1) (MyD-1 antigen) (Signal-regulatory protein alpha-1) (Sirp-alpha-1) (mSIRP-alpha1) (p84) (CD antigen CD172a)	1.31638	0.00932557	Up	1.37548	0.00932557	Up
P97807	Fh Fh1	Fumarate hydratase, mitochondrial (Fumarase) (EC 4.2.1.2) (EF-3)	0.96787	9.17642e-06	Down	0.839705	9.17642e-06	Down
P97814	Pstpip1	Proline-serine-threonine phosphatase-interacting protein 1 (PEST phosphatase-interacting protein 1)	0.870609	0.0161949	Down	0.812211	0.0161949	Down
P97821	Ctsc	Dipeptidyl peptidase 1 (EC 3.4.14.1) (Cathepsin C) (Cathepsin J) (Dipeptidyl peptidase I) (DPP-I) (DPPI) (Dipeptidyl transferase) [Cleaved into: Dipeptidyl peptidase 1 exclusion domain chain (Dipeptidyl peptidase I exclusion domain chain); Dipeptidyl peptidase 1 heavy chain (Dipeptidyl peptidase I heavy chain); Dipeptidyl peptidase 1 light chain (Dipeptidyl peptidase I light chain)]				0.781396	0.00275253	Down
P97822	Anp32e Cpd1	Acidic leucine-rich nuclear phosphoprotein 32 family member E (Cerebellar postnatal development protein 1) (LANP-like protein) (LANP-L)	1.11631	0.000942305	Up	1.25924	0.000942305	Up
P97825	Jpt1 Hn1	Jupiter microtubule associated homolog 1 (Hematological and neurological expressed 1 protein) [Cleaved into: Jupiter microtubule associated homolog 1, N-terminally processed]	1.05908	0.0043429	Up	0.939308	0.0043429	Down
P97855	G3bp1 G3bp	Ras GTPase-activating protein-binding protein 1 (G3BP-1) (EC 3.6.4.12) (EC 3.6.4.13) (ATP-dependent DNA helicase VIII) (GAP SH3 domain-binding protein 1) (HDH-VIII)	1.18112	0.000299286	Up	1.45119	0.000299286	Up
P97864	Casp7 Lice2 Mch3	Caspase-7 (CASP-7) (EC 3.4.22.60) (Apoptotic protease Mch-3) (Cysteine protease LICE2) [Cleaved into: Caspase-7 subunit p20; Caspase-7 subunit p11]				1.16019	0.000334859	Up
P97930	Dtymk Tmk	Thymidylate kinase (EC 2.7.4.9) (dTMP kinase)	1.19304	0.000143618	Up	1.48519	0.000143618	Up
P98078	Dab2 Doc2	Disabled homolog 2 (Adaptor molecule disabled-2) (Differentially expressed in ovarian carcinoma 2) (DOC-2) (Mitogen-responsive phosphoprotein)	0.863979	8.30194e-06	Down	0.672211	8.30194e-06	Down
P99024	Tubb5	Tubulin beta-5 chain	1.09079	0.000558397	Up	1.20518	0.000558397	Up
P99026	Psmb4 Lmp3	Proteasome subunit beta type-4 (Low molecular mass protein 3) (Macropain beta chain) (Multicatalytic endopeptidase complex beta chain) (Proteasome beta chain) (Proteasome chain 3)				0.842519	0.00472389	Down
P99027	Rplp2	60S acidic ribosomal protein P2	0.891405	0.021133	Down	0.896842	0.021133	Down
P99029	Prdx5 Prdx6	Peroxiredoxin-5, mitochondrial (EC 1.11.1.24) (Antioxidant enzyme B166) (AOEB166) (Liver tissue 2D-page spot 2D-0014IV) (PLP) (Peroxiredoxin V) (Prx-V) (Peroxisomal antioxidant enzyme) (Thioredoxin peroxidase PMP20) (Thioredoxin-dependent peroxiredoxin 5)	0.84768	5.42211e-06	Down	0.615646	5.42211e-06	Down
Q00422	Gabpa E4tf1a	GA-binding protein alpha chain (GABP subunit alpha)				1.25001	0.00588901	Up
Q00519	Xdh	Xanthine dehydrogenase/oxidase [Includes: Xanthine dehydrogenase (XD) (EC 1.17.1.4); Xanthine oxidase (XO) (EC 1.17.3.2) (Xanthine oxidoreductase) (XOR)]	1.14467	0.0169196	Up	1.14666	0.0169196	Up
Q00547	Hmmr Ihabp Rhamm	Hyaluronan mediated motility receptor (Intracellular hyaluronic acid-binding protein) (Receptor for hyaluronan-mediated motility) (CD antigen CD168)	1.41071	5.42211e-06	Up	1.663	5.42211e-06	Up
Q00612	G6pdx G6pd G6pd-1	Glucose-6-phosphate 1-dehydrogenase X (G6PD) (EC 1.1.1.49)				0.894577	0.00198376	Down
Q01320	Top2a Top-2 Top2	DNA topoisomerase 2-alpha (EC 5.6.2.2) (DNA topoisomerase II, alpha isozyme)	1.21356	0.000420721	Up	1.42291	0.000420721	Up
Q01514	Gbp1 Gbp-1 Mag-1 Mpa1	Guanylate-binding protein 1 (EC 3.6.5.-) (GTP-binding protein 1) (GBP-1) (mGBP-1) (mGBP1) (Guanine nucleotide-binding protein 1) (Interferon-gamma-inducible protein MAG-1) (Interferon-induced guanylate-binding protein 1)	0.823159	2.14872e-05	Down	0.597429	2.14872e-05	Down
Q01730	Rsu1 Rsp1	Ras suppressor protein 1 (RSP-1) (Rsu-1)				1.15473	0.011272	Up
Q01853	Vcp	Transitional endoplasmic reticulum ATPase (TER ATPase) (EC 3.6.4.6) (15S Mg(2+)-ATPase p97 subunit) (Valosin-containing protein) (VCP)				0.878391	0.000942305	Down
Q02053	Uba1 Sbx Ube1 Ube1ax Ube1x	Ubiquitin-like modifier-activating enzyme 1 (EC 6.2.1.45) (Ubiquitin-activating enzyme E1) (Ubiquitin-activating enzyme E1 X) (Ubiquitin-like modifier-activating enzyme 1 X)	0.923331	0.00117434	Down	0.852951	0.00117434	Down
Q02819	Nucb1 Nuc Nucb	Nucleobindin-1 (CALNUC)				0.851134	0.000555796	Down
Q03147	Cdk7 Cak Cdkn7 Crk4 Mo15 Mpk-7	Cyclin-dependent kinase 7 (EC 2.7.11.22) (EC 2.7.11.23) (39 kDa protein kinase) (P39 Mo15) (CDK-activating kinase) (CR4 protein kinase) (CRK4) (Cell division protein kinase 7) (Protein-tyrosine kinase MPK-7) (TFIIH basal transcription factor complex kinase subunit)				1.18701	0.0252849	Up
Q03265	Atp5f1a Atp5a1	ATP synthase subunit alpha, mitochondrial (ATP synthase F1 subunit alpha)	0.938746	2.19858e-05	Down	0.731613	2.19858e-05	Down
Q03963	Eif2ak2 Pkr Prkr Tik	Interferon-induced, double-stranded RNA-activated protein kinase (EC 2.7.11.1) (Eukaryotic translation initiation factor 2-alpha kinase 2) (eIF-2A protein kinase 2) (Interferon-inducible RNA-dependent protein kinase) (P1/eIF-2A protein kinase) (Protein kinase RNA-activated) (PKR) (Protein kinase R) (Serine/threonine-protein kinase TIK) (Tyrosine-protein kinase EIF2AK2) (EC 2.7.10.2) (p68 kinase)	0.681534	6.79634e-05	Down	0.67198	6.79634e-05	Down
Q04447	Ckb Ckbb	Creatine kinase B-type (EC 2.7.3.2) (B-CK) (Creatine kinase B chain) (Creatine phosphokinase B-type) (CPK-B)	1.11347	0.00143297	Up	1.21478	0.00143297	Up
Q04750	Top1 Top-1	DNA topoisomerase 1 (EC 5.6.2.1) (DNA topoisomerase I)	0.89054	0.000385619	Down	0.696055	0.000385619	Down
Q05144	Rac2	Ras-related C3 botulinum toxin substrate 2 (Protein EN-7) (p21-Rac2)				1.08876	0.0230495	Up
Q05186	Rcn1 Rca1 Rcn	Reticulocalbin-1	0.951617	0.0364227	Down
Q05512	Mark2 Emk	Serine/threonine-protein kinase MARK2 (EC 2.7.11.1) (EC 2.7.11.26) (ELKL motif kinase 1) (EMK-1) (MAP/microtubule affinity-regulating kinase 2) (PAR1 homolog) (PAR1 homolog b) (Par-1b) (mPar-1b)				1.33165	0.00223936	Up
Q05769	Ptgs2 Cox-2 Cox2 Pghs-b Tis10	Prostaglandin G/H synthase 2 (EC 1.14.99.1) (Cyclooxygenase-2) (COX-2) (Glucocorticoid-regulated inflammatory cyclooxygenase) (Gripghs) (Macrophage activation-associated marker protein P71/73) (PES-2) (PHS II) (Prostaglandin H2 synthase 2) (PGH synthase 2) (PGHS-2) (Prostaglandin-endoperoxide synthase 2) (TIS10 protein)	0.725145	0.00506852	Down	0.75255	0.00506852	Down
Q05816	Fabp5 Fabpe Klbp Mal1	Fatty acid-binding protein 5 (Epidermal-type fatty acid-binding protein) (E-FABP) (Fatty acid-binding protein, epidermal) (Keratinocyte lipid-binding protein) (Psoriasis-associated fatty acid-binding protein homolog) (PA-FABP)				0.866912	4.42535e-05	Down
Q05860	Fmn1 Fmn Ld	Formin-1 (Limb deformity protein)	0.882989	0.00251304	Down	0.784903	0.00251304	Down
Q05915	Gch1 Gch	GTP cyclohydrolase 1 (EC 3.5.4.16) (GTP cyclohydrolase I) (GTP-CH-I)	0.734018	0.000448682	Down	0.662107	0.000448682	Down
Q06185	Atp5me Atp5i Atp5k Lfm-1 Lfm1	ATP synthase subunit e, mitochondrial (ATPase subunit e) (ATP synthase membrane subunit e)				0.620085	1.67729e-05	Down
Q07076	Anxa7 Anx7	Annexin A7 (Annexin VII) (Annexin-7) (Synexin)	0.811837	0.00120124	Down	0.767536	0.00120124	Down
Q07797	Lgals3bp Cycap Mama	Galectin-3-binding protein (Cyp-C-associated protein) (CyCAP) (Lectin galactoside-binding soluble 3-binding protein) (Protein MAMA)	0.893554	0.000253878	Down	0.65848	0.000253878	Down
Q07832	Plk1 Plk	Serine/threonine-protein kinase PLK1 (EC 2.7.11.21) (Polo-like kinase 1) (PLK-1) (Serine/threonine-protein kinase 13) (STPK13)	1.27331	0.000299286	Up	1.56036	0.000299286	Up
Q08509	Eps8	Epidermal growth factor receptor kinase substrate 8				0.902467	0.00849598	Down
Q08857	Cd36	Platelet glycoprotein 4 (Glycoprotein IIIb) (GPIIIB) (PAS IV) (PAS-4) (Platelet glycoprotein IV) (GPIV) (CD antigen CD36)				0.639443	0.00113308	Down
Q08943	Ssrp1	FACT complex subunit SSRP1 (Facilitates chromatin transcription complex subunit SSRP1) (Recombination signal sequence recognition protein 1) (Structure-specific recognition protein 1) (T160)				1.2621	0.00295918	Up
Q09014	Ncf1	Neutrophil cytosol factor 1 (NCF-1) (47 kDa neutrophil oxidase factor) (NCF-47K) (Neutrophil NADPH oxidase factor 1) (p47-phox)	1.13814	0.000638955	Up	1.28111	0.000638955	Up
Q0GNC1	Inf2	Inverted formin-2	1.12802	0.000677394	Up	1.27772	0.000677394	Up
Q0P5W1	Vps8 Kiaa0804	Vacuolar protein sorting-associated protein 8 homolog	1.32647	1.89808e-05	Up	1.4449	1.89808e-05	Up
Q0VGY8	Tanc1	Protein TANC1 (Tetratricopeptide repeat, ankyrin repeat and coiled-coil domain-containing protein 1)	1.14111	0.00253112	Up	1.14435	0.00253112	Up
Q11011	Npepps Psa	Puromycin-sensitive aminopeptidase (PSA) (EC 3.4.11.14) (Cytosol alanyl aminopeptidase) (AAP-S)				0.915858	0.00255664	Down
Q148V7	Relch Kiaa1468	RAB11-binding protein RELCH (LisH domain and HEAT repeat-containing protein KIAA1468) (RAB11-binding protein containing LisH, coiled-coil, and HEAT repeats)				1.18401	0.0463118	Up
Q14C51	Ptcd3 Mrps39	Pentatricopeptide repeat domain-containing protein 3, mitochondrial (28S ribosomal protein S39, mitochondrial) (MRP-S39)	0.951145	0.00233676	Down	0.876778	0.00233676	Down
Q1HFZ0	Nsun2 D13Wsu123e Misu	RNA cytosine C(5)-methyltransferase NSUN2 (EC 2.1.1.-) (Myc-induced SUN domain-containing protein) (Misu) (NOL1/NOP2/Sun domain family member 2) (mRNA cytosine C(5)-methyltransferase) (EC 2.1.1.-) (tRNA cytosine C(5)-methyltransferase) (EC 2.1.1.-) (EC 2.1.1.203)				1.05378	0.0290353	Up
Q2EMV9	Parp14 Kiaa1268	Protein mono-ADP-ribosyltransferase PARP14 (EC 2.4.2.-) (ADP-ribosyltransferase diphtheria toxin-like 8) (ARTD8) (Collaborator of STAT6) (CoaSt6) (Poly [ADP-ribose] polymerase 14) (PARP-14)	0.685826	2.02575e-05	Down	0.761243	2.02575e-05	Down
Q2TBA3	Malt1	Mucosa-associated lymphoid tissue lymphoma translocation protein 1 homolog (EC 3.4.22.-) (Paracaspase)	0.656237	3.62452e-06	Down
Q2YDW2	Msto1	Protein misato homolog 1				1.21629	0.0010488	Up
Q3B7Z2	Osbp Kiaa4220	Oxysterol-binding protein 1				1.11089	0.0300701	Up
Q3TBD2	Arhgap45 Hmha1	Rho GTPase-activating protein 45 (Minor histocompatibility protein HA-1)	1.13227	0.000214098	Up	1.2551	0.000214098	Up
Q3TC46	Patl1	Protein PAT1 homolog 1 (PAT1-like protein 1) (Protein PAT1 homolog b) (Pat1b)	0.943948	0.0448498	Down
Q3TC72	Fahd2 Fahd2a	Fumarylacetoacetate hydrolase domain-containing protein 2A (EC 3.-.-.-)	0.929146	0.000224425	Down	0.797008	0.000224425	Down
Q3TC93	Hs1bp3	HCLS1-binding protein 3 (HS1-binding protein 3) (HSP1BP-3)	1.40042	3.18663e-05	Up	1.53674	3.18663e-05	Up
Q3TCX3	Khdc4 Blom7 Kiaa0907	KH homology domain-containing protein 4 (Brings lots of money 7) (Pre-mRNA splicing factor protein Khdc4)				1.04555	0.0108602	Up
Q3TEA8	Hp1bp3	Heterochromatin protein 1-binding protein 3	1.13388	0.00291109	Up
Q3TGF2	Fam107b	Protein FAM107B	1.09631	0.00136316	Up	1.23555	0.00136316	Up
Q3THE2	Myl12b Mrlc2 Mylc2b	Myosin regulatory light chain 12B (Myosin regulatory light chain 2-B, smooth muscle isoform) (Myosin regulatory light chain 20 kDa) (MLC20) (Myosin regulatory light chain MRLC2)				0.757535	0.000710091	Down
Q3THG9	Aarsd1 Alax	Alanyl-tRNA editing protein Aarsd1 (Alanyl-tRNA deacylase alaX) (AlaX) (AlaXp-II) (Alanyl-tRNA synthetase domain-containing protein 1)				1.33103	0.0334154	Up
Q3THJ3	Eif1ad	Probable RNA-binding protein EIF1AD (Eukaryotic translation initiation factor 1A domain-containing protein)				1.1615	0.0291344	Up
Q3THK3	Gtf2f1	General transcription factor IIF subunit 1 (Transcription initiation factor IIF subunit alpha) (TFIIF-alpha)				0.896012	0.00419726	Down
Q3THS6	Mat2a	S-adenosylmethionine synthase isoform type-2 (AdoMet synthase 2) (EC 2.5.1.6) (Methionine adenosyltransferase 2) (MAT 2)	0.778261	0.000659605	Down	0.723713	0.000659605	Down
Q3TIR3	Ric8a Ric8	Synembryn-A (Protein Ric-8A)	0.912404	0.0162452	Down	0.871871	0.0162452	Down
Q3TJZ6	Fam98a	Protein FAM98A				1.31759	0.00330007	Up
Q3TLH4	Prrc2c Bat2d Bat2d1 Bat2l2 Kiaa1096	Protein PRRC2C (BAT2 domain-containing protein 1) (HLA-B-associated transcript 2-like 2) (Proline-rich and coiled-coil-containing protein 2C)	0.837293	0.0332141	Down	0.852297	0.0332141	Down
Q3TMH2	Scrn3	Secernin-3	1.30937	0.000320348	Up	1.47799	0.000320348	Up
Q3TN34	Micall2 Jrab	MICAL-like protein 2 (Junctional Rab13-binding protein) (Molecule interacting with CasL-like 2) (MICAL-L2)	0.717996	4.68913e-05	Down	0.679322	4.68913e-05	Down
Q3TNA1	Xylb	Xylulose kinase (Xylulokinase) (EC 2.7.1.17)	1.17929	0.0214818	Up	1.23437	0.0214818	Up
Q3TPE9	Ankmy2	Ankyrin repeat and MYND domain-containing protein 2	1.29086	0.0164682	Up	1.45972	0.0164682	Up
Q3TPX4	Exoc5 Sec10l1	Exocyst complex component 5 (Exocyst complex component Sec10)	1.23141	0.000886392	Up	1.52489	0.000886392	Up
Q3TRM8	Hk3	Hexokinase-3 (EC 2.7.1.1) (Hexokinase type III) (HK III) (Hexokinase-C)				0.814534	2.8698e-05	Down
Q3TSG4	Alkbh5 Abh5 Ofoxd	RNA demethylase ALKBH5 (EC 1.14.11.-) (Alkylated DNA repair protein alkB homolog 5) (Alpha-ketoglutarate-dependent dioxygenase alkB homolog 5)	1.30101	0.000375951	Up	1.39799	0.000375951	Up
Q3TUH1	Tamm41	Phosphatidate cytidylyltransferase, mitochondrial (EC 2.7.7.41) (CDP-diacylglycerol synthase) (CDP-DAG synthase) (Mitochondrial translocator assembly and maintenance protein 41 homolog) (TAM41)	0.737087	0.0479487	Down
Q3TUU5	Tex30	Testis-expressed protein 30	1.3106	2.66913e-05	Up	1.64862	2.66913e-05	Up
Q3TW96	Uap1l1	UDP-N-acetylhexosamine pyrophosphorylase-like protein 1 (EC 2.7.7.-)	1.08606	0.0410038	Up	1.07837	0.0410038	Up
Q3TWF6	Wdr70	WD repeat-containing protein 70				1.06444	0.0145986	Up
Q3TXS7	Psmd1	26S proteasome non-ATPase regulatory subunit 1 (26S proteasome regulatory subunit RPN2) (26S proteasome regulatory subunit S1)				0.896541	0.00556434	Down
Q3TXU5	Dhps	Deoxyhypusine synthase (DHS) (EC 2.5.1.46)				0.784779	0.0157688	Down
Q3TZX8	Nol9	Polynucleotide 5'-hydroxyl-kinase NOL9 (EC 2.7.1.-) (Nucleolar protein 9)				1.21788	0.0036334	Up
Q3U0B3	Dhrs11 Sdr24c1	Dehydrogenase/reductase SDR family member 11 (17-beta-hydroxysteroid dehydrogenase) (3-beta-hydroxysteroid 3-dehydrogenase) (EC 1.1.1.270) (Estradiol 17-beta-dehydrogenase) (EC 1.1.1.62) (Short-chain dehydrogenase/reductase family 24C member 1)				0.942259	0.0337337	Down
Q3U0V2	Tradd	Tumor necrosis factor receptor type 1-associated DEATH domain protein (TNFR1-associated DEATH domain protein) (TNFRSF1A-associated via death domain)	1.10484	0.00192663	Up	1.22309	0.00192663	Up
Q3U182	Crtc2 Torc2	CREB-regulated transcription coactivator 2 (Transducer of regulated cAMP response element-binding protein 2) (TORC-2) (Transducer of CREB protein 2)	0.652643	0.00241071	Down
Q3U186	Rars2 Rarsl	Probable arginine--tRNA ligase, mitochondrial (EC 6.1.1.19) (Arginyl-tRNA synthetase) (ArgRS)				0.734862	0.0389549	Down
Q3U1G5	Isg20l2	Interferon-stimulated 20 kDa exonuclease-like 2 (EC 3.1.-.-)				1.44087	0.000902789	Up
Q3U1J4	Ddb1	DNA damage-binding protein 1 (DDB p127 subunit) (Damage-specific DNA-binding protein 1) (UV-damaged DNA-binding factor)	1.12786	0.0475871	Up
Q3U1T3	Brms1l	Breast cancer metastasis-suppressor 1-like protein	1.23509	0.000389358	Up	1.28078	0.000389358	Up
Q3U1V6	Uevld Attp Uev3	Ubiquitin-conjugating enzyme E2 variant 3 (UEV-3) (EV and lactate/malate dehydrogenase domain-containing protein)	1.11074	7.95714e-05	Up	1.49816	7.95714e-05	Up
Q3U487	Hectd3	E3 ubiquitin-protein ligase HECTD3 (EC 2.3.2.26) (HECT domain-containing protein 3) (HECT-type E3 ubiquitin transferase HECTD3)	1.17797	0.0121823	Up	1.14094	0.0121823	Up
Q3U5Q7	Cmpk2 Tyki	UMP-CMP kinase 2, mitochondrial (EC 2.7.4.14) (Nucleoside-diphosphate kinase) (EC 2.7.4.6) (Thymidylate kinase LPS-inducible member) (TYKi)	0.814549	2.61848e-06	Down	0.610189	2.61848e-06	Down
Q3U6N9		UPF0488 protein C8orf33 homolog	1.08061	0.00643901	Up	1.06443	0.00643901	Up
Q3U821	Wdr75 Utp17	WD repeat-containing protein 75 (U3 small nucleolar RNA-associated protein 17 homolog)	1.25873	0.0269366	Up	1.2968	0.0269366	Up
Q3UA16	Spc25 Spbc25	Kinetochore protein Spc25	1.44562	0.000148614	Up	1.7028	0.000148614	Up
Q3UCV8	Otulin Fam105b Gum	Ubiquitin thioesterase otulin (EC 3.4.19.12) (Deubiquitinating enzyme otulin) (OTU domain-containing deubiquitinase with linear linkage specificity) (Ubiquitin thioesterase Gumby)				1.48201	0.00640202	Up
Q3UDE2	Ttll12	Tubulin--tyrosine ligase-like protein 12 (Inactive tubulin--tyrosine ligase-like protein 12)	1.09065	0.00138079	Up	1.16472	0.00138079	Up
Q3UDK1	Trafd1 Fln29	TRAF-type zinc finger domain-containing protein 1 (Protein FLN29)	0.656043	0.000181193	Down	0.827825	0.000181193	Down
Q3UFB2	Znhit6 Bcd1	Box C/D snoRNA protein 1 (Zinc finger HIT domain-containing protein 6)	1.26272	0.0163615	Up	1.32494	0.0163615	Up
Q3UFM5	Nom1 Gm1040	Nucleolar MIF4G domain-containing protein 1 (SGD1 homolog)				1.35489	0.0128258	Up
Q3UG98	Nat9	N-acetyltransferase 9 (EC 2.3.1.-)	0.913802	0.00180953	Down	0.82654	0.00180953	Down
Q3UGY8	Arfgef3 Big3 D10Bwg1379e Kiaa1244	Brefeldin A-inhibited guanine nucleotide-exchange protein 3 (ARFGEF family member 3)				1.21071	0.0160981	Up
Q3UHD6	Snx27 Kiaa0488	Sorting nexin-27	1.12755	0.000563691	Up	1.40822	0.000563691	Up
Q3UHX2	Pdap1	28 kDa heat- and acid-stable phosphoprotein (PDGF-associated protein) (PAP) (PDGFA-associated protein 1) (PAP1)				0.931217	0.035175	Down
Q3UIA2	Arhgap17	Rho GTPase-activating protein 17 (Neuron-associated developmentally-regulated protein) (Nadrin) (Rho-type GTPase-activating protein 17)	1.12831	3.14287e-05	Up	1.28357	3.14287e-05	Up
Q3UIR3	Dtx3l Bbap	E3 ubiquitin-protein ligase DTX3L (EC 2.3.2.27) (Protein deltex-3-like) (RING-type E3 ubiquitin transferase DTX3L)	0.780106	0.000551253	Down	0.765448	0.000551253	Down
Q3UIW5	Rnf10 Kiaa0262 Rie2 Sid2705	RING finger protein 10 (Sid 2705)	0.814312	0.00473652	Down
Q3UJB9	Edc4	Enhancer of mRNA-decapping protein 4				1.16518	0.0258418	Up
Q3UJD6	Usp19 Kiaa0891	Ubiquitin carboxyl-terminal hydrolase 19 (EC 3.4.19.12) (Deubiquitinating enzyme 19) (Ubiquitin thioesterase 19) (Ubiquitin-specific-processing protease 19)	1.21991	0.000358343	Up	1.31759	0.000358343	Up
Q3UJP5		Protein C8orf37 homolog	1.23384	0.00069432	Up	1.47461	0.00069432	Up
Q3UJV1	Ccdc61 Gm159 VFL3	Centrosomal protein CCDC61 (Coiled-coil domain-containing protein 61) (VFL3 homolog)	1.15942	0.000909608	Up	1.38394	0.000909608	Up
Q3UK78	Pcgf5 Rnf159	Polycomb group RING finger protein 5 (RING finger protein 159)	0.806048	0.000260683	Down
Q3UKC1	Tax1bp1	Tax1-binding protein 1 homolog	1.43957	0.000698816	Up	1.41261	0.000698816	Up
Q3ULD5	Mccc2	Methylcrotonoyl-CoA carboxylase beta chain, mitochondrial (MCCase subunit beta) (EC 6.4.1.4) (3-methylcrotonyl-CoA carboxylase 2) (3-methylcrotonyl-CoA carboxylase non-biotin-containing subunit) (3-methylcrotonyl-CoA:carbon dioxide ligase subunit beta)				0.67809	0.00095392	Down
Q3ULJ0	Gpd1l Kiaa0089	Glycerol-3-phosphate dehydrogenase 1-like protein (EC 1.1.1.8)	1.18865	0.0177585	Up	1.17986	0.0177585	Up
Q3ULW8	Parp3 Adprt3	Protein mono-ADP-ribosyltransferase PARP3 (EC 2.4.2.-) (ADP-ribosyltransferase diphtheria toxin-like 3) (ARTD3) (DNA ADP-ribosyltransferase PARP3) (EC 2.4.2.-) (NAD(+) ADP-ribosyltransferase 3) (ADPRT-3) (Poly [ADP-ribose] polymerase 3) (PARP-3) (Poly[ADP-ribose] synthase 3) (pADPRT-3)	0.893921	0.00369753	Down	0.814046	0.00369753	Down
Q3UN90	Lyrm9	LYR motif-containing protein 9				0.777244	0.00831441	Down
Q3UNA4	Nxt2	NTF2-related export protein 2	0.779372	0.000483216	Down	1.18985	0.000483216	Up
Q3UND0	Skap2 Prap Ra70 Saps Scap2 Skap55r	Src kinase-associated phosphoprotein 2 (Pyk2/RAFTK-associated protein) (SKAP55 homolog) (SKAP-HOM) (Src family-associated phosphoprotein 2) (Src kinase-associated phosphoprotein 55-related protein) (Src-associated adapter protein with PH and SH3 domains)	0.890683	0.00125971	Down	0.825	0.00125971	Down
Q3UPF5	Zc3hav1	Zinc finger CCCH-type antiviral protein 1 (ADP-ribosyltransferase diphtheria toxin-like 13) (ARTD13) (Inactive Poly [ADP-ribose] polymerase 13) (PARP13)				1.13697	0.00298632	Up
Q3UQN2	Fcho2	F-BAR domain only protein 2				1.37123	0.00625446	Up
Q3URQ0	Tex10	Testis-expressed protein 10				1.12232	0.0279493	Up
Q3UW53	Niban1 Fam129a Niban	Protein Niban 1 (Protein FAM129A) (Protein Niban)	0.872601	0.0103379	Down
Q3UY34	Custos	Protein CUSTOS				1.05621	0.0385978	Up
Q3UZ39	Lrrfip1 Flap	Leucine-rich repeat flightless-interacting protein 1 (LRR FLII-interacting protein 1) (FLI-LRR-associated protein 1) (Flap-1) (H186 FLAP)	0.955017	0.00211077	Down	0.913335	0.00211077	Down
Q3V1L4	Nt5c2	Cytosolic purine 5'-nucleotidase (EC 3.1.3.5) (Cytosolic 5'-nucleotidase II)	1.32406	0.00467511	Up	1.39141	0.00467511	Up
Q3V1V3	Esf1 Abtap	ESF1 homolog (ABT1-associated protein)	0.818065	0.00106652	Down	1.12081	0.00106652	Up
Q3V3R1	Mthfd1l Fthfsdc1	Monofunctional C1-tetrahydrofolate synthase, mitochondrial (EC 6.3.4.3) (Formyltetrahydrofolate synthetase)	0.895636	0.00307464	Down	0.869678	0.00307464	Down
Q3V4B5	Commd6	COMM domain-containing protein 6				1.17028	0.0304281	Up
Q4QRL3	Ccdc88b Ccdc88	Coiled-coil domain-containing protein 88B (Gipie) (Hook-related protein 3) (HkRP3)				1.22291	0.00424099	Up
Q4VA53	Pds5b Aprin As3 Kiaa0979	Sister chromatid cohesion protein PDS5 homolog B (Androgen-induced proliferation inhibitor) (Androgen-induced prostate proliferative shutoff-associated protein AS3)				1.16099	0.0330387	Up
Q4VAA2	Cdv3	Protein CDV3 (Carnitine deficiency-associated protein 3) (Tyrosine-phosphorylated protein 36) (TPP36)	0.922856	0.00138079	Down	0.87032	0.00138079	Down
Q4VBE8	Wdr18	WD repeat-containing protein 18				1.21214	0.0123189	Up
Q4VGL6	Rc3h1 Gm551 Kiaa2025	Roquin-1 (Roquin) (EC 2.3.2.27) (Protein Sanroque) (RING finger and C3H zinc finger protein 1) (RING finger and CCCH-type zinc finger domain-containing protein 1)	0.888871	0.0132052	Down
Q501J6	Ddx17	Probable ATP-dependent RNA helicase DDX17 (EC 3.6.4.13) (DEAD box protein 17)	1.10023	0.00452133	Up	1.19549	0.00452133	Up
Q505B7	Zbtb8os Arch	Protein archease (Protein ZBTB8OS)	1.44655	0.0325312	Up	1.39065	0.0325312	Up
Q52KI8	Srrm1 Pop101	Serine/arginine repetitive matrix protein 1 (Plenty-of-prolines 101)				0.760046	0.00474498	Down
Q571H0	Urb1 Kiaa0539 Npa1	Nucleolar pre-ribosomal-associated protein 1 (URB1 ribosome biogenesis 1 homolog)				1.241	0.00340722	Up
Q58A65	Spag9 Jip4 Jsap2 Kiaa0516 Mapk8ip4	C-Jun-amino-terminal kinase-interacting protein 4 (JIP-4) (JNK-interacting protein 4) (JNK-associated leucine-zipper protein) (JLP) (JNK/SAPK-associated protein 2) (JSAP2) (Mitogen-activated protein kinase 8-interacting protein 4) (Sperm-associated antigen 9)	0.936797	0.00243652	Down	0.871191	0.00243652	Down
Q5DTM8	Rnf20 Bre1a Kiaa4116	E3 ubiquitin-protein ligase BRE1A (BRE1-A) (EC 2.3.2.27) (RING finger protein 20) (RING-type E3 ubiquitin transferase BRE1A)				1.07487	0.00252007	Up
Q5F2E7	Nufip2 Kiaa1321	Nuclear fragile X mental retardation-interacting protein 2 (82 kDa FMRP-interacting protein) (82-FIP) (FMRP-interacting protein 2)	0.805457	0.00619765	Down
Q5NC05	Ttf2	Transcription termination factor 2 (EC 3.6.4.-) (RNA polymerase II termination factor) (Transcription release factor 2)	1.13221	0.0161453	Up	1.18499	0.0161453	Up
Q5NCQ5	Dph1 Dph2l1 Ovca1	2-(3-amino-3-carboxypropyl)histidine synthase subunit 1 (EC 2.5.1.108) (Diphthamide biosynthesis protein 1) (Diphtheria toxin resistance protein 1) (Ovarian cancer-associated gene 1 protein homolog) (S-adenosyl-L-methionine:L-histidine 3-amino-3-carboxypropyltransferase 1)	1.18563	0.00095392	Up	1.56102	0.00095392	Up
Q5NCR9	Nsrp1 Ccdc55 Nsrp70	Nuclear speckle splicing regulatory protein 1 (Coiled-coil domain-containing protein 55) (Nuclear speckle-related protein 70) (NSrp70)				0.865606	0.0135754	Down
Q5SSK3	Tefm	Transcription elongation factor, mitochondrial				0.566478	0.00358828	Down
Q5SSW2	Psme4 Kiaa0077	Proteasome activator complex subunit 4 (Proteasome activator PA200) (Protein TEMO)				0.812723	0.00734336	Down
Q5SSZ5	Tns3 Tens1	Tensin-3 (Tensin-like SH2 domain-containing protein 1)				1.0725	0.00253112	Up
Q5SU73	Coil CLN80	Coilin (p80-coilin)				1.29864	0.0170711	Up
Q5SUF2	Luc7l3 Crop	Luc7-like protein 3 (Cisplatin resistance-associated-overexpressed protein)	0.843574	0.011272	Down	0.838849	0.011272	Down
Q5SUQ9	Ctc1	CST complex subunit CTC1 (Alpha-accessory factor of 132 kDa) (AAF-132) (AAF132) (Conserved telomere maintenance component 1)	1.34908	0.0484442	Up	1.35483	0.0484442	Up
Q5SUR0	Pfas Kiaa0361	Phosphoribosylformylglycinamidine synthase (FGAM synthase) (FGAMS) (EC 6.3.5.3) (Formylglycinamide ribonucleotide amidotransferase) (FGAR amidotransferase) (FGAR-AT) (Formylglycinamide ribotide amidotransferase)	1.08879	0.0142171	Up	1.09883	0.0142171	Up
Q5SWU9	Acaca Acac Gm738	Acetyl-CoA carboxylase 1 (ACC1) (EC 6.4.1.2) (ACC-alpha) (Acetyl-CoA carboxylase 265)				1.24345	0.00125879	Up
Q5SXY1	Specc1 Cytsb Kiaa4061	Cytospin-B (Sperm antigen with calponin homology and coiled-coil domains 1)	1.09485	0.0116216	Up	1.13015	0.0116216	Up
Q5U3K5	Rabl6 Parf	Rab-like protein 6 (GTP-binding protein Parf) (Rab-like protein 1) (RBEL1)				1.16346	0.0456127	Up
Q5XJE5	Leo1 Gm185	RNA polymerase-associated protein LEO1				1.22222	0.00311148	Up
Q5XJY5	Arcn1 Copd	Coatomer subunit delta (Archain) (Delta-coat protein) (Delta-COP)				1.11591	0.00344454	Up
Q60520	Sin3a Kiaa4126	Paired amphipathic helix protein Sin3a (Histone deacetylase complex subunit Sin3a) (Transcriptional corepressor Sin3a)	1.11864	0.000173503	Up	1.24418	0.000173503	Up
Q60597	Ogdh Kiaa4192	2-oxoglutarate dehydrogenase, mitochondrial (EC 1.2.4.2) (2-oxoglutarate dehydrogenase complex component E1) (OGDC-E1) (Alpha-ketoglutarate dehydrogenase)	0.92453	0.000550183	Down	0.72613	0.000550183	Down
Q60605	Myl6 Myln	Myosin light polypeptide 6 (17 kDa myosin light chain) (LC17) (Myosin light chain 3) (MLC-3) (Myosin light chain alkali 3) (Myosin light chain A3) (Smooth muscle and nonmuscle myosin light chain alkali 6)				0.922555	0.00114397	Down
Q60668	Hnrnpd Auf1 Hnrpd	Heterogeneous nuclear ribonucleoprotein D0 (hnRNP D0) (AU-rich element RNA-binding protein 1)				0.900468	0.00350598	Down
Q60676	Ppp5c	Serine/threonine-protein phosphatase 5 (PP5) (EC 3.1.3.16) (Protein phosphatase T) (PPT)	1.04204	0.00215091	Up	1.08581	0.00215091	Up
Q60710	Samhd1 Mg21	Deoxynucleoside triphosphate triphosphohydrolase SAMHD1 (dNTPase) (EC 3.1.5.-) (Interferon-gamma-inducible protein Mg11) (SAM domain and HD domain-containing protein 1) (mSAMHD1)	0.910217	2.48189e-05	Down	0.698846	2.48189e-05	Down
Q60715	P4ha1	Prolyl 4-hydroxylase subunit alpha-1 (4-PH alpha-1) (EC 1.14.11.2) (Procollagen-proline,2-oxoglutarate-4-dioxygenase subunit alpha-1)	0.835046	5.07673e-05	Down	0.801472	5.07673e-05	Down
Q60739	Bag1	BAG family molecular chaperone regulator 1 (BAG-1) (Bcl-2-associated athanogene 1)	1.0547	0.00609633	Up	1.10966	0.00609633	Up
Q60749	Khdrbs1	KH domain-containing, RNA-binding, signal transduction-associated protein 1 (GAP-associated tyrosine phosphoprotein p62) (Src-associated in mitosis 68 kDa protein) (Sam68) (p21 Ras GTPase-activating protein-associated p62) (p68)	0.969048	0.0117232	Down	0.951342	0.0117232	Down
Q60775	Elf1	ETS-related transcription factor Elf-1 (E74-like factor 1)	1.50789	9.89579e-06	Up	1.66684	9.89579e-06	Up
Q60780	Gas7	Growth arrest-specific protein 7 (GAS-7)	1.25611	1.89808e-05	Up	1.34676	1.89808e-05	Up
Q60787	Lcp2	Lymphocyte cytosolic protein 2 (SH2 domain-containing leukocyte protein of 76 kDa) (SLP-76 tyrosine phosphoprotein) (SLP76)	0.695276	6.20056e-05	Down	0.754086	6.20056e-05	Down
Q60809	Cnot7 Caf1	CCR4-NOT transcription complex subunit 7 (EC 3.1.13.4) (CCR4-associated factor 1) (CAF-1)	1.17409	0.0128258	Up	1.19991	0.0128258	Up
Q60838	Dvl2	Segment polarity protein dishevelled homolog DVL-2 (Dishevelled-2) (DSH homolog 2)	1.40358	0.00110665	Up	1.47407	0.00110665	Up
Q60848	Hells Lsh Pasg	Lymphocyte-specific helicase (EC 3.6.4.-) (Proliferation-associated SNF2-like protein)				1.45651	0.0135355	Up
Q60854	Serpinb6 Serpinb6a Spi3	Serpin B6 (Placental thrombin inhibitor) (Proteinase inhibitor 6) (PI-6)				0.927908	0.0292888	Down
Q60855	Ripk1 Rinp Rip	Receptor-interacting serine/threonine-protein kinase 1 (EC 2.7.11.1) (Cell death protein RIP) (Receptor-interacting protein 1) (RIP-1)				1.13233	0.020416	Up
Q60862	Orc2 Orc2l	Origin recognition complex subunit 2	1.145	0.0247058	Up	1.11884	0.0247058	Up
Q60865	Caprin1 Gpiap Gpiap1 Gpip137 M11s1 Rng105 G5E5	Caprin-1 (Cytoplasmic activation- and proliferation-associated protein 1) (GPI-anchored membrane protein 1) (GPI-anchored protein p137) (GPI-p137) (p137GPI) (Membrane component chromosome 11 surface marker 1) (RNA granule protein 105)	0.931021	0.00155988	Down	1.10399	0.00155988	Up
Q60902	Eps15l1 Eps15-rs Eps15R	Epidermal growth factor receptor substrate 15-like 1 (Epidermal growth factor receptor pathway substrate 15-related sequence) (Eps15-rs) (Eps15-related protein) (Eps15R)				1.16908	0.000160248	Up
Q60949	Tbc1d1 Kiaa1108 Tbc1	TBC1 domain family member 1				0.859229	0.00594034	Down
Q60953	Pml	Protein PML	0.846397	0.000329699	Down	0.783861	0.000329699	Down
Q60972	Rbbp4 Rbap48	Histone-binding protein RBBP4 (Chromatin assembly factor 1 subunit C) (CAF-1 subunit C) (Chromatin assembly factor I p48 subunit) (CAF-I 48 kDa subunit) (CAF-I p48) (Nucleosome-remodeling factor subunit RBAP48) (Retinoblastoma-binding protein 4) (RBBP-4) (Retinoblastoma-binding protein p48)	1.05975	0.00594034	Up	1.073	0.00594034	Up
Q60973	Rbbp7 Rbap46	Histone-binding protein RBBP7 (Histone acetyltransferase type B subunit 2) (Nucleosome-remodeling factor subunit RBAP46) (Retinoblastoma-binding protein 7) (RBBP-7) (Retinoblastoma-binding protein p46)				1.13238	0.010432	Up
Q60996	Ppp2r5c	Serine/threonine-protein phosphatase 2A 56 kDa regulatory subunit gamma isoform (PP2A B subunit isoform B'-alpha-3) (PP2A B subunit isoform B'-gamma) (PP2A B subunit isoform B56-gamma) (PP2A B subunit isoform PR61-gamma) (PP2A B subunit isoform R5-gamma)				1.07473	0.0480407	Up
Q61024	Asns	Asparagine synthetase [glutamine-hydrolyzing] (EC 6.3.5.4) (Glutamine-dependent asparagine synthetase)	0.91916	0.00523851	Down
Q61025	Ift20	Intraflagellar transport protein 20 homolog (mIFT20)	1.17071	0.00109039	Up	1.3111	0.00109039	Up
Q61029	Tmpo Lap2	Lamina-associated polypeptide 2, isoforms beta/delta/epsilon/gamma (Thymopoietin isoforms beta/delta/epsilon/gamma) (TP beta/delta/epsilon/gamma)	1.21251	0.00230979	Up	1.2554	0.00230979	Up
Q61033	Tmpo Lap2	Lamina-associated polypeptide 2, isoforms alpha/zeta (Thymopoietin isoforms alpha/zeta) (TP alpha/zeta)	1.30428	0.000847629	Up	1.34695	0.000847629	Up
Q61035	Hars1 Hars	Histidine--tRNA ligase, cytoplasmic (EC 6.1.1.21) (Histidyl-tRNA synthetase) (HisRS)				0.925952	0.0250191	Down
Q61103	Dpf2 Baf45d Req Ubid4	Zinc finger protein ubi-d4 (Apoptosis response zinc finger protein) (BRG1-associated factor 45D) (BAF45D) (D4, zinc and double PHD fingers family 2) (Protein requiem)	1.06233	0.00450791	Up	1.10835	0.00450791	Up
Q61107	Gbp4 Gbp3	Guanylate-binding protein 4 (EC 3.6.5.-) (GTP-binding protein 3) (GBP-3) (GTP-binding protein 4) (GBP-4) (Guanine nucleotide-binding protein 4) (Guanylate-binding protein 3)	0.817701	0.00095392	Down	0.617977	0.00095392	Down
Q61112	Sdf4 Cab45	45 kDa calcium-binding protein (Cab45) (Stromal cell-derived factor 4) (SDF-4)	1.10948	0.000519517	Up	1.1873	0.000519517	Up
Q61127	Nab2	NGFI-A-binding protein 2 (EGR-1-binding protein 2)	0.839323	0.00333699	Down	1.13212	0.00333699	Up
Q61136	Prpf4b Cbp143 Prp4h Prp4k Prp4m Prpk	Serine/threonine-protein kinase PRP4 homolog (EC 2.7.11.1) (PRP4 pre-mRNA-processing factor 4 homolog) (Pre-mRNA protein kinase)				1.04426	0.000544257	Up
Q61151	Ppp2r5e Kiaa4006	Serine/threonine-protein phosphatase 2A 56 kDa regulatory subunit epsilon isoform (PP2A B subunit isoform B'-epsilon) (PP2A B subunit isoform B56-epsilon) (PP2A B subunit isoform PR61-epsilon) (PP2A B subunit isoform R5-epsilon)				0.768817	0.0483949	Down
Q61160	Fadd Mort1	FAS-associated death domain protein (FAS-associating death domain-containing protein) (Mediator of receptor induced toxicity)	1.10448	0.0278656	Up	1.10881	0.0278656	Up
Q61164	Ctcf	Transcriptional repressor CTCF (11-zinc finger protein) (CCCTC-binding factor) (CTCFL paralog)				1.13674	0.044482	Up
Q61166	Mapre1	Microtubule-associated protein RP/EB family member 1 (APC-binding protein EB1) (End-binding protein 1) (EB1)	0.970705	0.00622174	Down
Q61187	Tsg101	Tumor susceptibility gene 101 protein (ESCRT-I complex subunit TSG101)	1.05228	0.00127213	Up	1.11624	0.00127213	Up
Q61207	Psap Sgp1	Prosaposin (Sulfated glycoprotein 1) (SGP-1) [Cleaved into: Saposin-A; Saposin-B-Val; Saposin-B; Saposin-C; Saposin-D]	1.40368	8.39301e-05	Up	1.16189	8.39301e-05	Up
Q61210	Arhgef1 Lbcl2 Lsc	Rho guanine nucleotide exchange factor 1 (Lbc's second cousin) (Lymphoid blast crisis-like 2)				1.14237	0.0138609	Up
Q61211	Eif2d Lgtn	Eukaryotic translation initiation factor 2D (eIF2D) (Ligatin)	1.23429	0.000463436	Up	1.35931	0.000463436	Up
Q61233	Lcp1 Pls2	Plastin-2 (65 kDa macrophage protein) (L-plastin) (Lymphocyte cytosolic protein 1) (LCP-1) (pp65)	0.975743	0.000713626	Down	0.920261	0.000713626	Down
Q61239	Fnta	Protein farnesyltransferase/geranylgeranyltransferase type-1 subunit alpha (EC 2.5.1.58) (EC 2.5.1.59) (CAAX farnesyltransferase subunit alpha) (FTase-alpha) (Ras proteins prenyltransferase subunit alpha) (Type I protein geranyl-geranyltransferase subunit alpha) (GGTase-I-alpha)	1.08273	0.0205504	Up	1.11756	0.0205504	Up
Q61316	Hspa4 Apg2 Hsp110	Heat shock 70 kDa protein 4 (Heat shock 70-related protein APG-2)	0.957114	0.000826182	Down	0.928548	0.000826182	Down
Q61333	Tnfaip2	Tumor necrosis factor alpha-induced protein 2 (TNF alpha-induced protein 2) (Primary response gene B94 protein)	0.689943	0.000359898	Down
Q61425	Hadh Hadhsc Mschad Schad	Hydroxyacyl-coenzyme A dehydrogenase, mitochondrial (HCDH) (EC 1.1.1.35) (Medium and short-chain L-3-hydroxyacyl-coenzyme A dehydrogenase) (Short-chain 3-hydroxyacyl-CoA dehydrogenase)				0.811767	0.021331	Down
Q61458	Ccnh	Cyclin-H				1.34276	0.0190266	Up
Q61464	Znf638 Np220 Zfml Zfp638	Zinc finger protein 638 (Nuclear protein 220) (Zinc finger matrin-like protein)				1.15384	0.0342913	Up
Q61490	Alcam	CD166 antigen (Activated leukocyte cell adhesion molecule) (BEN) (Protein DM-GRASP) (CD antigen CD166)				0.6421	0.000420721	Down
Q61543	Glg1 Esl1 Mg160 Selel	Golgi apparatus protein 1 (E-selectin ligand 1) (ESL-1) (Selel) (Golgi sialoglycoprotein MG-160)	1.44319	0.0167027	Up	1.37886	0.0167027	Up
Q61578	Fdxr	NADPH:adrenodoxin oxidoreductase, mitochondrial (AR) (Adrenodoxin reductase) (EC 1.18.1.6) (Ferredoxin--NADP(+) reductase) (Ferredoxin reductase)				0.79055	0.0034894	Down
Q61584	Fxr1 Fxr1h	Fragile X mental retardation syndrome-related protein 1 (mFxr1p)				1.23472	0.000135805	Up
Q61598	Gdi2 Gdi3	Rab GDP dissociation inhibitor beta (Rab GDI beta) (GDI-3) (Guanosine diphosphate dissociation inhibitor 2) (GDI-2)	1.10081	0.0341194	Up	1.09444	0.0341194	Up
Q61655	Ddx19a Ddx19 Eif4a-rs1	ATP-dependent RNA helicase DDX19A (EC 3.6.4.13) (DEAD box RNA helicase DEAD5) (mDEAD5) (DEAD box protein 19A) (Eukaryotic translation initiation factor 4A-related sequence 1)				1.07968	0.0385978	Up
Q61656	Ddx5 Tnz2	Probable ATP-dependent RNA helicase DDX5 (EC 3.6.4.13) (DEAD box RNA helicase DEAD1) (mDEAD1) (DEAD box protein 5) (RNA helicase p68)	0.813929	0.00011227	Down	1.12394	0.00011227	Up
Q61686	Cbx5 Hp1a	Chromobox protein homolog 5 (Heterochromatin protein 1 homolog alpha) (HP1 alpha)	1.1666	4.24056e-05	Up	1.17493	4.24056e-05	Up
Q61699	Hsph1 Hsp105 Hsp110 Kiaa0201	Heat shock protein 105 kDa (42 degrees C-HSP) (Heat shock 110 kDa protein) (Heat shock-related 100 kDa protein E7I) (HSP-E7I)	0.939809	0.00133983	Down	0.833639	0.00133983	Down
Q61733	Mrps31 Imogn38	28S ribosomal protein S31, mitochondrial (MRP-S31) (S31mt) (Imogen 38)	0.836161	0.0097189	Down	0.736502	0.0097189	Down
Q61753	Phgdh	D-3-phosphoglycerate dehydrogenase (3-PGDH) (EC 1.1.1.95) (A10)				1.12091	0.00252518	Up
Q61768	Kif5b Khcs Kns1	Kinesin-1 heavy chain (Conventional kinesin heavy chain) (Ubiquitous kinesin heavy chain) (UKHC)	0.915875	0.0278864	Down	0.927926	0.0278864	Down
Q61792	Lasp1 Mln50	LIM and SH3 domain protein 1 (LASP-1) (Metastatic lymph node gene 50 protein) (MLN 50)	0.942714	0.000173503	Down	0.789464	0.000173503	Down
Q61881	Mcm7 Cdc47 Mcmd7	DNA replication licensing factor MCM7 (EC 3.6.4.12) (CDC47 homolog)	1.14102	2.36094e-05	Up	1.35486	2.36094e-05	Up
Q61990	Pcbp2 Cbp Hnrnpx Hnrpx	Poly(rC)-binding protein 2 (Alpha-CP2) (CTBP) (CBP) (Putative heterogeneous nuclear ribonucleoprotein X) (hnRNP X)	0.920996	0.00817195	Down
Q62018	Ctr9 Kiaa0155 Sh2bp1	RNA polymerase-associated protein CTR9 homolog (SH2 domain-binding protein 1) (Tetratricopeptide repeat-containing, SH2-binding phosphoprotein of 150 kDa) (TPR-containing, SH2-binding phosphoprotein of 150 kDa) (p150TSP)	1.05765	0.000757304	Up	1.19329	0.000757304	Up
Q62048	Pea15 Pea15a	Astrocytic phosphoprotein PEA-15 (15 kDa phosphoprotein enriched in astrocytes)				0.863272	0.0147061	Down
Q62159	Rhoc Arhc	Rho-related GTP-binding protein RhoC (Silica-induced gene 61 protein) (SIG-61)	0.785944	3.62354e-05	Down	0.716592	3.62354e-05	Down
Q62167	Ddx3x D1Pas1-rs2 Ddx3 Dead3 Erh	ATP-dependent RNA helicase DDX3X (EC 3.6.4.13) (D1Pas1-related sequence 2) (DEAD box RNA helicase DEAD3) (mDEAD3) (DEAD box protein 3, X-chromosomal) (Embryonic RNA helicase)	0.855729	0.00524283	Down	1.12691	0.00524283	Up
Q62189	Snrpa Rnu1a-1	U1 small nuclear ribonucleoprotein A (U1 snRNP A) (U1-A) (U1A)				1.16395	0.00667463	Up
Q62191	Trim21 Ro52 Ssa1	E3 ubiquitin-protein ligase TRIM21 (EC 2.3.2.27) (52 kDa Ro protein) (52 kDa ribonucleoprotein autoantigen Ro/SS-A) (RING-type E3 ubiquitin transferase TRIM21) (Ro(SS-A)) (Sjoegren syndrome type A antigen) (SS-A) (Tripartite motif-containing protein 21)	0.746007	2.34895e-05	Down	0.61451	2.34895e-05	Down
Q62241	Snrpc Snrp1c	U1 small nuclear ribonucleoprotein C (U1 snRNP C) (U1-C) (U1C)				0.817182	0.00153217	Down
Q62261	Sptbn1 Elf Spnb-2 Spnb2 Sptb2	Spectrin beta chain, non-erythrocytic 1 (Beta-II spectrin) (Embryonic liver fodrin) (Fodrin beta chain)	1.1112	0.00950394	Up
Q62318	Trim28 Kap1 Krip1 Tif1b	Transcription intermediary factor 1-beta (TIF1-beta) (E3 SUMO-protein ligase TRIM28) (EC 2.3.2.27) (KRAB-A-interacting protein) (KRIP-1) (RING-type E3 ubiquitin transferase TIF1-beta) (Tripartite motif-containing protein 28)	1.06515	5.10409e-05	Up	1.23975	5.10409e-05	Up
Q62376	Snrnp70 Snrp70	U1 small nuclear ribonucleoprotein 70 kDa (U1 snRNP 70 kDa) (U1-70K) (snRNP70)	0.897756	0.000458213	Down	0.803826	0.000458213	Down
Q62388	Atm	Serine-protein kinase ATM (EC 2.7.11.1) (Ataxia telangiectasia mutated homolog) (A-T mutated homolog)	1.28159	0.00387627	Up	1.39443	0.00387627	Up
Q62393	Tpd52	Tumor protein D52 (mD52)	0.970194	0.00178409	Down	0.919658	0.00178409	Down
Q62418	Dbnl Abp1 Sh3p7	Drebrin-like protein (Actin-binding protein 1) (SH3 domain-containing protein 7)	1.0475	0.0089561	Up	1.0465	0.0089561	Up
Q62433	Ndrg1 Ndr1 Ndrl Tdd5	Protein NDRG1 (N-myc downstream-regulated gene 1 protein) (Protein Ndr1)	1.24352	0.000687626	Up	1.26876	0.000687626	Up
Q62446	Fkbp3 Fkbp25	Peptidyl-prolyl cis-trans isomerase FKBP3 (PPIase FKBP3) (EC 5.2.1.8) (25 kDa FK506-binding protein) (25 kDa FKBP) (FKBP-25) (FK506-binding protein 3) (FKBP-3) (Immunophilin FKBP25) (Rapamycin-selective 25 kDa immunophilin) (Rotamase)	1.11193	0.000942305	Up	1.14701	0.000942305	Up
Q62448	Eif4g2 Nat1	Eukaryotic translation initiation factor 4 gamma 2 (eIF-4-gamma 2) (eIF-4G 2) (eIF4G 2) (Novel APOBEC-1 target 1) (Translation repressor NAT1) (p97)	0.860097	0.0101717	Down
Q63829	Commd3 Bup	COMM domain-containing protein 3 (Bmi-1 upstream gene protein) (Bup protein)	1.05879	0.000170409	Up	1.25779	0.000170409	Up
Q63844	Mapk3 Erk1 Prkm3	Mitogen-activated protein kinase 3 (MAP kinase 3) (MAPK 3) (EC 2.7.11.24) (ERT2) (Extracellular signal-regulated kinase 1) (ERK-1) (Insulin-stimulated MAP2 kinase) (MAP kinase isoform p44) (p44-MAPK) (MNK1) (Microtubule-associated protein 2 kinase) (p44-ERK1)	1.12865	0.0185243	Up	1.16635	0.0185243	Up
Q63932	Map2k2 Mek2 Mkk2 Prkmk2	Dual specificity mitogen-activated protein kinase kinase 2 (MAP kinase kinase 2) (MAPKK 2) (EC 2.7.12.2) (ERK activator kinase 2) (MAPK/ERK kinase 2) (MEK 2)				1.20607	0.0369852	Up
Q640M1	Utp14a JsdX Kiaa0266	U3 small nucleolar RNA-associated protein 14 homolog A (Juvenile spermatogonial depletion-like X-linked protein) (Jsd-like X-linked protein)				1.17533	0.00452133	Up
Q64112	Ifit2 Garg39 Ifi54 Isg54	Interferon-induced protein with tetratricopeptide repeats 2 (IFIT-2) (Glucocorticoid-attenuated response gene 39 protein) (GARG-39) (Interferon-induced 54 kDa protein) (IFI-54K) (P54)	0.924147	0.000656719	Down	0.748604	0.000656719	Down
Q641K1	Agtpbp1 Ccp1 Nna1	Cytosolic carboxypeptidase 1 (EC 3.4.17.-) (ATP/GTP-binding protein 1) (Nervous system nuclear protein induced by axotomy protein 1)	1.23261	0.00722268	Up	1.32594	0.00722268	Up
Q64261	Cdk6 Cdkn6 Crk2	Cyclin-dependent kinase 6 (EC 2.7.11.22) (CR2 protein kinase) (CRK2) (Cell division protein kinase 6) (Serine/threonine-protein kinase PLSTIRE)	0.848358	1.32813e-05	Down	1.19727	1.32813e-05	Up
Q64281	Lilrb4 Gp49b	Leukocyte immunoglobulin-like receptor subfamily B member 4 (Mast cell surface glycoprotein Gp49B) (CD antigen CD85k)				0.682444	0.0461634	Down
Q64282	Ifit1 Garg16 Ifi56 Isg56	Interferon-induced protein with tetratricopeptide repeats 1 (IFIT-1) (Glucocorticoid-attenuated response gene 16 protein) (GARG-16) (Interferon-induced 56 kDa protein) (IFI-56K) (P56)	0.781584	2.28885e-05	Down	0.611775	2.28885e-05	Down
Q64337	Sqstm1 A170 STAP	Sequestosome-1 (STONE14) (Ubiquitin-binding protein p62)	0.840568	3.36764e-05	Down	0.673213	3.36764e-05	Down
Q64339	Isg15 G1p2 Ucrp	Ubiquitin-like protein ISG15 (Interferon-induced 15 kDa protein) (Interferon-induced 17 kDa protein) (IP17) (Ubiquitin cross-reactive protein)	0.766909	1.33098e-05	Down	0.609888	1.33098e-05	Down
Q64345	Ifit3 Garg49 Ifi49 Isg49	Interferon-induced protein with tetratricopeptide repeats 3 (IFIT-3) (Glucocorticoid-attenuated response gene 49 protein) (GARG-49) (P49) (IRG2)	0.875082	2.19787e-06	Down	0.576814	2.19787e-06	Down
Q64433	Hspe1	10 kDa heat shock protein, mitochondrial (Hsp10) (10 kDa chaperonin) (Chaperonin 10) (CPN10)	0.925031	2.19787e-06	Down	0.634231	2.19787e-06	Down
Q64511	Top2b	DNA topoisomerase 2-beta (EC 5.6.2.2) (DNA topoisomerase II, beta isozyme)	1.14524	8.30726e-05	Up	0.754445	8.30726e-05	Down
Q64516	Gk Gyk	Glycerol kinase (GK) (Glycerokinase) (EC 2.7.1.30) (ATP:glycerol 3-phosphotransferase)	0.927865	4.9398e-05	Down	0.610242	4.9398e-05	Down
Q64674	Srm	Spermidine synthase (SPDSY) (EC 2.5.1.16) (Putrescine aminopropyltransferase)	1.06585	0.0195205	Up	1.08705	0.0195205	Up
Q64701	Rbl1	Retinoblastoma-like protein 1 (107 kDa retinoblastoma-associated protein) (p107) (pRb1)	1.2417	0.00865631	Up	1.45239	0.00865631	Up
Q64737	Gart	Trifunctional purine biosynthetic protein adenosine-3 [Includes: Phosphoribosylamine--glycine ligase (EC 6.3.4.13) (Glycinamide ribonucleotide synthetase) (GARS) (Phosphoribosylglycinamide synthetase); Phosphoribosylformylglycinamidine cyclo-ligase (EC 6.3.3.1) (AIR synthase) (AIRS) (Phosphoribosyl-aminoimidazole synthetase); Phosphoribosylglycinamide formyltransferase (EC 2.1.2.2) (5'-phosphorib…				1.097	0.0145663	Up
Q65Z40	Wapl Kiaa0261 Wapal	Wings apart-like protein homolog (Dioxin-inducible factor 2) (DIF-2) (WAPL cohesin release factor)				1.17012	0.00178996	Up
Q689Z5	Sbno1 Sno1	Protein strawberry notch homolog 1 (mSno1)				1.20616	0.00729312	Up
Q68FD5	Cltc	Clathrin heavy chain 1				0.877666	0.000411854	Down
Q68FF6	Git1	ARF GTPase-activating protein GIT1 (ARF GAP GIT1) (G protein-coupled receptor kinase-interactor 1) (GRK-interacting protein 1)				1.37401	0.0279954	Up
Q68FH4	Galk2	N-acetylgalactosamine kinase (EC 2.7.1.157) (GalNAc kinase) (Galactokinase 2)	1.20942	0.00774091	Up	1.3132	0.00774091	Up
Q68FL6	Mars1 Mars	Methionine--tRNA ligase, cytoplasmic (EC 6.1.1.10) (Methionyl-tRNA synthetase) (MetRS)	1.14398	0.00925982	Up	1.19388	0.00925982	Up
Q69Z37	Samd9l Kiaa2005	Sterile alpha motif domain-containing protein 9-like (SAM domain-containing protein 9-like)	0.845882	0.000475775	Down	0.69274	0.000475775	Down
Q69Z38	Peak1 Kiaa2002 Sgk269	Inactive tyrosine-protein kinase PEAK1 (Pseudopodium-enriched atypical kinase 1) (Sugen kinase 269) (Tyrosine-protein kinase SgK269)	0.864228	1.54947e-05	Down	0.830015	1.54947e-05	Down
Q69ZK0	Prex1 Kiaa1415	Phosphatidylinositol 3,4,5-trisphosphate-dependent Rac exchanger 1 protein (P-Rex1) (PtdIns(3,4,5)-dependent Rac exchanger 1)	1.33566	0.0112946	Up	1.34016	0.0112946	Up
Q69ZK6	Jmjd1c Jhdm2c Kiaa1380	Probable JmjC domain-containing histone demethylation protein 2C (EC 1.14.11.-) (Jumonji domain-containing protein 1C)	0.895538	0.0128445	Down
Q69ZN7	Myof Fer1l3 Kiaa1207	Myoferlin (Fer-1-like protein 3)				0.791275	4.08126e-05	Down
Q69ZR2	Hectd1 Kiaa1131 Opm	E3 ubiquitin-protein ligase HECTD1 (EC 2.3.2.26) (HECT domain-containing protein 1) (HECT-type E3 ubiquitin transferase HECTD1) (Protein open mind)	0.783962	0.00251304	Down	0.810054	0.00251304	Down
Q6A009	Ltn1 Kiaa0714 Lister Rnf160 Zfp294 Znf294	E3 ubiquitin-protein ligase listerin (EC 2.3.2.27) (RING finger protein 160) (RING-type E3 ubiquitin transferase listerin) (Zinc finger protein 294) (Zfp-294)				1.15199	0.0315451	Up
Q6A026	Pds5a Kiaa0648	Sister chromatid cohesion protein PDS5 homolog A				1.23032	0.00194984	Up
Q6A028	Swap70 Kiaa0640	Switch-associated protein 70 (SWAP-70)	0.874247	0.000521669	Down
Q6DFW4	Nop58 Nol5	Nucleolar protein 58 (MSSP) (Nucleolar protein 5) (SIK-similar protein)	1.10173	0.00229469	Up	1.21911	0.00229469	Up
Q6DG52	Churc1	Protein Churchill	0.883921	0.0170711	Down	0.896736	0.0170711	Down
Q6IRU2	Tpm4	Tropomyosin alpha-4 chain (Tropomyosin-4)	0.901734	5.92432e-05	Down	0.780268	5.92432e-05	Down
Q6KAR6	Exoc3 Sec6l1	Exocyst complex component 3 (Exocyst complex component Sec6)	1.26571	2.14872e-05	Up	1.53602	2.14872e-05	Up
Q6NS46	Pdcd11 Alg4 Kiaa0185	Protein RRP5 homolog (Apoptosis-linked gene 4 protein) (Programmed cell death protein 11)				1.18944	0.00119952	Up
Q6NSQ7	Ltv1	Protein LTV1 homolog	1.17346	9.29633e-05	Up	1.44243	9.29633e-05	Up
Q6NV83	U2surp Sr140	U2 snRNP-associated SURP motif-containing protein (140 kDa Ser/Arg-rich domain protein) (U2-associated protein SR140)				1.14155	0.00816678	Up
Q6NVF9	Cpsf6	Cleavage and polyadenylation specificity factor subunit 6	1.03242	0.040073	Up
Q6NZB0	Dnajc8	DnaJ homolog subfamily C member 8				1.12923	0.0169805	Up
Q6NZF1	Zc3h11a Kiaa0663	Zinc finger CCCH domain-containing protein 11A	0.854718	0.0130429	Down
Q6NZJ6	Eif4g1	Eukaryotic translation initiation factor 4 gamma 1 (eIF-4-gamma 1) (eIF-4G 1) (eIF-4G1)	0.925992	0.000203565	Down	0.960097	0.000203565	Down
Q6P1B1	Xpnpep1	Xaa-Pro aminopeptidase 1 (EC 3.4.11.9) (Aminoacylproline aminopeptidase) (Cytosolic aminopeptidase P) (Soluble aminopeptidase P) (sAmp) (X-Pro aminopeptidase 1) (X-prolyl aminopeptidase 1, soluble)	1.04483	0.00179276	Up	0.948069	0.00179276	Down
Q6P1E1	Zmiz1 Rai17 Zimp10	Zinc finger MIZ domain-containing protein 1 (PIAS-like protein Zimp10) (Retinoic acid-induced protein 17)	1.24795	0.00852008	Up	1.34855	0.00852008	Up
Q6P2B1	Tnpo3	Transportin-3				1.24272	0.0102499	Up
Q6P3A8	Bckdhb	2-oxoisovalerate dehydrogenase subunit beta, mitochondrial (EC 1.2.4.4) (Branched-chain alpha-keto acid dehydrogenase E1 component beta chain) (BCKDE1B) (BCKDH E1-beta)				0.829713	0.0145174	Down
Q6P3A9	Arl11	ADP-ribosylation factor-like protein 11	1.06444	0.0355412	Up
Q6P3D0	Nudt16	U8 snoRNA-decapping enzyme (EC 3.6.1.62) (IDP phosphatase) (IDPase) (EC 3.6.1.64) (Inosine diphosphate phosphatase) (Nucleoside diphosphate-linked moiety X motif 16) (Nudix motif 16) (m7GpppN-mRNA hydrolase)	1.07419	0.00723987	Up	1.05035	0.00723987	Up
Q6P4S6	Sik3 Kiaa0999 Qsk	Serine/threonine-protein kinase SIK3 (EC 2.7.11.1) (Salt-inducible kinase 3) (SIK-3) (Serine/threonine-protein kinase QSK)	0.76887	0.000357111	Down	0.837036	0.000357111	Down
Q6P4T2	Snrnp200 Kiaa0788	U5 small nuclear ribonucleoprotein 200 kDa helicase (EC 3.6.4.13) (BRR2 homolog) (U5 snRNP-specific 200 kDa protein) (U5-200KD)				1.07605	0.0230495	Up
Q6P542	Abcf1	ATP-binding cassette sub-family F member 1				1.04534	0.0466326	Up
Q6P549	Inppl1 Ship2	Phosphatidylinositol 3,4,5-trisphosphate 5-phosphatase 2 (EC 3.1.3.86) (AblSH3-binding protein) (Inositol polyphosphate phosphatase-like protein 1) (INPPL-1) (SH2 domain-containing inositol 5'-phosphatase 2) (SH2 domain-containing inositol phosphatase 2) (SHIP-2)	0.87686	0.00296479	Down	0.950443	0.00296479	Down
Q6P5D8	Smchd1 Kiaa0650	Structural maintenance of chromosomes flexible hinge domain-containing protein 1 (SMC hinge domain-containing protein 1) (EC 3.6.1.-)				1.13726	0.00301678	Up
Q6P5E4	Uggt1 Gt Ugcgl1 Uggt Ugt1 Ugtr	UDP-glucose:glycoprotein glucosyltransferase 1 (UGT1) (EC 2.4.1.-) (UDP--Glc:glycoprotein glucosyltransferase) (UDP-glucose ceramide glucosyltransferase-like 1)				0.956002	0.0070977	Down
Q6P5E6	Gga2 Kiaa1080	ADP-ribosylation factor-binding protein GGA2 (Gamma-adaptin-related protein 2) (Golgi-localized, gamma ear-containing, ARF-binding protein 2)				1.46849	0.00566623	Up
Q6P5F9	Xpo1 Crm1	Exportin-1 (Exp1) (Chromosome region maintenance 1 protein homolog)	1.08051	0.00176554	Up	1.18475	0.00176554	Up
Q6P6J4	Alkbh2 Abh2	DNA oxidative demethylase ALKBH2 (EC 1.14.11.33) (Alkylated DNA repair protein alkB homolog 2) (Alpha-ketoglutarate-dependent dioxygenase alkB homolog 2)	1.06959	0.000912096	Up	1.14766	0.000912096	Up
Q6P9L6	Kif15 Klp2 Knsl7	Kinesin-like protein KIF15 (Kinesin-like protein 2) (Kinesin-like protein 7)	1.13088	1.76097e-05	Up	1.33705	1.76097e-05	Up
Q6P9P6	Kif11	Kinesin-like protein KIF11 (Kinesin-related motor protein Eg5)	1.35287	0.000647688	Up	1.5285	0.000647688	Up
Q6P9Q6	Fkbp15 Fkbp133 Kiaa0674	FK506-binding protein 15 (FKBP-15) (133 kDa FK506-binding protein) (133 kDa FKBP) (FKBP-133) (WASP and FKBP-like) (WAFL)				1.15297	0.00319627	Up
Q6PAR5	Gapvd1 Gapex5 Kiaa1521	GTPase-activating protein and VPS9 domain-containing protein 1 (GAPex-5) (Rab5-activating protein 6)	0.934672	0.0428002	Down
Q6PAV2	Herc4	Probable E3 ubiquitin-protein ligase HERC4 (EC 2.3.2.26) (HECT domain and RCC1-like domain-containing protein 4) (HECT-type E3 ubiquitin transferase HERC4)				1.17056	0.00158373	Up
Q6PB44	Ptpn23 Kiaa1471	Tyrosine-protein phosphatase non-receptor type 23 (EC 3.1.3.48)	0.899804	0.00623448	Down
Q6PB66	Lrpprc Lrp130	Leucine-rich PPR motif-containing protein, mitochondrial (130 kDa leucine-rich protein) (LRP 130) (mLRP130)	0.888958	1.95201e-05	Down	0.810479	1.95201e-05	Down
Q6PCM1	Kdm3a Jhdm2a Jmjd1a Kiaa0742	Lysine-specific demethylase 3A (EC 1.14.11.65) (JmjC domain-containing histone demethylation protein 2A) (Jumonji domain-containing protein 1A) ([histone H3]-dimethyl-L-lysine(9) demethylase 3A)	1.14159	0.00101402	Up	1.25329	0.00101402	Up
Q6PCN7	Hltf Smarca3 Snf2l3 Zbu1	Helicase-like transcription factor (EC 2.3.2.27) (EC 3.6.4.-) (P113) (RING-type E3 ubiquitin transferase HLTF) (SWI/SNF-related matrix-associated actin-dependent regulator of chromatin subfamily A member 3) (Sucrose nonfermenting protein 2-like 3) (TNF-response element-binding protein)	1.19092	0.000993013	Up	1.33347	0.000993013	Up
Q6PD03	Ppp2r5a	Serine/threonine-protein phosphatase 2A 56 kDa regulatory subunit alpha isoform (PP2A B subunit isoform B'-alpha) (PP2A B subunit isoform B56-alpha) (PP2A B subunit isoform PR61-alpha) (PR61alpha) (PP2A B subunit isoform R5-alpha)	0.807267	5.27387e-05	Down	0.709194	5.27387e-05	Down
Q6PDI5	Ecpas Ecm29 Kiaa0368	Proteasome adapter and scaffold protein ECM29 (Proteasome-associated protein ECM29 homolog)				1.1514	0.00124528	Up
Q6PDL0	Dync1li2 Dncli2 Dnclic2	Cytoplasmic dynein 1 light intermediate chain 2 (Dynein light intermediate chain 2, cytosolic)	0.918574	0.00939308	Down	0.856401	0.00939308	Down
Q6PDM2	Srsf1 Sfrs1	Serine/arginine-rich splicing factor 1 (ASF/SF2) (Pre-mRNA-splicing factor SRp30a) (Splicing factor, arginine/serine-rich 1)	0.876413	0.00149735	Down	0.824203	0.00149735	Down
Q6PDQ2	Chd4	Chromodomain-helicase-DNA-binding protein 4 (CHD-4) (EC 3.6.4.12)	1.0888	0.000214098	Up	1.20666	0.000214098	Up
Q6PE01	Snrnp40 Wdr57	U5 small nuclear ribonucleoprotein 40 kDa protein (U5 snRNP 40 kDa protein) (WD repeat-containing protein 57)				1.1075	0.0307634	Up
Q6PE15	Abhd10	Palmitoyl-protein thioesterase ABHD10, mitochondrial (EC 3.1.2.22) (Acyl-protein thioesterase ABHD10) (Alpha/beta hydrolase domain-containing protein 10) (Abhydrolase domain-containing protein 10) (Mycophenolic acid acyl-glucuronide esterase, mitochondrial) (EC 3.1.1.93)	0.863095	0.00150786	Down	0.610093	0.00150786	Down
Q6PFD9	Nup98	Nuclear pore complex protein Nup98-Nup96 (EC 3.4.21.-) [Cleaved into: Nuclear pore complex protein Nup98 (98 kDa nucleoporin) (Nucleoporin Nup98) (Nup98); Nuclear pore complex protein Nup96 (96 kDa nucleoporin) (Nucleoporin Nup96) (Nup96)]				1.1328	0.00429411	Up
Q6PGC1	Dhx29	ATP-dependent RNA helicase DHX29 (EC 3.6.4.13) (DEAH box protein 29)				1.17596	0.0160882	Up
Q6PGG2	Gmip	GEM-interacting protein (GMIP)				1.31317	0.0063001	Up
Q6PGH1	Bud31	Protein BUD31 homolog (Protein G10 homolog)				1.25731	0.0304281	Up
Q6PGL7	Washc2 D6Wsu116e Fam21 Kiaa0592	WASH complex subunit 2	1.11895	0.000118195	Up	1.07579	0.000118195	Up
Q6PHZ2	Camk2d Kiaa4163	Calcium/calmodulin-dependent protein kinase type II subunit delta (CaM kinase II subunit delta) (CaMK-II subunit delta) (EC 2.7.11.17)	0.84919	0.0105561	Down	0.801608	0.0105561	Down
Q6PR54	Rif1	Telomere-associated protein RIF1 (Rap1-interacting factor 1 homolog) (mRif1)	1.1414	0.000306528	Up	1.28187	0.000306528	Up
Q6Q899	Ddx58	Antiviral innate immune response receptor RIG-I (DEAD box protein 58) (Probable ATP-dependent RNA helicase DDX58) (EC 3.6.4.13) (RIG-I-like receptor 1) (RLR-1) (Retinoic acid-inducible gene 1 protein) (RIG-1) (Retinoic acid-inducible gene I protein) (RIG-I)	0.80771	3.23543e-05	Down	0.652567	3.23543e-05	Down
Q6SKR2	N6amt1 Hemk2 Kmt9 Pred28	Methyltransferase N6AMT1 (HemK methyltransferase family member 2) (Lysine N-methyltransferase 9) (EC 2.1.1.-) (Methylarsonite methyltransferase N6AMT1) (EC 2.1.1.-) (Protein N(5)-glutamine methyltransferase) (EC 2.1.1.-)	1.10823	0.0242683	Up	1.10802	0.0242683	Up
Q6WVG3	Kctd12 Pfet1	BTB/POZ domain-containing protein KCTD12 (Pfetin) (Predominantly fetal expressed T1 domain)	0.904094	4.40241e-05	Down	0.611689	4.40241e-05	Down
Q6Y7W8	Gigyf2 Kiaa0642 Perq2 Tnrc15	GRB10-interacting GYF protein 2 (PERQ amino acid-rich with GYF domain-containing protein 2) (Trinucleotide repeat-containing gene 15 protein)	0.866452	0.0467061	Down
Q6ZPL9	Ddx55 Kiaa1595	ATP-dependent RNA helicase DDX55 (EC 3.6.4.13) (DEAD box protein 55)				1.08823	0.0141005	Up
Q6ZPU9	Kifbp Kbp Kiaa1279 Kif1bp	KIF-binding protein (KIF1-binding protein)				1.17228	0.00920023	Up
Q6ZPY2	Smg5 Est1b Kiaa1089	Protein SMG5 (EST1-like protein B) (SMG-5 homolog)				1.22153	0.00325748	Up
Q6ZPY7	Kdm3b Jhdm2b Jmjd1b Kiaa1082	Lysine-specific demethylase 3B (EC 1.14.11.65) (JmjC domain-containing histone demethylation protein 2B) (Jumonji domain-containing protein 1B) ([histone H3]-dimethyl-L-lysine(9) demethylase 3B)	1.11734	0.000270359	Up	1.23955	0.000270359	Up
Q6ZQ08	Cnot1 Kiaa1007	CCR4-NOT transcription complex subunit 1 (CCR4-associated factor 1)				1.25051	0.000103791	Up
Q6ZQ58	Larp1 Kiaa0731 Larp	La-related protein 1 (La ribonucleoprotein domain family member 1)	0.847494	0.00247345	Down
Q6ZQ93	Usp34 Kiaa0570 Murr2	Ubiquitin carboxyl-terminal hydrolase 34 (EC 3.4.19.12) (Deubiquitinating enzyme 34) (Ubiquitin thioesterase 34) (Ubiquitin-specific-processing protease 34)				1.51499	0.00253112	Up
Q6ZQF0	Topbp1 Kiaa0259	DNA topoisomerase 2-binding protein 1 (DNA topoisomerase II-beta-binding protein 1) (TopBP1) (DNA topoisomerase II-binding protein 1)	1.51676	0.000349714	Up	1.66607	0.000349714	Up
Q6ZQJ5	Dna2 Dna2l Kiaa0083	DNA replication ATP-dependent helicase/nuclease DNA2 (DNA replication ATP-dependent helicase-like homolog) [Includes: DNA replication nuclease DNA2 (EC 3.1.-.-); DNA replication ATP-dependent helicase DNA2 (EC 3.6.4.12)]	1.18628	2.93377e-05	Up	1.37379	2.93377e-05	Up
Q6ZWV3	Rpl10 Qm	60S ribosomal protein L10 (Protein QM homolog) (Ribosomal protein L10)	0.933512	0.0089561	Down
Q6ZWY3	Rps27l	40S ribosomal protein S27-like	1.06432	0.000519517	Up	1.21062	0.000519517	Up
Q70FJ1	Akap9 Kiaa0803	A-kinase anchor protein 9 (AKAP-9) (Protein kinase A-anchoring protein 9) (PRKA9)	1.14688	1.89808e-05	Up	1.40279	1.89808e-05	Up
Q78PG9	Ccdc25	Coiled-coil domain-containing protein 25	0.818406	0.00838223	Down	0.755576	0.00838223	Down
Q78PY7	Snd1	Staphylococcal nuclease domain-containing protein 1 (EC 3.1.31.1) (100 kDa coactivator) (p100 co-activator)	1.14033	0.000126849	Up	1.29696	0.000126849	Up
Q78WZ7	Polr1f Twistnb	DNA-directed RNA polymerase I subunit RPA43 (DNA-directed RNA polymerase I subunit F) (Twist neighbor protein)				1.11563	0.00817828	Up
Q78ZA7	Nap1l4	Nucleosome assembly protein 1-like 4				1.08541	0.0403585	Up
Q7TMC8	Fcsk Fuk	L-fucose kinase (Fucokinase) (EC 2.7.1.52)	1.30888	0.00729312	Up	1.40357	0.00729312	Up
Q7TMX5	Shq1	Protein SHQ1 homolog				1.11849	0.0405158	Up
Q7TMY7	Ipo8	Importin-8 (Imp8) (Ran-binding protein 8) (RanBP8)	1.32499	0.0070726	Up	1.24541	0.0070726	Up
Q7TMY8	Huwe1 Kiaa0312 Ureb1	E3 ubiquitin-protein ligase HUWE1 (EC 2.3.2.26) (E3Histone) (HECT, UBA and WWE domain-containing protein 1) (HECT-type E3 ubiquitin transferase HUWE1) (Upstream regulatory element-binding protein 1) (URE-B1) (URE-binding protein 1)				1.14754	0.00632005	Up
Q7TNC4	Luc7l2	Putative RNA-binding protein Luc7-like 2 (CGI-74 homolog)				1.09352	0.00833481	Up
Q7TNE3	Spag7	Sperm-associated antigen 7				1.48428	0.0145982	Up
Q7TNG5	Eml2	Echinoderm microtubule-associated protein-like 2 (EMAP-2)				0.897858	0.0118882	Down
Q7TNV0	Dek	Protein DEK	1.15274	0.00170559	Up	1.05969	0.00170559	Up
Q7TPD0	Ints3	Integrator complex subunit 3 (Int3) (SOSS complex subunit A) (Sensor of single-strand DNA complex subunit A) (SOSS-A) (Sensor of ssDNA subunit A)				1.33256	0.0449592	Up
Q7TPH6	Mycbp2 Pam Phr1	E3 ubiquitin-protein ligase MYCBP2 (EC 2.3.2.33) (Myc-binding protein 2) (Pam/highwire/rpm-1 protein) (Protein Magellan) (Protein associated with Myc)	1.32949	0.000456557	Up	1.39782	0.000456557	Up
Q7TPR4	Actn1	Alpha-actinin-1 (Alpha-actinin cytoskeletal isoform) (F-actin cross-linking protein) (Non-muscle alpha-actinin-1)				0.71663	1.95201e-05	Down
Q7TPS5	C2cd5 Cdp138 Kiaa0528	C2 domain-containing protein 5 (138 kDa C2 domain-containing phosphoprotein)	1.32005	0.00194413	Up	1.43286	0.00194413	Up
Q7TPV4	Mybbp1a P160	Myb-binding protein 1A (Myb-binding protein of 160 kDa)				1.13667	0.00130361	Up
Q7TQC5	Aptx	Aprataxin (EC 3.6.1.71) (EC 3.6.1.72) (Forkhead-associated domain histidine triad-like protein) (FHA-HIT)				1.53042	0.000544257	Up
Q7TQI3	Otub1	Ubiquitin thioesterase OTUB1 (EC 3.4.19.12) (Deubiquitinating enzyme OTUB1) (OTU domain-containing ubiquitin aldehyde-binding protein 1) (Otubain-1) (Ubiquitin-specific-processing protease OTUB1)	1.07313	0.00938526	Up	1.07736	0.00938526	Up
Q7TQK1	Ints7	Integrator complex subunit 7 (Int7)				1.37052	0.0204745	Up
Q7TQK4	Exosc3 Rrp40	Exosome complex component RRP40 (EC 3.1.13.-) (Exosome component 3) (Ribosomal RNA-processing protein 40)	1.03824	0.000130988	Up	1.14279	0.000130988	Up
Q7TSE6	Stk38l Ndr2	Serine/threonine-protein kinase 38-like (EC 2.7.11.1) (NDR2 protein kinase) (Nuclear Dbf2-related kinase 2)	1.19274	0.000720702	Up	1.47093	0.000720702	Up
Q7TSG2	Ctdp1 Fcp1	RNA polymerase II subunit A C-terminal domain phosphatase (EC 3.1.3.16) (TFIIF-associating CTD phosphatase)				1.1114	0.00748385	Up
Q7TSH2	Phkb	Phosphorylase b kinase regulatory subunit beta (Phosphorylase kinase subunit beta)	1.25634	0.00133983	Up	1.42416	0.00133983	Up
Q7TSH6	Scaf4 Kiaa1172 Srsf15	SR-related and CTD-associated factor 4 (CTD-binding SR-like protein RA4) (Splicing factor, arginine/serine-rich 15)	0.90592	0.00352059	Down	0.892056	0.00352059	Down
Q7TSS2	Ube2q1 Ube2q	Ubiquitin-conjugating enzyme E2 Q1 (EC 2.3.2.23) (E2 ubiquitin-conjugating enzyme Q1) (Galactosyl transferase-associated protein) (GTAP) (Ubiquitin carrier protein Q1) (Ubiquitin-protein ligase Q1)	0.883392	0.00131847	Down	0.928048	0.00131847	Down
Q7TSV4	Pgm2 Pgm1	Phosphoglucomutase-2 (PGM 2) (EC 5.4.2.2) (Glucose phosphomutase 2) (Phosphodeoxyribomutase) (Phosphoglucomutase-1) (Phosphopentomutase) (EC 5.4.2.7)				0.909256	0.0101216	Down
Q7TT37	Elp1 Ikap Ikbkap	Elongator complex protein 1 (ELP1) (IkappaB kinase complex-associated protein) (IKK complex-associated protein)	1.17253	0.000257321	Up	1.43121	0.000257321	Up
Q80TE0	Rpap1 Kiaa1403	RNA polymerase II-associated protein 1				1.35962	0.0300774	Up
Q80TL7	Mon2 Kiaa1040 Sf21	Protein MON2 homolog (Protein SF21)				1.23903	0.0161391	Up
Q80TM9	Nisch Kiaa0975	Nischarin (Imidazoline receptor 1) (I-1) (IR1) (Imidazoline receptor I-1-like protein) (Imidazoline-1 receptor) (I1R)	1.11848	0.0142736	Up	1.09005	0.0142736	Up
Q80TV8	Clasp1 Kiaa0622	CLIP-associating protein 1 (Cytoplasmic linker-associated protein 1)				1.09223	0.00660801	Up
Q80U44	Zfyve16 Kiaa0305	Zinc finger FYVE domain-containing protein 16 (Endofin) (Endosomal-associated FYVE domain protein)	0.754893	0.000358343	Down	0.733149	0.000358343	Down
Q80U58	Pum2 Kiaa0235	Pumilio homolog 2				1.13204	0.0033073	Up
Q80U70	Suz12 D11Ertd530e Kiaa0160	Polycomb protein Suz12 (Suppressor of zeste 12 protein homolog)	1.25239	0.00204128	Up	1.47474	0.00204128	Up
Q80U87	Usp8 Kiaa0055 Ubpy	Ubiquitin carboxyl-terminal hydrolase 8 (EC 3.4.19.12) (Deubiquitinating enzyme 8) (Ubiquitin isopeptidase Y) (mUBPy) (Ubiquitin thioesterase 8) (Ubiquitin-specific-processing protease 8)	1.20578	0.000558157	Up	1.33584	0.000558157	Up
Q80U95	Ube3c Kiaa0010 Kiaa10	Ubiquitin-protein ligase E3C (EC 2.3.2.26) (HECT-type ubiquitin transferase E3C)				1.2057	0.026603	Up
Q80UJ7	Rab3gap1 Kiaa0066 Rab3gap	Rab3 GTPase-activating protein catalytic subunit (RAB3 GTPase-activating protein 130 kDa subunit) (Rab3-GAP p130) (Rab3-GAP)	0.90827	0.000140487	Down	1.11127	0.000140487	Up
Q80UM3	Naa15 Narg1 Nat1 Tbdn-1 Tubedown	N-alpha-acetyltransferase 15, NatA auxiliary subunit (N-terminal acetyltransferase 1) (NMDA receptor-regulated protein 1) (Protein tubedown-1)	0.929521	0.0446083	Down
Q80UV9	Taf1 Ccg1	Transcription initiation factor TFIID subunit 1 (EC 2.3.1.48) (EC 2.7.11.1) (Cell cycle gene 1 protein) (TBP-associated factor 250 kDa) (p250) (Transcription initiation factor TFIID 250 kDa subunit) (TAF(II)250) (TAFII-250) (TAFII250)	1.24668	0.000358343	Up	1.66434	0.000358343	Up
Q80UW8	Polr2e	DNA-directed RNA polymerases I, II, and III subunit RPABC1 (RNA polymerases I, II, and III subunit ABC1) (DNA-directed RNA polymerase II subunit E) (RPB5 homolog)	1.15438	0.000218034	Up	1.3595	0.000218034	Up
Q80UZ2	Sdad1	Protein SDA1 homolog (SDA1 domain-containing protein 1)				1.16471	0.0287103	Up
Q80V62	Fancd2	Fanconi anemia group D2 protein homolog (Protein FACD2)	1.31969	0.00217395	Up	1.52195	0.00217395	Up
Q80V86	Ints8	Integrator complex subunit 8 (Int8)				1.24469	0.0064116	Up
Q80VD1	Fam98b	Protein FAM98B				1.12511	0.00062192	Up
Q80VI1	Trim56	E3 ubiquitin-protein ligase TRIM56 (EC 2.3.2.27) (RING-type E3 ubiquitin transferase TRIM56) (Tripartite motif-containing protein 56)	0.9348	0.000705736	Down	1.06791	0.000705736	Up
Q80VJ3	Dnph1 Rcl	2'-deoxynucleoside 5'-phosphate N-hydrolase 1 (EC 3.2.2.-) (c-Myc-responsive protein Rcl)	1.14994	0.000127333	Up	1.23884	0.000127333	Up
Q80W00	Ppp1r10 Cat53 Pnuts	Serine/threonine-protein phosphatase 1 regulatory subunit 10 (MHC class I region proline-rich protein CAT53)	0.914565	0.0127255	Down
Q80W14	Prpf40b Hypc	Pre-mRNA-processing factor 40 homolog B (Huntingtin yeast partner C) (Huntingtin-interacting protein C)	0.904992	0.0469639	Down
Q80WE4	Kif20b Mphosph1	Kinesin-like protein KIF20B (Kinesin family member 20B) (Kinesin-related motor interacting with PIN1) (M-phase phosphoprotein 1) (MPP1)	1.35531	0.00113092	Up	1.4884	0.00113092	Up
Q80WQ2	Vac14 D8Wsu151e	Protein VAC14 homolog	1.25709	0.012125	Up	1.33505	0.012125	Up
Q80X50	Ubap2l	Ubiquitin-associated protein 2-like	0.946579	0.000958762	Down
Q80X82	Sympk	Symplekin				1.31959	0.00178996	Up
Q80X85	Mrps7	28S ribosomal protein S7, mitochondrial (MRP-S7) (S7mt)	0.88908	0.00176333	Down	0.777403	0.00176333	Down
Q80X90	Flnb	Filamin-B (FLN-B) (ABP-280-like protein) (Actin-binding-like protein) (Beta-filamin)	0.84999	8.05003e-07	Down	0.791444	8.05003e-07	Down
Q80XQ2	Tbc1d5	TBC1 domain family member 5				1.10399	0.00241071	Up
Q80XU3	Nucks1 Nucks	Nuclear ubiquitous casein and cyclin-dependent kinase substrate 1 (JC7)	1.21949	0.00093465	Up
Q80Y19	Arhgap11a Kiaa0013	Rho GTPase-activating protein 11A (Rho-type GTPase-activating protein 11A)	1.43704	0.00111958	Up	1.58271	0.00111958	Up
Q80Y44	Ddx10	Probable ATP-dependent RNA helicase DDX10 (EC 3.6.4.13) (DEAD box protein 10)	1.19836	0.00161618	Up	1.24333	0.00161618	Up
Q80Y98	Ddhd2 Kiaa0725 Samwd1	Phospholipase DDHD2 (EC 3.1.1.-) (DDHD domain-containing protein 2) (SAM, WWE and DDHD domain-containing protein 1)	1.29214	0.00265546	Up	1.3904	0.00265546	Up
Q80YQ8	Rmnd5a	E3 ubiquitin-protein ligase RMND5A (EC 2.3.2.27) (Protein RMD5 homolog A)	1.34299	0.00177963	Up	1.61732	0.00177963	Up
Q80YT7	Pde4dip Kiaa0454	Myomegalin (Phosphodiesterase 4D-interacting protein)				1.36499	0.0139512	Up
Q80YV2	Zc3hc1 Nipa	Nuclear-interacting partner of ALK (Nuclear-interacting partner of anaplastic lymphoma kinase) (mNIPA) (Zinc finger C3HC-type protein 1)	1.11711	0.00831837	Up	1.19478	0.00831837	Up
Q80YV3	Trrap	Transformation/transcription domain-associated protein (Tra1 homolog)	1.13508	0.00107727	Up	1.29631	0.00107727	Up
Q80YW0	Cyth4 Pscd4	Cytohesin-4 (PH, SEC7 and coiled-coil domain-containing protein 4)	1.1643	0.00544774	Up	1.24242	0.00544774	Up
Q80ZS3	Mrps26	28S ribosomal protein S26, mitochondrial (MRP-S26) (S26mt)	0.915898	0.000633461	Down	0.814403	0.000633461	Down
Q810A7	Ddx42	ATP-dependent RNA helicase DDX42 (EC 3.6.4.13) (DEAD box protein 42)				1.29321	0.00133978	Up
Q810U5	Ccdc50	Coiled-coil domain-containing protein 50 (Protein Ymer)				1.08795	0.0355412	Up
Q810V0	Mphosph10	U3 small nucleolar ribonucleoprotein protein MPP10 (M phase phosphoprotein 10)				1.22266	0.00232194	Up
Q8BFQ4	Wdr82 Cdw5	WD repeat-containing protein 82				1.12606	0.0075202	Up
Q8BFR4	Gns	N-acetylglucosamine-6-sulfatase (EC 3.1.6.14) (Glucosamine-6-sulfatase) (G6S)				0.846808	0.0122279	Down
Q8BFR5	Tufm	Elongation factor Tu, mitochondrial	0.939577	0.0081357	Down
Q8BFY9	Tnpo1 Kpnb2	Transportin-1 (Importin beta-2) (Karyopherin beta-2)	1.06957	0.000125677	Up	1.23935	0.000125677	Up
Q8BG05	Hnrnpa3 Hnrpa3	Heterogeneous nuclear ribonucleoprotein A3 (hnRNP A3)				1.10779	0.00719643	Up
Q8BG07	Pld4	5'-3' exonuclease PLD4 (EC 3.1.16.1) (Choline phosphatase 4) (Phosphatidylcholine-hydrolyzing phospholipase D4) (Phospholipase D4) (PLD 4)	1.38438	0.00476383	Up	1.3053	0.00476383	Up
Q8BG30	Nelfa Whsc2 Whsc2h	Negative elongation factor A (NELF-A) (Wolf-Hirschhorn syndrome candidate 2 homolog) (mWHSC2)				1.39975	0.018487	Up
Q8BG32	Psmd11	26S proteasome non-ATPase regulatory subunit 11 (26S proteasome regulatory subunit RPN6) (26S proteasome regulatory subunit S9) (26S proteasome regulatory subunit p44.5)				0.881012	0.00292653	Down
Q8BG73	Sh3bgrl2	SH3 domain-binding glutamic acid-rich-like protein 2				0.884628	0.010282	Down
Q8BG94	Commd7	COMM domain-containing protein 7				1.4569	0.0426836	Up
Q8BG95	Ppp1r12b Mypt2	Protein phosphatase 1 regulatory subunit 12B (Myosin phosphatase-targeting subunit 2) (Myosin phosphatase target subunit 2)				1.29771	0.00440062	Up
Q8BGA5	Krr1 Hrb2	KRR1 small subunit processome component homolog (HIV-1 Rev-binding protein 2 homolog) (KRR-R motif-containing protein 1)	1.48297	6.62291e-05	Up	1.60122	6.62291e-05	Up
Q8BGA7		Uncharacterized protein C7orf26 homolog	1.54419	0.0070525	Up	1.48489	0.0070525	Up
Q8BGC0	Htatsf1	HIV Tat-specific factor 1 homolog	1.05178	0.000420721	Up	1.17937	0.000420721	Up
Q8BGD9	Eif4b	Eukaryotic translation initiation factor 4B (eIF-4B)	1.19507	0.000211997	Up
Q8BGE6	Atg4b Apg4b Autl1 Kiaa0943	Cysteine protease ATG4B (EC 3.4.22.-) (AUT-like 1 cysteine endopeptidase) (Autophagin-1) (Autophagy-related cysteine endopeptidase 1) (Autophagy-related protein 4 homolog B)				1.2303	0.0177813	Up
Q8BGF7	Pan2 Kiaa0710 Usp52	PAN2-PAN3 deadenylation complex catalytic subunit Pan2 (EC 3.1.13.4) (Inactive ubiquitin carboxyl-terminal hydrolase 52) (PAB1P-dependent poly(A)-specific ribonuclease) (Poly(A)-nuclease deadenylation complex subunit 2) (PAN deadenylation complex subunit 2)	1.19166	0.000617024	Up	1.43302	0.000617024	Up
Q8BGG7	Ubash3b Sts1	Ubiquitin-associated and SH3 domain-containing protein B (EC 3.1.3.48) (Cbl-interacting protein p70) (Suppressor of T-cell receptor signaling 1) (STS-1) (T-cell ubiquitin ligand 2) (TULA-2) (Tyrosine-protein phosphatase STS1/TULA2)	0.917627	0.0115575	Down
Q8BGQ7	Aars1 Aars	Alanine--tRNA ligase, cytoplasmic (EC 6.1.1.7) (Alanyl-tRNA synthetase) (AlaRS) (Protein sticky) (Sti)	1.03481	0.0461634	Up
Q8BGR9	Ublcp1	Ubiquitin-like domain-containing CTD phosphatase 1 (EC 3.1.3.16) (Nuclear proteasome inhibitor UBLCP1)	1.19679	0.000382103	Up	1.3701	0.000382103	Up
Q8BGT7	Smndc1 Smnr Spf30	Survival of motor neuron-related-splicing factor 30 (30 kDa splicing factor SMNrp) (SMN-related protein) (Survival motor neuron domain-containing protein 1)	0.898422	0.0478025	Down
Q8BGW1	Fto Kiaa1752	Alpha-ketoglutarate-dependent dioxygenase FTO (Fat mass and obesity-associated protein) (Protein fatso) (U6 small nuclear RNA (2'-O-methyladenosine-N(6)-)-demethylase FTO) (EC 1.14.11.-) (U6 small nuclear RNA N(6)-methyladenosine-demethylase FTO) (EC 1.14.11.-) (mRNA (2'-O-methyladenosine-N(6)-)-demethylase FTO) (m6A(m)-demethylase FTO) (EC 1.14.11.-) (mRNA N(6)-methyladenosine demethylase FTO) (…	1.19242	0.000176219	Up	1.4037	0.000176219	Up
Q8BH15	Cnot10	CCR4-NOT transcription complex subunit 10	1.44614	0.00878671	Up	1.53185	0.00878671	Up
Q8BH43	Wasf2 Wave2	Wiskott-Aldrich syndrome protein family member 2 (WASP family protein member 2) (Protein WAVE-2)				0.930587	0.0462612	Down
Q8BH50		Uncharacterized protein C18orf25 homolog	0.907964	0.000519517	Down	0.870514	0.000519517	Down
Q8BH57	Wdr48 Kiaa1449 Uaf1	WD repeat-containing protein 48 (USP1-associated factor 1)				1.33098	0.0113891	Up
Q8BH64	Ehd2	EH domain-containing protein 2	0.6959	0.00043741	Down	0.701353	0.00043741	Down
Q8BH74	Nup107	Nuclear pore complex protein Nup107 (107 kDa nucleoporin) (Nucleoporin Nup107)				1.17481	0.0075202	Up
Q8BH95	Echs1	Enoyl-CoA hydratase, mitochondrial (EC 4.2.1.17) (Enoyl-CoA hydratase 1) (Short-chain enoyl-CoA hydratase) (SCEH)	0.958575	1.59176e-05	Down	0.700931	1.59176e-05	Down
Q8BHG2	Czib	CXXC motif containing zinc binding protein (UPF0587 protein C1orf123 homolog)	0.97469	0.0109438	Down	0.957883	0.0109438	Down
Q8BHG9	Cggbp1	CGG triplet repeat-binding protein 1 (CGG-binding protein 1) (20 kDa CGG-binding protein) (p20-CGGBP DNA-binding protein)	1.161	0.000766491	Up	1.3881	0.000766491	Up
Q8BHJ9	Slu7 D11Ertd730e	Pre-mRNA-splicing factor SLU7	1.1385	8.30726e-05	Up	1.3723	8.30726e-05	Up
Q8BHL5	Elmo2 Kiaa1834	Engulfment and cell motility protein 2 (Protein ced-12 homolog A)	1.30203	0.0195328	Up	1.35349	0.0195328	Up
Q8BHN3	Ganab G2an Kiaa0088	Neutral alpha-glucosidase AB (EC 3.2.1.207) (Alpha-glucosidase 2) (Glucosidase II subunit alpha)				0.935934	0.0380446	Down
Q8BHX1	Haus1 Ccdc5	HAUS augmin-like complex subunit 1 (Coiled-coil domain-containing protein 5)	1.35222	5.00221e-05	Up	1.60619	5.00221e-05	Up
Q8BHY2	Noc4l	Nucleolar complex protein 4 homolog (NOC4 protein homolog) (NOC4-like protein) (Nucleolar complex-associated protein 4-like protein)				0.92013	0.0408841	Down
Q8BIJ7	Rufy1 Rabip4	RUN and FYVE domain-containing protein 1 (Rab4-interacting protein)				1.19753	0.027061	Up
Q8BIP0	Dars2	Aspartate--tRNA ligase, mitochondrial (EC 6.1.1.12) (Aspartyl-tRNA synthetase) (AspRS)	0.799932	0.0304281	Down	0.751035	0.0304281	Down
Q8BIW1	Prune1 Prune	Exopolyphosphatase PRUNE1 (EC 3.6.1.1) (PRUNEM1)	1.1947	0.00217395	Up	1.22557	0.00217395	Up
Q8BJ05	Zc3h14	Zinc finger CCCH domain-containing protein 14				1.15498	0.0306695	Up
Q8BJM3	R3hcc1l D19Ertd386e Gidrp88	Coiled-coil domain-containing protein R3HCC1L (Growth inhibition and differentiation-related protein 88 homolog) (R3H and coiled-coil domain-containing protein 1-like)				1.24757	0.00588901	Up
Q8BJU0	Sgta Sgt	Small glutamine-rich tetratricopeptide repeat-containing protein alpha (Alpha-SGT)				1.09095	0.0247817	Up
Q8BJW6	Eif2a D3Ertd194e	Eukaryotic translation initiation factor 2A (eIF-2A) [Cleaved into: Eukaryotic translation initiation factor 2A, N-terminally processed]				1.05986	0.0211905	Up
Q8BJZ4	Mrps35	28S ribosomal protein S35, mitochondrial (MRP-S35) (S35mt)	0.922974	0.00914178	Down	0.868616	0.00914178	Down
Q8BK64	Ahsa1	Activator of 90 kDa heat shock protein ATPase homolog 1 (AHA1)				1.06196	0.00847287	Up
Q8BK67	Rcc2 Kiaa1470	Protein RCC2	1.07987	0.00138079	Up	1.19156	0.00138079	Up
Q8BK72	Mrps27	28S ribosomal protein S27, mitochondrial (MRP-S27) (S27mt) (Mitochondrial ribosomal protein S27)	0.901219	4.5872e-05	Down	0.734379	4.5872e-05	Down
Q8BKS9	Pum3 D19Bwg1357e Kiaa0020	Pumilio homolog 3	0.890294	0.00586756	Down
Q8BKT3	Gcfc2 Gcf Tcf9	Intron Large complex component GCFC2 (GC-rich sequence DNA-binding factor) (GC-rich sequence DNA-binding factor 2) (Transcription factor 9) (TCF-9)				1.38368	0.0258152	Up
Q8BKZ9	Pdhx	Pyruvate dehydrogenase protein X component, mitochondrial (Dihydrolipoamide dehydrogenase-binding protein of pyruvate dehydrogenase complex) (Lipoyl-containing pyruvate dehydrogenase complex component X)				0.755122	0.000544257	Down
Q8BL48	Unk Kiaa1753 Zc3h5 Zc3hdc5	RING finger protein unkempt homolog (Zinc finger CCCH domain-containing protein 5)	1.12162	0.00314119	Up	1.21123	0.00314119	Up
Q8BL66	Eea1	Early endosome antigen 1	0.899023	4.39047e-05	Down	0.7479	4.39047e-05	Down
Q8BL97	Srsf7 Sfrs7	Serine/arginine-rich splicing factor 7 (Splicing factor, arginine/serine-rich 7)				0.76869	0.030509	Down
Q8BLH7	Hirip3	HIRA-interacting protein 3				1.28549	0.0070977	Up
Q8BM39	Prpf18 Prp18	Pre-mRNA-splicing factor 18 (PRP18 homolog)				1.26094	0.0149699	Up
Q8BMB3	Eif4e2 Eif4el3	Eukaryotic translation initiation factor 4E type 2 (eIF-4E type 2) (eIF4E type 2) (eIF4E-2) (mRNA cap-binding protein type 2) (Eukaryotic translation initiation factor 4E-like 3) (eIF4E-like protein 4E-LP)				1.2005	0.030509	Up
Q8BMC4	Nop9	Nucleolar protein 9 (Pumilio domain-containing protein NOP9)				1.23537	0.0329313	Up
Q8BMF4	Dlat	Dihydrolipoyllysine-residue acetyltransferase component of pyruvate dehydrogenase complex, mitochondrial (EC 2.3.1.12) (Dihydrolipoamide acetyltransferase component of pyruvate dehydrogenase complex) (Pyruvate dehydrogenase complex component E2) (PDC-E2) (PDCE2)				0.755688	0.00333559	Down
Q8BMJ2	Lars1 Lars	Leucine--tRNA ligase, cytoplasmic (EC 6.1.1.4) (Leucyl-tRNA synthetase) (LeuRS)	1.04777	0.00472974	Up	1.0897	0.00472974	Up
Q8BMJ3	Eif1ax Eif1ay	Eukaryotic translation initiation factor 1A, X-chromosomal (eIF-1A X isoform) (Eukaryotic translation initiation factor 4C) (eIF-4C)	0.895894	0.0217813	Down
Q8BMK4	Ckap4	Cytoskeleton-associated protein 4 (63-kDa cytoskeleton-linking membrane protein) (Climp-63) (p63)	0.913827	0.0102464	Down	0.938822	0.0102464	Down
Q8BMQ8	Mon1b Kiaa0872	Vacuolar fusion protein MON1 homolog B				0.849163	0.0195069	Down
Q8BMS9	Rassf2 Kiaa0168	Ras association domain-containing protein 2	1.24192	0.000358343	Up	1.47218	0.000358343	Up
Q8BNU0	Armc6	Armadillo repeat-containing protein 6				1.19971	0.000192746	Up
Q8BNV1	Trmt2a Htf9-c Htf9c	tRNA (uracil-5-)-methyltransferase homolog A (EC 2.1.1.-) (HpaII tiny fragments locus 9c protein)	1.08765	0.000759096	Up	1.27746	0.000759096	Up
Q8BNW9	Kbtbd11 Kiaa0711	Kelch repeat and BTB domain-containing protein 11	1.31133	0.00473556	Up	1.38681	0.00473556	Up
Q8BP47	NARS1 Nars	Asparagine--tRNA ligase, cytoplasmic (EC 6.1.1.22) (Asparaginyl-tRNA synthetase) (AsnRS) (Asparaginyl-tRNA synthetase 1)				0.930286	0.0325312	Down
Q8BP67	Rpl24	60S ribosomal protein L24				1.06834	0.00566623	Up
Q8BP78	Fra10ac1	Protein FRA10AC1 homolog				1.20642	0.00105944	Up
Q8BPU7	Elmo1	Engulfment and cell motility protein 1 (Protein ced-12 homolog)	1.08228	0.00360816	Up	1.18695	0.00360816	Up
Q8BPZ8	Abraxas1 Abra1 Ccdc98 Fam175a	BRCA1-A complex subunit Abraxas 1 (Coiled-coil domain-containing protein 98) (Protein FAM175A)	1.24198	0.0019038	Up	1.42748	0.0019038	Up
Q8BQ33	Ticrr	Treslin (TopBP1-interacting checkpoint and replication regulator) (TopBP1-interacting, replication-stimulating protein)	1.29623	0.00472127	Up	1.53542	0.00472127	Up
Q8BQM4	Heatr3	HEAT repeat-containing protein 3				1.19661	0.00208775	Up
Q8BR90		UPF0600 protein C5orf51 homolog	0.939665	0.018973	Down
Q8BRT1	Clasp2 Kiaa0627	CLIP-associating protein 2 (Cytoplasmic linker-associated protein 2)				1.24169	0.00124104	Up
Q8BSP2	Ncaph2 D15Ertd785e	Condensin-2 complex subunit H2 (Kleisin-beta) (Non-SMC condensin II complex subunit H2)				1.31862	0.0259261	Up
Q8BSY0	Asph Bah	Aspartyl/asparaginyl beta-hydroxylase (EC 1.14.11.16) (Aspartate beta-hydroxylase) (ASP beta-hydroxylase) (Peptide-aspartate beta-dioxygenase)				0.684556	0.00235682	Down
Q8BT07	Cep55	Centrosomal protein of 55 kDa (Cep55)	1.1943	4.11666e-05	Up	1.42616	4.11666e-05	Up
Q8BTJ4	Enpp4 Kiaa0879	Bis(5'-adenosyl)-triphosphatase enpp4 (EC 3.6.1.29) (AP3A hydrolase) (AP3Aase) (Ectonucleotide pyrophosphatase/phosphodiesterase family member 4) (E-NPP 4) (NPP-4)	0.852286	0.000238821	Down	0.58797	0.000238821	Down
Q8BTM8	Flna Fln Fln1	Filamin-A (FLN-A) (Actin-binding protein 280) (ABP-280) (Alpha-filamin) (Endothelial actin-binding protein) (Filamin-1) (Non-muscle filamin)	0.921441	6.79634e-05	Down	0.859001	6.79634e-05	Down
Q8BTU1	Cfap20 Gtl3	Cilia- and flagella-associated protein 20 (Gene trap locus 3 protein)	0.897986	0.0115608	Down	0.841276	0.0115608	Down
Q8BTY2	Slc4a7 Nbc3	Sodium bicarbonate cotransporter 3 (Solute carrier family 4 member 7)	0.800379	0.00250042	Down	0.680418	0.00250042	Down
Q8BTZ7	Gmppb	Mannose-1-phosphate guanyltransferase beta (EC 2.7.7.13) (GDP-mannose pyrophosphorylase B) (GTP-mannose-1-phosphate guanylyltransferase beta)				0.883672	0.0398255	Down
Q8BU03	Pwp2 Pwp2h	Periodic tryptophan protein 2 homolog	1.13061	0.000329699	Up	1.29857	0.000329699	Up
Q8BU04	Ubr7	Putative E3 ubiquitin-protein ligase UBR7 (EC 2.3.2.27) (N-recognin-7) (RING-type E3 ubiquitin transferase UBR7)	1.30508	0.00145049	Up	1.43782	0.00145049	Up
Q8BU30	Iars1 Iars	Isoleucine--tRNA ligase, cytoplasmic (EC 6.1.1.5) (Isoleucyl-tRNA synthetase) (IRS) (IleRS)				1.09959	0.015997	Up
Q8BU88	Mrpl22	39S ribosomal protein L22, mitochondrial (L22mt) (MRP-L22)				0.781032	0.0163347	Down
Q8BUK6	Hook3	Protein Hook homolog 3 (mHK3)				1.12376	0.0199996	Up
Q8BV49	Pyhin1 Ifi209 Ifix	Pyrin and HIN domain-containing protein 1 (Interferon-inducible protein 209) (Ifi-209) (Interferon-inducible protein X) (Interferon-inducible protein p209)	0.825896	2.25782e-06	Down	0.549626	2.25782e-06	Down
Q8BV66	Ifi44 Mtap44	Interferon-induced protein 44 (Microtubule-associated protein 44)	0.780543	2.93377e-05	Down	0.625171	2.93377e-05	Down
Q8BVE3	Atp6v1h	V-type proton ATPase subunit H (V-ATPase subunit H) (Vacuolar proton pump subunit H)				0.735332	0.000904775	Down
Q8BVE8	Nsd2 Kiaa1090 Whsc1	Histone-lysine N-methyltransferase NSD2 (EC 2.1.1.357) (Multiple myeloma SET domain-containing protein) (MMSET) (Nuclear SET domain-containing protein 2) (Wolf-Hirschhorn syndrome candidate 1 protein homolog)				1.24544	0.0437551	Up
Q8BVF2	Pdcl3 Viaf1	Phosducin-like protein 3 (Viral IAP-associated factor 1) (VIAF-1)	0.86171	0.00402907	Down
Q8BVH9	Mettl6	tRNA N(3)-methylcytidine methyltransferase METTL6 (EC 2.1.1.-) (Methyltransferase-like protein 6)	0.779385	0.0443222	Down	0.7502	0.0443222	Down
Q8BVK9	Sp110 Ifi75 Ipr1	Sp110 nuclear body protein (Intracellular pathogen resistance protein 1)	0.734749	0.0167398	Down
Q8BVQ5	Ppme1 Pme1	Protein phosphatase methylesterase 1 (PME-1) (EC 3.1.1.89)				0.888853	0.0182006	Down
Q8BVW3	Trim14 Kiaa0129 Pub	Tripartite motif-containing protein 14 (PU.1-binding protein)	0.821704	0.00178996	Down
Q8BW96	Camk1d	Calcium/calmodulin-dependent protein kinase type 1D (EC 2.7.11.17) (CaM kinase I delta) (CaM-KI delta) (CaMKI delta) (CaM kinase ID) (CaMKI-like protein kinase) (CKLiK) (mCKLiK)				1.15417	0.004882	Up
Q8BWJ3	Phka2	Phosphorylase b kinase regulatory subunit alpha, liver isoform (Phosphorylase kinase alpha L subunit)				1.32839	0.00316613	Up
Q8BWR2	Pithd1 Trp26	PITH domain-containing protein 1	1.37278	0.0192699	Up	1.3864	0.0192699	Up
Q8BWU5	Osgep	Probable tRNA N6-adenosine threonylcarbamoyltransferase (EC 2.3.1.234) (N6-L-threonylcarbamoyladenine synthase) (t(6)A synthase) (O-sialoglycoprotein endopeptidase) (t(6)A37 threonylcarbamoyladenosine biosynthesis protein Osgep) (tRNA threonylcarbamoyladenosine biosynthesis protein Osgep)	1.08046	0.0290825	Up	1.09342	0.0290825	Up
Q8BWY9	Cip2a Kiaa1524	Protein CIP2A (Cancerous inhibitor of PP2A) (p90 autoantigen homolog)	1.16152	2.45547e-05	Up	1.53783	2.45547e-05	Up
Q8BWZ3	Naa25 Mdm20	N-alpha-acetyltransferase 25, NatB auxiliary subunit (Mitochondrial distribution and morphology protein 20) (N-terminal acetyltransferase B complex subunit MDM20) (NatB complex subunit MDM20) (N-terminal acetyltransferase B complex subunit NAA25)	0.842836	0.000156281	Down	0.743559	0.000156281	Down
Q8BX09	Rbbp5	Retinoblastoma-binding protein 5 (RBBP-5)	1.24781	0.0180063	Up	1.31721	0.0180063	Up
Q8BX10	Pgam5	Serine/threonine-protein phosphatase PGAM5, mitochondrial (EC 3.1.3.16) (Phosphoglycerate mutase family member 5)				0.670021	8.95572e-05	Down
Q8BX70	Vps13c Kiaa3021	Vacuolar protein sorting-associated protein 13C	1.13178	7.49331e-05	Up	1.26022	7.49331e-05	Up
Q8BXC6	Commd2	COMM domain-containing protein 2	1.15058	4.9398e-05	Up	1.2592	4.9398e-05	Up
Q8BXN9	Tmem87a	Transmembrane protein 87A	1.46898	0.0159677	Up	1.2946	0.0159677	Up
Q8BY35	Fgd2	FYVE, RhoGEF and PH domain-containing protein 2				1.61271	0.0116909	Up
Q8BY71	Hat1	Histone acetyltransferase type B catalytic subunit (EC 2.3.1.48) (Histone acetyltransferase 1)				1.14189	0.00548206	Up
Q8BYC6	Taok3	Serine/threonine-protein kinase TAO3 (EC 2.7.11.1) (Thousand and one amino acid protein 3)				1.26555	0.000463436	Up
Q8BYW1	Arhgap25 Kiaa0053	Rho GTPase-activating protein 25 (Rho-type GTPase-activating protein 25)				0.868909	0.0180801	Down
Q8BYY4	Ttc39b T39	Tetratricopeptide repeat protein 39B (TPR repeat protein 39B)				1.12485	0.0420333	Up
Q8BZA9	Tigar	Fructose-2,6-bisphosphatase TIGAR (EC 3.1.3.46) (TP53-induced glycolysis and apoptosis regulator) (TP53-induced glycolysis regulatory phosphatase)				1.14461	0.0145982	Up
Q8BZN6	Dock10 Kiaa0694 Ziz3	Dedicator of cytokinesis protein 10 (Zizimin-3)	0.910185	0.0471593	Down
Q8C050	Rps6ka5 Msk1	Ribosomal protein S6 kinase alpha-5 (S6K-alpha-5) (EC 2.7.11.1) (90 kDa ribosomal protein S6 kinase 5) (Nuclear mitogen- and stress-activated protein kinase 1) (RSK-like protein kinase) (RLSK)	1.37627	5.92432e-05	Up	1.54525	5.92432e-05	Up
Q8C052	Map1s Bpy2ip1 Map8 Mtap1s	Microtubule-associated protein 1S (MAP-1S) (BPY2-interacting protein 1) (Microtubule-associated protein 8) [Cleaved into: MAP1S heavy chain; MAP1S light chain]				1.12643	0.0485311	Up
Q8C078	Camkk2 Kiaa0787	Calcium/calmodulin-dependent protein kinase kinase 2 (CaM-KK 2) (CaM-kinase kinase 2) (CaMKK 2) (EC 2.7.11.17) (Calcium/calmodulin-dependent protein kinase kinase beta) (CaM-KK beta) (CaM-kinase kinase beta) (CaMKK beta)	0.906106	0.0402293	Down
Q8C079	Strip1 Fam40a Kiaa1761	Striatin-interacting protein 1 (Protein FAM40A)	0.810838	0.0301	Down
Q8C0D0	Trub1	Probable tRNA pseudouridine synthase 1 (EC 5.4.99.-)				1.47488	0.00761237	Up
Q8C0D5	Efl1 Eftud1	Elongation factor-like GTPase 1 (Elongation factor Tu GTP-binding domain-containing protein 1) (Elongation factor-like 1) (Protein FAM42A)	0.900984	0.0380948	Down
Q8C0I1	Agps	Alkyldihydroxyacetonephosphate synthase, peroxisomal (Alkyl-DHAP synthase) (EC 2.5.1.26) (Alkylglycerone-phosphate synthase)	0.886355	0.0045918	Down	0.842905	0.0045918	Down
Q8C0L8	Cog5	Conserved oligomeric Golgi complex subunit 5 (COG complex subunit 5) (Component of oligomeric Golgi complex 5)				1.18996	0.00240107	Up
Q8C0M9	Asrgl1	Isoaspartyl peptidase/L-asparaginase (EC 3.4.19.5) (EC 3.5.1.1) (Asparaginase-like protein 1) (Beta-aspartyl-peptidase) (Isoaspartyl dipeptidase) (L-asparagine amidohydrolase) [Cleaved into: Isoaspartyl peptidase/L-asparaginase alpha chain; Isoaspartyl peptidase/L-asparaginase beta chain]	1.09169	0.00334176	Up	1.21183	0.00334176	Up
Q8C129	Lnpep	Leucyl-cystinyl aminopeptidase (Cystinyl aminopeptidase) (EC 3.4.11.3) (Oxytocinase) (OTase)				0.710226	0.000656719	Down
Q8C156	Ncaph Brrn Brrn1 Caph	Condensin complex subunit 2 (Barren homolog protein 1) (Chromosome-associated protein H) (mCAP-H) (Non-SMC condensin I complex subunit H) (XCAP-H homolog)	1.04133	4.96903e-05	Up	1.21719	4.96903e-05	Up
Q8C166	Cpne1	Copine-1 (Copine I)				0.893846	0.0145439	Down
Q8C176	Taf2	Transcription initiation factor TFIID subunit 2 (TBP-associated factor 150 kDa) (Transcription initiation factor TFIID 150 kDa subunit) (TAF(II)150) (TAFII-150) (TAFII150)				1.36835	0.00152608	Up
Q8C1D8	Iws1 Iws1l	Protein IWS1 homolog (IWS1-like protein)				1.22219	0.000303803	Up
Q8C2E4	Ptcd1	Pentatricopeptide repeat-containing protein 1, mitochondrial	0.695486	0.0371873	Down	0.75323	0.0371873	Down
Q8C2K1	Def6 Ibp Slat	Differentially expressed in FDCP 6 (DEF-6) (IRF4-binding protein) (SWAP-70-like adapter of T-cells)				1.1623	0.00476146	Up
Q8C2Q3	Rbm14	RNA-binding protein 14 (RNA-binding motif protein 14)				1.32782	0.00841379	Up
Q8C3J5	Dock2	Dedicator of cytokinesis protein 2 (Protein Hch)	1.12624	0.00139267	Up	1.23267	0.00139267	Up
Q8C3Y4	Kntc1 Kiaa0166	Kinetochore-associated protein 1	1.22822	0.0110787	Up	1.38461	0.0110787	Up
Q8C4B4	Unc119b	Protein unc-119 homolog B				1.33373	0.0198077	Up
Q8C4J7	Tbl3	Transducin beta-like protein 3	1.13611	0.000378896	Up	1.33958	0.000378896	Up
Q8C4Y3	Nelfb Cobra1 MNCb-5210	Negative elongation factor B (NELF-B) (Cofactor of BRCA1)				1.14359	0.0116447	Up
Q8C570	Rae1 Mrnp41	mRNA export factor (Rae1 protein homolog) (mRNA-associated protein mrnp 41)				1.15313	0.00227095	Up
Q8C5P5	Nt5dc1 Nt5c2l1	5'-nucleotidase domain-containing protein 1 (EC 3.1.3.-) (Cytosolic 5'-nucleotidase II-like protein 1)	1.06109	0.000510914	Up	1.17802	0.000510914	Up
Q8C5Q4	Grsf1	G-rich sequence factor 1 (GRSF-1)	0.959006	0.00108119	Down	1.06044	0.00108119	Up
Q8C6G8	Wdr26	WD repeat-containing protein 26				0.893764	0.0217667	Down
Q8C6I2	Sdhaf2 Pgl2 Sdh5	Succinate dehydrogenase assembly factor 2, mitochondrial (SDH assembly factor 2) (SDHAF2)	0.936514	1.31534e-05	Down	0.693389	1.31534e-05	Down
Q8C854	Myef2 Kiaa1341 Mef2	Myelin expression factor 2 (MEF-2) (MyEF-2)	0.919565	0.000293872	Down	1.22044	0.000293872	Up
Q8C8U0	Ppfibp1 Kiaa1230	Liprin-beta-1 (Protein tyrosine phosphatase receptor type f polypeptide-interacting protein-binding protein 1) (PTPRF-interacting protein-binding protein 1)	0.877842	0.00211387	Down	1.16961	0.00211387	Up
Q8CAS9	Parp9 Bal	Protein mono-ADP-ribosyltransferase PARP9 (EC 2.4.2.-) (ADP-ribosyltransferase diphtheria toxin-like 9) (ARTD9) (B aggressive lymphoma protein homolog) (Poly [ADP-ribose] polymerase 9) (PARP-9)	0.761988	0.00252295	Down	0.769159	0.00252295	Down
Q8CB96	Rassf4	Ras association domain-containing protein 4	0.796912	0.000283245	Down
Q8CBA2	Slfn5	Schlafen family member 5				0.731894	0.00910312	Down
Q8CBW3	Abi1 Ssh3bp1	Abl interactor 1 (Abelson interactor 1) (Abi-1) (Ablphilin-1) (Eps8 SH3 domain-binding protein) (Eps8-binding protein) (Spectrin SH3 domain-binding protein 1) (e3B1)	0.748441	0.0111535	Down	0.703628	0.0111535	Down
Q8CCF0	Prpf31 Prp31	U4/U6 small nuclear ribonucleoprotein Prp31 (Pre-mRNA-processing factor 31) (U4/U6 snRNP 61 kDa protein) (Protein 61K)				1.1778	0.000618047	Up
Q8CCS6	Pabpn1 Pab2 Pabp2	Polyadenylate-binding protein 2 (PABP-2) (Poly(A)-binding protein 2) (Nuclear poly(A)-binding protein 1) (Poly(A)-binding protein II) (PABII) (Polyadenylate-binding nuclear protein 1)				1.11111	0.000540793	Up
Q8CEE6	Pask Kiaa0135	PAS domain-containing serine/threonine-protein kinase (PAS-kinase) (PASKIN) (EC 2.7.11.1)	1.22968	0.000169224	Up	1.39536	0.000169224	Up
Q8CEI1	Bola3	BolA-like protein 3				0.875551	0.0492171	Down
Q8CF89	Tab1 Map3k7ip1	TGF-beta-activated kinase 1 and MAP3K7-binding protein 1 (Mitogen-activated protein kinase kinase kinase 7-interacting protein 1) (TGF-beta-activated kinase 1-binding protein 1) (TAK1-binding protein 1)				1.2789	0.000489689	Up
Q8CFA1	Irak2	Interleukin-1 receptor-associated kinase-like 2 (IRAK-2) (mu-IRAK-2)	0.644049	0.00889915	Down
Q8CFB4	Gbp5	Guanylate-binding protein 5 (EC 3.6.5.-) (GTP-binding protein 5) (GBP-5) (MuGBP-5) (Guanine nucleotide-binding protein 5)	0.608999	2.25782e-06	Down	0.751479	2.25782e-06	Down
Q8CFE2	Hpf1	Histone PARylation factor 1	1.07377	0.0309444	Up
Q8CFI7	Polr2b	DNA-directed RNA polymerase II subunit RPB2 (EC 2.7.7.6) (DNA-directed RNA polymerase II 140 kDa polypeptide) (DNA-directed RNA polymerase II subunit B) (RNA polymerase II subunit 2) (RNA polymerase II subunit B2)	1.22352	3.08417e-05	Up	1.41953	3.08417e-05	Up
Q8CFQ3	Aqr Kiaa0560	RNA helicase aquarius (EC 3.6.4.13) (Intron-binding protein of 160 kDa)				1.23351	0.012125	Up
Q8CG47	Smc4 Capc Smc4l1	Structural maintenance of chromosomes protein 4 (SMC protein 4) (SMC-4) (Chromosome-associated polypeptide C) (XCAP-C homolog)	1.09948	6.62291e-05	Up	1.30652	6.62291e-05	Up
Q8CG48	Smc2 Cape Fin16 Smc2l1	Structural maintenance of chromosomes protein 2 (SMC protein 2) (SMC-2) (Chromosome-associated protein E) (FGF-inducible protein 16) (XCAP-E homolog)	1.11026	3.29919e-05	Up	1.31388	3.29919e-05	Up
Q8CGC7	Eprs1 Eprs Qprs	Bifunctional glutamate/proline--tRNA ligase (Bifunctional aminoacyl-tRNA synthetase) [Includes: Glutamate--tRNA ligase (EC 6.1.1.17) (Glutamyl-tRNA synthetase) (GluRS); Proline--tRNA ligase (EC 6.1.1.15) (Prolyl-tRNA synthetase) (ProRS)]	1.04449	0.00015643	Up	1.09667	0.00015643	Up
Q8CGF7	Tcerg1 Taf2s	Transcription elongation regulator 1 (Formin-binding protein 28) (FBP 28) (TATA box-binding protein-associated factor 2S) (Transcription factor CA150) (p144)				1.13025	0.0269131	Up
Q8CGK3	Lonp1 Prss15	Lon protease homolog, mitochondrial (EC 3.4.21.53) (Lon protease-like protein) (LONP) (Mitochondrial ATP-dependent protease Lon) (Serine protease 15)	0.926977	0.000468039	Down	0.813031	0.000468039	Down
Q8CGY8	Ogt	UDP-N-acetylglucosamine--peptide N-acetylglucosaminyltransferase 110 kDa subunit (EC 2.4.1.255) (O-GlcNAc transferase subunit p110) (O-linked N-acetylglucosamine transferase 110 kDa subunit) (OGT)				1.17112	0.0140939	Up
Q8CGZ0	Cherp Scaf6	Calcium homeostasis endoplasmic reticulum protein (SR-related CTD-associated factor 6)				1.08036	0.000709503	Up
Q8CH25	Sltm Met	SAFB-like transcription modulator (Modulator of estrogen-induced transcription) (SAF-like transcription modulator)				0.666487	0.0152299	Down
Q8CHG3	Gcc2 Kiaa0336	GRIP and coiled-coil domain-containing protein 2 (185 kDa Golgi coiled-coil protein) (GCC185)	1.24339	0.0342027	Up	1.3025	0.0342027	Up
Q8CHG7	Rapgef2 Kiaa0313 Pdzgef1	Rap guanine nucleotide exchange factor 2 (Cyclic nucleotide ras GEF) (CNrasGEF) (Neural RAP guanine nucleotide exchange protein) (nRap GEP) (PDZ domain-containing guanine nucleotide exchange factor 1) (PDZ-GEF1) (RA-GEF-1) (Ras/Rap1-associating GEF-1)				1.26997	0.0207336	Up
Q8CHP8	Pgp	Glycerol-3-phosphate phosphatase (G3PP) (EC 3.1.3.21) (Aspartate-based ubiquitous Mg(2+)-dependent phosphatase) (AUM) (EC 3.1.3.48) (Phosphoglycolate phosphatase) (PGP)	1.29183	0.000406164	Up	1.25413	0.000406164	Up
Q8CHT3	Ints5	Integrator complex subunit 5 (Int5)	1.23967	0.00847287	Up	1.22347	0.00847287	Up
Q8CI11	Gnl3 Ns	Guanine nucleotide-binding protein-like 3 (Nucleolar GTP-binding protein 3) (Nucleostemin)				1.30344	0.000411854	Up
Q8CI33	Cwf19l1	CWF19-like protein 1				1.12823	0.000489689	Up
Q8CI51	Pdlim5 Enh	PDZ and LIM domain protein 5 (Enigma homolog) (Enigma-like PDZ and LIM domains protein)	0.811323	0.000931569	Down
Q8CI61	Bag4 Sodd	BAG family molecular chaperone regulator 4 (BAG-4) (Bcl-2-associated athanogene 4) (Silencer of death domains)				1.39666	0.0086222	Up
Q8CI94	Pygb	Glycogen phosphorylase, brain form (EC 2.4.1.1)	1.24841	7.19672e-05	Up	1.26019	7.19672e-05	Up
Q8CIE4	Parp10	Protein mono-ADP-ribosyltransferase PARP10 (EC 2.4.2.-) (ADP-ribosyltransferase diphtheria toxin-like 10) (ARTD10) (Poly [ADP-ribose] polymerase 10) (PARP-10)	0.819127	0.000106285	Down	0.749277	0.000106285	Down
Q8CIE6	Copa	Coatomer subunit alpha (Alpha-coat protein) (Alpha-COP) [Cleaved into: Xenin (Xenopsin-related peptide); Proxenin]				1.18434	0.00474498	Up
Q8CIG3	Kdm1b Aof1 Lsd2	Lysine-specific histone demethylase 1B (EC 1.14.99.66) (Flavin-containing amine oxidase domain-containing protein 1) (Lysine-specific histone demethylase 2)				1.43548	0.00848618	Up
Q8CIH5	Plcg2	1-phosphatidylinositol 4,5-bisphosphate phosphodiesterase gamma-2 (EC 3.1.4.11) (Phosphoinositide phospholipase C-gamma-2) (Phospholipase C-gamma-2) (PLC-gamma-2)	1.11166	0.00810168	Up	1.13838	0.00810168	Up
Q8CII2	Cdc123	Cell division cycle protein 123 homolog				1.15098	0.00568665	Up
Q8CIM8	Ints4	Integrator complex subunit 4 (Int4)				1.20829	0.0124452	Up
Q8JZK9	Hmgcs1	Hydroxymethylglutaryl-CoA synthase, cytoplasmic (HMG-CoA synthase) (EC 2.3.3.10) (3-hydroxy-3-methylglutaryl coenzyme A synthase)	0.689619	8.16465e-05	Down	0.865023	8.16465e-05	Down
Q8JZM7	Cdc73	Parafibromin (Cell division cycle protein 73 homolog) (Hyperparathyroidism 2 protein homolog)				1.25637	8.55958e-05	Up
Q8JZN5	Acad9	Complex I assembly factor ACAD9, mitochondrial (Acyl-CoA dehydrogenase family member 9) (ACAD-9) (EC 1.3.8.-)	0.780782	0.00476592	Down
Q8JZQ9	Eif3b Eif3s9	Eukaryotic translation initiation factor 3 subunit B (eIF3b) (Eukaryotic translation initiation factor 3 subunit 9) (eIF-3-eta) (eIF3 p116)	0.946916	0.0133911	Down
Q8JZS9	Mrpl48	39S ribosomal protein L48, mitochondrial (L48mt) (MRP-L48)	0.91307	0.00474245	Down	0.864115	0.00474245	Down
Q8K009	Aldh1l2	Mitochondrial 10-formyltetrahydrofolate dehydrogenase (Mitochondrial 10-FTHFDH) (mtFDH) (EC 1.5.1.6) (Aldehyde dehydrogenase family 1 member L2)				0.727522	5.36652e-05	Down
Q8K0D5	Gfm1 Efg Efg1 Gfm	Elongation factor G, mitochondrial (EF-Gmt) (Elongation factor G 1, mitochondrial) (mEF-G 1) (Elongation factor G1)				0.772237	5.92432e-05	Down
Q8K0Q5	Arhgap18	Rho GTPase-activating protein 18 (Rho-type GTPase-activating protein 18)	1.33679	0.00237927	Up	1.35908	0.00237927	Up
Q8K0V4	Cnot3 Not3	CCR4-NOT transcription complex subunit 3 (CCR4-associated factor 3)				1.10175	0.0210969	Up
Q8K0Z7	Taco1 Ccdc44	Translational activator of cytochrome c oxidase 1 (Coiled-coil domain-containing protein 44) (Translational activator of mitochondrially-encoded cytochrome c oxidase 1)				0.636541	0.00170335	Down
Q8K124	Plekho2 Plekhq1	Pleckstrin homology domain-containing family O member 2 (PH domain-containing family O member 2) (Pleckstrin homology domain-containing family Q member 1) (PH domain-containing family Q member 1)	0.844628	0.000634796	Down	0.867468	0.000634796	Down
Q8K157	Galm	Galactose mutarotase (EC 5.1.3.3) (Aldose 1-epimerase)	1.19089	0.0385015	Up
Q8K1A6	Cc2d1a	Coiled-coil and C2 domain-containing protein 1A (Five prime repressor element under dual repression-binding protein 1) (FRE under dual repression-binding protein 1) (Freud-1)				1.21633	0.0100873	Up
Q8K1E0	Stx5 Stx5a	Syntaxin-5	1.5585	0.000305838	Up	1.71129	0.000305838	Up
Q8K1E6	Alkbh3 Abh3	Alpha-ketoglutarate-dependent dioxygenase alkB homolog 3 (EC 1.14.11.54) (Alkylated DNA repair protein alkB homolog 3) (mAbh3)				1.09276	0.00167852	Up
Q8K1H1	Tdrd7 Pctaire2bp	Tudor domain-containing protein 7 (PCTAIRE2-binding protein) (Tudor repeat associator with PCTAIRE-2) (Trap)	0.736509	0.0218038	Down	0.766003	0.0218038	Down
Q8K1J6	Trnt1	CCA tRNA nucleotidyltransferase 1, mitochondrial (EC 2.7.7.72) (mitochondrial tRNA nucleotidyl transferase, CCA-adding) (mt CCA-adding enzyme) (mt tRNA CCA-diphosphorylase) (mt tRNA CCA-pyrophosphorylase) (mt tRNA adenylyltransferase)	0.904533	0.04248	Down	0.917082	0.04248	Down
Q8K1M6	Dnm1l Drp1	Dynamin-1-like protein (EC 3.6.5.5) (Dynamin family member proline-rich carboxyl-terminal domain less) (Dymple) (Dynamin-related protein 1)				1.06293	0.00381611	Up
Q8K1N4	Spats2 Scr59	Spermatogenesis-associated serine-rich protein 2 (Serine-rich spermatocytes and round spermatid 59 kDa protein) (p59scr)				1.11421	0.00767524	Up
Q8K1R3	Pnpt1 Pnpase	Polyribonucleotide nucleotidyltransferase 1, mitochondrial (EC 2.7.7.8) (3'-5' RNA exonuclease OLD35) (PNPase old-35) (Polynucleotide phosphorylase 1) (PNPase 1) (Polynucleotide phosphorylase-like protein)	0.901084	0.000160248	Down	0.759271	0.000160248	Down
Q8K1R7	Nek9 Nercc	Serine/threonine-protein kinase Nek9 (EC 2.7.11.1) (Nercc1 kinase) (Never in mitosis A-related kinase 9) (NimA-related protein kinase 9)				1.23422	0.0130611	Up
Q8K1X1	Wdr11 Brwd2 Kiaa1351	WD repeat-containing protein 11 (Bromodomain and WD repeat-containing protein 2)				1.18948	0.0410038	Up
Q8K201	Kct2	Keratinocyte-associated transmembrane protein 2	0.708819	0.0156561	Down	0.741307	0.0156561	Down
Q8K202	Polr1e Paf53 Praf1	DNA-directed RNA polymerase I subunit RPA49 (RNA polymerase I subunit A49) (DNA-directed RNA polymerase I subunit E) (RNA polymerase I-associated factor 1) (RNA polymerase I-associated factor 53)				1.12095	0.00292653	Up
Q8K212	Pacs1	Phosphofurin acidic cluster sorting protein 1 (PACS-1)	1.2874	0.0144614	Up	1.46816	0.0144614	Up
Q8K224	Nat10 Kiaa1709	RNA cytidine acetyltransferase (EC 2.3.1.-) (18S rRNA cytosine acetyltransferase) (N-acetyltransferase 10)				1.06606	0.023833	Up
Q8K268	Abcf3	ATP-binding cassette sub-family F member 3	1.05999	5.42211e-06	Up	1.30189	5.42211e-06	Up
Q8K284	Gtf3c1	General transcription factor 3C polypeptide 1 (TF3C-alpha) (TFIIIC box B-binding subunit) (Transcription factor IIIC 220 kDa subunit) (TFIIIC 220 kDa subunit) (TFIIIC220) (Transcription factor IIIC subunit alpha)				1.23133	0.0436157	Up
Q8K2B3	Sdha	Succinate dehydrogenase [ubiquinone] flavoprotein subunit, mitochondrial (EC 1.3.5.1) (Flavoprotein subunit of complex II) (Fp)	0.906561	0.000125677	Down	0.659534	0.000125677	Down
Q8K2D6	Dctd	Deoxycytidylate deaminase (EC 3.5.4.12) (dCMP deaminase)				1.26747	0.00177423	Up
Q8K2F8	Lsm14a Fam61a Rap55a	Protein LSM14 homolog A (Protein FAM61A) (RNA-associated protein 55A) (mRAP55A)	0.954788	0.0447049	Down
Q8K2I9	Fbh1 Fbx18 Fbxo18	F-box DNA helicase 1 (EC 3.6.4.12) (F-box only protein 18)				1.54458	0.00312884	Up
Q8K2Q9	Shtn1 Kiaa1598	Shootin-1 (Shootin1)	1.12021	0.000377101	Up	1.19759	0.000377101	Up
Q8K2T1	Nmral1	NmrA-like family domain-containing protein 1	1.15436	8.15936e-05	Up	1.3242	8.15936e-05	Up
Q8K2T8	Paf1	RNA polymerase II-associated factor 1 homolog				1.30862	0.000163633	Up
Q8K2V6	Ipo11 Ranbp11	Importin-11 (Imp11) (Ran-binding protein 11) (RanBP11)	1.22014	0.00521075	Up	1.46222	0.00521075	Up
Q8K2Y0	Obi1 Rnf219	ORC ubiquitin ligase 1 (OBI1) (EC 2.3.2.27) (RING finger protein 219)				1.25643	0.00890574	Up
Q8K2Y7	Mrpl47	39S ribosomal protein L47, mitochondrial (L47mt) (MRP-L47)	0.836114	0.000192425	Down	0.62749	0.000192425	Down
Q8K2Z2	Prpf39	Pre-mRNA-processing factor 39 (PRP39 homolog)				1.09327	0.00774091	Up
Q8K2Z4	Ncapd2 Capd2 Cnap1 Kiaa0159	Condensin complex subunit 1 (Chromosome condensation-related SMC-associated protein 1) (Chromosome-associated protein D2) (mCAP-D2) (Non-SMC condensin I complex subunit D2) (XCAP-D2 homolog)	1.16842	0.000140487	Up	1.43204	0.000140487	Up
Q8K301	Ddx52 Rok1	Probable ATP-dependent RNA helicase DDX52 (EC 3.6.4.13) (ATP-dependent RNA helicase ROK1-like) (DEAD box protein 52)				1.30279	0.0414757	Up
Q8K310	Matr3	Matrin-3				1.1478	0.00194413	Up
Q8K327	Champ1 D8Ertd457e Kiaa1802 Zfp828 Znf828	Chromosome alignment-maintaining phosphoprotein 1 (Zinc finger protein 828)				1.38324	0.0243467	Up
Q8K368	Fanci	Fanconi anemia group I protein homolog (Protein FACI)	1.19531	0.00356584	Up	1.36044	0.00356584	Up
Q8K370	Acad10	Acyl-CoA dehydrogenase family member 10 (ACAD-10) (EC 1.3.99.-)				0.649837	0.00210958	Down
Q8K382	Dennd1a	DENN domain-containing protein 1A (Connecdenn 1) (Connecdenn)				1.24399	0.0226751	Up
Q8K3A0	Hscb Hsc20	Iron-sulfur cluster co-chaperone protein HscB [Cleaved into: Iron-sulfur cluster co-chaperone protein HscB, mitochondrial (C-HSC20); Iron-sulfur cluster co-chaperone protein HscB, cytoplasmic]				0.885429	0.0113891	Down
Q8K3D3	Swi5 Sae3	DNA repair protein SWI5 homolog (Protein SAE3 homolog)	0.951529	8.9483e-05	Down	1.16375	8.9483e-05	Up
Q8K3G9	Appl2 Dip13b Dip3b	DCC-interacting protein 13-beta (Dip13-beta) (Adapter protein containing PH domain, PTB domain and leucine zipper motif 2)	1.22284	0.0113643	Up	1.31896	0.0113643	Up
Q8K3W0	Babam2 Bre	BRISC and BRCA1-A complex member 2 (BRCA1-A complex subunit BRE) (BRCA1/BRCA2-containing complex subunit 45) (Brain and reproductive organ-expressed protein)	1.15498	0.0024278	Up	1.30093	0.0024278	Up
Q8K3X4	Irf2bpl Eap1 Kiaa1865	Probable E3 ubiquitin-protein ligase IRF2BPL (EC 2.3.2.27) (Enhanced at puberty protein 1) (Interferon regulatory factor 2-binding protein-like)	0.875002	0.0016806	Down	0.802207	0.0016806	Down
Q8K400	Stxbp5 Kiaa4253 Llgl3	Syntaxin-binding protein 5 (Lethal(2) giant larvae protein homolog 3) (Tomosyn-1)	1.1117	0.0028787	Up	1.17543	0.0028787	Up
Q8K411	Pitrm1 Kiaa1104 Ntup1	Presequence protease, mitochondrial (EC 3.4.24.-) (Pitrilysin metalloproteinase 1)				0.769536	0.00450572	Down
Q8K4B0	Mta1	Metastasis-associated protein MTA1	1.28001	0.0477915	Up
Q8K4B2	Irak3	Interleukin-1 receptor-associated kinase 3 (IRAK-3) (IL-1 receptor-associated kinase M) (IRAK-M) (Inactive IL-1 receptor-associated kinase 3)	0.805233	0.0112946	Down	0.689965	0.0112946	Down
Q8K4I3	Arhgef6	Rho guanine nucleotide exchange factor 6 (Alpha-PIX) (Rac/Cdc42 guanine nucleotide exchange factor 6)	1.23619	0.000129152	Up	1.45657	0.000129152	Up
Q8K4R9	Dlgap5 Dlg7 Kiaa0008	Disks large-associated protein 5 (DAP-5) (Discs large homolog 7) (Disks large-associated protein DLG7) (Hepatoma up-regulated protein homolog) (HURP)	1.22893	0.0213981	Up	1.27547	0.0213981	Up
Q8K4Z3	Naxe Aibp Apoa1bp	NAD(P)H-hydrate epimerase (EC 5.1.99.6) (Apolipoprotein A-I-binding protein) (AI-BP) (NAD(P)HX epimerase)				0.852472	0.024618	Down
Q8K4Z5	Sf3a1	Splicing factor 3A subunit 1 (SF3a120)				0.826957	0.00148167	Down
Q8N7N5	Dcaf8 D1Ucla4 H326 Wdr42a	DDB1- and CUL4-associated factor 8 (WD repeat-containing protein 42A)	1.09886	0.0131622	Up	1.13798	0.0131622	Up
Q8N9S3	Ahsa2	Activator of 90 kDa heat shock protein ATPase homolog 2	0.713133	0.00209496	Down
Q8QZS1	Hibch	3-hydroxyisobutyryl-CoA hydrolase, mitochondrial (EC 3.1.2.4) (3-hydroxyisobutyryl-coenzyme A hydrolase) (HIB-CoA hydrolase) (HIBYL-CoA-H)				0.766135	0.00324477	Down
Q8QZT1	Acat1	Acetyl-CoA acetyltransferase, mitochondrial (EC 2.3.1.9) (Acetoacetyl-CoA thiolase)				0.762168	0.00158226	Down
Q8QZX2	Haus3	HAUS augmin-like complex subunit 3				1.43325	0.00121824	Up
Q8R001	Mapre2	Microtubule-associated protein RP/EB family member 2 (APC-binding protein EB2) (End-binding protein 2) (EB2)	0.789938	0.00570117	Down
Q8R010	Aimp2 Jtv1	Aminoacyl tRNA synthase complex-interacting multifunctional protein 2 (Multisynthase complex auxiliary component p38) (Protein JTV-1)				1.16557	0.00783835	Up
Q8R060	Zwilch	Protein zwilch homolog				1.38383	0.0236653	Up
Q8R0A7	Kiaa0513	Uncharacterized protein KIAA0513	1.33592	0.00236189	Up	1.47377	0.00236189	Up
Q8R0G9	Nup133	Nuclear pore complex protein Nup133 (133 kDa nucleoporin) (Nucleoporin Nup133)	1.08744	0.00177083	Up	1.13456	0.00177083	Up
Q8R0K4	Ccdc137	Coiled-coil domain-containing protein 137				0.819119	0.0410038	Down
Q8R0X2	Cacul1	CDK2-associated and cullin domain-containing protein 1				1.21271	0.0316842	Up
Q8R0Y6	Aldh1l1 Fthfd	Cytosolic 10-formyltetrahydrofolate dehydrogenase (10-FTHFDH) (FDH) (EC 1.5.1.6) (Aldehyde dehydrogenase family 1 member L1)				0.733184	0.0316801	Down
Q8R151	Znfx1	NFX1-type zinc finger-containing protein 1	0.685954	0.0172623	Down
Q8R164	Bphl	Valacyclovir hydrolase (VACVase) (Valacyclovirase) (EC 3.1.-.-) (Biphenyl hydrolase-like protein)	1.07194	0.00499636	Up	0.926147	0.00499636	Down
Q8R180	Ero1a Ero1l	ERO1-like protein alpha (ERO1-L) (ERO1-L-alpha) (EC 1.8.4.-) (Endoplasmic reticulum oxidoreductase alpha) (Endoplasmic reticulum oxidoreductin-1-like protein) (Oxidoreductin-1-L-alpha)				0.806229	0.000214098	Down
Q8R1A4	Dock7 Gm430 Kiaa1771 Mnlt	Dedicator of cytokinesis protein 7 (Protein moonlight)				1.28795	0.00114397	Up
Q8R1F1	Niban2 Fam129b	Protein Niban 2 (Meg-3) (Niban-like protein 1) (Protein FAM129B)	0.872435	5.06245e-05	Down	0.780723	5.06245e-05	Down
Q8R1G6	Pdlim2	PDZ and LIM domain protein 2 (PDZ-LIM protein mystique)	1.04447	0.000140487	Up	0.846925	0.000140487	Down
Q8R1I1	Uqcr10	Cytochrome b-c1 complex subunit 9 (Complex III subunit 9) (Complex III subunit X) (Cytochrome c1 non-heme 7 kDa protein) (Ubiquinol-cytochrome c reductase complex 7.2 kDa protein)				0.679114	0.0136921	Down
Q8R2E9	Ero1b Ero1lb	ERO1-like protein beta (ERO1-L-beta) (EC 1.8.4.-) (Endoplasmic reticulum oxidoreductase beta) (Endoplasmic reticulum oxidoreductin-1-like protein B) (Oxidoreductin-1-L-beta)				0.79093	0.00159289	Down
Q8R2M2	Dnttip2	Deoxynucleotidyltransferase terminal-interacting protein 2	1.16043	0.000763297	Up	1.25879	0.000763297	Up
Q8R2N0	Ccdc59 D10Ertd718e Tap26	Thyroid transcription factor 1-associated protein 26 (TTF-1-associated protein 26) (Coiled-coil domain-containing protein 59)				1.39858	0.022497	Up
Q8R2Q8	Bst2	Bone marrow stromal antigen 2 (BST-2) (HM1.24 antigen) (CD antigen CD317)	0.752799	2.24615e-06	Down	0.577141	2.24615e-06	Down
Q8R2T8	Gtf3c5	General transcription factor 3C polypeptide 5 (TF3C-epsilon) (Transcription factor IIIC 63 kDa subunit) (TFIIIC 63 kDa subunit) (TFIIIC63) (Transcription factor IIIC subunit epsilon)	1.13735	8.9483e-05	Up	1.37658	8.9483e-05	Up
Q8R2U4	Ntmt1 Mettl11a	N-terminal Xaa-Pro-Lys N-methyltransferase 1 (EC 2.1.1.244) (Alpha N-terminal protein methyltransferase 1A) (Methyltransferase-like protein 11A) (X-Pro-Lys N-terminal protein methyltransferase 1A) (NTM1A) [Cleaved into: N-terminal Xaa-Pro-Lys N-methyltransferase 1, N-terminally processed]	0.842927	0.00462369	Down	0.789247	0.00462369	Down
Q8R2Y8	Ptrh2 Pth2	Peptidyl-tRNA hydrolase 2, mitochondrial (PTH 2) (EC 3.1.1.29)	1.53955	4.39047e-05	Up	1.56575	4.39047e-05	Up
Q8R323	Rfc3	Replication factor C subunit 3 (Activator 1 38 kDa subunit) (A1 38 kDa subunit) (Activator 1 subunit 3) (Replication factor C 38 kDa subunit) (RF-C 38 kDa subunit) (RFC38)	1.12159	0.000358343	Up	1.26836	0.000358343	Up
Q8R332	Nup58 Nupl1	Nucleoporin p58/p45 (58 kDa nucleoporin) (Nucleoporin-like protein 1)				0.897225	0.0175518	Down
Q8R349	Cdc16 Anapc6	Cell division cycle protein 16 homolog (Anaphase-promoting complex subunit 6) (APC6) (Cyclosome subunit 6)				1.18912	0.00861877	Up
Q8R3C0	Mcmbp	Mini-chromosome maintenance complex-binding protein (MCM-BP) (MCM-binding protein)	0.951012	0.00182843	Down	1.07881	0.00182843	Up
Q8R3C6	Rbm19	Probable RNA-binding protein 19 (RNA-binding motif protein 19)				1.28551	0.00327791	Up
Q8R3G1	Ppp1r8 Nipp1	Nuclear inhibitor of protein phosphatase 1 (NIPP-1) (Protein phosphatase 1 regulatory inhibitor subunit 8)	1.07475	0.028504	Up	1.08644	0.028504	Up
Q8R3J4	Mterf3 Mterfd1 CGI-12	Transcription termination factor 3, mitochondrial (Mitochondrial transcription termination factor 3) (mTERF3) (mTERF domain-containing protein 1, mitochondrial)	1.32432	0.000560864	Up	1.37356	0.000560864	Up
Q8R3N6	Thoc1 Hpr1	THO complex subunit 1 (Tho1) (Nuclear matrix protein p84)				0.879728	0.0380948	Down
Q8R3Q6	Mix23 Ccdc58	Protein MIX23 (Coiled-coil domain-containing protein 58)				0.638405	0.000256812	Down
Q8R3S6	Exoc1 Sec3 Sec3l1	Exocyst complex component 1 (Exocyst complex component Sec3)	1.14996	0.00199821	Up	1.25793	0.00199821	Up
Q8R418	Dicer1 Dicer Mdcr	Endoribonuclease Dicer (EC 3.1.26.3) (Double-strand-specific ribonuclease mDCR-1)				1.17894	0.0119684	Up
Q8R4B8	Nlrp3 Cias1 Mmig1 Nalp3 Pypaf1	NACHT, LRR and PYD domains-containing protein 3 (Cold autoinflammatory syndrome 1 protein homolog) (Cryopyrin) (Mast cell maturation-associated-inducible protein 1) (PYRIN-containing APAF1-like protein 1)	0.664248	4.68913e-05	Down	0.854552	4.68913e-05	Down
Q8R4X3	Rbm12	RNA-binding protein 12 (RNA-binding motif protein 12) (SH3/WW domain anchor protein in the nucleus) (SWAN)				1.26754	0.000143618	Up
Q8R550	Sh3kbp1 Ruk Seta	SH3 domain-containing kinase-binding protein 1 (Regulator of ubiquitous kinase) (Ruk) (SH3-containing, expressed in tumorigenic astrocytes)				0.851285	0.00932557	Down
Q8R570	Snap47	Synaptosomal-associated protein 47 (SNAP-47) (Synaptosomal-associated 47 kDa protein)	1.04288	0.00683767	Up	1.06279	0.00683767	Up
Q8R5A0	Smyd2	N-lysine methyltransferase SMYD2 (EC 2.1.1.-) (Histone methyltransferase SMYD2) (EC 2.1.1.354) (SET and MYND domain-containing protein 2)				1.43262	0.00184014	Up
Q8R5A3	Apbb1ip Prel1	Amyloid beta A4 precursor protein-binding family B member 1-interacting protein (APBB1-interacting protein 1) (Proline-rich EVH1 ligand 1) (PREL-1) (Proline-rich protein 48)	0.755908	0.000189945	Down	0.842459	0.000189945	Down
Q8R5F7	Ifih1	Interferon-induced helicase C domain-containing protein 1 (EC 3.6.4.13) (Helicase with 2 CARD domains) (Helicard) (Interferon induced with helicase C domain protein 1) (Melanoma differentiation-associated protein 5) (MDA-5) (RIG-I-like receptor 2) (RLR-2)	0.697484	0.00203813	Down	0.745895	0.00203813	Down
Q8R5G7	Arap3 Centd3 Drag1 Kiaa4097	Arf-GAP with Rho-GAP domain, ANK repeat and PH domain-containing protein 3 (Centaurin-delta-3) (Cnt-d3) (Dual specificity Rho- and Arf-GTPase-activating protein 1)	1.22845	0.0128445	Up	1.16206	0.0128445	Up
Q8R5H1	Usp15 Kiaa0529	Ubiquitin carboxyl-terminal hydrolase 15 (EC 3.4.19.12) (Deubiquitinating enzyme 15) (Ubiquitin thioesterase 15) (Ubiquitin-specific-processing protease 15)				1.10463	0.00681395	Up
Q8VBT6	Apobr Apob48r	Apolipoprotein B receptor (Apolipoprotein B-100 receptor) (Apolipoprotein B48 receptor) (apoB-48R)	0.885341	0.00711424	Down	0.883704	0.00711424	Down
Q8VC03	Eml3	Echinoderm microtubule-associated protein-like 3 (EMAP-3)				1.31603	0.0283865	Up
Q8VC16	Lrrc14 Kiaa0014	Leucine-rich repeat-containing protein 14	1.20359	0.00330007	Up	1.28053	0.00330007	Up
Q8VC19	Alas1	5-aminolevulinate synthase, nonspecific, mitochondrial (ALAS-H) (EC 2.3.1.37) (5-aminolevulinic acid synthase 1) (Delta-ALA synthase 1) (Delta-aminolevulinate synthase 1)	0.814343	0.000202596	Down	0.646763	0.000202596	Down
Q8VC34	Rpap2	Putative RNA polymerase II subunit B1 CTD phosphatase Rpap2 (EC 3.1.3.16) (RNA polymerase II-associated protein 2)				1.45231	0.00529298	Up
Q8VCN5	Cth	Cystathionine gamma-lyase (EC 4.4.1.1) (Cysteine-protein sulfhydrase) (Gamma-cystathionase)				0.817726	0.0309748	Down
Q8VCN9	Tbcc	Tubulin-specific chaperone C (Tubulin-folding cofactor C) (CFC)	1.05512	0.000504434	Up	1.1151	0.000504434	Up
Q8VD04	Gripap1 DXImx47e Kiaa1167	GRIP1-associated protein 1 (GRASP-1) (HCMV-interacting protein) [Cleaved into: GRASP-1 C-terminal chain (30kDa C-terminus form)]	0.921919	0.00292653	Down
Q8VD65	Pik3r4 Vps15	Phosphoinositide 3-kinase regulatory subunit 4 (PI3-kinase regulatory subunit 4) (EC 2.7.11.1)				1.23551	0.00861877	Up
Q8VDC1	Fyco1	FYVE and coiled-coil domain-containing protein 1	0.847341	0.00716989	Down	0.73023	0.00716989	Down
Q8VDD5	Myh9	Myosin-9 (Cellular myosin heavy chain, type A) (Myosin heavy chain 9) (Myosin heavy chain, non-muscle IIa) (Non-muscle myosin heavy chain A) (NMMHC-A) (Non-muscle myosin heavy chain IIa) (NMMHC II-a) (NMMHC-IIA)	0.951028	3.04631e-05	Down	0.787461	3.04631e-05	Down
Q8VDG3	Parn	Poly(A)-specific ribonuclease PARN (EC 3.1.13.4) (Polyadenylate-specific ribonuclease)				1.24392	0.0242842	Up
Q8VDG7	Pafah2	Platelet-activating factor acetylhydrolase 2, cytoplasmic (EC 3.1.1.47) (PAF:lysophospholipid transacetylase) (PAF:sphingosine transacetylase) (Platelet-activating factor acetyltransferase PAFAH2) (EC 2.3.1.149) (Serine-dependent phospholipase A2) (SD-PLA2)				0.826594	0.00938526	Down
Q8VDI1	Epsti1	Epithelial-stromal interaction protein 1	0.588429	0.00222357	Down	0.67245	0.00222357	Down
Q8VDJ3	Hdlbp	Vigilin (High density lipoprotein-binding protein) (HDL-binding protein)	0.951566	9.29633e-05	Down	1.09028	9.29633e-05	Up
Q8VDM4	Psmd2	26S proteasome non-ATPase regulatory subunit 2 (26S proteasome regulatory subunit RPN1) (26S proteasome regulatory subunit S2) (26S proteasome subunit p97)	0.925556	0.000697656	Down	0.841947	0.000697656	Down
Q8VDM6	Hnrnpul1 Hnrpul1	Heterogeneous nuclear ribonucleoprotein U-like protein 1	1.14693	0.0006149	Up	1.25732	0.0006149	Up
Q8VDN2	Atp1a1	Sodium/potassium-transporting ATPase subunit alpha-1 (Na(+)/K(+) ATPase alpha-1 subunit) (EC 7.2.2.13) (Sodium pump subunit alpha-1)				0.735187	0.000982889	Down
Q8VDQ9	Kri1	Protein KRI1 homolog	1.25322	0.00260734	Up	1.59028	0.00260734	Up
Q8VDV8	Mitd1	MIT domain-containing protein 1				0.716714	0.0212429	Down
Q8VE10	Naa40 Nat11 Patt1	N-alpha-acetyltransferase 40 (EC 2.3.1.257) (N-acetyltransferase 11) (N-alpha-acetyltransferase D) (NatD) (Protein acetyltransferase 1)	1.39275	0.0291344	Up	1.36492	0.0291344	Up
Q8VE99	Ccdc115	Coiled-coil domain-containing protein 115 (Coiled-coil protein 1) (Ccp1)	1.1407	0.000697656	Up	1.26389	0.000697656	Up
Q8VEA4	Chchd4 Mia40	Mitochondrial intermembrane space import and assembly protein 40 (Coiled-coil-helix-coiled-coil-helix domain-containing protein 4)	0.848276	0.00070308	Down	0.712496	0.00070308	Down
Q8VEB4	Pla2g15 Lypla3	Phospholipase A2 group XV (1-O-acylceramide synthase) (ACS) (LCAT-like lysophospholipase) (LLPL) (EC 3.1.1.5) (Lysophospholipase 3) (Lysosomal phospholipase A and acyltransferase) (EC 2.3.1.-) (EC 3.1.1.32) (EC 3.1.1.4) (Lysosomal phospholipase A2) (LPLA2)				1.25963	0.00299223	Up
Q8VED2	Bloc1s4 Cno	Biogenesis of lysosome-related organelles complex 1 subunit 4 (BLOC-1 subunit 4) (Protein cappuccino homolog)				1.15806	0.0161391	Up
Q8VED5	Krt79 Kb38	Keratin, type II cytoskeletal 79 (Cytokeratin-79) (CK-79) (Keratin-79) (K79) (Type-II keratin Kb38)				0.636136	0.00216459	Down
Q8VEE0	Rpe	Ribulose-phosphate 3-epimerase (EC 5.1.3.1) (Ribulose-5-phosphate-epimerase)	0.925106	0.00204391	Down	0.846376	0.00204391	Down
Q8VEE4	Rpa1	Replication protein A 70 kDa DNA-binding subunit (RP-A p70) (Replication factor A protein 1) (RF-A protein 1)	1.23937	0.012331	Up	1.33636	0.012331	Up
Q8VEH3	Arl8a Arl10b Gie2	ADP-ribosylation factor-like protein 8A (ADP-ribosylation factor-like protein 10B) (Novel small G protein indispensable for equal chromosome segregation 2)	0.817111	3.14287e-05	Down	0.621406	3.14287e-05	Down
Q8VEH6	Cbwd1	COBW domain-containing protein 1 (Cobalamin synthase W domain-containing protein 1)	0.844305	0.0305714	Down	0.848671	0.0305714	Down
Q8VEJ9	Vps4a	Vacuolar protein sorting-associated protein 4A (EC 3.6.4.6)	1.27004	0.00724164	Up	1.39623	0.00724164	Up
Q8VEL2	Mtmr14	Myotubularin-related protein 14 (EC 3.1.3.-) (mJumpy)	0.837661	0.000275438	Down
Q8VH51	Rbm39 Caper Rnpc2	RNA-binding protein 39 (Coactivator of activating protein 1 and estrogen receptors) (Coactivator of AP-1 and ERs) (RNA-binding motif protein 39) (RNA-binding region-containing protein 2)				1.08184	0.00851064	Up
Q8VHI3	Pofut2	GDP-fucose protein O-fucosyltransferase 2 (EC 2.4.1.221) (Peptide-O-fucosyltransferase 2) (O-FucT-2)				0.792705	0.00461848	Down
Q8VHK9	Dhx36 Ddx36 Kiaa1488 Mlel1	ATP-dependent DNA/RNA helicase DHX36 (EC 3.6.4.13) (DEAD/H box polypeptide 36) (DEAH box protein 36) (MLE-like protein 1) (RNA helicase associated with AU-rich element ARE)				1.27717	0.0124092	Up
Q8VHX6	Flnc Abpl Fln2	Filamin-C (FLN-C) (ABP-280-like protein) (ABP-L) (Actin-binding-like protein) (Filamin-2) (Gamma-filamin)	0.908786	0.000913431	Down	0.833878	0.000913431	Down
Q8VHZ7	Imp4 D1Wsu40e	U3 small nucleolar ribonucleoprotein protein IMP4 (U3 snoRNP protein IMP4)				1.62062	0.0135169	Up
Q8VI36	Pxn	Paxillin				0.88481	0.0195631	Down
Q8VI63	Mob2 Mmh	MOB kinase activator 2 (Mob2 homolog) (Mps one binder kinase activator-like 2) (Ovary-specific MOB-like protein)				1.42862	0.0147061	Up
Q8VI93	Oas3 oasl10	2'-5'-oligoadenylate synthase 3 ((2-5')oligo(A) synthase 3) (2-5A synthase 3) (EC 2.7.7.84) (2',5'-oligoadenylate synthetase-like 10)	0.814756	0.000470007	Down	0.734625	0.000470007	Down
Q8VI94	Oasl1 oasl9	2'-5'-oligoadenylate synthase-like protein 1 (2',5'-oligoadenylate synthetase-like 9)	0.741399	0.00022992	Down	0.662756	0.00022992	Down
Q8VIJ6	Sfpq Psf	Splicing factor, proline- and glutamine-rich (DNA-binding p52/p100 complex, 100 kDa subunit) (Polypyrimidine tract-binding protein-associated-splicing factor) (PSF) (PTB-associated-splicing factor)	1.06774	0.000777229	Up	0.888487	0.000777229	Down
Q8WTY4	Ciapin1	Anamorsin (Cytokine-induced apoptosis inhibitor 1) (Fe-S cluster assembly protein DRE2 homolog)				1.18217	0.00154286	Up
Q8WUR0		Protein C19orf12 homolog				1.09642	0.0329313	Up
Q91UZ5	Impa2	Inositol monophosphatase 2 (IMP 2) (IMPase 2) (EC 3.1.3.25) (Inositol-1(or 4)-monophosphatase 2) (Myo-inositol monophosphatase A2)	1.29653	0.00108119	Up	1.30617	0.00108119	Up
Q91V12	Acot7 Bach	Cytosolic acyl coenzyme A thioester hydrolase (EC 3.1.2.2) (Acyl-CoA thioesterase 7) (Brain acyl-CoA hydrolase) (BACH) (CTE-IIa) (CTE-II) (Long chain acyl-CoA thioester hydrolase)	0.932992	0.000271112	Down	0.761408	0.000271112	Down
Q91V92	Acly	ATP-citrate synthase (EC 2.3.3.8) (ATP-citrate (pro-S-)-lyase) (Citrate cleavage enzyme)				0.943797	0.0177345	Down
Q91VB4	Hps3 Coa	Hermansky-Pudlak syndrome 3 protein homolog (Cocoa protein)				1.3861	0.00717778	Up
Q91VC3	Eif4a3 Ddx48	Eukaryotic initiation factor 4A-III (eIF-4A-III) (eIF4A-III) (EC 3.6.4.13) (ATP-dependent RNA helicase DDX48) (ATP-dependent RNA helicase eIF4A-3) (DEAD box protein 48) (Eukaryotic translation initiation factor 4A isoform 3) [Cleaved into: Eukaryotic initiation factor 4A-III, N-terminally processed]				1.11967	0.00474498	Up
Q91VD9	Ndufs1	NADH-ubiquinone oxidoreductase 75 kDa subunit, mitochondrial (EC 7.1.1.2) (Complex I-75kD) (CI-75kD)	1.50404	4.04954e-05	Up	1.60359	4.04954e-05	Up
Q91VE6	Nifk Mki67ip	MKI67 FHA domain-interacting nucleolar phosphoprotein (Nucleolar protein interacting with the FHA domain of pKI-67) (mNIFK)				1.14891	0.00892837	Up
Q91VH2	Snx9	Sorting nexin-9	1.12229	0.00843585	Up	1.14519	0.00843585	Up
Q91VH6	Memo1	Protein MEMO1 (Mediator of ErbB2-driven cell motility 1) (Memo-1)	1.17814	0.0149699	Up	1.2229	0.0149699	Up
Q91VJ4	Stk38 Ndr1	Serine/threonine-protein kinase 38 (EC 2.7.11.1) (NDR1 protein kinase) (Nuclear Dbf2-related kinase 1)	1.24162	0.000203816	Up	1.4088	0.000203816	Up
Q91VK1	Bzw2	Basic leucine zipper and W2 domain-containing protein 2	1.11359	0.00499636	Up	1.19208	0.00499636	Up
Q91VM9	Ppa2	Inorganic pyrophosphatase 2, mitochondrial (EC 3.6.1.1) (Pyrophosphate phospho-hydrolase 2) (PPase 2)				0.886026	7.22533e-05	Down
Q91VN6	Ddx41	Probable ATP-dependent RNA helicase DDX41 (EC 3.6.4.13) (DEAD box protein 41)				1.32565	0.000362977	Up
Q91VR2	Atp5f1c Atp5c1	ATP synthase subunit gamma, mitochondrial (ATP synthase F1 subunit gamma) (F-ATPase gamma subunit)				0.703394	0.000345345	Down
Q91VR5	Ddx1	ATP-dependent RNA helicase DDX1 (EC 3.6.4.13) (DEAD box protein 1)				1.28222	0.000618047	Up
Q91VS8	Farp2 Kiaa0793	FERM, ARHGEF and pleckstrin domain-containing protein 2 (FERM domain including RhoGEF) (FIR) (FERM, RhoGEF and pleckstrin domain-containing protein 2)	1.36403	0.0309748	Up	1.27717	0.0309748	Up
Q91VU7	Pus7 Kiaa1897	Pseudouridylate synthase 7 homolog (EC 5.4.99.-)	1.1352	0.000674766	Up	1.23396	0.000674766	Up
Q91VW3	Sh3bgrl3	SH3 domain-binding glutamic acid-rich-like protein 3				0.924531	0.0176648	Down
Q91VW5	Golga4	Golgin subfamily A member 4 (tGolgin-1)	0.829147	0.0089561	Down	0.775405	0.0089561	Down
Q91W50	Csde1 D3Jfr1	Cold shock domain-containing protein E1	0.901474	2.97484e-05	Down	1.1633	2.97484e-05	Up
Q91W90	Txndc5 Tlp46	Thioredoxin domain-containing protein 5 (Endoplasmic reticulum resident protein 46) (ER protein 46) (ERp46) (Plasma cell-specific thioredoxin-related protein) (PC-TRP) (Thioredoxin-like protein p46)	1.09698	0.000681372	Up	1.19334	0.000681372	Up
Q91WD4		UPF0415 protein C7orf25 homolog				1.2211	0.00838909	Up
Q91WJ8	Fubp1 D3Ertd330e	Far upstream element-binding protein 1 (FBP) (FUSE-binding protein 1)	0.894295	0.000789081	Down	0.769624	0.000789081	Down
Q91WK5	Gcsh	Glycine cleavage system H protein, mitochondrial (Lipoic acid-containing protein)				0.751322	0.000519939	Down
Q91WM3	Rrp9 Rnu3ip2 U3-55k	U3 small nucleolar RNA-interacting protein 2 (RRP9 homolog) (U3 small nucleolar ribonucleoprotein-associated 55 kDa protein) (U3 snoRNP-associated 55 kDa protein) (U3-55K)	0.897464	6.11388e-05	Down	0.723891	6.11388e-05	Down
Q91WN1	Dnajc9	DnaJ homolog subfamily C member 9	1.16531	3.04631e-05	Up	1.38899	3.04631e-05	Up
Q91WS0	Cisd1 D10Ertd214e Zcd1	CDGSH iron-sulfur domain-containing protein 1 (MitoNEET)	1.22981	0.00372691	Up	1.23111	0.00372691	Up
Q91WT8	Rbm47	RNA-binding protein 47 (RNA-binding motif protein 47)				1.20064	0.0147475	Up
Q91X20	Ash2l	Set1/Ash2 histone methyltransferase complex subunit ASH2 (ASH2-like protein)				1.18201	0.00647313	Up
Q91XB0	Trex1	Three-prime repair exonuclease 1 (EC 3.1.11.2) (3'-5' exonuclease TREX1)	0.812818	1.27814e-05	Down	0.592472	1.27814e-05	Down
Q91XC8	Dap	Death-associated protein 1 (DAP-1)	1.05874	0.000357177	Up	0.935755	0.000357177	Down
Q91XD6	Vps36	Vacuolar protein-sorting-associated protein 36 (ESCRT-II complex subunit VPS36)				1.16768	0.0272531	Up
Q91XV3	Basp1 Nap22	Brain acid soluble protein 1 (22 kDa neuronal tissue-enriched acidic protein) (Neuronal axonal membrane protein NAP-22)				0.684057	9.32814e-05	Down
Q91YE6	Ipo9 Imp9 Ranbp9	Importin-9 (Imp9) (Importin-9a) (Imp9a) (Importin-9b) (Imp9b) (Ran-binding protein 9) (RanBP9)				1.20812	0.00126139	Up
Q91YI0	Asl	Argininosuccinate lyase (ASAL) (EC 4.3.2.1) (Arginosuccinase)				0.846969	0.00069061	Down
Q91YJ2	Snx4	Sorting nexin-4				1.27042	0.0245537	Up
Q91YN5	Uap1	UDP-N-acetylhexosamine pyrophosphorylase [Includes: UDP-N-acetylgalactosamine pyrophosphorylase (EC 2.7.7.83); UDP-N-acetylglucosamine pyrophosphorylase (EC 2.7.7.23)]	0.822169	0.0190904	Down	0.746945	0.0190904	Down
Q91YN9	Bag2	BAG family molecular chaperone regulator 2 (BAG-2) (Bcl-2-associated athanogene 2)	1.26876	3.29919e-05	Up	1.43183	3.29919e-05	Up
Q91YP0	L2hgdh	L-2-hydroxyglutarate dehydrogenase, mitochondrial (EC 1.1.99.2) (Duranin)				0.871844	0.0127142	Down
Q91YP3	Dera	Deoxyribose-phosphate aldolase (DERA) (EC 4.1.2.4) (2-deoxy-D-ribose 5-phosphate aldolase) (Phosphodeoxyriboaldolase) (Deoxyriboaldolase)	1.18865	0.0180801	Up	1.21121	0.0180801	Up
Q91YQ5	Rpn1	Dolichyl-diphosphooligosaccharide--protein glycosyltransferase subunit 1 (Dolichyl-diphosphooligosaccharide--protein glycosyltransferase 67 kDa subunit) (Ribophorin I) (RPN-I) (Ribophorin-1)				0.794415	0.0460981	Down
Q91YR1	Twf1 Ptk9	Twinfilin-1 (Protein A6)				0.888392	0.00959748	Down
Q91YR5	EEF1AKNMT Kiaa0859 Mettl13	eEF1A lysine and N-terminal methyltransferase (eEF1A-KNMT) (Methyltransferase-like protein 13) [Includes: eEF1A lysine methyltransferase (EC 2.1.1.-); eEF1A N-terminal methyltransferase (EC 2.1.1.-)]	1.11253	0.00853187	Up	1.20189	0.00853187	Up
Q91YR9	Ptgr1 Ltb4dh	Prostaglandin reductase 1 (PRG-1) (15-oxoprostaglandin 13-reductase) (EC 1.3.1.48) (Dithiolethione-inducible gene 1 protein) (D3T-inducible gene 1 protein) (DIG-1) (Leukotriene B4 12-hydroxydehydrogenase) (NAD(P)H-dependent alkenal/one oxidoreductase) (EC 1.3.1.74)	1.13243	0.010905	Up	1.17135	0.010905	Up
Q91YS8	Camk1	Calcium/calmodulin-dependent protein kinase type 1 (EC 2.7.11.17) (CaM kinase I) (CaM-KI) (CaM kinase I alpha) (CaMKI-alpha)	1.06961	0.00215443	Up	1.1167	0.00215443	Up
Q91YT0	Ndufv1	NADH dehydrogenase [ubiquinone] flavoprotein 1, mitochondrial (EC 7.1.1.2) (Complex I-51kD) (CI-51kD) (NADH-ubiquinone oxidoreductase 51 kDa subunit)				1.16786	0.0387737	Up
Q91YT7	Ythdf2	YTH domain-containing family protein 2	0.913868	0.00622933	Down	1.09031	0.00622933	Up
Q91YU8	Ppan Ssf1	Suppressor of SWI4 1 homolog (Ssf-1) (Peter Pan homolog)				0.821704	0.00626205	Down
Q91YW3	Dnajc3 P58ipk	DnaJ homolog subfamily C member 3 (Interferon-induced, double-stranded RNA-activated protein kinase inhibitor) (Protein kinase inhibitor of 58 kDa) (Protein kinase inhibitor p58)				1.12793	0.0161949	Up
Q91Z38	Ttc1	Tetratricopeptide repeat protein 1 (TPR repeat protein 1)				0.833401	0.00914178	Down
Q91Z53	Grhpr Glxr	Glyoxylate reductase/hydroxypyruvate reductase (EC 1.1.1.79) (EC 1.1.1.81)	1.14841	0.0240576	Up
Q91ZA3	Pcca	Propionyl-CoA carboxylase alpha chain, mitochondrial (PCCase subunit alpha) (EC 6.4.1.3) (Propanoyl-CoA:carbon dioxide ligase subunit alpha)				0.777896	0.0058192	Down
Q91ZE0	Tmlhe Tmlh	Trimethyllysine dioxygenase, mitochondrial (EC 1.14.11.8) (Epsilon-trimethyllysine 2-oxoglutarate dioxygenase) (TML hydroxylase) (TML-alpha-ketoglutarate dioxygenase) (TML dioxygenase) (TMLD)				0.773973	0.0342682	Down
Q91ZW3	Smarca5 Snf2h	SWI/SNF-related matrix-associated actin-dependent regulator of chromatin subfamily A member 5 (EC 3.6.4.-) (Sucrose nonfermenting protein 2 homolog) (mSnf2h)				0.779776	0.037575	Down
Q91ZX7	Lrp1 A2mr	Prolow-density lipoprotein receptor-related protein 1 (LRP-1) (Alpha-2-macroglobulin receptor) (A2MR) (CD antigen CD91) [Cleaved into: Low-density lipoprotein receptor-related protein 1 85 kDa subunit (LRP-85); Low-density lipoprotein receptor-related protein 1 515 kDa subunit (LRP-515); Low-density lipoprotein receptor-related protein 1 intracellular domain (LRPICD)]	1.30197	0.000626244	Up	1.25526	0.000626244	Up
Q920A5	Scpep1 Risc	Retinoid-inducible serine carboxypeptidase (EC 3.4.16.-) (Serine carboxypeptidase 1)	1.27549	0.00435874	Up	1.22448	0.00435874	Up
Q920B9	Supt16h Fact140 Factp140 Supt16	FACT complex subunit SPT16 (Chromatin-specific transcription elongation factor 140 kDa subunit) (FACT 140 kDa subunit) (FACTp140) (Facilitates chromatin transcription complex subunit SPT16)				1.25202	0.00239129	Up
Q920E5	Fdps	Farnesyl pyrophosphate synthase (FPP synthase) (FPS) (EC 2.5.1.10) ((2E,6E)-farnesyl diphosphate synthase) (Cholesterol-regulated 39 kDa protein) (CR 39) (Dimethylallyltranstransferase) (EC 2.5.1.1) (Farnesyl diphosphate synthase) (Geranyltranstransferase)	1.11148	0.00346932	Up	1.14041	0.00346932	Up
Q920Q4	Vps16	Vacuolar protein sorting-associated protein 16 homolog (mVPS16)	1.13069	0.00719643	Up	1.223	0.00719643	Up
Q921E2	Rab31	Ras-related protein Rab-31				0.867456	0.00194413	Down
Q921E6	Eed	Polycomb protein EED				1.29961	0.0352686	Up
Q921F2	Tardbp Tdp43	TAR DNA-binding protein 43 (TDP-43)				1.12893	0.0027714	Up
Q921H8	Acaa1a Acaa1	3-ketoacyl-CoA thiolase A, peroxisomal (EC 2.3.1.16) (Acetyl-CoA C-myristoyltransferase) (EC 2.3.1.155) (Acetyl-CoA acyltransferase A) (EC 2.3.1.9) (Beta-ketothiolase A) (Peroxisomal 3-oxoacyl-CoA thiolase A)	1.18644	1.67729e-05	Up	1.28984	1.67729e-05	Up
Q921J4	Ube2s E2epf	Ubiquitin-conjugating enzyme E2 S (EC 2.3.2.23) (E2 ubiquitin-conjugating enzyme S) (Ubiquitin carrier protein S) (Ubiquitin-conjugating enzyme E2-24 kDa) (Ubiquitin-conjugating enzyme E2-EPF5) (Ubiquitin-protein ligase S)				1.42908	0.00784592	Up
Q921L5	Cog2 Ldlc	Conserved oligomeric Golgi complex subunit 2 (COG complex subunit 2) (Component of oligomeric Golgi complex 2) (Low density lipoprotein receptor defect C-complementing protein)	1.13798	0.000192746	Up	1.21091	0.000192746	Up
Q921M7	Cyrib Cyri Fam49b	CYFIP-related Rac1 interactor B (Protein FAM49B)				0.874604	0.00439486	Down
Q921N6	Ddx27	Probable ATP-dependent RNA helicase DDX27 (EC 3.6.4.13) (DEAD box protein 27)	1.08887	0.000970854	Up	1.03758	0.000970854	Up
Q921Y2	Imp3	U3 small nucleolar ribonucleoprotein protein IMP3 (U3 snoRNP protein IMP3)				1.36306	0.00113756	Up
Q922D4	Ppp6r3 D19Ertd703e Kiaa1558 Pp6r3 Saps3	Serine/threonine-protein phosphatase 6 regulatory subunit 3 (SAPS domain family member 3)				1.14892	0.0140271	Up
Q922D8	Mthfd1	C-1-tetrahydrofolate synthase, cytoplasmic (C1-THF synthase) [Cleaved into: C-1-tetrahydrofolate synthase, cytoplasmic, N-terminally processed] [Includes: Methylenetetrahydrofolate dehydrogenase (EC 1.5.1.5); Methenyltetrahydrofolate cyclohydrolase (EC 3.5.4.9); Formyltetrahydrofolate synthetase (EC 6.3.4.3)]	1.11507	8.09013e-05	Up	1.29661	8.09013e-05	Up
Q922E6	Fastkd2	FAST kinase domain-containing protein 2, mitochondrial	0.682414	0.00431769	Down
Q922H1	Prmt3 Hrmt1l3	Protein arginine N-methyltransferase 3 (EC 2.1.1.-) (Heterogeneous nuclear ribonucleoprotein methyltransferase-like protein 3)				1.18345	0.00523519	Up
Q922J3	Clip1 Kiaa4046 Rsn	CAP-Gly domain-containing linker protein 1 (Cytoplasmic linker protein 170) (CLIP-170) (Restin)				0.890399	0.0124705	Down
Q922L6	Nelfcd Nelfd Th1 Th1l	Negative elongation factor D (NELF-D) (TH1-like protein)	1.27401	0.00143603	Up	1.51365	0.00143603	Up
Q922Q4	Pycr2	Pyrroline-5-carboxylate reductase 2 (P5C reductase 2) (P5CR 2) (EC 1.5.1.2)	0.926465	0.00227238	Down	0.814157	0.00227238	Down
Q922Q8	Lrrc59	Leucine-rich repeat-containing protein 59 [Cleaved into: Leucine-rich repeat-containing protein 59, N-terminally processed]	1.14837	0.00392916	Up
Q922R5	Ppp4r3b Kiaa1387 Pp4r3b Smek2	Serine/threonine-protein phosphatase 4 regulatory subunit 3B (SMEK homolog 2)				1.19649	0.000214098	Up
Q922R8	Pdia6 Txndc7	Protein disulfide-isomerase A6 (EC 5.3.4.1) (Thioredoxin domain-containing protein 7)				0.852044	0.000421639	Down
Q922S8	Kif2c	Kinesin-like protein KIF2C (Mitotic centromere-associated kinesin) (MCAK)	1.24582	0.000293872	Up	1.45801	0.000293872	Up
Q922U1	Prpf3	U4/U6 small nuclear ribonucleoprotein Prp3 (Pre-mRNA-splicing factor 3)				1.1328	0.00204587	Up
Q922V4	Plrg1	Pleiotropic regulator 1				1.14558	0.0174134	Up
Q923D2	Blvrb	Flavin reductase (NADPH) (FR) (EC 1.5.1.30) (Biliverdin reductase B) (BVR-B) (EC 1.3.1.24) (Biliverdin-IX beta-reductase) (NADPH-dependent diaphorase) (NADPH-flavin reductase) (FLR)				0.840929	0.0164778	Down
Q923E4	Sirt1 Sir2l1	NAD-dependent protein deacetylase sirtuin-1 (EC 2.3.1.286) (NAD-dependent protein deacylase sirtuin-1) (EC 2.3.1.-) (Regulatory protein SIR2 homolog 1) (SIR2-like protein 1) (SIR2alpha) (Sir2) (mSIR2a) [Cleaved into: SirtT1 75 kDa fragment (75SirT1)]				1.15455	0.0188133	Up
Q923G2	Polr2h	DNA-directed RNA polymerases I, II, and III subunit RPABC3 (RNA polymerases I, II, and III subunit ABC3) (DNA-directed RNA polymerase II subunit H) (RPB17) (RPB8 homolog)				1.08794	0.0153639	Up
Q923T9	Camk2g	Calcium/calmodulin-dependent protein kinase type II subunit gamma (CaM kinase II subunit gamma) (CaMK-II subunit gamma) (EC 2.7.11.17)	1.3011	0.000907673	Up	1.50345	0.000907673	Up
Q923Z3	Mto1	Protein MTO1 homolog, mitochondrial				1.20798	0.0472651	Up
Q924C1	Xpo5 Kiaa1291 Ranbp21	Exportin-5 (Exp5) (Ran-binding protein 21)	1.08665	0.000257321	Up	1.30766	0.000257321	Up
Q924M7	Mpi Mpi1 Pmi	Mannose-6-phosphate isomerase (EC 5.3.1.8) (Phosphohexomutase) (Phosphomannose isomerase) (PMI)	1.13865	0.0351427	Up
Q924W5	Smc6 Kiaa4103 Smc6l1	Structural maintenance of chromosomes protein 6 (SMC protein 6) (SMC-6) (mSMC6)				1.23764	0.00876524	Up
Q99104	Myo5a Dilute	Unconventional myosin-Va (Dilute myosin heavy chain, non-muscle)				1.08774	0.00193859	Up
Q99J45	Nrbp1 Madm Nrbp	Nuclear receptor-binding protein (HLS7-interacting protein kinase) (MLF1 adapter molecule)				1.10679	0.0304588	Up
Q99J62	Rfc4	Replication factor C subunit 4 (Activator 1 subunit 4)	1.08366	0.000168681	Up	1.28773	0.000168681	Up
Q99J77	Nans Sas	Sialic acid synthase (N-acetylneuraminate-9-phosphate synthase) (EC 2.5.1.57) (N-acetylneuraminic acid phosphate synthase)	1.0804	0.00524283	Up	1.1301	0.00524283	Up
Q99J87	Dhx58 D11lgp2e Lgp2	Probable ATP-dependent RNA helicase DHX58 (EC 3.6.4.13) (Probable ATP-dependent helicase LGP2) (Protein D11Lgp2) (RIG-I-like receptor 3) (RLR-3) (RIG-I-like receptor Lgp2) (RLR)	0.719835	0.000336393	Down	0.72687	0.000336393	Down
Q99J95	Cdk9	Cyclin-dependent kinase 9 (EC 2.7.11.22) (EC 2.7.11.23) (Cell division protein kinase 9)				1.10798	0.0163615	Up
Q99J99	Mpst	3-mercaptopyruvate sulfurtransferase (MST) (EC 2.8.1.2)				0.820218	0.0316842	Down
Q99JF5	Mvd	Diphosphomevalonate decarboxylase (EC 4.1.1.33) (Mevalonate (diphospho)decarboxylase) (MDDase) (Mevalonate pyrophosphate decarboxylase)	1.08218	0.00429022	Up	1.15332	0.00429022	Up
Q99JN2	Klhl22	Kelch-like protein 22	1.31231	0.00102934	Up	1.55584	0.00102934	Up
Q99JP4	Cdc26	Anaphase-promoting complex subunit CDC26 (Cell division cycle protein 26 homolog)	1.1132	0.0124869	Up	1.1622	0.0124869	Up
Q99JT9	Adi1 Mtcbp1	1,2-dihydroxy-3-keto-5-methylthiopentene dioxygenase (EC 1.13.11.54) (Acireductone dioxygenase (Fe(2+)-requiring)) (ARD) (Fe-ARD) (Membrane-type 1 matrix metalloproteinase cytoplasmic tail-binding protein 1) (MTCBP-1)	1.18828	0.000184372	Up	1.30569	0.000184372	Up
Q99JX7	Nxf1 Tap	Nuclear RNA export factor 1 (Tip-associated protein) (Tip-associating protein) (mRNA export factor TAP)				1.26319	0.00336933	Up
Q99JY0	Hadhb	Trifunctional enzyme subunit beta, mitochondrial (TP-beta) [Includes: 3-ketoacyl-CoA thiolase (EC 2.3.1.155) (EC 2.3.1.16) (Acetyl-CoA acyltransferase) (Beta-ketothiolase)]	1.10463	0.00938526	Up	1.16829	0.00938526	Up
Q99JY9	Actr3 Arp3	Actin-related protein 3 (Actin-like protein 3)	0.929829	0.000299557	Down	0.761768	0.000299557	Down
Q99K01	Pdxdc1	Pyridoxal-dependent decarboxylase domain-containing protein 1 (EC 4.1.1.-)				1.16189	0.0113868	Up
Q99K23	Ufsp2	Ufm1-specific protease 2 (UfSP2) (EC 3.4.22.-)	1.31773	0.0119684	Up	1.3792	0.0119684	Up
Q99K28	Arfgap2 Zfp289 Znf289	ADP-ribosylation factor GTPase-activating protein 2 (ARF GAP 2) (GTPase-activating protein ZNF289) (Zinc finger protein 289)				1.17744	0.000526989	Up
Q99K51	Pls3	Plastin-3 (T-plastin)	0.920648	8.9483e-05	Down	0.758026	8.9483e-05	Down
Q99K85	Psat1 Psa Psat	Phosphoserine aminotransferase (PSAT) (EC 2.6.1.52) (Endometrial progesterone-induced protein) (EPIP) (Phosphohydroxythreonine aminotransferase)	1.09877	0.0132264	Up	1.12723	0.0132264	Up
Q99KC8	Vwa5a Loh11cr2a	von Willebrand factor A domain-containing protein 5A (Loss of heterozygosity 11 chromosomal region 2 gene A protein homolog)	1.1002	0.0122031	Up
Q99KD5	Unc45a Smap1	Protein unc-45 homolog A (Unc-45A) (Stromal membrane-associated protein 1) (SMAP-1)	0.926727	0.00906678	Down
Q99KE1	Me2	NAD-dependent malic enzyme, mitochondrial (NAD-ME) (EC 1.1.1.38) (Malic enzyme 2)				0.776562	0.000401703	Down
Q99KG3	Rbm10 Kiaa0122	RNA-binding protein 10 (RNA-binding motif protein 10)				1.26436	0.000421639	Up
Q99KI0	Aco2	Aconitate hydratase, mitochondrial (Aconitase) (EC 4.2.1.3) (Citrate hydro-lyase)				0.878618	0.00472127	Down
Q99KQ4	Nampt Pbef1	Nicotinamide phosphoribosyltransferase (NAmPRTase) (Nampt) (EC 2.4.2.12) (Pre-B-cell colony-enhancing factor 1 homolog) (PBEF) (Visfatin)	0.880463	6.47171e-05	Down	0.765586	6.47171e-05	Down
Q99KR7	Ppif	Peptidyl-prolyl cis-trans isomerase F, mitochondrial (PPIase F) (EC 5.2.1.8) (Cyclophilin D) (CyP-D) (CypD) (Cyclophilin F) (Rotamase F)	0.849123	0.00211077	Down	0.698934	0.00211077	Down
Q99L13	Hibadh	3-hydroxyisobutyrate dehydrogenase, mitochondrial (HIBADH) (EC 1.1.1.31)				0.70191	0.000501606	Down
Q99L27	Gmpr2	GMP reductase 2 (GMPR 2) (EC 1.7.1.7) (Guanosine 5'-monophosphate oxidoreductase 2) (Guanosine monophosphate reductase 2)	1.34142	0.0442344	Up
Q99L48	Nmd3	60S ribosomal export protein NMD3				1.37694	0.0381993	Up
Q99LB6	Mat2b	Methionine adenosyltransferase 2 subunit beta (Methionine adenosyltransferase II beta) (MAT II beta)	1.06497	0.0274365	Up	1.05137	0.0274365	Up
Q99LC3	Ndufa10	NADH dehydrogenase [ubiquinone] 1 alpha subcomplex subunit 10, mitochondrial (Complex I-42kD) (CI-42kD) (NADH-ubiquinone oxidoreductase 42 kDa subunit)				1.1821	0.0273552	Up
Q99LC5	Etfa	Electron transfer flavoprotein subunit alpha, mitochondrial (Alpha-ETF)	0.947507	0.00494805	Down	0.914083	0.00494805	Down
Q99LF4	Rtcb D10Wsu52e	RNA-splicing ligase RtcB homolog (EC 6.5.1.8) (3'-phosphate/5'-hydroxy nucleic acid ligase) (Focal adhesion-associated protein) (FAAP)	1.06513	0.000311723	Up	1.17506	0.000311723	Up
Q99LG2	Tnpo2	Transportin-2 (Karyopherin beta-2b)				1.05732	0.0199483	Up
Q99LH1	Gnl2	Nucleolar GTP-binding protein 2				1.27308	4.96903e-05	Up
Q99LI7	Cstf3	Cleavage stimulation factor subunit 3 (CF-1 77 kDa subunit) (Cleavage stimulation factor 77 kDa subunit) (CSTF 77 kDa subunit) (CstF-77)				0.8933	0.0254641	Down
Q99LI8	Hgs Hrs	Hepatocyte growth factor-regulated tyrosine kinase substrate				1.10541	0.0190904	Up
Q99LJ0	Cttnbp2nl Kiaa1433	CTTNBP2 N-terminal-like protein	0.850141	0.0159965	Down	0.870181	0.0159965	Down
Q99LJ1	Fuca1 Fuca	Tissue alpha-L-fucosidase (EC 3.2.1.51) (Alpha-L-fucosidase I) (Alpha-L-fucoside fucohydrolase 1) (Alpha-L-fucosidase 1)	1.3766	0.00237927	Up	1.43872	0.00237927	Up
Q99LL5	Pwp1	Periodic tryptophan protein 1 homolog				1.16083	0.0102003	Up
Q99LN9	Dohh	Deoxyhypusine hydroxylase (DOHH) (EC 1.14.99.29) (Deoxyhypusine dioxygenase) (Deoxyhypusine monooxygenase)	0.882778	0.04975	Down
Q99LP6	Grpel1	GrpE protein homolog 1, mitochondrial (Mt-GrpE#1)	0.91234	8.71868e-06	Down	0.667093	8.71868e-06	Down
Q99LT0	Dpy30	Protein dpy-30 homolog (Dpy-30-like protein) (Dpy-30L)				1.11431	0.029709	Up
Q99LX0	Park7	Parkinson disease protein 7 homolog (Maillard deglycase) (Parkinsonism-associated deglycase) (Protein DJ-1) (DJ-1) (Protein/nucleic acid deglycase DJ-1) (EC 3.1.2.-) (EC 3.5.1.-) (EC 3.5.1.124)	1.11894	0.00472974	Up	1.16301	0.00472974	Up
Q99LZ3	Gins4 Sld5	DNA replication complex GINS protein SLD5 (GINS complex subunit 4) [Cleaved into: DNA replication complex GINS protein SLD5, N-terminally processed]	1.22975	0.00169764	Up	1.25344	0.00169764	Up
Q99M04	Lias Lip1	Lipoyl synthase, mitochondrial (EC 2.8.1.8) (Lipoate synthase) (LS) (Lip-syn) (mLIP1) (Lipoic acid synthase)	1.3241	0.0036334	Up	1.61488	0.0036334	Up
Q99M31	Hspa14 Hsp70-4	Heat shock 70 kDa protein 14 (NST-1) (hsr.1)				1.29459	0.0381853	Up
Q99MD9	Nasp	Nuclear autoantigenic sperm protein (NASP)				1.06429	0.00452697	Up
Q99ME9	Gtpbp4 Crfg Nog1	GTP-binding protein 4 (Chronic renal failure gene protein) (GTP-binding protein NGB) (Nucleolar GTP-binding protein 1)	0.915475	0.00128379	Down	1.09239	0.00128379	Up
Q99MI1	Erc1 Cast2 Kiaa1081 Rab6ip2	ELKS/Rab6-interacting/CAST family member 1 (ERC-1) (CAZ-associated structural protein 2) (CAST2) (Rab6-interacting protein 2)	1.06479	0.000203816	Up	1.2495	0.000203816	Up
Q99MN1	Kars1 Kars	Lysine--tRNA ligase (EC 2.7.7.-) (EC 6.1.1.6) (Lysyl-tRNA synthetase) (LysRS)				0.932225	0.0304311	Down
Q99MN9	Pccb	Propionyl-CoA carboxylase beta chain, mitochondrial (PCCase subunit beta) (EC 6.4.1.3) (Propanoyl-CoA:carbon dioxide ligase subunit beta)				0.743578	0.00376222	Down
Q99MR6	Srrt Ars2 Asr2	Serrate RNA effector molecule homolog (Arsenite-resistance protein 2)				0.945944	0.000457433	Down
Q99MU3	Adar	Double-stranded RNA-specific adenosine deaminase (DRADA) (EC 3.5.4.37) (RNA adenosine deaminase 1)	0.751023	0.00218536	Down	0.899474	0.00218536	Down
Q99N20	Brms1	Breast cancer metastasis-suppressor 1 homolog	1.30309	0.00151449	Up	1.39966	0.00151449	Up
Q99N92	Mrpl27	39S ribosomal protein L27, mitochondrial (L27mt) (MRP-L27)				0.652727	0.000523768	Down
Q99N94	Mrpl9	39S ribosomal protein L9, mitochondrial (L9mt) (MRP-L9)	0.86062	0.00468448	Down	0.713526	0.00468448	Down
Q99NB8	Ubqln4 Cip75 Ubin	Ubiquilin-4 (Ataxin-1 interacting ubiquitin-like protein) (A1Up) (Ataxin-1 ubiquitin-like-interacting protein A1U) (Connexin43-interacting protein of 75 kDa) (CIP75)	1.13581	0.00336902	Up	1.21931	0.00336902	Up
Q99NB9	Sf3b1 Sap155	Splicing factor 3B subunit 1 (Pre-mRNA-splicing factor SF3b 155 kDa subunit) (SF3b155) (Spliceosome-associated protein 155) (SAP 155)	0.917494	0.0012486	Down	0.875228	0.0012486	Down
Q99NH0	Ankrd17 Foe Gtar Kiaa0697	Ankyrin repeat domain-containing protein 17 (Ankyrin repeat domain-containing protein FOE) (Gene trap ankyrin repeat protein)	0.920544	0.0226751	Down
Q99P31	Hspbp1 Hspbp	Hsp70-binding protein 1 (HspBP1) (Heat shock protein-binding protein 1) (Hsp70-interacting protein 1)	0.91333	0.0177276	Down
Q99P69	Nuf2 Cdca1 Nuf2r	Kinetochore protein Nuf2 (Cell division cycle-associated protein 1)	1.40507	0.0109124	Up	1.48986	0.0109124	Up
Q99P91	Gpnmb Dchil Hgfin Nmb	Transmembrane glycoprotein NMB (DC-HIL) (Dendritic cell-associated transmembrane protein) (Osteoactivin)	1.12473	0.0317564	Up
Q99PL5	Rrbp1	Ribosome-binding protein 1 (Ribosome receptor protein) (RRp) (mRRp)	1.27536	7.09198e-05	Up	1.23955	7.09198e-05	Up
Q99PM9	Uck2 Umpk	Uridine-cytidine kinase 2 (UCK 2) (EC 2.7.1.48) (Cytidine monophosphokinase 2) (Uridine monophosphokinase 2)	0.92933	0.00201906	Down	1.11864	0.00201906	Up
Q99PP7	Trim33 Kiaa1113	E3 ubiquitin-protein ligase TRIM33 (EC 2.3.2.27) (Ectodermin homolog) (RING-type E3 ubiquitin transferase TRIM33) (Transcription intermediary factor 1-gamma) (TIF1-gamma) (Tripartite motif-containing protein 33)				1.11634	0.0194714	Up
Q99PU7	Bap1 Kiaa0272	Ubiquitin carboxyl-terminal hydrolase BAP1 (EC 3.4.19.12) (BRCA1-associated protein 1) (Ubiquitin C-terminal hydrolase X4) (UCH-X4)				1.06516	0.0228687	Up
Q99PU8	Dhx30 Helg	ATP-dependent RNA helicase DHX30 (EC 3.6.4.13) (DEAH box protein 30)				1.15351	0.0378926	Up
Q99PV0	Prpf8 Prp8	Pre-mRNA-processing-splicing factor 8 (Splicing factor Prp8)				1.05212	0.0405875	Up
Q9BDB7	Ifi44l H28	Interferon-induced protein 44-like [Cleaved into: Minor histocompatibility antigen HA-28 (HLA-HA28) (IFL8)]	0.809141	2.19787e-06	Down	0.617536	2.19787e-06	Down
Q9CPN8	Igf2bp3 Vickz3	Insulin-like growth factor 2 mRNA-binding protein 3 (IGF2 mRNA-binding protein 3) (IMP-3) (mIMP-3) (IGF-II mRNA-binding protein 3) (VICKZ family member 3)				1.15059	0.00424099	Up
Q9CPP0	Npm3	Nucleoplasmin-3				0.684392	0.0292192	Down
Q9CPR5	Mrpl15	39S ribosomal protein L15, mitochondrial (L15mt) (MRP-L15)				0.633009	0.00194413	Down
Q9CPS7	Pno1	RNA-binding protein PNO1	1.30306	0.00347862	Up	1.18787	0.00347862	Up
Q9CPT4	Mydgf D17Wsu104e	Myeloid-derived growth factor (MYDGF)				0.832779	0.00198178	Down
Q9CPU0	Glo1	Lactoylglutathione lyase (EC 4.4.1.5) (Aldoketomutase) (Glyoxalase I) (Glx I) (Ketone-aldehyde mutase) (Methylglyoxalase) (S-D-lactoylglutathione methylglyoxal lyase)	1.20015	0.0335638	Up
Q9CPV1	Ska1	Spindle and kinetochore-associated protein 1	1.54624	0.00155988	Up	1.74687	0.00155988	Up
Q9CPV4	Glod4	Glyoxalase domain-containing protein 4	1.23175	0.00328197	Up	1.26069	0.00328197	Up
Q9CPW4	Arpc5	Actin-related protein 2/3 complex subunit 5 (Arp2/3 complex 16 kDa subunit) (p16-ARC)	0.915938	9.06324e-05	Down	0.76138	9.06324e-05	Down
Q9CPX7	Mrps16 Rpms16	28S ribosomal protein S16, mitochondrial (MRP-S16) (S16mt)				0.759437	0.00380142	Down
Q9CPY7	Lap3 Lapep	Cytosol aminopeptidase (EC 3.4.11.1) (Cysteinylglycine-S-conjugate dipeptidase) (EC 3.4.13.23) (Leucine aminopeptidase 3) (LAP-3) (Leucyl aminopeptidase) (Peptidase S) (Proline aminopeptidase) (EC 3.4.11.5) (Prolyl aminopeptidase)	0.903746	0.000476511	Down	0.822208	0.000476511	Down
Q9CQ02	Commd4	COMM domain-containing protein 4	1.22355	0.0128952	Up	1.21921	0.0128952	Up
Q9CQ22	Lamtor1	Ragulator complex protein LAMTOR1 (Late endosomal/lysosomal adaptor and MAPK and MTOR activator 1) (Lipid raft adaptor protein p18)	1.16096	0.0380446	Up
Q9CQ28	Dph6 Atpbd4	Diphthine--ammonia ligase (EC 6.3.1.14) (ATP-binding domain-containing protein 4) (Diphthamide synthase) (Diphthamide synthetase) (Protein DPH6 homolog)				1.17125	0.0264355	Up
Q9CQ36	Pole4	DNA polymerase epsilon subunit 4 (DNA polymerase II subunit 4) (DNA polymerase epsilon subunit p12)	1.10205	2.36094e-05	Up	1.33798	2.36094e-05	Up
Q9CQ40	Mrpl49	39S ribosomal protein L49, mitochondrial (L49mt) (MRP-L49)				0.744916	0.00154178	Down
Q9CQ48	Nudcd2 D11Ertd603e	NudC domain-containing protein 2				1.11821	0.0163615	Up
Q9CQ60	Pgls	6-phosphogluconolactonase (6PGL) (EC 3.1.1.31)				1.23111	0.0303339	Up
Q9CQ71	Rpa3	Replication protein A 14 kDa subunit (RP-A p14) (Replication factor A protein 3) (RF-A protein 3)	1.15141	0.00040447	Up	1.34608	0.00040447	Up
Q9CQ79	Txndc9 Apacd	Thioredoxin domain-containing protein 9 (ATP-binding protein associated with cell differentiation)	0.860092	0.000126849	Down	0.884487	0.000126849	Down
Q9CQ80	Vps25 D11Wsu68e	Vacuolar protein-sorting-associated protein 25 (ESCRT-II complex subunit VPS25)				1.36551	0.00255855	Up
Q9CQA1	Trappc5	Trafficking protein particle complex subunit 5				1.47709	0.0149699	Up
Q9CQA3	Sdhb	Succinate dehydrogenase [ubiquinone] iron-sulfur subunit, mitochondrial (EC 1.3.5.1) (Iron-sulfur subunit of complex II) (Ip)	0.963042	0.000126849	Down	0.872718	0.000126849	Down
Q9CQA9	Ntpcr	Cancer-related nucleoside-triphosphatase homolog (NTPase) (EC 3.6.1.15) (Nucleoside triphosphate phosphohydrolase)	1.08594	0.000380544	Up	1.2609	0.000380544	Up
Q9CQC6	Bzw1	Basic leucine zipper and W2 domain-containing protein 1				1.11537	0.000323626	Up
Q9CQE1	Nipsnap3b Nipsnap3a	Protein NipSnap homolog 3B (NipSnap3B) (NipSnap-related protein) (Protein NipSnap homolog 3A) (NipSnap3A)				0.654048	0.0377854	Down
Q9CQE3	Mrps17 Rpms17	28S ribosomal protein S17, mitochondrial (MRP-S17) (S17mt)				0.799403	0.0310236	Down
Q9CQE8	RTRAF	RNA transcription, translation and transport factor protein				1.11326	0.0122603	Up
Q9CQF0	Mrpl11	39S ribosomal protein L11, mitochondrial (L11mt) (MRP-L11)	0.903003	0.000638955	Down	0.749217	0.000638955	Down
Q9CQG1	Chac2	Putative glutathione-specific gamma-glutamylcyclotransferase 2 (Gamma-GCG 2) (EC 4.3.2.7) (Cation transport regulator-like protein 2)	0.885787	0.000464658	Down	0.687403	0.000464658	Down
Q9CQH7	Btf3l4	Transcription factor BTF3 homolog 4 (Basic transcription factor 3-like 4)				0.828805	0.0128258	Down
Q9CQI3	Gmfb	Glia maturation factor beta (GMF-beta)				0.734792	0.00340397	Down
Q9CQJ6	Denr	Density-regulated protein (DRP)	0.761995	0.00570117	Down	0.783416	0.00570117	Down
Q9CQM9	Glrx3 Picot Txnl2	Glutaredoxin-3 (PKC-interacting cousin of thioredoxin) (PICOT) (PKC-theta-interacting protein) (PKCq-interacting protein) (Thioredoxin-like protein 2)				1.20126	0.000775591	Up
Q9CQN1	Trap1 Hsp75	Heat shock protein 75 kDa, mitochondrial (HSP 75) (TNFR-associated protein 1) (Tumor necrosis factor type 1 receptor-associated protein) (TRAP-1)	0.918671	0.000296288	Down	0.850378	0.000296288	Down
Q9CQN7	Mrpl41	39S ribosomal protein L41, mitochondrial (L41mt) (MRP-L41)				0.746753	0.0154044	Down
Q9CQR4	Acot13 Them2	Acyl-coenzyme A thioesterase 13 (Acyl-CoA thioesterase 13) (EC 3.1.2.-) (Hotdog-fold thioesterase superfamily member 2) (Palmitoyl-CoA hydrolase) (EC 3.1.2.2) (Thioesterase superfamily member 2) (THEM2)	1.19129	0.0420615	Up
Q9CQS5	Riok2	Serine/threonine-protein kinase RIO2 (EC 2.7.11.1) (RIO kinase 2)				1.23396	0.00851035	Up
Q9CQT1	Mri1	Methylthioribose-1-phosphate isomerase (M1Pi) (MTR-1-P isomerase) (EC 5.3.1.23) (S-methyl-5-thioribose-1-phosphate isomerase) (Translation initiation factor eIF-2B subunit alpha/beta/delta-like protein)	1.10439	0.000184372	Up	1.24541	0.000184372	Up
Q9CQU5	Zwint D10Ertd749e	ZW10 interactor (ZW10-interacting protein 1) (Zwint-1)	0.965569	3.14287e-05	Down	1.13713	3.14287e-05	Up
Q9CQW9	Ifitm3	Interferon-induced transmembrane protein 3 (Dispanin subfamily A member 2b) (DSPA2b) (Fragilis protein) (Interferon-inducible protein 15) (Mouse ifitm-like protein 1) (Mil-1)	0.828521	9.89579e-06	Down	0.603441	9.89579e-06	Down
Q9CQX8	Mrps36 Kgd4	28S ribosomal protein S36, mitochondrial (MRP-S36) (S36mt) (Alpha-ketoglutarate dehydrogenase component 4)	0.923626	8.59452e-05	Down	0.709593	8.59452e-05	Down
Q9CQY2	Ramac Fam103a1 Rammet	RNA guanine-N7 methyltransferase activating subunit (Protein FAM103A1) (RNA guanine-7 methyltransferase activating subunit) (RNMT-activating mRNA cap methylating subunit) (RNMT-activating mRNA cap methyltransferase subunit) (RNMT-activating mini protein) (RAM)	1.46311	0.00718032	Up	1.36733	0.00718032	Up
Q9CQY6	Uqcc2 Mnf1	Ubiquinol-cytochrome-c reductase complex assembly factor 2 (Mitochondrial nucleoid factor 1) (Mitochondrial protein M19)				0.705511	0.0089561	Down
Q9CR10	Oxld1	Oxidoreductase-like domain-containing protein 1	1.42262	0.0169935	Up	1.28991	0.0169935	Up
Q9CR16	Ppid	Peptidyl-prolyl cis-trans isomerase D (PPIase D) (EC 5.2.1.8) (40 kDa peptidyl-prolyl cis-trans isomerase) (Cyclophilin-40) (CYP-40) (Rotamase D)	0.926651	0.00893601	Down
Q9CR21	Ndufab1	Acyl carrier protein, mitochondrial (ACP) (CI-SDAP) (NADH-ubiquinone oxidoreductase 9.6 kDa subunit)	0.951234	1.97781e-07	Down	0.780543	1.97781e-07	Down
Q9CR50	Rchy1 Arnip Chimp Zfp363 Znf363	RING finger and CHY zinc finger domain-containing protein 1 (EC 2.3.2.27) (Androgen receptor N-terminal-interacting protein) (CH-rich-interacting match with PLAG1) (E3 ubiquitin-protein ligase Pirh2) (RING-type E3 ubiquitin transferase RCHY1) (Zinc finger protein 363)	1.37857	1.73568e-05	Up	1.48166	1.73568e-05	Up
Q9CR51	Atp6v1g1 Atp6g1	V-type proton ATPase subunit G 1 (V-ATPase subunit G 1) (V-ATPase 13 kDa subunit 1) (Vacuolar proton pump subunit G 1)	0.891095	0.00344454	Down	0.810678	0.00344454	Down
Q9CR56	Nkiras2	NF-kappa-B inhibitor-interacting Ras-like protein 2 (I-kappa-B-interacting Ras-like protein 2) (Kappa B-Ras protein 2) (KappaB-Ras2)				1.18149	0.00352059	Up
Q9CR86	Carhsp1	Calcium-regulated heat stable protein 1 (Calcium-regulated heat-stable protein of 24 kDa) (CRHSP-24)				0.830295	0.00395767	Down
Q9CR88	Mrps14	28S ribosomal protein S14, mitochondrial (MRP-S14) (S14mt)	0.841189	0.0325312	Down	0.808601	0.0325312	Down
Q9CR98	Fam136a	Protein FAM136A				0.836898	0.0435596	Down
Q9CRA5	Golph3 Gpp34	Golgi phosphoprotein 3 (Coat protein GPP34)	0.887165	0.00844581	Down	0.825246	0.00844581	Down
Q9CRA8	Exosc5 D7Wsu180e Rrp46	Exosome complex component RRP46 (Exosome component 5) (Ribosomal RNA-processing protein 46)				1.15208	0.0175529	Up
Q9CRC8	Lrrc40	Leucine-rich repeat-containing protein 40				1.18611	0.00151609	Up
Q9CS42	Prps2	Ribose-phosphate pyrophosphokinase 2 (EC 2.7.6.1) (Phosphoribosyl pyrophosphate synthase II) (PRS-II)	1.18394	0.016558	Up	1.1653	0.016558	Up
Q9CSH3	Dis3 Kiaa1008 Rrp44	Exosome complex exonuclease RRP44 (EC 3.1.13.-) (EC 3.1.26.-) (Protein DIS3 homolog) (Ribosomal RNA-processing protein 44)				1.22639	0.000463436	Up
Q9CU62	Smc1a Sb1.8 Smc1 Smc1l1 Smcb	Structural maintenance of chromosomes protein 1A (SMC protein 1A) (SMC-1-alpha) (SMC-1A) (Chromosome segregation protein SmcB) (Sb1.8)	0.939088	0.00332168	Down	1.0734	0.00332168	Up
Q9CVB6	Arpc2	Actin-related protein 2/3 complex subunit 2 (Arp2/3 complex 34 kDa subunit) (p34-ARC)				0.781698	0.00027724	Down
Q9CVD2	Atxn3 Mjd	Ataxin-3 (EC 3.4.19.12) (Machado-Joseph disease protein 1 homolog)				1.17881	0.00450172	Up
Q9CW03	Smc3 Bam Bmh Cspg6 Mmip1 Smc3l1 Smcd	Structural maintenance of chromosomes protein 3 (SMC protein 3) (SMC-3) (Basement membrane-associated chondroitin proteoglycan) (Bamacan) (Chondroitin sulfate proteoglycan 6) (Chromosome segregation protein SmcD) (Mad member-interacting protein 1)				1.11107	0.00352059	Up
Q9CW46	Raver1 Kiaa1978	Ribonucleoprotein PTB-binding 1 (Protein raver-1)	1.12619	0.000490587	Up	1.28838	0.000490587	Up
Q9CWB7		Glutaredoxin-like protein C5orf63 homolog	1.27158	0.0149863	Up	1.2095	0.0149863	Up
Q9CWI3	Bccip	BRCA2 and CDKN1A-interacting protein				1.16521	0.00108699	Up
Q9CWJ9	Atic Purh	Bifunctional purine biosynthesis protein ATIC (AICAR transformylase/inosine monophosphate cyclohydrolase) (ATIC) [Includes: Phosphoribosylaminoimidazolecarboxamide formyltransferase (EC 2.1.2.3) (5-aminoimidazole-4-carboxamide ribonucleotide formyltransferase) (AICAR formyltransferase) (AICAR transformylase); IMP cyclohydrolase (EC 3.5.4.10) (IMP synthase) (Inosinicase)]				1.12856	0.0079914	Up
Q9CWL8	Ctnnbl1	Beta-catenin-like protein 1 (Nuclear-associated protein) (NAP)				1.19112	0.0264879	Up
Q9CWS4	Ints11 Cpsf3l	Integrator complex subunit 11 (Int11) (EC 3.1.27.-) (Cleavage and polyadenylation-specific factor 3-like protein) (CPSF3-like protein)	1.17829	0.011756	Up	1.28691	0.011756	Up
Q9CWU4		UPF0690 protein C1orf52 homolog	0.735616	0.0376239	Down	0.705942	0.0376239	Down
Q9CWY8	Rnaseh2a Rnasehi	Ribonuclease H2 subunit A (RNase H2 subunit A) (EC 3.1.26.4) (Ribonuclease HI large subunit) (RNase HI large subunit) (Ribonuclease HI subunit A)	1.1874	0.00577352	Up	1.2956	0.00577352	Up
Q9CWZ7	Napg Snapg	Gamma-soluble NSF attachment protein (SNAP-gamma) (N-ethylmaleimide-sensitive factor attachment protein gamma)				0.820662	0.0121814	Down
Q9CX00	Ist1 Kiaa0174	IST1 homolog				0.908485	0.0408781	Down
Q9CX11	Utp23	rRNA-processing protein UTP23 homolog	0.927127	0.00377232	Down	0.88963	0.00377232	Down
Q9CX56	Psmd8	26S proteasome non-ATPase regulatory subunit 8 (26S proteasome regulatory subunit RPN12) (26S proteasome regulatory subunit S14)				0.853947	0.000826182	Down
Q9CX86	Hnrnpa0 Hnrpa0	Heterogeneous nuclear ribonucleoprotein A0 (hnRNP A0)	1.07385	4.30364e-05	Up	1.26434	4.30364e-05	Up
Q9CXE7	Tmed5	Transmembrane emp24 domain-containing protein 5 (p24 family protein gamma-2) (p24gamma2)	0.75243	0.00143297	Down	0.702819	0.00143297	Down
Q9CXF4	Tbc1d15	TBC1 domain family member 15 (GTPase-activating protein RAB7) (GAP for RAB7) (Rab7-GAP)	1.12817	0.000633461	Up	1.20263	0.000633461	Up
Q9CXI5	Manf Armet	Mesencephalic astrocyte-derived neurotrophic factor (Arginine-rich protein) (Protein ARMET)				0.721184	9.06324e-05	Down
Q9CXK9	Rbm33 Prr8	RNA-binding protein 33 (Proline-rich protein 8) (RNA-binding motif protein 33)	1.14144	0.000192746	Up	1.30051	0.000192746	Up
Q9CXT8	Pmpcb	Mitochondrial-processing peptidase subunit beta (EC 3.4.24.64) (Beta-MPP) (P-52)	0.900494	0.000811869	Down	0.757615	0.000811869	Down
Q9CXU0	Med10 D13Wsu50e	Mediator of RNA polymerase II transcription subunit 10 (Mediator complex subunit 10)				1.10284	0.0129452	Up
Q9CXV9	Dcun1d5	DCN1-like protein 5 (DCNL5) (DCUN1 domain-containing protein 5) (Defective in cullin neddylation protein 1-like protein 5) (Squamous cell carcinoma-related oncogene 5)				1.1857	0.00533739	Up
Q9CXW2	Mrps22 Rpms22	28S ribosomal protein S22, mitochondrial (MRP-S22) (S22mt)				0.766997	0.0168467	Down
Q9CXW4	Rpl11	60S ribosomal protein L11	0.935625	0.0026205	Down	0.956379	0.0026205	Down
Q9CXX9	Cuedc2	CUE domain-containing protein 2				1.1331	0.0122112	Up
Q9CXY6	Ilf2 Nf45	Interleukin enhancer-binding factor 2 (Nuclear factor of activated T-cells 45 kDa)				0.921225	0.0185408	Down
Q9CY16	Mrps28	28S ribosomal protein S28, mitochondrial (MRP-S28) (S28mt)	0.83742	0.000312419	Down	0.578037	0.000312419	Down
Q9CY34	Ube2f Ube2fa	NEDD8-conjugating enzyme UBE2F (EC 2.3.2.34) (NEDD8 carrier protein UBE2F) (NEDD8 protein ligase UBE2F) (NEDD8-conjugating enzyme 2) (RING-type E3 NEDD8 transferase UBE2F) (Ubiquitin-conjugating enzyme E2 F)	0.745099	0.000182549	Down	1.10172	0.000182549	Up
Q9CY50	Ssr1	Translocon-associated protein subunit alpha (TRAP-alpha) (Signal sequence receptor subunit alpha) (SSR-alpha)				0.735452	0.012125	Down
Q9CY57	Chtop Fop MNCb-1706	Chromatin target of PRMT1 protein (Friend of PRMT1 protein) (Small arginine- and glycine-rich protein) (SRAG)				0.781105	0.000163633	Down
Q9CY58	Serbp1 Pairbp1	Plasminogen activator inhibitor 1 RNA-binding protein (PAI1 RNA-binding protein 1) (PAI-RBP1) (SERPINE1 mRNA-binding protein 1)	0.942546	0.00933794	Down	0.956927	0.00933794	Down
Q9CY73	Mrpl44	39S ribosomal protein L44, mitochondrial (L44mt) (MRP-L44) (EC 3.1.26.-)				0.735256	0.00192563	Down
Q9CY97	Ssu72	RNA polymerase II subunit A C-terminal domain phosphatase SSU72 (CTD phosphatase SSU72) (EC 3.1.3.16)				1.24983	0.000803045	Up
Q9CYG7	Tomm34	Mitochondrial import receptor subunit TOM34 (Translocase of outer membrane 34 kDa subunit)				1.26131	0.00570117	Up
Q9CYI0		Protein Njmu-R1	1.05023	0.000759582	Up	1.14038	0.000759582	Up
Q9CYR0	Ssbp1	Single-stranded DNA-binding protein, mitochondrial (Mt-SSB) (MtSSB)	0.823368	0.000685136	Down	0.599123	0.000685136	Down
Q9CYW4	Hdhd3	Haloacid dehalogenase-like hydrolase domain-containing protein 3	0.953081	0.000214098	Down	0.813742	0.000214098	Down
Q9CYZ2	Tpd52l2	Tumor protein D54 (Tumor protein D52-like 2)				0.960563	0.02475	Down
Q9CYZ6	Rex1bd	Required for excision 1-B domain-containing protein				1.10097	0.0163615	Up
Q9CZ13	Uqcrc1	Cytochrome b-c1 complex subunit 1, mitochondrial (Complex III subunit 1) (Core protein I) (Ubiquinol-cytochrome-c reductase complex core protein 1)	0.837095	2.48658e-05	Down	0.661744	2.48658e-05	Down
Q9CZ15	Gins1 Psf1	DNA replication complex GINS protein PSF1 (GINS complex subunit 1)				1.18371	0.0328089	Up
Q9CZ91	Srfbp1	Serum response factor-binding protein 1 (SRF-dependent transcription regulation-associated protein) (p49/STRAP)	0.890781	0.00973256	Down	0.835286	0.00973256	Down
Q9CZH3	Psmg3 Pac3	Proteasome assembly chaperone 3 (PAC-3) (mPAC3)				1.14841	0.00900708	Up
Q9CZJ1	Utp11 Utp11l	Probable U3 small nucleolar RNA-associated protein 11 (U3 snoRNA-associated protein 11) (UTP11-like protein)				1.30466	0.00765341	Up
Q9CZL5	Pcbd2 Dcoh2 Dcohm	Pterin-4-alpha-carbinolamine dehydratase 2 (PHS 2) (EC 4.2.1.96) (4-alpha-hydroxy-tetrahydropterin dehydratase 2) (DcoH-like protein DCoHm) (Dimerization cofactor of hepatocyte nuclear factor 1 from muscle) (HNF-1-alpha dimerization cofactor)	0.94479	0.000540793	Down	0.801098	0.000540793	Down
Q9CZN7	Shmt2	Serine hydroxymethyltransferase, mitochondrial (SHMT) (EC 2.1.2.1) (Glycine hydroxymethyltransferase) (Serine methylase)				0.779176	0.000458743	Down
Q9CZS1	Aldh1b1 Aldhx	Aldehyde dehydrogenase X, mitochondrial (EC 1.2.1.3) (Aldehyde dehydrogenase family 1 member B1)	0.860215	5.80566e-05	Down	0.625881	5.80566e-05	Down
Q9CZU6	Cs	Citrate synthase, mitochondrial (EC 2.3.3.1) (Citrate (Si)-synthase)				0.798609	0.00214877	Down
Q9CZX0	Elp3	Elongator complex protein 3 (Protein lysine acetyltransferase ELP3) (EC 2.3.1.-) (tRNA uridine(34) acetyltransferase) (EC 2.3.1.-)	1.18111	0.00158373	Up	1.43662	0.00158373	Up
Q9D020	Nt5c3a Nt5c3	Cytosolic 5'-nucleotidase 3A (EC 3.1.3.5) (7-methylguanosine phosphate-specific 5'-nucleotidase) (7-methylguanosine nucleotidase) (EC 3.1.3.91) (Cytosolic 5'-nucleotidase 3) (Cytosolic 5'-nucleotidase III) (cN-III) (Lupin) (Pyrimidine 5'-nucleotidase 1) (P5'N-1) (P5N-1) (PN-I)	0.786607	0.000642283	Down	0.639864	0.000642283	Down
Q9D051	Pdhb	Pyruvate dehydrogenase E1 component subunit beta, mitochondrial (PDHE1-B) (EC 1.2.4.1)	0.959841	3.08417e-05	Down	0.764235	3.08417e-05	Down
Q9D061	Acbd6	Acyl-CoA-binding domain-containing protein 6				1.10978	0.00484831	Up
Q9D083	Spc24 Spbc24	Kinetochore protein Spc24	1.44623	1.01598e-05	Up	1.71318	1.01598e-05	Up
Q9D0B0	Srsf9 Sfrs9	Serine/arginine-rich splicing factor 9 (Splicing factor, arginine/serine-rich 9)	0.797255	0.00182445	Down
Q9D0B6	Pbdc1	Protein PBDC1 (Polysaccharide biosynthesis domain-containing protein 1)				1.1179	0.0415737	Up
Q9D0D5	Gtf2e1	General transcription factor IIE subunit 1 (General transcription factor IIE 56 kDa subunit) (Transcription initiation factor IIE subunit alpha) (TFIIE-alpha)				1.25531	0.0210104	Up
Q9D0E1	Hnrnpm Hnrpm	Heterogeneous nuclear ribonucleoprotein M (hnRNP M)	1.13056	5.62243e-05	Up	1.36098	5.62243e-05	Up
Q9D0F1	Ndc80 Hec1 Kntc2	Kinetochore protein NDC80 homolog (Kinetochore protein Hec1) (Kinetochore-associated protein 2)	1.42312	0.000248094	Up	1.66238	0.000248094	Up
Q9D0F4	Nkap	NF-kappa-B-activating protein				1.33033	0.0386704	Up
Q9D0F9	Pgm1 Pgm2	Phosphoglucomutase-1 (PGM 1) (EC 5.4.2.2) (Glucose phosphomutase 1) (Phosphoglucomutase-2)	1.11466	0.00559743	Up
Q9D0J8	Ptms	Parathymosin				1.04939	0.0179309	Up
Q9D0K2	Oxct1 Oxct Scot	Succinyl-CoA:3-ketoacid coenzyme A transferase 1, mitochondrial (EC 2.8.3.5) (3-oxoacid CoA-transferase 1) (Somatic-type succinyl-CoA:3-oxoacid CoA-transferase) (SCOT-s)				0.830696	0.00029565	Down
Q9D0M0	Exosc7 Rrp42	Exosome complex exonuclease RRP42 (Exosome component 7) (Ribosomal RNA-processing protein 42)	1.06996	0.00429864	Up	1.12783	0.00429864	Up
Q9D0N7	Chaf1b	Chromatin assembly factor 1 subunit B (CAF-1 subunit B) (Chromatin assembly factor I p60 subunit) (CAF-I 60 kDa subunit) (CAF-I p60)	1.27235	0.0132264	Up	1.43494	0.0132264	Up
Q9D114	Hddc3 Mesh1	Guanosine-3',5'-bis(diphosphate) 3'-pyrophosphohydrolase MESH1 (EC 3.1.7.2) (HD domain-containing protein 3) (Metazoan SpoT homolog 1) (MESH1) (Penta-phosphate guanosine-3'-pyrophosphohydrolase) ((ppGpp)ase)	1.17663	0.00742663	Up	1.12487	0.00742663	Up
Q9D125	Mrps25 Rpms25	28S ribosomal protein S25, mitochondrial (MRP-S25) (S25mt)				0.708642	0.0120625	Down
Q9D187	Ciao2b Fam96b Mip18	Cytosolic iron-sulfur assembly component 2B (Mitotic spindle-associated MMXD complex subunit MIP18)	1.32679	0.000673057	Up	1.37039	0.000673057	Up
Q9D1A2	Cndp2 Cn2	Cytosolic non-specific dipeptidase (EC 3.4.13.18) (CNDP dipeptidase 2) (Glutamate carboxypeptidase-like protein 1)	0.901604	6.5365e-05	Down	0.748127	6.5365e-05	Down
Q9D1B9	Mrpl28	39S ribosomal protein L28, mitochondrial (L28mt) (MRP-L28)				0.745044	0.0101126	Down
Q9D1C1	Ube2c Ubch10	Ubiquitin-conjugating enzyme E2 C (EC 2.3.2.23) ((E3-independent) E2 ubiquitin-conjugating enzyme C) (EC 2.3.2.24) (E2 ubiquitin-conjugating enzyme C) (UbcH10) (Ubiquitin carrier protein C) (Ubiquitin-protein ligase C)	1.19678	2.24615e-06	Up	1.58199	2.24615e-06	Up
Q9D1G2	Pmvk	Phosphomevalonate kinase (PMKase) (EC 2.7.4.2)				1.11461	0.0258884	Up
Q9D1H6	Ndufaf4 Hrpap20	NADH dehydrogenase [ubiquinone] 1 alpha subcomplex assembly factor 4 (Hormone-regulated proliferation-associated protein of 20 kDa homolog)				0.760028	0.0395162	Down
Q9D1H8	Mrpl53	39S ribosomal protein L53, mitochondrial (L53mt) (MRP-L53)				0.739664	0.030509	Down
Q9D1L0	Chchd2	Coiled-coil-helix-coiled-coil-helix domain-containing protein 2	0.673005	0.000489689	Down	0.658062	0.000489689	Down
Q9D1P4	Chordc1 Chp1 Morgana	Cysteine and histidine-rich domain-containing protein 1 (CHORD domain-containing protein 1) (CHORD-containing protein 1) (Chp-1) (Protein morgana)	0.889466	0.00552855	Down	0.823592	0.00552855	Down
Q9D1Q6	Erp44 Kiaa0573 Txndc4	Endoplasmic reticulum resident protein 44 (ER protein 44) (ERp44) (Thioredoxin domain-containing protein 4)	0.932938	0.00267679	Down	0.840267	0.00267679	Down
Q9D2C6	Polr3h	DNA-directed RNA polymerase III subunit RPC8 (DNA-directed RNA polymerase III subunit H) (RNA polymerase III subunit C7)				1.20451	0.01943	Up
Q9D2G2	Dlst	Dihydrolipoyllysine-residue succinyltransferase component of 2-oxoglutarate dehydrogenase complex, mitochondrial (EC 2.3.1.61) (2-oxoglutarate dehydrogenase complex component E2) (OGDC-E2) (Dihydrolipoamide succinyltransferase component of 2-oxoglutarate dehydrogenase complex) (E2K)				0.729851	0.000139424	Down
Q9D2N9	Vps33a Bf Buff	Vacuolar protein sorting-associated protein 33A				1.32724	0.00225246	Up
Q9D2R0	Aacs	Acetoacetyl-CoA synthetase (EC 6.2.1.16)	1.25316	0.000130618	Up	1.40572	0.000130618	Up
Q9D2X5	Mau2 Kiaa0892 Scc4	MAU2 chromatid cohesion factor homolog (MAU-2) (Cohesin loading complex subunit SCC4 homolog)	1.28997	0.000148614	Up	1.44258	0.000148614	Up
Q9D2X8		Uncharacterized protein C8orf76 homolog				1.15652	0.0124032	Up
Q9D2Y4	Mlkl	Mixed lineage kinase domain-like protein				0.696205	0.00402907	Down
Q9D338	Mrpl19	39S ribosomal protein L19, mitochondrial (L19mt) (MRP-L19)	0.893464	0.000820383	Down	0.796826	0.000820383	Down
Q9D394	Rufy3 D5Bwg0860e Ripx	Protein RUFY3 (Rap2-interacting protein x) (RIPx) (Single axon-regulated protein 1) (Singar1)				1.10801	0.0397838	Up
Q9D4F8	Tubgcp4 D2Ertd435e Gcp4	Gamma-tubulin complex component 4 (GCP-4)	1.24228	0.00352059	Up	1.2621	0.00352059	Up
Q9D4H1	Exoc2 Sec5 Sec5l1	Exocyst complex component 2 (Exocyst complex component Sec5)				1.30729	0.0342682	Up
Q9D4H8	Cul2	Cullin-2 (CUL-2)				1.10853	0.0346356	Up
Q9D4J7	Phf6 Kiaa1823	PHD finger protein 6	1.13314	0.000411854	Up	1.42401	0.000411854	Up
Q9D554	Sf3a3 Sap61	Splicing factor 3A subunit 3 (SF3a60) (Spliceosome-associated protein 61) (SAP 61)				0.860446	0.0262568	Down
Q9D5V6	Syap1	Synapse-associated protein 1 (BSD domain-containing signal transducer and Akt interactor protein) (BSTA)	0.909472	0.00499636	Down	0.896881	0.00499636	Down
Q9D600	Gins2 Psf2	DNA replication complex GINS protein PSF2 (GINS complex subunit 2)	1.2289	0.00382447	Up	1.27974	0.00382447	Up
Q9D6H2	Hspb11 Ift25	Intraflagellar transport protein 25 homolog (Heat shock protein beta-11) (Hspb11) (Placental protein 25) (PP25)				0.856957	0.0334299	Down
Q9D6J3	Yju2 Ccdc94	Splicing factor YJU2 (Coiled-coil domain-containing protein 94)	0.925994	0.010432	Down	0.875619	0.010432	Down
Q9D6L8	Ppil3 Cyp10l	Peptidyl-prolyl cis-trans isomerase-like 3 (PPIase) (EC 5.2.1.8) (CYP10L) (Cyclophilin-like protein PPIL3) (Rotamase PPIL3)				1.40592	0.0242842	Up
Q9D6N1	Ca13 Car13	Carbonic anhydrase 13 (EC 4.2.1.1) (Carbonate dehydratase XIII) (Carbonic anhydrase XIII) (CA-XIII)	0.800701	7.09198e-05	Down	0.607362	7.09198e-05	Down
Q9D6R2	Idh3a	Isocitrate dehydrogenase [NAD] subunit alpha, mitochondrial (EC 1.1.1.41) (Isocitric dehydrogenase subunit alpha) (NAD(+)-specific ICDH subunit alpha)	0.925472	0.0021008	Down	0.8609	0.0021008	Down
Q9D6S7	Mrrf	Ribosome-recycling factor, mitochondrial (RRF) (Ribosome-releasing factor, mitochondrial)	0.888757	0.00343216	Down	0.777475	0.00343216	Down
Q9D6T0	Nosip	Nitric oxide synthase-interacting protein (E3 ubiquitin-protein ligase NOSIP) (EC 2.3.2.27) (RING-type E3 ubiquitin transferase NOSIP)	1.39451	0.000519517	Up	1.51425	0.000519517	Up
Q9D6Y7	Msra	Mitochondrial peptide methionine sulfoxide reductase (EC 1.8.4.11) (Peptide-methionine (S)-S-oxide reductase) (Peptide Met(O) reductase) (Protein-methionine-S-oxide reductase) (PMSR)	1.11618	0.00440062	Up	1.21129	0.00440062	Up
Q9D706	Rpap3 D15Ertd682e	RNA polymerase II-associated protein 3				1.33045	0.00330007	Up
Q9D720	Nsmce1	Non-structural maintenance of chromosomes element 1 homolog (Non-SMC element 1 homolog) (EC 2.3.2.27)	1.08542	0.00114277	Up	1.25949	0.00114277	Up
Q9D786	Haus5 Kiaa0841	HAUS augmin-like complex subunit 5	1.19417	0.000973345	Up	1.34952	0.000973345	Up
Q9D787	Ppil2	RING-type E3 ubiquitin-protein ligase PPIL2 (EC 2.3.2.27) (CYC4) (Probable inactive peptidyl-prolyl cis-trans isomerase-like 2) (PPIase)	1.25039	0.00330007	Up	1.53778	0.00330007	Up
Q9D7A6	Srp19	Signal recognition particle 19 kDa protein (SRP19)				0.909692	0.00236705	Down
Q9D7B1	Dus2 Dus2l	tRNA-dihydrouridine(20) synthase [NAD(P)+]-like (EC 1.3.1.91) (Dihydrouridine synthase 2) (tRNA-dihydrouridine synthase 2-like)	0.857916	0.00597573	Down	1.14583	0.00597573	Up
Q9D7H3	RtcA Rpc1 Rtcd1	RNA 3'-terminal phosphate cyclase (RNA cyclase) (RNA-3'-phosphate cyclase) (EC 6.5.1.4) (RNA terminal phosphate cyclase domain-containing protein 1)				1.16626	0.018973	Up
Q9D7I5	Lhpp	Phospholysine phosphohistidine inorganic pyrophosphate phosphatase (EC 3.1.3.-) (EC 3.6.1.1)	1.20053	0.0274288	Up	1.23962	0.0274288	Up
Q9D7N3	Mrps9	28S ribosomal protein S9, mitochondrial (MRP-S9) (S9mt)				0.913861	0.0385978	Down
Q9D7X3	Dusp3	Dual specificity protein phosphatase 3 (EC 3.1.3.16) (EC 3.1.3.48) (T-DSP11) (Vaccinia H1-related phosphatase) (VHR)	1.12946	2.24615e-06	Up	1.32611	2.24615e-06	Up
Q9D819	Ppa1 Pp Pyp	Inorganic pyrophosphatase (EC 3.6.1.1) (Pyrophosphate phospho-hydrolase) (PPase)	0.961356	5.98541e-05	Down	0.871557	5.98541e-05	Down
Q9D820	Prorsd1 Prdxdd1	Prolyl-tRNA synthetase associated domain-containing protein 1 (PrdX deacylase domain-containing protein 1)				1.39036	0.0175556	Up
Q9D832	Dnajb4	DnaJ homolog subfamily B member 4	0.761202	0.00126154	Down	0.626776	0.00126154	Down
Q9D892	Itpa	Inosine triphosphate pyrophosphatase (ITPase) (Inosine triphosphatase) (EC 3.6.1.9) (Non-canonical purine NTP pyrophosphatase) (Non-standard purine NTP pyrophosphatase) (Nucleoside-triphosphate diphosphatase) (Nucleoside-triphosphate pyrophosphatase) (NTPase)	1.2238	0.00742736	Up	1.17103	0.00742736	Up
Q9D8B3	Chmp4b	Charged multivesicular body protein 4b (Chromatin-modifying protein 4b) (CHMP4b)	0.817201	1.36714e-05	Down	0.636072	1.36714e-05	Down
Q9D8C4	Ifi35 Ifp35	Interferon-induced 35 kDa protein homolog (IFP 35) (Ifi-35)	0.859146	4.04954e-05	Down	0.598591	4.04954e-05	Down
Q9D8E6	Rpl4	60S ribosomal protein L4	0.928399	0.0343367	Down
Q9D8N2	Dennd10 Fam45a	DENN domain-containing protein 10 (Protein FAM45A)				1.14624	0.0371873	Up
Q9D8S4	Rexo2 Smfn	Oligoribonuclease, mitochondrial (EC 3.1.-.-) (RNA exonuclease 2 homolog) (Small fragment nuclease)				0.788753	0.0220674	Down
Q9D8S9	Bola1	BolA-like protein 1	1.23075	0.021897	Up	1.2685	0.021897	Up
Q9D8T2	Gsdmd Gsdmdc1	Gasdermin-D (Gasdermin domain-containing protein 1) [Cleaved into: Gasdermin-D, N-terminal (GSDMD-NT) (mGSDMD-NTD) (p30); Gasdermin-D, C-terminal (GSDMD-CT) (mGSDMD-CTD) (p20)]	0.92632	0.00175483	Down	0.844987	0.00175483	Down
Q9D8W5	Psmd12	26S proteasome non-ATPase regulatory subunit 12 (26S proteasome regulatory subunit RPN5) (26S proteasome regulatory subunit p55)				0.870228	0.000500852	Down
Q9D8X5	Cnot8	CCR4-NOT transcription complex subunit 8 (EC 3.1.13.4) (CCR4-associated factor 8)				1.42528	0.000118195	Up
Q9D8Y0	Efhd2 Sws1	EF-hand domain-containing protein D2 (Swiprosin-1)	0.869777	0.000270095	Down	0.745808	0.000270095	Down
Q9D902	Gtf2e2	General transcription factor IIE subunit 2 (Transcription initiation factor IIE subunit beta) (TFIIE-beta)				1.15602	0.010591	Up
Q9D906	Atg7 Apg7l	Ubiquitin-like modifier-activating enzyme ATG7 (ATG12-activating enzyme E1 ATG7) (Autophagy-related protein 7) (APG7-like) (mAGP7) (Ubiquitin-activating enzyme E1-like protein)	1.18271	0.0105943	Up
Q9D924	Isca1 Hbld2	Iron-sulfur cluster assembly 1 homolog, mitochondrial (HESB-like domain-containing protein 2) (Iron-sulfur assembly protein IscA)	0.850754	0.00427587	Down	0.714467	0.00427587	Down
Q9D945	Llph	Protein LLP homolog (Protein LAPS18-like)				0.915939	0.049717	Down
Q9D964	Gatm	Glycine amidinotransferase, mitochondrial (EC 2.1.4.1) (L-arginine:glycine amidinotransferase) (Transamidinase)				0.800959	0.00133153	Down
Q9D967	Mdp1	Magnesium-dependent phosphatase 1 (MDP-1) (EC 3.1.3.-) (EC 3.1.3.48)	1.11669	0.00523206	Up	1.23633	0.00523206	Up
Q9D9V3	Echdc1	Ethylmalonyl-CoA decarboxylase (EC 4.1.1.94) (Enoyl-CoA hydratase domain-containing protein 1) (Methylmalonyl-CoA decarboxylase) (MMCD)	1.30773	0.00181024	Up	1.35964	0.00181024	Up
Q9DAI2	Ift22 Rabl5	Intraflagellar transport protein 22 homolog (Rab-like protein 5)				1.26019	0.00783835	Up
Q9DAK9	Phpt1 Php14	14 kDa phosphohistidine phosphatase (EC 3.9.1.3) (Phosphohistidine phosphatase 1) (PHPT1) (Protein histidine phosphatase) (PHP)	1.12582	3.23543e-05	Up	1.24887	3.23543e-05	Up
Q9DAP7	Asf1b	Histone chaperone ASF1B (Anti-silencing function protein 1 homolog B) (mCIA-II)	1.36852	4.9398e-05	Up	1.63523	4.9398e-05	Up
Q9DAU1	Cnpy3 Prat4a Tnrc5	Protein canopy homolog 3 (Protein associated with Tlr4) (Trinucleotide repeat-containing gene 5 protein)	1.17566	0.0120957	Up
Q9DB05	Napa Snapa	Alpha-soluble NSF attachment protein (SNAP-alpha) (N-ethylmaleimide-sensitive factor attachment protein alpha)				0.803361	0.0182006	Down
Q9DB15	Mrpl12 Rpml12	39S ribosomal protein L12, mitochondrial (L12mt) (MRP-L12)	0.935738	8.09454e-05	Down	0.706689	8.09454e-05	Down
Q9DB16	Cab39l	Calcium-binding protein 39-like (MO25beta) (Mo25-like protein)	0.89199	0.00418637	Down	0.767421	0.00418637	Down
Q9DB20	Atp5po Atp5o D12Wsu28e	ATP synthase subunit O, mitochondrial (ATP synthase peripheral stalk subunit OSCP) (Oligomycin sensitivity conferral protein) (OSCP)				0.745328	0.00302745	Down
Q9DB85	Rrp8	Ribosomal RNA-processing protein 8 (EC 2.1.1.-) (Cerebral protein 1 homolog)				1.10313	0.0235012	Up
Q9DBB8	Dhdh	Trans-1,2-dihydrobenzene-1,2-diol dehydrogenase (EC 1.3.1.20) (D-xylose 1-dehydrogenase) (D-xylose-NADP dehydrogenase) (EC 1.1.1.179) (Dimeric dihydrodiol dehydrogenase)	1.1757	0.0131622	Up	1.11338	0.0131622	Up
Q9DBC3	Cmtr1 Ftsjd2 Kiaa0082	Cap-specific mRNA (nucleoside-2'-O-)-methyltransferase 1 (EC 2.1.1.57) (Cap methyltransferase 1) (Cap1 2'O-ribose methyltransferase 1) (MTr1) (FtsJ methyltransferase domain-containing protein 2)				0.879881	0.021277	Down
Q9DBC7	Prkar1a	cAMP-dependent protein kinase type I-alpha regulatory subunit [Cleaved into: cAMP-dependent protein kinase type I-alpha regulatory subunit, N-terminally processed]				0.929589	0.00729312	Down
Q9DBD5	Pelp1 Mnar	Proline-, glutamic acid- and leucine-rich protein 1 (Modulator of non-genomic activity of estrogen receptor)				1.41005	0.00963715	Up
Q9DBE9	Ftsj3	pre-rRNA 2'-O-ribose RNA methyltransferase FTSJ3 (EC 2.1.1.-) (Protein ftsJ homolog 3) (Putative rRNA methyltransferase 3)				1.14373	0.0272351	Up
Q9DBG6	Rpn2	Dolichyl-diphosphooligosaccharide--protein glycosyltransferase subunit 2 (Dolichyl-diphosphooligosaccharide--protein glycosyltransferase 63 kDa subunit) (Ribophorin II) (RPN-II) (Ribophorin-2)	1.20049	0.002169	Up	0.689095	0.002169	Down
Q9DBG9	Tax1bp3	Tax1-binding protein 3 (Tax interaction protein 1) (TIP-1)	1.08313	0.0173832	Up	1.07481	0.0173832	Up
Q9DBH5	Lman2	Vesicular integral-membrane protein VIP36 (Lectin mannose-binding 2) (Vesicular integral-membrane protein 36) (VIP36)	1.5628	0.00550779	Up	1.45522	0.00550779	Up
Q9DBJ1	Pgam1	Phosphoglycerate mutase 1 (EC 5.4.2.11) (EC 5.4.2.4) (BPG-dependent PGAM 1) (Phosphoglycerate mutase isozyme B) (PGAM-B)	1.0995	0.00327791	Up	1.05339	0.00327791	Up
Q9DBL1	Acadsb	Short/branched chain specific acyl-CoA dehydrogenase, mitochondrial (SBCAD) (EC 1.3.8.5) (2-methyl branched chain acyl-CoA dehydrogenase) (2-MEBCAD) (2-methylbutyryl-coenzyme A dehydrogenase) (2-methylbutyryl-CoA dehydrogenase)	0.923295	9.17642e-06	Down	0.657013	9.17642e-06	Down
Q9DBQ7	Scyl3 Pace1	Protein-associating with the carboxyl-terminal domain of ezrin (Ezrin-binding protein PACE-1) (SCY1-like protein 3)				1.36995	0.000519939	Up
Q9DBS8	Poc5	Centrosomal protein POC5 (Protein of centriole 5)	1.17158	9.27455e-05	Up	1.66137	9.27455e-05	Up
Q9DBU3	Riok3	Serine/threonine-protein kinase RIO3 (EC 2.7.11.1) (RIO kinase 3)	0.83937	0.00115836	Down	0.767721	0.00115836	Down
Q9DBX2	Pdcl PhLP1	Phosducin-like protein (PHLP)				1.19431	0.00348796	Up
Q9DBY8	Nvl	Nuclear valosin-containing protein-like (NVLp) (Nuclear VCP-like protein)	1.25172	0.0016806	Up	1.42779	0.0016806	Up
Q9DC23	Dnajc10 Erdj5 Jpdi	DnaJ homolog subfamily C member 10 (EC 1.8.4.-) (Endoplasmic reticulum DNA J domain-containing protein 5) (ER-resident protein ERdj5) (ERdj5) (Endoplasmic reticulum DnaJ-PDI fusion protein 1) (J domain-containing protein disulfide isomerase-like protein) (J domain-containing PDI-like protein) (JPDI)	1.07475	0.0125849	Up	1.10826	0.0125849	Up
Q9DC28	Csnk1d Hckid	Casein kinase I isoform delta (CKI-delta) (CKId) (EC 2.7.11.1) (Tau-protein kinase CSNK1D) (EC 2.7.11.26)	1.43087	0.00281254	Up	1.63232	0.00281254	Up
Q9DC40	Telo2 Kiaa0683	Telomere length regulation protein TEL2 homolog				1.24746	0.00550779	Up
Q9DC50	Crot Cot	Peroxisomal carnitine O-octanoyltransferase (COT) (EC 2.3.1.137)	1.4517	0.000273931	Up	1.26245	0.000273931	Up
Q9DC61	Pmpca Inpp5e	Mitochondrial-processing peptidase subunit alpha (Alpha-MPP) (Inactive zinc metalloprotease alpha) (P-55)	0.908128	5.92432e-05	Down	0.69212	5.92432e-05	Down
Q9DCB8	Isca2 Hbld1	Iron-sulfur cluster assembly 2 homolog, mitochondrial (HESB-like domain-containing protein 1)	0.807028	0.000644119	Down	0.719212	0.000644119	Down
Q9DCD0	Pgd	6-phosphogluconate dehydrogenase, decarboxylating (EC 1.1.1.44)	1.11422	0.00932557	Up
Q9DCD2	Xab2 Syf1	Pre-mRNA-splicing factor SYF1 (XPA-binding protein 2)				1.20481	0.0128952	Up
Q9DCI9	Mrpl32 Heg1	39S ribosomal protein L32, mitochondrial (L32mt) (MRP-L32) (Heart-expressed gene 1 protein)	0.903609	0.000217024	Down	0.764437	0.000217024	Down
Q9DCJ9	Npl	N-acetylneuraminate lyase (NALase) (EC 4.1.3.3) (N-acetylneuraminate pyruvate-lyase) (N-acetylneuraminic acid aldolase) (Sialate lyase) (Sialate-pyruvate lyase) (Sialic acid aldolase) (Sialic acid lyase)				0.776698	0.00558218	Down
Q9DCL2	Ciao2a Fam96a	Cytosolic iron-sulfur assembly component 2A (MIP18 family protein FAM96A)	1.14018	0.000685136	Up	1.4576	0.000685136	Up
Q9DCL8	Ppp1r2	Protein phosphatase inhibitor 2 (IPP-2)				0.786074	0.00499636	Down
Q9DCL9	Paics	Multifunctional protein ADE2 [Includes: Phosphoribosylaminoimidazole-succinocarboxamide synthase (EC 6.3.2.6) (SAICAR synthetase); Phosphoribosylaminoimidazole carboxylase (EC 4.1.1.21) (AIR carboxylase) (AIRC)]				1.09115	0.0456912	Up
Q9DCN2	Cyb5r3 Dia1	NADH-cytochrome b5 reductase 3 (B5R) (Cytochrome b5 reductase) (EC 1.6.2.2) (Diaphorase-1) [Cleaved into: NADH-cytochrome b5 reductase 3 membrane-bound form; NADH-cytochrome b5 reductase 3 soluble form]				0.872348	0.0135324	Down
Q9DCS3	Mecr Nrbf1	Enoyl-[acyl-carrier-protein] reductase, mitochondrial (EC 1.3.1.104) (2-enoyl thioester reductase) (Nuclear receptor-binding factor 1) (NRBF-1)	0.904153	0.00201941	Down	0.76636	0.00201941	Down
Q9DCT1	Akr1e2 Akr1cl2 Akr1e1	1,5-anhydro-D-fructose reductase (AF reductase) (EC 1.1.1.263) (Aldo-keto reductase family 1 member C-like protein 2) (Aldo-keto reductase family 1 member E1) (Aldo-keto reductase family 1 member E2)				1.23836	0.0414913	Up
Q9DCT6	Bap18	Chromatin complexes subunit BAP18 (BPTF-associated protein of 18 kDa)	0.800967	0.0268152	Down
Q9DCW4	Etfb	Electron transfer flavoprotein subunit beta (Beta-ETF)				0.890327	0.0333428	Down
Q9DCX2	Atp5pd Atp5h	ATP synthase subunit d, mitochondrial (ATPase subunit d) (ATP synthase peripheral stalk subunit d)				0.565649	2.19787e-06	Down
Q9EPJ9	Arfgap1 Arf1gap	ADP-ribosylation factor GTPase-activating protein 1 (ARF GAP 1) (ADP-ribosylation factor 1 GTPase-activating protein) (ARF1 GAP) (ARF1-directed GTPase-activating protein)	1.07703	0.00025358	Up	1.21659	0.00025358	Up
Q9EPK7	Xpo7 Kiaa0745 Ranbp16	Exportin-7 (Exp7) (Ran-binding protein 16)	1.21739	0.00775857	Up	1.26294	0.00775857	Up
Q9EPQ7	Stard5	StAR-related lipid transfer protein 5 (START domain-containing protein 5) (StARD5)	0.890103	0.0105022	Down	0.816341	0.0105022	Down
Q9EPU0	Upf1 Rent1	Regulator of nonsense transcripts 1 (EC 3.6.4.-) (ATP-dependent helicase RENT1) (Nonsense mRNA reducing factor 1) (NORF1) (Up-frameshift suppressor 1 homolog) (mUpf1)	1.07323	0.000561292	Up	1.26203	0.000561292	Up
Q9EQ28	Pold3	DNA polymerase delta subunit 3 (DNA polymerase delta subunit p66)				1.2596	0.00152894	Up
Q9EQ32	Pik3ap1 Bcap	Phosphoinositide 3-kinase adapter protein 1 (B-cell adapter for phosphoinositide 3-kinase) (B-cell phosphoinositide 3-kinase adapter protein 1)	0.792835	0.000346069	Down	0.878502	0.000346069	Down
Q9EQ61	Pes1 Pes	Pescadillo homolog				1.05787	0.0201532	Up
Q9EQ80	Nif3l1	NIF3-like protein 1				0.867184	0.00672572	Down
Q9EQC5	Scyl1	N-terminal kinase-like protein (105 kDa kinase-like protein) (Mitosis-associated kinase-like protein NTKL) (SCY1-like protein 1)				1.16518	0.0378596	Up
Q9EQH2	Erap1 Appils Arts1	Endoplasmic reticulum aminopeptidase 1 (EC 3.4.11.-) (ARTS-1) (Adipocyte-derived leucine aminopeptidase) (A-LAP) (Aminopeptidase PILS) (Puromycin-insensitive leucyl-specific aminopeptidase) (PILS-AP) (VEGF-induced aminopeptidase)	1.16779	0.0413136	Up	1.14921	0.0413136	Up
Q9EQH3	Vps35 Mem3	Vacuolar protein sorting-associated protein 35 (Maternal-embryonic 3) (Vesicle protein sorting 35)	1.07311	0.0241612	Up	1.07422	0.0241612	Up
Q9EQK5	Mvp	Major vault protein (MVP)	0.919478	6.04365e-05	Down	0.87332	6.04365e-05	Down
Q9EQM6	Dgcr8	Microprocessor complex subunit DGCR8 (DiGeorge syndrome critical region 8 homolog) (Gy1)				1.5306	0.0267672	Up
Q9EQS3	Mycbp Amy1	c-Myc-binding protein (Associate of Myc 1) (AMY-1)	1.06086	0.000748422	Up	1.08605	0.000748422	Up
Q9ER38	Tor3a Adir	Torsin-3A (ATP-dependent interferon-responsive protein) (Torsin family 3 member A)	0.704059	1.32813e-05	Down	0.615863	1.32813e-05	Down
Q9ER41	Tor1b	Torsin-1B (Torsin ATPase-1B) (EC 3.6.4.-) (Torsin family 1 member B)	0.876363	0.00206557	Down	0.771124	0.00206557	Down
Q9ER73	Elp4 Paxneb	Elongator complex protein 4 (PAX6 neighbor gene protein)				0.883524	0.0319512	Down
Q9ERA6	Tfip11 Stip Tip39	Tuftelin-interacting protein 11 (Septin and tuftelin-interacting protein 1) (STIP-1) (Tuftelin-interacting protein 39)				1.41	0.00262978	Up
Q9ERB0	Snap29	Synaptosomal-associated protein 29 (SNAP-29) (Golgi SNARE of 32 kDa) (Gs32) (Soluble 29 kDa NSF attachment protein) (Vesicle-membrane fusion protein SNAP-29)	0.917303	0.0126138	Down
Q9ERD8	Parvg	Gamma-parvin				1.35552	0.00588578	Up
Q9ERE3	Sgk3 Cisk Sgkl	Serine/threonine-protein kinase Sgk3 (EC 2.7.11.1) (Cytokine-independent survival kinase) (Serum/glucocorticoid-regulated kinase 3) (Serum/glucocorticoid-regulated kinase-like)				1.4831	0.00525652	Up
Q9ERE7	Mesd Mesdc2	LRP chaperone MESD (LDLR chaperone MESD) (Mesoderm development candidate 2) (Mesoderm development protein)				0.921813	0.00206777	Down
Q9ERF3	Wdr61	WD repeat-containing protein 61 (Meiotic recombination REC14 protein homolog) [Cleaved into: WD repeat-containing protein 61, N-terminally processed]				1.05353	0.0419639	Up
Q9ERG0	Lima1 D15Ertd366e Eplin	LIM domain and actin-binding protein 1 (Epithelial protein lost in neoplasm) (mEPLIN)				0.744225	0.0001137	Down
Q9ERK4	Cse1l Xpo2	Exportin-2 (Exp2) (Chromosome segregation 1-like protein) (Importin-alpha re-exporter)	1.08066	0.000963559	Up	1.18276	0.000963559	Up
Q9ERR1	Ndel1 Nudel	Nuclear distribution protein nudE-like 1 (Protein mNudE-like) (Protein Nudel) (mNudE-L)	0.799542	0.0188486	Down	0.827601	0.0188486	Down
Q9ERU9	Ranbp2	E3 SUMO-protein ligase RanBP2 (EC 2.3.2.-) (Ran-binding protein 2) (RanBP2)				1.22662	0.00179298	Up
Q9ES00	Ube4b Ufd2 Ufd2a	Ubiquitin conjugation factor E4 B (EC 2.3.2.27) (RING-type E3 ubiquitin transferase E4 B) (Ubiquitin fusion degradation protein 2)				1.11287	0.0217667	Up
Q9ES52	Inpp5d 7a33 Ship Ship1	Phosphatidylinositol 3,4,5-trisphosphate 5-phosphatase 1 (EC 3.1.3.86) (Inositol polyphosphate-5-phosphatase D) (EC 3.1.3.56) (Inositol polyphosphate-5-phosphatase of 145 kDa) (SIP-145) (Phosphatidylinositol-4,5-bisphosphate 5-phosphatase) (EC 3.1.3.36) (SH2 domain-containing inositol 5'-phosphatase 1) (SH2 domain-containing inositol phosphatase 1) (SHIP-1) (p150Ship)	1.19434	0.000256264	Up	1.26392	0.000256264	Up
Q9ES56	Trappc4 Sbdn	Trafficking protein particle complex subunit 4 (Synbindin) (TRS23 homolog)	1.18806	0.00664383	Up	1.31573	0.00664383	Up
Q9ES74	Nek7	Serine/threonine-protein kinase Nek7 (EC 2.7.11.1) (Never in mitosis A-related kinase 7) (NimA-related protein kinase 7)				1.24896	0.000745514	Up
Q9ESJ0	Xpo4 Kiaa1721	Exportin-4 (Exp4)				1.28813	0.0175471	Up
Q9ESL4	Map3k20 Mltk Zak	Mitogen-activated protein kinase kinase kinase 20 (EC 2.7.11.25) (Human cervical cancer suppressor gene 4 protein) (HCCS-4) (Leucine zipper- and sterile alpha motif kinase ZAK) (Leucine zipper- and sterile alpha motif-containing kinase) (MLK-like mitogen-activated protein triple kinase) (Mitogen-activated protein kinase kinase kinase MLT) (Mixed lineage kinase-related kinase) (MLK-related kinase)…				1.11403	0.0161456	Up
Q9EST3	Eif4enif1 Clast4	Eukaryotic translation initiation factor 4E transporter (4E-T) (eIF4E transporter) (CD40 ligand-activated specific transcript 4) (Eukaryotic translation initiation factor 4E nuclear import factor 1)				1.38613	0.00624161	Up
Q9EST5	Anp32b Pal31	Acidic leucine-rich nuclear phosphoprotein 32 family member B (Proliferation-related acidic leucine-rich protein PAL31)				1.17164	0.00125662	Up
Q9ESV0	Ddx24	ATP-dependent RNA helicase DDX24 (EC 3.6.4.13) (DEAD box protein 24)	0.840744	0.00197835	Down	1.19616	0.00197835	Up
Q9ESX5	Dkc1	H/ACA ribonucleoprotein complex subunit DKC1 (EC 5.4.99.-) (Dyskerin) (Nopp140-associated protein of 57 kDa) (Nucleolar protein NAP57) (Nucleolar protein family A member 4) (snoRNP protein DKC1)	1.06937	0.000456557	Up	0.917773	0.000456557	Down
Q9ESY9	Ifi30 Gilt Ip30	Gamma-interferon-inducible lysosomal thiol reductase (EC 1.8.-.-) (Gamma-interferon-inducible protein IP-30) (Lysosomal thiol reductase IP30)	1.37637	8.59077e-05	Up	1.44684	8.59077e-05	Up
Q9ESZ8	Gtf2i Bap135 Diws1t	General transcription factor II-I (GTFII-I) (TFII-I) (Bruton tyrosine kinase-associated protein 135) (BAP-135) (BTK-associated protein 135)	1.17869	0.000563987	Up	1.34008	0.000563987	Up
Q9ET26	Rnf114 Zfp228 Zfp313 Znf228 Znf313	E3 ubiquitin-protein ligase RNF114 (EC 2.3.2.27) (RING finger protein 114) (RING-type E3 ubiquitin transferase RNF114) (Zinc finger protein 228) (Zinc finger protein 313)				0.830302	0.010905	Down
Q9JHF7	Hpgds Gsts Pgds Ptgds2	Hematopoietic prostaglandin D synthase (H-PGDS) (EC 5.3.99.2) (GST class-sigma) (Glutathione S-transferase) (EC 2.5.1.18) (Glutathione-dependent PGD synthase) (Glutathione-requiring prostaglandin D synthase) (Prostaglandin-H2 D-isomerase)	1.3875	0.00296732	Up	1.53382	0.00296732	Up
Q9JHJ0	Tmod3	Tropomodulin-3 (Ubiquitous tropomodulin) (U-Tmod)				0.850057	0.00499636	Down
Q9JHK5	Plek	Pleckstrin	0.814688	5.98541e-05	Down	0.702021	5.98541e-05	Down
Q9JHQ5	Lztfl1	Leucine zipper transcription factor-like protein 1	0.911285	0.000139683	Down	0.882206	0.000139683	Down
Q9JHR7	Ide	Insulin-degrading enzyme (EC 3.4.24.56) (Insulin protease) (Insulinase) (Insulysin)	1.06565	0.00153237	Up	1.16194	0.00153237	Up
Q9JHS4	Clpx	ATP-dependent Clp protease ATP-binding subunit clpX-like, mitochondrial				0.889221	0.0316873	Down
Q9JHU4	Dync1h1 Dhc1 Dnch1 Dnchc1 Dyhc	Cytoplasmic dynein 1 heavy chain 1 (Cytoplasmic dynein heavy chain 1) (Dynein heavy chain, cytosolic)				0.885921	0.000618849	Down
Q9JHW2	Nit2 D16Ertd502e	Omega-amidase NIT2 (EC 3.5.1.3) (Nitrilase homolog 2)	1.04847	0.0062699	Up	1.0353	0.0062699	Up
Q9JHW4	Eefsec Selb	Selenocysteine-specific elongation factor (Elongation factor sec) (Eukaryotic elongation factor, selenocysteine-tRNA-specific) (mSelB)	1.18068	0.000544257	Up	1.32305	0.000544257	Up
Q9JHZ2	Ankh Ank	Progressive ankylosis protein (Fn54 protein)				0.719106	0.0414364	Down
Q9JI10	Stk3 Mess1 Mst2	Serine/threonine-protein kinase 3 (EC 2.7.11.1) (Mammalian STE20-like protein kinase 2) (MST-2) (STE20-like kinase MST2) [Cleaved into: Serine/threonine-protein kinase 3 36kDa subunit (MST2/N); Serine/threonine-protein kinase 3 20kDa subunit (MST2/C)]	0.801098	5.07673e-05	Down	0.8175	5.07673e-05	Down
Q9JI44	Dmap1 Mmtr	DNA methyltransferase 1-associated protein 1 (DNMAP1) (DNMT1-associated protein 1) (MAT1-mediated transcriptional repressor)	1.12584	0.0492145	Up	1.13127	0.0492145	Up
Q9JI90	Rnf14 Ara54 Triad2	E3 ubiquitin-protein ligase RNF14 (EC 2.3.2.31) (Androgen receptor-associated protein 54) (Protein Triad2) (RING finger protein 14)	1.50184	0.000211424	Up	1.70018	0.000211424	Up
Q9JIA7	Sphk2	Sphingosine kinase 2 (SK 2) (SPK 2) (EC 2.7.1.91)				0.656914	0.011205	Down
Q9JIG7	Ccdc22 DXImx40e	Coiled-coil domain-containing protein 22	0.911869	0.000870428	Down	1.1237	0.000870428	Up
Q9JII5	Dazap1	DAZ-associated protein 1 (Deleted in azoospermia-associated protein 1)				0.952531	0.00591363	Down
Q9JII6	Akr1a1 Akr1a4	Aldo-keto reductase family 1 member A1 (EC 1.1.1.2) (EC 1.1.1.33) (EC 1.1.1.372) (EC 1.1.1.54) (Alcohol dehydrogenase [NADP(+)]) (Aldehyde reductase) (Glucuronate reductase) (EC 1.1.1.19) (Glucuronolactone reductase) (EC 1.1.1.20)				0.887528	0.0286282	Down
Q9JIK5	Ddx21	Nucleolar RNA helicase 2 (EC 3.6.4.13) (DEAD box protein 21) (Gu-alpha) (Nucleolar RNA helicase Gu) (Nucleolar RNA helicase II) (RH II/Gu)	0.936394	0.000303803	Down	1.14191	0.000303803	Up
Q9JIK9	Mrps34 Tce2	28S ribosomal protein S34, mitochondrial (MRP-S34) (S34mt) (T-complex expressed gene 2 protein)				0.815002	0.00328499	Down
Q9JIW9	Ralb	Ras-related protein Ral-B (EC 3.6.5.2)				0.817033	0.0295372	Down
Q9JIX0	Eny2	Transcription and mRNA export factor ENY2 (Enhancer of yellow 2 transcription factor homolog)	1.16735	0.000240739	Up	1.65083	0.000240739	Up
Q9JJ11	Tacc3 Aint	Transforming acidic coiled-coil-containing protein 3 (ARNT-interacting protein)	1.22148	0.000417234	Up	1.43363	0.000417234	Up
Q9JJ78	Pbk Topk	Lymphokine-activated killer T-cell-originated protein kinase (EC 2.7.12.2) (PDZ-binding kinase) (T-LAK cell-originated protein kinase)	1.13878	0.0010836	Up	1.39547	0.0010836	Up
Q9JJ89	Ccdc86 Cyclon D19Ertd678e MNCb-4327	Coiled-coil domain-containing protein 86 (Cytokine-induced protein with coiled-coil domain) (mCyclon)				0.585419	0.000673057	Down
Q9JJ94	Ssna1 MNCb-2711	Sjoegren syndrome nuclear autoantigen 1 homolog	1.10193	1.00724e-05	Up	1.25687	1.00724e-05	Up
Q9JJI8	Rpl38	60S ribosomal protein L38				1.06142	0.0121393	Up
Q9JJL8	Sars2 Sarsm	Serine--tRNA ligase, mitochondrial (EC 6.1.1.11) (SerRSmt) (Seryl-tRNA synthetase) (SerRS) (Seryl-tRNA(Ser/Sec) synthetase)	0.921264	0.00428455	Down	0.8271	0.00428455	Down
Q9JJT0	Rcl1 Rnac	RNA 3'-terminal phosphate cyclase-like protein				1.54229	0.0268304	Up
Q9JJU8	Sh3bgrl	SH3 domain-binding glutamic acid-rich-like protein				0.945759	0.0089561	Down
Q9JJX7	Tdp2 Ttrap	Tyrosyl-DNA phosphodiesterase 2 (Tyr-DNA phosphodiesterase 2) (EC 3.1.4.-) (5'-tyrosyl-DNA phosphodiesterase) (5'-Tyr-DNA phosphodiesterase) (TRAF and TNF receptor-associated protein)	1.21857	0.000540793	Up	1.40905	0.000540793	Up
Q9JJY4	Ddx20 Dp103 Gemin3	Probable ATP-dependent RNA helicase DDX20 (EC 3.6.4.13) (Component of gems 3) (DEAD box protein 20) (DEAD box protein DP 103) (Gemin-3) (Regulator of steroidogenic factor 1) (ROSF-1)				1.34089	0.00907443	Up
Q9JK30	Orc3 Orc3l	Origin recognition complex subunit 3 (Origin recognition complex subunit Latheo)				1.2843	0.00566401	Up
Q9JK83	Pard6b Par6b	Partitioning defective 6 homolog beta (PAR-6 beta) (PAR-6B)	0.943849	0.00344454	Down	1.05636	0.00344454	Up
Q9JKC7	Ap4m1	AP-4 complex subunit mu-1 (AP-4 adaptor complex mu subunit) (Adaptor-related protein complex 4 subunit mu-1) (Mu subunit of AP-4) (Mu-adaptin-related protein 2) (mu-ARP2) (Mu4-adaptin) (mu4)				1.21376	0.00295048	Up
Q9JKC8	Ap3m1	AP-3 complex subunit mu-1 (AP-3 adaptor complex mu3A subunit) (Adaptor-related protein complex 3 subunit mu-1) (Mu-adaptin 3A) (Mu3A-adaptin)				1.21737	0.0438562	Up
Q9JKF1	Iqgap1	Ras GTPase-activating-like protein IQGAP1	0.872334	0.00113308	Down	0.918105	0.00113308	Down
Q9JKF7	Mrpl39	39S ribosomal protein L39, mitochondrial (L39mt) (MRP-L39)	0.85908	0.000174094	Down	0.623157	0.000174094	Down
Q9JKP7	Pole3	DNA polymerase epsilon subunit 3 (DNA polymerase II subunit 3) (DNA polymerase epsilon subunit p17) (NF-YB-like protein) (YB-like protein 1) (YBL1)				1.19575	0.0135008	Up
Q9JKR6	Hyou1 Grp170	Hypoxia up-regulated protein 1 (GRP-170) (140 kDa Ca(2+)-binding protein) (CBP-140)				0.912039	0.0145982	Down
Q9JKX6	Nudt5	ADP-sugar pyrophosphatase (EC 3.6.1.13) (8-oxo-dGDP phosphatase) (EC 3.6.1.58) (Nuclear ATP-synthesis protein NUDIX5) (EC 2.7.7.96) (Nucleoside diphosphate-linked moiety X motif 5) (Nudix motif 5)				1.05916	0.0199483	Up
Q9JKY0	Cnot9 Rcd1 Rqcd1	CCR4-NOT transcription complex subunit 9 (Cell differentiation protein RQCD1 homolog) (Rcd-1) (EPO-induced protein FL10)	1.08359	0.000143618	Up	1.32044	0.000143618	Up
Q9JL26	Fmnl1 Frl Frl1	Formin-like protein 1 (Formin-related protein)				1.10358	0.0195328	Up
Q9JL35	Hmgn5 Garp45 Nsbp1	High mobility group nucleosome-binding domain-containing protein 5 (Nucleosome-binding protein 1) (Nucleosome-binding protein 45) (NBP-45) (Protein GARP45)	1.07595	0.0131622	Up
Q9JL60	Gmeb1	Glucocorticoid modulatory element-binding protein 1 (GMEB-1)				1.14727	0.00145584	Up
Q9JLI8	Sart3 Kiaa0156	Squamous cell carcinoma antigen recognized by T-cells 3 (SART-3) (mSART-3) (Tumor-rejection antigen SART3)	1.14236	0.00465794	Up	1.18543	0.00465794	Up
Q9JLJ2	Aldh9a1	4-trimethylaminobutyraldehyde dehydrogenase (TMABA-DH) (TMABADH) (EC 1.2.1.47) (Aldehyde dehydrogenase family 9 member A1) (EC 1.2.1.3)	1.08198	0.0305049	Up
Q9JLQ2	Git2	ARF GTPase-activating protein GIT2 (ARF GAP GIT2) (Cool-interacting tyrosine-phosphorylated protein 2) (CAT-2) (CAT2) (G protein-coupled receptor kinase-interactor 2) (GRK-interacting protein 2)	1.09854	0.000305387	Up	1.27948	0.000305387	Up
Q9JLT4	Txnrd2 Trxr2	Thioredoxin reductase 2, mitochondrial (EC 1.8.1.9) (Thioredoxin reductase TR3)				0.712761	0.00555144	Down
Q9JM13	Rabgef1 Rabex5	Rab5 GDP/GTP exchange factor (Rabex-5)	0.717448	0.00318583	Down	0.752608	0.00318583	Down
Q9JM14	Nt5c Dnt1	5'(3')-deoxyribonucleotidase, cytosolic type (EC 3.1.3.-) (Cytosolic 5',3'-pyrimidine nucleotidase) (Deoxy-5'-nucleotidase 1) (dNT-1)	1.22433	0.00255855	Up	1.3065	0.00255855	Up
Q9JM76	Arpc3	Actin-related protein 2/3 complex subunit 3 (Arp2/3 complex 21 kDa subunit) (p21-ARC)				0.83476	0.0107861	Down
Q9JM90	Stap1	Signal-transducing adaptor protein 1 (STAP-1) (Stem cell adaptor protein 1)	0.757478	0.00176333	Down	0.800803	0.00176333	Down
Q9JM96	Cdc42ep4 Borg4 Cep4	Cdc42 effector protein 4 (Binder of Rho GTPases 4)	0.760217	0.00145978	Down
Q9JMA1	Usp14	Ubiquitin carboxyl-terminal hydrolase 14 (EC 3.4.19.12) (Deubiquitinating enzyme 14) (Ubiquitin thioesterase 14) (Ubiquitin-specific-processing protease 14)				1.10138	0.00332195	Up
Q9JME7	Trappc2l	Trafficking protein particle complex subunit 2-like protein				1.28745	0.0102375	Up
Q9JMH6	Txnrd1 Trxr1	Thioredoxin reductase 1, cytoplasmic (TR) (EC 1.8.1.9) (Thioredoxin reductase TR1)				0.754805	0.000762058	Down
Q9JMH9	Myo18a Myspdz	Unconventional myosin-XVIIIa (Molecule associated with JAK3 N-terminus) (MAJN) (Myosin containing a PDZ domain) (Surfactant protein receptor SP-R210) (SP-R210)	1.08804	0.00570117	Up	1.1102	0.00570117	Up
Q9QUH0	Glrx Glrx1 Grx Grx1	Glutaredoxin-1 (Thioltransferase-1) (TTase-1)	0.93739	0.000108725	Down	0.684411	0.000108725	Down
Q9QUJ7	Acsl4 Acs4 Facl4	Long-chain-fatty-acid--CoA ligase 4 (EC 6.2.1.3) (Arachidonate--CoA ligase) (EC 6.2.1.15) (Long-chain acyl-CoA synthetase 4) (LACS 4) (mACS4)	0.76553	4.40241e-05	Down	0.767574	4.40241e-05	Down
Q9QUM9	Psma6	Proteasome subunit alpha type-6 (Macropain iota chain) (Multicatalytic endopeptidase complex iota chain) (Proteasome iota chain)				0.813854	0.00805566	Down
Q9QUR7	Pin1	Peptidyl-prolyl cis-trans isomerase NIMA-interacting 1 (EC 5.2.1.8) (Peptidyl-prolyl cis-trans isomerase Pin1) (PPIase Pin1)				1.16281	0.000699612	Up
Q9QWZ1	Rad1 Rec1	Cell cycle checkpoint protein RAD1 (mRAD1) (EC 3.1.11.2) (DNA repair exonuclease rad1 homolog) (Rad1-like DNA damage checkpoint protein)				1.28182	0.00702415	Up
Q9QX47	Son Nrebp	Protein SON (Negative regulatory element-binding protein) (NRE-binding protein)	1.08339	0.000130988	Up	1.29684	0.000130988	Up
Q9QXB9	Drg2	Developmentally-regulated GTP-binding protein 2 (DRG-2) (Translation factor GTPase DRG2) (TRAFAC GTPase DRG2) (EC 3.6.5.-)	1.12297	0.00203009	Up	1.238	0.00203009	Up
Q9QXG2	Chm Rep1	Rab proteins geranylgeranyltransferase component A 1 (Choroideremia protein homolog) (Rab escort protein 1) (REP-1)				0.816948	0.0138042	Down
Q9QXK3	Copg2	Coatomer subunit gamma-2 (Gamma-2-coat protein) (Gamma-2-COP)				1.14697	0.0488961	Up
Q9QXK7	Cpsf3 Cpsf73	Cleavage and polyadenylation specificity factor subunit 3 (EC 3.1.27.-) (Cleavage and polyadenylation specificity factor 73 kDa subunit) (CPSF 73 kDa subunit) (mRNA 3'-end-processing endonuclease CPSF-73)				1.40012	0.00011583	Up
Q9QXL8	Nme7	Nucleoside diphosphate kinase 7 (NDK 7) (NDP kinase 7) (EC 2.7.4.6) (nm23-M7)	1.29579	0.0341082	Up	1.34423	0.0341082	Up
Q9QXZ0	Macf1 Acf7 Aclp7 Macf	Microtubule-actin cross-linking factor 1 (Actin cross-linking family 7)	1.06651	0.000991366	Up	1.16855	0.000991366	Up
Q9QY06	Myo9b Myr5	Unconventional myosin-IXb (Unconventional myosin-9b)	1.14458	0.00702439	Up	1.1055	0.00702439	Up
Q9QY24	Zbp1 Dlm1	Z-DNA-binding protein 1 (DNA-dependent activator of IFN-regulatory factors) (DAI) (Tumor stroma and activated macrophage protein DLM-1)				0.620812	0.00729312	Down
Q9QYB1	Clic4	Chloride intracellular channel protein 4 (mc3s5/mtCLIC)	0.791957	0.000214098	Down	0.883529	0.000214098	Down
Q9QYG0	Ndrg2 Kiaa1248 Ndr2	Protein NDRG2 (N-myc downstream-regulated gene 2 protein) (Protein Ndr2)	1.24913	0.00242443	Up	1.36035	0.00242443	Up
Q9QYI3	Dnajc7 Ttc2	DnaJ homolog subfamily C member 7 (Cytoplasmic CAR retention protein) (CCRP) (MDj11) (Tetratricopeptide repeat protein 2) (TPR repeat protein 2)				1.12827	0.00124471	Up
Q9QYJ0	Dnaja2	DnaJ homolog subfamily A member 2 (mDj3)				1.04743	0.0354804	Up
Q9QYS9	Qki Qk Qk1 Qka1	Protein quaking (MqkI) (qkI)	1.16504	0.0270544	Up	1.16462	0.0270544	Up
Q9QZA0	Ca5b Car5b	Carbonic anhydrase 5B, mitochondrial (EC 4.2.1.1) (Carbonate dehydratase VB) (Carbonic anhydrase VB) (CA-VB)	1.15693	0.000546688	Up	0.75292	0.000546688	Down
Q9QZK7	Dok3 Dokl	Docking protein 3 (Downstream of tyrosine kinase 3) (p62(dok)-like protein) (DOK-L)				0.833403	0.0472651	Down
Q9QZM0	Ubqln2 Plic2	Ubiquilin-2 (Chap1) (DSK2 homolog) (Protein linking IAP with cytoskeleton 2) (PLIC-2) (Ubiquitin-like product Chap1/Dsk2)	1.3112	0.0228975	Up	1.27212	0.0228975	Up
Q9QZN4	Fbxo6 Fbs2 Fbxo6b	F-box only protein 6 (F-box only protein 6b) (F-box protein that recognizes sugar chains 2) (F-box/G-domain protein 2)	1.23986	0.0199864	Up	1.19823	0.0199864	Up
Q9QZQ1	Afdn Af6 Mllt4	Afadin (Afadin adherens junction formation factor) (Protein Af-6)				1.11585	0.00714203	Up
Q9R061	Nubp2	Cytosolic Fe-S cluster assembly factor NUBP2 (Nucleotide-binding protein 2) (NBP 2)				1.12041	0.00302745	Up
Q9R0C8	Vav3	Guanine nucleotide exchange factor VAV3 (VAV-3)				1.2134	0.00155988	Up
Q9R0E1	Plod3	Multifunctional procollagen lysine hydroxylase and glycosyltransferase LH3 [Includes: Procollagen-lysine,2-oxoglutarate 5-dioxygenase 3 (EC 1.14.11.4) (Lysyl hydroxylase 3) (LH3); Procollagen glycosyltransferase (EC 2.4.1.50) (EC 2.4.1.66) (Galactosylhydroxylysine-glucosyltransferase) (Procollagen galactosyltransferase) (Procollagen glucosyltransferase)]	0.737339	2.52971e-05	Down	0.684074	2.52971e-05	Down
Q9R0G7	Zeb2 Sip1 Zfhx1b Zfx1b	Zinc finger E-box-binding homeobox 2 (Smad-interacting protein 1) (Zinc finger homeobox protein 1b)				1.17412	0.00314119	Up
Q9R0M5	Tpk1	Thiamin pyrophosphokinase 1 (mTPK1) (EC 2.7.6.2) (Thiamine pyrophosphokinase 1)	1.3418	0.0104744	Up	1.33813	0.0104744	Up
Q9R0P3	Esd Es10 Sid478	S-formylglutathione hydrolase (FGH) (EC 3.1.2.12) (Esterase 10) (Esterase D) (Sid 478)				0.74091	0.00180953	Down
Q9R0P4	Smap Sid2057	Small acidic protein (Sid 2057)				0.928672	0.0303117	Down
Q9R0Q7	Ptges3 Sid3177 Tebp	Prostaglandin E synthase 3 (EC 5.3.99.3) (Cytosolic prostaglandin E2 synthase) (cPGES) (Hsp90 co-chaperone) (Progesterone receptor complex p23) (Sid 3177) (Telomerase-binding protein p23)				1.18556	0.000420721	Up
Q9R0X4	Acot9 Acate2	Acyl-coenzyme A thioesterase 9, mitochondrial (Acyl-CoA thioesterase 9) (EC 3.1.2.-) (Acyl coenzyme A thioester hydrolase 2) (MTE-2) (Acyl-CoA thioester hydrolase 9) (Mitochondrial 48 kDa acyl-CoA thioester hydrolase 1) (Mt-ACT48.1) (Protein U8) (p48)	0.900207	0.00048415	Down	0.688561	0.00048415	Down
Q9R0Y5	Ak1	Adenylate kinase isoenzyme 1 (AK 1) (EC 2.7.4.3) (EC 2.7.4.6) (ATP-AMP transphosphorylase 1) (ATP:AMP phosphotransferase) (Adenylate monophosphate kinase) (Myokinase)	1.23074	0.018973	Up	1.21224	0.018973	Up
Q9R111	Gda	Guanine deaminase (Guanase) (Guanine aminase) (EC 3.5.4.3) (Guanine aminohydrolase) (GAH)				0.707461	0.0170711	Down
Q9R112	Sqor Sqrdl	Sulfide:quinone oxidoreductase, mitochondrial (SQOR) (EC 1.8.5.8) (Sulfide quinone oxidoreductase)	0.794959	0.00186787	Down	0.756889	0.00186787	Down
Q9R1C7	Prpf40a Fbp11 Fnbp3	Pre-mRNA-processing factor 40 homolog A (Formin-binding protein 11) (FBP-11) (Formin-binding protein 3)	0.87287	0.0269777	Down
Q9R1K9	Cetn2 Calt	Centrin-2 (Caltractin isoform 1)	0.863849	0.0117746	Down
Q9R1P0	Psma4	Proteasome subunit alpha type-4 (Macropain subunit C9) (Multicatalytic endopeptidase complex subunit C9) (Proteasome component C9) (Proteasome subunit L)				0.82581	0.00376122	Down
Q9R1P1	Psmb3	Proteasome subunit beta type-3 (Proteasome chain 13) (Proteasome component C10-II) (Proteasome theta chain)				0.901206	0.00261363	Down
Q9R1P4	Psma1	Proteasome subunit alpha type-1 (Macropain subunit C2) (Multicatalytic endopeptidase complex subunit C2) (Proteasome component C2) (Proteasome nu chain)				0.803907	0.000461465	Down
Q9R1T2	Sae1 Aos1 Sua1 Ubl1a1 Uble1a	SUMO-activating enzyme subunit 1 (Ubiquitin-like 1-activating enzyme E1A) [Cleaved into: SUMO-activating enzyme subunit 1, N-terminally processed]	1.14753	0.000139424	Up	1.22092	0.000139424	Up
Q9R1W5	Calcrl Crlr	Calcitonin gene-related peptide type 1 receptor (CGRP type 1 receptor) (Calcitonin receptor-like receptor)	0.746212	0.00138079	Down	0.628188	0.00138079	Down
Q9R1Z7	Pts	6-pyruvoyl tetrahydrobiopterin synthase (PTP synthase) (PTPS) (EC 4.2.3.12)	1.2784	0.0107234	Up	1.24248	0.0107234	Up
Q9R257	Hebp1 Hbp	Heme-binding protein 1 (p22HBP)	1.19273	0.00424099	Up	1.13663	0.00424099	Up
Q9WTK5	Nfkb2	Nuclear factor NF-kappa-B p100 subunit (DNA-binding factor KBF2) (Nuclear factor of kappa light polypeptide gene enhancer in B-cells 2) [Cleaved into: Nuclear factor NF-kappa-B p52 subunit]	0.671519	9.29633e-05	Down
Q9WTP6	Ak2	Adenylate kinase 2, mitochondrial (AK 2) (EC 2.7.4.3) (ATP-AMP transphosphorylase 2) (ATP:AMP phosphotransferase) (Adenylate monophosphate kinase)				0.816449	0.00352059	Down
Q9WTV6	Usp18 Ubp43	Ubl carboxyl-terminal hydrolase 18 (EC 3.4.19.-) (43 kDa ISG15-specific protease) (ISG15-specific-processing protease) (Ubl thioesterase 18)	0.610807	2.25523e-05	Down	0.874974	2.25523e-05	Down
Q9WTX5	Skp1 Skp1a	S-phase kinase-associated protein 1 (Cyclin-A/CDK2-associated protein p19) (S-phase kinase-associated protein 1A) (p19A) (p19skp1)	1.21125	0.0412252	Up	1.18464	0.0412252	Up
Q9WTX8	Mad1l1 Mad1	Mitotic spindle assembly checkpoint protein MAD1 (Mitotic arrest deficient 1-like protein 1) (MAD1-like protein 1)				1.10942	0.0110414	Up
Q9WU20	Mthfr	Methylenetetrahydrofolate reductase (EC 1.5.1.20)				0.699847	0.00205297	Down
Q9WU56	Pus1 MNCb-0873	tRNA pseudouridine synthase A (EC 5.4.99.12) (tRNA pseudouridine(38-40) synthase) (tRNA pseudouridylate synthase I) (tRNA-uridine isomerase I)				1.14054	0.00823132	Up
Q9WUA3	Pfkp Pfkc	ATP-dependent 6-phosphofructokinase, platelet type (ATP-PFK) (PFK-P) (EC 2.7.1.11) (6-phosphofructokinase type C) (Phosphofructo-1-kinase isozyme C) (PFK-C) (Phosphohexokinase)				1.10797	0.0169799	Up
Q9WUB4	Dctn6 Ws3	Dynactin subunit 6 (Dynactin subunit p27) (Protein WS-3)	0.904481	0.0203846	Down	0.911158	0.0203846	Down
Q9WUD1	Stub1 Chip	E3 ubiquitin-protein ligase CHIP (EC 2.3.2.27) (Carboxy terminus of Hsp70-interacting protein) (RING-type E3 ubiquitin transferase CHIP) (STIP1 homology and U box-containing protein 1)				1.3373	0.0021303	Up
Q9WUK4	Rfc2	Replication factor C subunit 2 (Activator 1 40 kDa subunit) (A1 40 kDa subunit) (Activator 1 subunit 2) (Replication factor C 40 kDa subunit) (RF-C 40 kDa subunit) (RFC40)				1.16786	0.0182001	Up
Q9WUP7	Uchl5 Uch37	Ubiquitin carboxyl-terminal hydrolase isozyme L5 (UCH-L5) (EC 3.4.19.12) (Ubiquitin C-terminal hydrolase UCH37) (Ubiquitin thioesterase L5)				1.2395	0.0060373	Up
Q9WUR2	Eci2 Peci	Enoyl-CoA delta isomerase 2 (EC 5.3.3.8) (Delta(3),delta(2)-enoyl-CoA isomerase) (D3,D2-enoyl-CoA isomerase) (Dodecenoyl-CoA isomerase) (Peroxisomal 3,2-trans-enoyl-CoA isomerase) (pECI)				0.724802	0.0364227	Down
Q9WUU9	Mcm3ap Ganp Map80	Germinal-center associated nuclear protein (GANP) (EC 2.3.1.48) (GC-associated DNA primase)	0.824317	0.000174094	Down	1.09156	0.000174094	Up
Q9WV03	Fam50a D0HXS9928E Xap5	Protein FAM50A (Protein XAP-5)				1.23587	0.0172623	Up
Q9WV30	Nfat5	Nuclear factor of activated T-cells 5 (NF-AT5) (Rel domain-containing transcription factor NFAT5) (T-cell transcription factor NFAT5)				1.1139	0.00548206	Up
Q9WV32	Arpc1b	Actin-related protein 2/3 complex subunit 1B (Arp2/3 complex 41 kDa subunit) (p41-ARC)				0.778645	0.00722195	Down
Q9WV54	Asah1 Asah	Acid ceramidase (AC) (ACDase) (Acid CDase) (EC 3.5.1.23) (Acylsphingosine deacylase) (N-acylethanolamine hydrolase ASAH1) (EC 3.5.1.-) (N-acylsphingosine amidohydrolase) [Cleaved into: Acid ceramidase subunit alpha; Acid ceramidase subunit beta]	1.29309	0.0111771	Up	1.17129	0.0111771	Up
Q9WV60	Gsk3b	Glycogen synthase kinase-3 beta (GSK-3 beta) (EC 2.7.11.26) (Serine/threonine-protein kinase GSK3B) (EC 2.7.11.1)				0.871207	0.0310236	Down
Q9WV70	Noc2l Nir	Nucleolar complex protein 2 homolog (Protein NOC2 homolog) (NOC2-like protein) (Novel INHAT repressor)	0.904614	9.29633e-05	Down	1.11172	9.29633e-05	Up
Q9WV80	Snx1	Sorting nexin-1				1.05105	0.00419726	Up
Q9WV96	Timm10b Fxc1 Tim9b Timm9b	Mitochondrial import inner membrane translocase subunit Tim10 B (Mitochondrial import inner membrane translocase subunit Tim9 B) (TIMM10B) (Tim10b)	0.784098	0.00846251	Down
Q9WV98	Timm9 Tim9 Tim9a Timm9a	Mitochondrial import inner membrane translocase subunit Tim9	0.89601	0.000148614	Down	0.652284	0.000148614	Down
Q9WVF7	Pole Pole1	DNA polymerase epsilon catalytic subunit A (EC 2.7.7.7) (3'-5' exodeoxyribonuclease) (EC 3.1.11.-) (DNA polymerase II subunit A)	1.18039	9.91715e-05	Up	1.44135	9.91715e-05	Up
Q9WVJ2	Psmd13	26S proteasome non-ATPase regulatory subunit 13 (26S proteasome regulatory subunit RPN9) (26S proteasome regulatory subunit S11) (26S proteasome regulatory subunit p40.5)	0.924041	0.00457792	Down	0.886036	0.00457792	Down
Q9WVK4	Ehd1 Past1	EH domain-containing protein 1 (PAST homolog 1) (mPAST1)	0.698525	2.92356e-05	Down	0.708325	2.92356e-05	Down
Q9WVL1	Ap4s1	AP-4 complex subunit sigma-1 (AP-4 adaptor complex subunit sigma-1) (Adaptor-related protein complex 4 subunit sigma-1) (Sigma-1 subunit of AP-4) (Sigma-4-adaptin) (Sigma4-adaptin)				1.31629	0.012331	Up
Q9WVL2	Stat2	Signal transducer and activator of transcription 2	0.773776	0.000299286	Down	0.650748	0.000299286	Down
Q9WVM3	Anapc7 Apc7	Anaphase-promoting complex subunit 7 (APC7) (Cyclosome subunit 7) (Prediabetic NOD sera-reactive autoantigen)	1.19637	0.0287545	Up	1.25207	0.0287545	Up
Q9WVR4	Fxr2 Fxr2h	Fragile X mental retardation syndrome-related protein 2	0.913221	0.00127986	Down
Q9Z0E0	Ncdn Kiaa0607 Sfap75	Neurochondrin (M-Sema F-associating protein of 75 kDa) (Norbin)				1.21411	0.0379265	Up
Q9Z0E6	Gbp2	Guanylate-binding protein 2 (EC 3.6.5.-) (GTP-binding protein 2) (GBP-2) (mGBP-2) (mGBP2) (Guanine nucleotide-binding protein 2) (Interferon-induced guanylate-binding protein 2)	0.824469	0.000368986	Down	0.591805	0.000368986	Down
Q9Z0G0	Gipc1 Gipc Rgs19ip1 Semcap1	PDZ domain-containing protein GIPC1 (GAIP C-terminus-interacting protein) (RGS-GAIP-interacting protein) (RGS19-interacting protein 1) (SemaF cytoplasmic domain-associated protein 1) (SEMCAP-1) (Synectin)	0.949381	0.0002399	Down	1.07013	0.0002399	Up
Q9Z0H3	Smarcb1 Baf47 Ini1 Snf5l1	SWI/SNF-related matrix-associated actin-dependent regulator of chromatin subfamily B member 1 (BRG1-associated factor 47) (BAF47) (Integrase interactor 1 protein) (SNF5 homolog) (mSNF5)	1.11123	0.00018849	Up	1.16309	0.00018849	Up
Q9Z0H4	Celf2 Cugbp2 Napor	CUGBP Elav-like family member 2 (CELF-2) (Bruno-like protein 3) (CUG triplet repeat RNA-binding protein 2) (CUG-BP2) (CUG-BP- and ETR-3-like factor 2) (ELAV-type RNA-binding protein 3) (ETR-3) (mETR-3) (Neuroblastoma apoptosis-related RNA-binding protein) (mNapor) (RNA-binding protein BRUNOL-3)	1.17429	3.14287e-05	Up	1.32417	3.14287e-05	Up
Q9Z0H8	Clip2 Cyln2 Kiaa0291	CAP-Gly domain-containing linker protein 2 (Cytoplasmic linker protein 115) (CLIP-115) (Cytoplasmic linker protein 2)				0.678882	0.00700147	Down
Q9Z0J0	Npc2	NPC intracellular cholesterol transporter 2 (Epididymal secretory protein E1) (mE1) (Niemann Pick type C2 protein homolog)	0.912282	1.95201e-05	Down	0.642959	1.95201e-05	Down
Q9Z0M5	Lipa Lip1	Lysosomal acid lipase/cholesteryl ester hydrolase (Acid cholesteryl ester hydrolase) (LAL) (EC 3.1.1.13) (Cholesteryl esterase) (Lipase A) (Sterol esterase)				0.706042	0.00412333	Down
Q9Z0N1	Eif2s3x	Eukaryotic translation initiation factor 2 subunit 3, X-linked (EC 3.6.5.3) (Eukaryotic translation initiation factor 2 subunit gamma, X-linked) (eIF-2-gamma X)	0.932286	0.0316377	Down	0.92381	0.0316377	Down
Q9Z0P5	Twf2 Ptk9l	Twinfilin-2 (A6-related protein) (mA6RP) (Twinfilin-1-like protein)	1.16067	0.000305071	Up	1.07325	0.000305071	Up
Q9Z0R4	Itsn1 Ese1 Itsn	Intersectin-1 (EH and SH3 domains protein 1)	1.08494	0.0145597	Up	1.12121	0.0145597	Up
Q9Z0R6	Itsn2 Ese2 Sh3d1B	Intersectin-2 (EH domain and SH3 domain regulator of endocytosis 2) (EH and SH3 domains protein 2) (SH3 domain-containing protein 1B)				1.09999	0.00424099	Up
Q9Z0R9	Fads2 Fadsd2	Acyl-CoA 6-desaturase (EC 1.14.19.3) (Delta(6) fatty acid desaturase) (D6D) (Delta(6) desaturase) (Delta-6 desaturase) (Fatty acid desaturase 2)	1.3947	0.000214098	Up	1.63677	0.000214098	Up
Q9Z0U1	Tjp2 Zo2	Tight junction protein ZO-2 (Tight junction protein 2) (Zona occludens protein 2) (Zonula occludens protein 2)				1.1834	0.0492775	Up
Q9Z0X1	Aifm1 Aif Pdcd8	Apoptosis-inducing factor 1, mitochondrial (EC 1.6.99.-) (Programmed cell death protein 8)	0.937513	1.27814e-05	Down	0.582668	1.27814e-05	Down
Q9Z103	Adnp	Activity-dependent neuroprotector homeobox protein (Activity-dependent neuroprotective protein)	1.36872	0.00467511	Up	1.49419	0.00467511	Up
Q9Z108	Stau1 Stau	Double-stranded RNA-binding protein Staufen homolog 1				1.13068	0.01938	Up
Q9Z110	Aldh18a1 P5cs Pycs	Delta-1-pyrroline-5-carboxylate synthase (P5CS) (Aldehyde dehydrogenase family 18 member A1) [Includes: Glutamate 5-kinase (GK) (EC 2.7.2.11) (Gamma-glutamyl kinase); Gamma-glutamyl phosphate reductase (GPR) (EC 1.2.1.41) (Glutamate-5-semialdehyde dehydrogenase) (Glutamyl-gamma-semialdehyde dehydrogenase)]				0.84011	0.00211387	Down
Q9Z179	Shcbp1 Pal	SHC SH2 domain-binding protein 1 (Protein expressed in activated lymphocytes) (mPAL) (SHC-binding protein)				1.3024	0.000534138	Up
Q9Z1B5	Mad2l1 Mad2a	Mitotic spindle assembly checkpoint protein MAD2A (Mitotic arrest deficient 2-like protein 1) (MAD2-like protein 1)	1.16137	0.000401703	Up	1.57003	0.000401703	Up
Q9Z1D1	Eif3g Eif3p42 Eif3s4	Eukaryotic translation initiation factor 3 subunit G (eIF3g) (Eukaryotic translation initiation factor 3 RNA-binding subunit) (eIF-3 RNA-binding subunit) (Eukaryotic translation initiation factor 3 subunit 4) (eIF-3-delta) (eIF3 p42) (eIF3 p44)				1.05571	0.00159139	Up
Q9Z1F9	Uba2 Sae2 Uble1b	SUMO-activating enzyme subunit 2 (EC 2.3.2.-) (Anthracycline-associated resistance ARX) (Ubiquitin-like 1-activating enzyme E1B) (Ubiquitin-like modifier-activating enzyme 2)				1.1648	0.000443248	Up
Q9Z1J3	Nfs1 Nifs	Cysteine desulfurase, mitochondrial (m-Nfs1) (EC 2.8.1.7)	0.892144	0.00663027	Down	0.828044	0.00663027	Down
Q9Z1K5	Arih1 Ari Ubch7bp Uip77	E3 ubiquitin-protein ligase ARIH1 (EC 2.3.2.31) (Protein ariadne-1 homolog) (ARI-1) (RING-type E3 ubiquitin transferase ARIH1) (UbcH7-binding protein) (UbcM4-interacting protein 77) (Ubiquitin-conjugating enzyme E2-binding protein 1)				1.22327	0.0168751	Up
Q9Z1M8	Ik Red Rer	Protein Red (Cytokine IK) (IK factor) (Protein RER)	0.8892	0.000673057	Down	1.04957	0.000673057	Up
Q9Z1N5	Ddx39b Bat1 Bat1a Uap56	Spliceosome RNA helicase Ddx39b (EC 3.6.4.13) (56 kDa U2AF65-associated protein) (DEAD box protein UAP56) (HLA-B-associated transcript 1 protein)				0.897487	0.0127372	Down
Q9Z1Q9	Vars1 Bat6 G7a Vars Vars2	Valine--tRNA ligase (EC 6.1.1.9) (Protein G7a) (Valyl-tRNA synthetase) (ValRS)	1.10031	0.000130988	Up	1.18524	0.000130988	Up
Q9Z1S0	Bub1b Mad3l	Mitotic checkpoint serine/threonine-protein kinase BUB1 beta (EC 2.7.11.1) (MAD3/BUB1-related protein kinase) (BubR1) (Mitotic checkpoint kinase MAD3L)	1.43154	2.19787e-06	Up	1.71868	2.19787e-06	Up
Q9Z1T1	Ap3b1	AP-3 complex subunit beta-1 (Adaptor protein complex AP-3 subunit beta-1) (Adaptor-related protein complex 3 subunit beta-1) (Beta-3A-adaptin) (Clathrin assembly protein complex 3 beta-1 large chain)				1.2129	0.0355489	Up
Q9Z1Z0	Uso1 Vdp	General vesicular transport factor p115 (Protein USO1 homolog) (Transcytosis-associated protein) (TAP) (Vesicle-docking protein)				0.965064	0.0119669	Down
Q9Z1Z2	Strap Unrip	Serine-threonine kinase receptor-associated protein (UNR-interacting protein)				1.08699	0.00211544	Up
Q9Z223	Mocs2	Molybdopterin synthase catalytic subunit (EC 2.8.1.12) (Molybdenum cofactor synthesis protein 2 large subunit) (Molybdenum cofactor synthesis protein 2B) (MOCS2B)				0.644474	0.00184589	Down
Q9Z224	Mocs2	Molybdopterin synthase sulfur carrier subunit (Molybdenum cofactor synthesis protein 2 small subunit) (Molybdenum cofactor synthesis protein 2A) (MOCS2A) (Sulfur carrier protein MOCS2A)				0.667115	0.00522174	Down
Q9Z265	Chek2 Chk2 Rad53	Serine/threonine-protein kinase Chk2 (EC 2.7.11.1) (CHK2 checkpoint homolog) (Checkpoint kinase 2)	1.29869	1.22981e-06	Up	1.58869	1.22981e-06	Up
Q9Z266	Snapin Bloc1s7 Snap25bp Snapap	SNARE-associated protein Snapin (Biogenesis of lysosome-related organelles complex 1 subunit 7) (BLOC-1 subunit 7) (Synaptosomal-associated protein 25-binding protein) (SNAP-associated protein)	1.17366	0.00278587	Up	1.32079	0.00278587	Up
Q9Z277	Baz1b Wbscr9 Wstf	Tyrosine-protein kinase BAZ1B (EC 2.7.10.2) (Bromodomain adjacent to zinc finger domain protein 1B) (Williams syndrome transcription factor homolog) (Williams-Beuren syndrome chromosomal region 9 protein homolog)	1.3779	0.0154673	Up
Q9Z2B9	Rps6ka4 Msk2	Ribosomal protein S6 kinase alpha-4 (S6K-alpha-4) (EC 2.7.11.1) (90 kDa ribosomal protein S6 kinase 4) (Nuclear mitogen- and stress-activated protein kinase 2) (RSK-like protein kinase) (RLSK)				1.33872	0.00552855	Up
Q9Z2E1	Mbd2	Methyl-CpG-binding domain protein 2 (Methyl-CpG-binding protein MBD2)				0.884999	0.0179663	Down
Q9Z2F2	Oasl2	2'-5'-oligoadenylate synthase-like protein 2 (EC 2.7.7.84) (54 kDa 2'-5'-oligoadenylate synthase-like protein) (p54 OASL) (M1204)	0.695831	0.0186414	Down
Q9Z2G9	Htatip2 Cc3 Tip30	Oxidoreductase HTATIP2 (EC 1.1.1.-)				0.852822	0.0113643	Down
Q9Z2I8	Suclg2	Succinate--CoA ligase [GDP-forming] subunit beta, mitochondrial (EC 6.2.1.4) (GTP-specific succinyl-CoA synthetase subunit beta) (G-SCS) (GTPSCS) (Succinyl-CoA synthetase beta-G chain) (SCS-betaG)	0.941798	0.0259315	Down	0.923645	0.0259315	Down
Q9Z2L7	Crlf3 Creme9 Cytor4	Cytokine receptor-like factor 3 (Cytokine receptor-like molecule 9) (CREME-9) (Cytokine receptor-related factor 4)				0.755117	0.0410038	Down
Q9Z2Q5	Mrpl40 Nlvcf	39S ribosomal protein L40, mitochondrial (L40mt) (MRP-L40) (Nuclear localization signal-containing protein deleted in velocardiofacial syndrome homolog)	0.861347	0.000789282	Down	0.739571	0.000789282	Down
Q9Z2U0	Psma7	Proteasome subunit alpha type-7 (Proteasome subunit RC6-1)				0.761408	0.00130744	Down
Q9Z2U1	Psma5	Proteasome subunit alpha type-5 (Macropain zeta chain) (Multicatalytic endopeptidase complex zeta chain) (Proteasome zeta chain)				0.899567	0.00848618	Down
Q9Z2W0	Dnpep	Aspartyl aminopeptidase (EC 3.4.11.21)	1.07894	0.0304934	Up
Q9Z2X1	Hnrnpf Hnrpf	Heterogeneous nuclear ribonucleoprotein F (hnRNP F) [Cleaved into: Heterogeneous nuclear ribonucleoprotein F, N-terminally processed]	0.920075	0.00505104	Down	1.08552	0.00505104	Up
Q9Z2X2	Psmd10	26S proteasome non-ATPase regulatory subunit 10 (26S proteasome regulatory subunit p28) (Gankyrin)				1.14106	0.0230541	Up
Q9Z321	Top3b Top3b1	DNA topoisomerase 3-beta-1 (EC 5.6.2.1) (DNA topoisomerase III beta-1)				1.59976	0.000775591	Up
